# Supplementary material for: RFPDR: a random forest approach for plant disease resistance protein prediction
Source: PeerJ. 2022 Apr 22;10:e11683. doi: 10.7717/peerj.11683 (PMC9037127; doi:10.7717/peerj.11683)
Supplement: Supplemental Information 2 [file peerj-10-11683-s002.xlsx]

## Sheet: Sheet1
Supplementary table S1. Revisioned disease resistance proteins, to be included in the positive dataset.
ProteinID	Author	DOI	Species	Sequence
CsWAKL08	Li et al., 2020	https://doi.org/10.1038/s41438-020-0263-y	Citrus sinensis	MAVHQHYLVLLQIIVLLLGPIEASEKFLCPSECGNVSIIYPFGIGKGCYFDKGYEVICDNSSGSPKAFLPSIKTELLDSYSDTTIRVNIPVIFLHNRIATRNHMAREVNLSGSAFTFPWRLNKFTAIGCDNYAIDLGNDSTISGGCLSVCTCDPTQKSGCYDFLCSIPPISKVLNANLSYFYSQSILQNCRSVSLVQGDWLDSSYLSNPQVLKERDQVPAMLEWGEKIGTCIEEYSSNPTSCNLNQECLMQLSSGYVCLCDSLVDGRYCPGRLICNTSNGYNCSGCPQGYYSDRYGSCQPILEIFFHKSRVKYIVIGCSGGLVLLFLLIGIWWLYKFVKRKRQIKLKQKFFKRNGGLILQQELSLSEGNIEKTKLFTSYDLEKATDNYNTNRILGQGGQ…
TaCRK2	Gu et al., 2020	https://doi.org/10.1111/mpp.12929	Triticum aestivum	MPSSTLASVAFLVCTASLFTIAAAAGDDPSSCYARDATGTVITYRPCDPTCPTFDNYTTGSAYERSLRSLLSEVPANATPTGFFKGTAGSGPEDTLFALATCQADLPPAQCRRCLQSASANLTGYCPHSKTVMAAYVGCMLCYSDQPFFGVADTGLLFYDGVADADILGRDQAAFSRVRTALFEVLRAAAAASPTLAAVGNLTYNGTHRLYGLSQCTEDLAGAECSRCLVDMATYLPAPGARPGPDDVPWKEGASAKAYSCYIRYDLRPFYVSDIALLSPTAISPLSPPTTTTSKGNRIKAGVVIAIVLGIVVIFLLSILIVYLWRKARATKYAEKDDDAASVLFDLPTLRKATGDFAEENKLGHGGFGAVYKGSLPNGREIAVKRLDKASNQGIQQLR…
Rlm9	Larkan et al., 2020	https://doi.org/10.1111/tpj.14966	Brassica napus	MSSYNLSSLFIIFSLIFFLIFDLTVARSCSSHCGGIHIPYPFGIGEGCYLNKWYEIKCDHNTSLSVSGKPVPVLSLIGKEVVNISLPDILLSYSSYRLPHGKVQIRNPMTSKGCSSNEQESTSLLNFTGSPFYVSDSNTLIAIGCNNRASLTNVEPSTVGCFSSCLPTNRTASQDYLETVNCNTKSYYAEESYGYCRERRYINETSCNGNRCCKASMPGSIQQVVGVTIDDNPTTRGGCKVAFLTDDQAYSLLDGSDPNLVLAKRYSTVELGWFIHTTNLSSFVDSLRCMPMREYLNLRNSEHYSLTYGISCACDYNSSFPNDASCRCNNGYKGNPYIPGGCKDFNECAEKRYSDNCVGGTCVDFQGHYECVYSNHRLAIGFGSSFGSLIFIVGIYGLY…
YrU1	Wang et al., 2020	https://doi.org/10.1038/s41467-020-15139-6	Triticum urartu	MEQQQSFEERTSKDSPEKMGDSALHLAARAGNVALVQKIFADCDPELVAELTDHQNQDGETALYVSAEMGHVEVVCEILKVCDLHSAFLKAHNSFDAFHIAAKQGHLVVLQELLKAFPALAMTTNSVNATALYTATLHCHIGIVNLLLDTDPRLARIARNNGKTALHIAARLGNVEVVVLLLNKDPATVFRIDRKGQTAVHMASKGHNAEILLELLKPDVSVIHLEDNKGDRPLHVATRKGKTIIVQTLISIEEIDINAINGAGETAFAIAEKLGNEELVNILREAGGVTAEEQVNPPKSIKRFKQTHDVQSQIKQKRRTNMHFHTIRKSSQKLHTEAPVCALADAMFRLPAKLDELLISHVHMLPRGAEDEIPLIKQDLEEIMAILQEHDHPGRAEDR…
TaWAK6	Dmochowska-Boguta et al., 2020	https://doi.org/10.1371/journal.pone.0227713	Triticum aestivum	MSRTFQLLLVLALVGIVRVSGSRAHKNVTHGPHSCSGVDVPYPFGIVEDGGGGDYRAGFHVMCDAGEPVLHTTGGDGKPVKIGNFSIQAAEARVWLPVVWQCYDSSGKPSRSDYRNLEFNKGGVYRISNAKNNLFVLGCKTTGYLASQPDQGSGESTSYAQFTGCLCYCNNSQSAVNGACSGVGCCHVDIPPDLTDNWVAFMSYDHTDKVNFSPCDYAFVAEKKHYTFNTTDLKRALRQNTWGWEMPVVLDWAIRDSPTCKEARKKEGYACISSNSLCLNSTNGPGYICNCRRGYEGNLYIVDGCTDINECEHLDHYSCKGVCTNRQGSYECTCPKHTHSADPYKEVCSPNFPTNAKIIVGAIGGLLVMVIMVFFWLLIEEKRKMKEHFEKVGGPTLEK…
ZmWAK	Zuo et al., 2015	https://doi.org/10.1038/ng.3170	Zea mays	MSSLLLRVLLIQLAAVECLSAAIPGCLTQCGGVEIPYPFGVGTNCSRKGFRIKCINGSAGEEIPVLLPTTRYQNIRVLNLSVSPLPEARVLLPVAWQCFNAAGGVTGIYSGDVDFNPEGVYRISNTQNELFVLGCDTYAFTKGVRVHNVNARFPYRYFTGCITVSVDEKDPRDGACAGLGCCRVDIPPGITDTSMTFSSTWTRANQTFCPCDYAFIVEKGNYTFKASDLVSHTPDNRLPLDWWTMPLRLDWAIRDNNGDSMTSISCAQAPNEPDYGCRSKHSECTNSTNGPGYFCKCAHGYDGNPYVQSDGECTNINECQDPKSHNCSSGSKCIDTDGGYYCQCNFFRRGQQCDPLIPMAAVALLTTFAAVVLGCVAIVLLQTLNNRKRFNRNGGKLLN…
RBA1	Nishimura et al., 2017	https://doi.org/10.1073/pnas.1620973114	Arabidopsis thaliana	MTSVSPRYRNVPVPKVFLSFRGEEIRHGFISHLADALERYGIMFIIDKDEQRGNDLTSLLLRIKESKVALVIFSSRFAESRFCMDEIVKMKECVDERKLLVIPIFYKVRARDVSGRTGDFGKKFWALAQKSRGCQIKEWMEALECISNKMGLSLGDGRSEADFIKEIVKEVERVLATFTSEDTEDHHCQTVKLLKGLVVGCLAHQELPLVLVFTQVYYYVKFSIFFIEEIFSSCFRKGFVLKPCKEDLQINSISIPGIDLENFKNMMQQAMYELNQMLLQSLGNIDPHRDVAFENQPQDQPDSPIALPEERRVALEATKFCGHAAYWWNQTKTTRARIGKVLIHFWEKLKKKFKDTYDRTVRI
Pita2	Meng et al., 2020	https://doi.org/10.1186/s12284-020-00377-5	Oryza sativa	MSGAGQSRGHRLGLHIDSDWPEVLLINDYAVFMGYLSMVVTGTGFLVLTWSTVILLGGFVSMLSNKDFWSLTVITLVQTRIFDVFLNGKVSHIGYSLKRLCKAARFIALPHNHKKVGFRGAVRVLVFTIVLCPLFLLYMFGLFVSPWISLWRLIQQDYGVTAGDSSSKAHLQPALVVLYSLALFQGVLFYYRAISAWEEQKLVKDVADKYMFDTVSRSSVSDYLHEIKVGCENDPSFARGRNLITYAVKLMESTSPDGYLSGARILDTLIKFNRDDASGSELPGQSMQIYNMIGSASSSPILHNLVQMLDFKSAYDGEIRLRAARIDYYPKDYKQMQLTGMQILLKLSYDKNNLFLMSNTDDPALINKIVALITSKGSLHKKQHNEWSCMAELGVKILS…
MIK2	Rhodes et al., 2021	https://doi.org/10.1038/s41467-021-20932-y	Arabidopsis thaliana	MNKTNPERKISLTSFKERMACKEKPRDLQVLLIISIVLSCSFAVSATVEEANALLKWKSTFTNQTSSSKLSSWVNPNTSSFCTSWYGVACSLGSIIRLNLTNTGIEGTFEDFPFSSLPNLTFVDLSMNRFSGTISPLWGRFSKLEYFDLSINQLVGEIPPELGDLSNLDTLHLVENKLNGSIPSEIGRLTKVTEIAIYDNLLTGPIPSSFGNLTKLVNLYLFINSLSGSIPSEIGNLPNLRELCLDRNNLTGKIPSSFGNLKNVTLLNMFENQLSGEIPPEIGNMTALDTLSLHTNKLTGPIPSTLGNIKTLAVLHLYLNQLNGSIPPELGEMESMIDLEISENKLTGPVPDSFGKLTALEWLFLRDNQLSGPIPPGIANSTELTVLQLDTNNFTGFLP…
Htn1	Hurni et al., 2015	https://doi.org/10.1073/pnas.1502522112	Zea mays	MAAHQPHLSVLLLVLLAAHVVSTSAHGEPPLPSPYNTSAHGEPPLPSTYNASMCSSFWCGGVEIRYPFYLANAIADYSGSYYSCGYTDLSVSCELEVEGSPTTWTPTIRLGGGDYTVKNISYLYDQQTISLADRDVLGGGGCPVVRHNVSFDETWLHLHNASAFDNLTFFFGCHWGPRNTPPEFADYNISCAGFNTPTISGGRSFVFKTGDLDEQEEQELALHCDEVFSVPVRRDALQAIVSNFSLTRDGYGEVLRQGFELEWNRTSEDQCGRCEGSGSGGWCAYSQKREFLGCLCSGGKVGSPFCKPSRSKRKEGPIVGAVAVAFLCLVILTCFLACRHGSLPFKSENKPGTRIESFLQKNESIHPKRYTYADVKRMTKSFAVKLGQGGFGAVYKGSL…
Xa4	Hu et al., 2017	https://doi.org/10.1038/nplants.2017.9	Oryza sativa	MAAAAALSAVAPGQRPADCPSECGGVDIPYPFGVDNCSWPGPDDFTIICKYSRPYYRGAEIVNISVEAGEMRVYSPVVSQCYNSSNTTDSDGFEFLRLNITNTPFLVAPERNEFTAIGCATLAWLWGRDDGSYLTGCISTCASLATAAKDRDPCTGLGCCQVPSIPANLSVLNISLGTGIANVAWEESPCSYAFVAEKHWYNFNRQDFERDGKSFEHRDEKMVVPTVLDWAIRKNGSCPSTGQGAPACKSEHSECVNATNGKGYLCNCSRGYAGNPYRDDGCKNINECKEPSITCYGGSTCQDTDGSYECKCQFGYRGDGRKNESQKGRCQPIIPAAIANAIAIVCIVIVLLGLFWLPKRWKRRVFFDNNGGRLLKDMDIIVFTEKELNKITNKKRTKI…
NbEIX2	Yin et al., 2020	https://doi.org/10.1111/jipb.13031	Nicotiana benthamiana	MDKRKYPRLDHFLVTWSLLLLQTALGLTSREVNKTMCIQKERDALLEFKRGLIDDFDRLSTWGDEEDKKECCKWKGIECDKRSGHVTVLDLHTEVSCPVRSCFAPMLTGKLSPSLLELHHLNYLDLSHNGFDKIEIPRFISSLKRLEYLNLSSSDFSGVIPTQLKNLTSLRILDLGNNNQLIVKDLGWLSYLSSLEILRLGGNDFQASNWFQEITKVPSLKELDLSVCGLSKFVPSPADLVKSSLISLSVLHLCCNQFTSSAEYSWLFNFSTSLTSIDLSNNQLDGPIDDRFGSLMYLEHLKLADQFNLKGVGVPSSFGNLTRLRYLDISSTRTYQWLPELFLRLSGSRKTLEVLGLNDNSMFGSLVNVTRFSALKRLYLQNNVLNGFFMERFGQVSSL…
LepR3	Larkan et al., 2013	https://doi.org/10.1111/nph.12043	Brassica napus	MKGSVKSFSLIPISFCFLFLFRDEFAVPARHLCHPQQREAILEFKNEFQIQKPCSGWTVSWVNNSDCCSWDGIACDATFGDVIELNLGGNCIHGELNSKNTILKLQSLPFLETLNLAGNYFSGNIPSSLGNLSKLTTLDLSDNAFNGEIPSSLGKLYNLTILNLSHNKLIGKIPSSFGRLKHLTGLYAADNELSGNFPVTTLLNLTKLLSLSLYDNQFTGMLPPNISSLSNLVAFYIRGNALTGTLPSSLFSIPSLLYVTLEGNQLNGTLDFGNVSSSSKLMQLRLGNNNFLGSIPRAISKLVNLATLDLSHLNTQGLALDLSILWNLKSLEELDISDLNTTTAIDLNAILSRYKWLDKLNLTGNHVTYEKRSSVSDPPLLSELYLSGCRFTTGFPELL…
RLK‐V	Hu et al., 2018	https://doi.org/10.1111/mpp.12729	Triticum aestivum	MDLCVVILLFCVFQFIHGQPDDLGFISIDCGIPVNSSYQDPSSKIIYVSDYGYVTSGENRNIASVYIKPSLAKRNLNVRFFQHGARNCYALRSLVAGNKYFVRALFYYGNYDGLNKLPVFDLYMGANYWHEVNISAAGAVKWMDIIVVAPADYLHVCLVNKGMGTPFISGLDLRPLRITLYPEVNASQSLVLISSNRFNLGPTGNRIIRYPLDPHDRLWSTYDTIPNWNEISATSVVQNYVTDVYDVPSAVMQNAATVNGSRIDFSWGPSDPSENISSSYFFVFYFSELQNVQSNAVRQFDIIVNNKTWNTQPYSPRFLFADSFSGTVQGLASYSVSLVATENATLPPILNAMEMYLVEPITEATTDTGDARAMMSIQENFGVEKNWMGDPCAPKAFAW…
Csxth04	Li et al., 2019	https://doi.org/10.3389/fpls.2019.01109	Citrus sinensis	MVVSYEGCFLLVFSLLAVVASGLYRNLPIVPFDEGYSHLFGHDNLVVHRDGKSVHLSLDERTGSGFVSHDLYLHGFFSASIKLPADYTAGVVVAFYMSNGDMFEKNHDEIDFEFLGNIRGKNWRIQTNIYGNGSTSIGREERYNLWFDPSDDFHQYSILWTDSQIIFYIDGIPIREFKRTASMGGDFPAKPMSLYATIWDGSDWATNGGKYRVNYKYAPYVTEFSDFVLHGCSFDPIEQTSSKCDITESSKVSIPTGVSPSQRIKMENFRRKHMTYSYCYDQIRYKVPPFECVINPLEAERLKVHDPVTFGGGRRHHGKRHHRSRSSGTKANDV
Gbvdr6	Yang et al., 2018	https://doi.org/10.3389/fpls.2017.02272	Gossypium barbadense	MRISLFSLLFLNSFVSVMFIVDVVLVSTQCQSDQSRLLLQLESSFSYNYDSSGKLVPLKWNQNTDCCSWDGVSCDGGGHVIGLDLNRRSISSSIDNSSSLFRLQHLQWLNLAYNEFKPAFPSAFDKLENLSYLNLSHAGFEGQIPIEISRLTRLVTLDLSVSLYLGRPLKLEKPNLEMLVQNLTKLRFLYLDDVNISAKGNEWCKALLPLTELQVLNMSGCYLSGPIHSSLSKLRSLSVIHLDFNNLSATVPKFFAEFPNLTSLSLTYTNLSGRLPDENFQIPTLQTLDLSDNDLLQGSFQKFSPNLSLQILLLSRTNFEGQVPESLGNLGKLTRIELAECNFSGAIPKTMKKLTQLVYLDFSFNRFSGPIPSFSSSRNLTYLSFGYNQLNGGIHSTDW…
Stb6	Saintenac et al., 2018	https://doi.org/10.1038/s41588-018-0051-x	Triticum aestivum	MSLSCWSWFLAFAWVWCLPLMLMAAEEQQGDGCLAKCGSVTISPPFWLTDWQTGRLCGSPGPLDFELTCYNGSYPLLPSSVPNNAGFAIMDISYEERSLRVVDLRKLQLLHDPPNIFNSCLPMWNTSAKLGRPFKISPVNLELILYNCTEKAAAAARLDKELVQAKTMRCVNTSNTFVHAGVPYDTTGTYSSYALEGCVPIVLPVLRLPSGETNTSHYERLIQSGFLLKWELPPPLPAPAPRNEPPPPPGSERRAKKIILIGITSAAATFLFACLYVLIWHRNGKGLWFFLCKTSSKTEKKYEAMIVSYGSLAPKRYMYSEVMKITSSRNNQLGKGGYGVVFKGKLHDGRLVAVKFLHDCKGNGDEFVNEVMSIGRTSHVNVVSLFGFCLEGSKRALIY…
AhRLK1	Zhang et al., 2019	https://doi.org/10.1093/jxb/erz274	Arachis hypogaea	MRTSLCCSIILLSFVFIWLNNVTVTVLGSSFSDLDTLLKLKEAMKGSKAKPDALQDWKFSTSISAHCSFSGVTCDRQNLRVVALNVSFVPLFGSIPPEIGLLDKLESLTLSSDNLTKELPMELANLTSLRLLNISHNLFSGRFPGDITVAMTELETLDIYDNSFSGTLPEEFVRLEKLRSLNLSGNYFSGEIPESYSEFESLEVLNLATNSLTGKIPRSLVKLKKLKRLSLGYDNSYSDVVPTEFGSFESLQLLDLSSCNLSGEIPPTLGALTHLHTLFLQMNNLTGTIPSQLSTMISLKSLDLSYNELTGEFPLTFSKLTNLTLINFFHNKLRGNIPPFVGDLPNLETFQVWGNNFSNVLPPNLGQNARFLYFDVTNNHFTGELPRDLCKSGRLRTFL…
ZmXa21-L	Gao et al., 2019	https://doi.org/10.1016/j.pmpp.2019.101429	Zea mays	MSPSILLLLLPYVLQLMPTSFAQVSTLPLPFGNETATDRDALLQFKASLSQQSPTLVSWNKTSDFCHWTGVTCSLRHKGRVSALNLSSAGLVGSLSPAIGNLTFLKILDLSSNNLQGGIPSTIGRLRRLQYLVFTGNSLHGGITDGLSNCTGLVIIFLGNNHLTGEIPSWLGGFPKLAALDLSKNNLTGSIPPSLGNLTSLQELYLQINQLEGSIPKELGRLKNVQWFALFVNHLSGEVPEAVFNLSSVVAFGVDQNDLHGTLPSNWGNNQPDLEFIYLAMNHFTGNVPASLANATMMDTIDLSVNNFTGRMPPEIGTLCPRIFSFDSNQIEASATEGWEFVTLLTNCTRLRVLSFRNNMLAGELPPSVGNLSSTHLQVLYTGWNEIYGNIPPGISNLV…
