# Supplementary material for: RFPDR: a random forest approach for plant disease resistance protein prediction
Source: PeerJ. 2022 Apr 22;10:e11683. doi: 10.7717/peerj.11683 (PMC9037127; doi:10.7717/peerj.11683)
Supplement: Supplemental Information 3 — Only those features finally included in the Reduced Dimension model are presented [file peerj-10-11683-s003.xlsx]

## Sheet: keep.pvalues
Suppementary table S2. Bonferroni-corrected Mann-Whitney-Wilcoxon U-test, for feature selection
(Only those features finally included in the Reduced Dimension model are presented)
Feature_ID	p-value_rep1	p-value_rep2	p-value_rep3	p-value_rep4	p-value_rep5	p-value_rep6	p-value_rep7	p-value_rep8	p-value_rep9	p-value_rep10	p-value_rep11	p-value_rep12	p-value_rep13	p-value_rep14	p-value_rep15	p-value_rep16	p-value_rep17	p-value_rep18	p-value_rep19	p-value_rep20	p-value_rep21	p-value_rep22	p-value_rep23	p-value_rep24	p-value_rep25	p-value_rep26	p-value_rep27	p-value_rep28	p-value_rep29	p-value_rep30	p-value_rep31	p-value_rep32	p-value_rep33	p-value_rep34	p-value_rep35	p-value_rep36	p-value_rep37	p-value_rep38	p-value_rep39	p-value_rep40	p-value_rep41	p-value_rep42	p-value_rep43	p-value_rep44	p-value_rep45	p-value_rep46	p-value_rep47	p-value_rep48	p-value_rep49
A	4.79314e-49	1.28765e-37	2.56649e-40	5.64969e-41	9.84776e-40	1.20945e-36	2.61751e-46	4.92208e-38	6.4577e-32	4.05417e-39	7.40287e-36	8.87297e-37	1.10622e-38	3.55167e-40	1.69022e-37	7.98356e-45	4.02437e-43	6.30506e-37	1.62789e-39	2.56129e-40	8.8119e-38	2.78117e-41	2.49918e-40	3.07219e-44	9.81521e-44	3.97368e-34	1.05532e-43	1.39884e-37	7.197e-45	3.69497e-37	8.1523e-35	3.92333e-43	1.63659e-42	1.07612e-40	5.42865e-36	1.31691e-44	2.76403e-41	2.81428e-36	1.00129e-36	2.23668e-43	1.45496e-38	1.19045e-46	6.46382e-39	1.69687e-37	8.99996e-39	2.62671e-44	7.72516e-37	1.77797e-43	2.00598e-37
AA	2.04816e-22	6.67546e-22	4.30826e-20	4.48543e-19	5.82563e-15	3.35219e-20	1.30298e-22	1.59196e-17	7.34138e-19	3.41562e-17	8.69737e-14	4.44073e-16	3.83751e-17	1.8673e-24	1.89604e-20	5.06365e-22	9.45914e-22	2.2898e-20	7.65021e-26	3.81737e-20	2.3843e-15	1.67168e-17	5.34235e-19	6.21305e-22	2.05259e-26	1.96164e-17	7.85016e-22	9.95543e-21	2.1055e-24	2.45563e-21	9.15003e-18	5.13244e-21	3.02735e-21	8.97786e-24	7.13888e-20	6.08569e-23	1.77173e-23	3.84922e-17	5.8852e-20	2.7013e-24	3.43488e-23	3.71039e-27	1.53219e-17	6.114e-21	8.15187e-21	8.76185e-25	1.43077e-18	2.28835e-21	1.20787e-22
ACF	3.5094e-15	4.50224e-15	1.30097e-14	6.4151e-14	5.07696e-14	5.57804e-14	2.36536e-16	9.36064e-16	1.78818e-12	1.10103e-14	8.69044e-12	5.42793e-17	1.88858e-14	5.95761e-11	2.36634e-15	7.2151e-11	1.12796e-10	4.56486e-15	3.17052e-11	8.90356e-13	2.9119e-12	3.7413e-14	2.15202e-11	2.09433e-16	1.07953e-17	1.25775e-14	3.32764e-15	1.72302e-16	1.86338e-14	3.49321e-15	1.1996e-14	1.81397e-14	8.45114e-11	7.15333e-18	7.50489e-14	4.83798e-14	7.34778e-13	6.9197e-13	4.91182e-17	1.16111e-13	8.01208e-12	3.02733e-14	7.03528e-13	4.71432e-15	1.52623e-14	2.9236e-12	5.59857e-16	1.3306e-14	3.86686e-15
AEG	1.14424e-13	1.04599e-15	1.16381e-15	1.96746e-14	5.16959e-12	1.18289e-15	4.67236e-12	1.61307e-11	1.82446e-10	6.8611e-15	3.75618e-12	8.76195e-15	9.14022e-19	5.55947e-15	3.04382e-14	2.16412e-11	2.94722e-11	1.46523e-13	8.39905e-16	2.95588e-11	2.49916e-14	1.13831e-17	1.03265e-15	3.0034e-15	2.58707e-15	3.39666e-13	1.85921e-15	5.84661e-14	4.76727e-12	1.00055e-13	3.82186e-16	1.86495e-14	1.49308e-14	5.14882e-18	3.40132e-12	6.32457e-12	1.66925e-11	5.71853e-15	5.99546e-14	2.82911e-14	5.78508e-13	4.23299e-14	4.75175e-11	4.95931e-15	5.86007e-15	4.08308e-16	1.914e-11	5.68392e-13	4.20643e-13
AEL	2.79408e-07	7.33682e-18	6.5891e-08	2.14642e-11	4.08836e-12	4.0372e-10	6.34417e-09	1.14176e-11	3.83336e-13	6.01005e-10	5.16799e-13	1.13463e-12	9.7105e-10	5.59114e-14	5.59518e-11	1.15738e-08	1.14077e-07	9.78877e-14	7.22151e-10	2.2474e-10	2.86625e-09	2.85475e-10	1.45081e-13	1.85839e-09	8.52549e-08	5.54748e-14	5.43293e-08	9.8525e-12	1.06149e-06	9.22291e-14	2.41677e-08	2.6855e-10	1.43419e-11	5.97846e-11	3.74717e-10	1.23703e-07	1.80075e-09	6.87763e-09	3.69535e-16	8.79813e-08	1.09625e-11	1.04954e-09	1.02145e-09	2.90303e-11	1.12933e-13	6.36241e-14	5.84185e-10	2.87168e-12	1.4706e-11
AFP	1.58672e-09	4.58628e-11	1.45098e-10	8.09347e-10	5.7093e-12	3.21529e-11	1.20246e-09	3.98575e-12	1.17684e-10	3.79345e-14	1.25916e-09	4.80404e-13	1.44575e-13	7.61558e-12	1.79363e-07	3.97811e-12	5.77123e-11	3.44984e-09	9.93384e-10	3.81465e-11	9.20155e-07	9.20869e-09	1.3403e-09	9.67575e-09	3.06014e-09	1.71613e-09	2.50804e-14	1.07745e-10	1.55843e-09	1.03717e-08	2.30324e-09	2.33383e-13	6.11785e-10	4.65564e-11	1.3364e-11	2.30354e-10	4.07943e-11	1.2212e-10	1.46288e-12	6.69453e-11	3.24754e-08	1.0546e-10	1.31798e-08	1.2628e-08	1.06798e-10	1.77594e-09	1.9582e-09	1.58413e-09	4.59265e-09
AIK	4.37986e-11	7.66048e-10	3.39441e-12	1.88417e-11	5.08762e-12	4.1205e-11	5.07475e-10	4.96325e-10	8.13786e-14	2.27962e-11	9.3843e-12	1.94323e-14	4.99105e-09	3.59358e-14	6.96846e-12	2.53639e-11	1.97357e-14	4.23234e-11	2.5226e-14	9.97465e-12	1.43735e-10	1.75633e-11	1.23828e-10	8.01742e-12	2.45989e-08	5.57424e-13	8.4346e-07	7.6621e-13	3.89709e-11	1.84217e-10	8.83866e-10	6.69074e-11	6.30636e-14	1.01762e-09	3.79118e-09	1.54584e-10	1.51919e-10	5.62161e-12	3.06516e-11	1.19778e-10	6.29054e-10	1.62576e-11	2.37801e-16	3.86865e-11	1.20944e-11	5.7062e-09	1.02369e-13	7.53411e-10	1.86741e-13
AKL	1.11675e-09	3.39927e-15	1.74249e-08	1.11997e-11	4.44121e-10	3.56462e-14	8.4623e-13	5.33372e-14	2.81529e-10	2.62834e-16	1.65776e-14	2.13903e-16	1.29813e-11	5.02115e-17	8.2948e-14	1.04887e-06	3.93351e-13	1.1803e-12	4.97873e-14	3.18042e-13	5.71538e-13	6.6545e-14	1.60485e-11	3.41927e-13	6.08563e-15	4.17848e-15	7.15001e-11	2.7967e-13	1.56813e-07	8.79253e-13	1.15759e-12	1.02816e-11	1.04694e-13	6.66694e-15	9.87586e-15	4.28064e-13	7.42079e-15	8.99328e-13	2.56725e-15	1.16951e-12	1.31355e-08	1.11221e-08	7.12292e-15	1.31936e-11	1.7338e-10	3.67282e-12	6.00552e-16	4.68989e-11	5.49351e-10
ALK	7.68586e-14	4.65932e-11	4.80192e-11	5.93626e-11	2.29283e-11	1.62342e-10	5.47788e-09	2.51175e-10	2.21555e-10	1.09509e-07	2.73195e-14	2.29183e-07	1.9036e-11	2.03272e-11	8.38664e-13	9.93129e-08	2.93315e-08	1.99213e-10	1.87016e-10	1.05026e-09	4.04231e-14	4.01004e-11	7.1781e-11	6.6071e-13	1.32284e-14	5.16218e-11	1.60467e-12	1.01259e-08	7.74462e-08	3.55572e-11	1.54547e-15	1.13289e-09	2.34402e-10	1.63172e-14	2.02866e-10	1.30624e-15	3.49196e-11	1.45317e-13	3.52652e-10	8.61079e-08	1.28876e-09	6.24321e-10	1.41934e-10	1.63276e-12	5.75758e-15	1.49706e-07	1.08132e-11	3.60065e-10	1.13559e-10
AP	1.0029e-17	2.20964e-09	4.8556e-13	3.418e-16	2.79004e-14	2.43309e-13	4.5658e-15	1.51445e-13	1.0431e-12	1.19817e-11	1.54178e-17	8.15197e-17	8.42821e-12	6.29145e-17	6.94532e-17	3.52685e-14	1.31336e-17	2.08412e-14	4.84759e-15	4.9841e-13	4.14549e-10	4.71154e-16	1.38193e-13	2.33526e-16	2.18018e-16	3.33143e-14	3.91179e-15	3.63961e-13	3.38032e-17	1.6671e-10	1.93121e-12	2.82138e-13	6.03302e-16	1.24273e-16	9.81743e-17	1.69112e-15	8.32261e-11	8.76047e-16	1.68277e-14	6.91924e-15	6.37548e-17	1.17023e-17	2.05933e-11	4.33436e-09	7.08561e-12	6.6333e-11	2.50482e-13	1.11629e-14	8.09398e-15
AS	1.56815e-22	4.47991e-22	1.0832e-16	2.08195e-18	1.41768e-17	2.66094e-16	5.87864e-18	3.76949e-17	5.73634e-21	3.68825e-19	1.80109e-17	2.01635e-20	5.41953e-22	1.0449e-13	4.42795e-22	1.61367e-20	3.37843e-20	2.16096e-15	6.34889e-22	4.40871e-19	3.35614e-19	1.85575e-19	1.00538e-22	4.9883e-19	7.84576e-21	1.8012e-16	1.30012e-16	1.39901e-17	6.85544e-17	9.74982e-15	6.73562e-22	3.45081e-21	5.78185e-19	5.63452e-21	1.51618e-13	8.16691e-20	4.44778e-15	4.92872e-21	2.75382e-23	4.08208e-17	8.83245e-22	1.31048e-18	1.36839e-14	5.30591e-19	1.59674e-22	1.14679e-22	1.1381e-17	5.048e-15	3.15036e-17
BHAR880101.lag1	1.94856e-44	1.18793e-46	1.04252e-49	1.36905e-44	2.01317e-41	2.26823e-47	2.12614e-39	2.40271e-46	1.67981e-59	5.13614e-45	1.8166e-50	6.37508e-40	1.87273e-40	4.69704e-40	2.29436e-44	5.20328e-45	4.20604e-41	1.18162e-36	9.95757e-47	6.17379e-41	6.97142e-46	1.69698e-38	1.66878e-47	7.19806e-43	3.94656e-52	8.14039e-48	5.24853e-45	1.21412e-42	6.54448e-47	1.17798e-40	8.4942e-47	1.3346e-41	2.09633e-44	2.91352e-40	2.51881e-49	1.29584e-45	3.3231e-41	1.34401e-46	1.57813e-44	2.04933e-40	1.38569e-58	1.13668e-46	1.04529e-46	7.04688e-38	7.37478e-36	2.09673e-38	1.31694e-50	1.06612e-41	6.1993e-41
BHAR880101.lag1.1	9.1529e-34	6.11017e-38	6.44543e-44	1.97478e-37	9.7787e-35	5.32914e-35	5.11761e-33	7.41051e-40	3.04745e-49	5.11153e-38	1.68562e-42	2.08549e-29	1.24249e-33	3.86571e-37	2.16079e-39	3.30444e-37	2.00443e-34	6.92254e-33	6.27334e-36	1.77789e-31	1.26738e-36	1.02054e-31	5.50448e-45	2.45864e-35	1.58262e-42	2.13896e-38	3.79488e-38	4.59965e-34	1.21782e-38	2.52324e-32	1.46383e-37	1.48075e-36	4.67948e-36	2.23584e-34	1.60919e-40	1.32281e-36	5.71607e-33	7.78004e-38	6.22743e-35	1.83796e-34	3.4829e-42	7.51809e-36	1.98327e-40	4.54822e-31	1.59105e-27	4.87083e-37	3.64703e-42	1.93592e-38	3.7667e-32
BHAR880101.lag1.2	1.97692e-39	3.12555e-44	1.29723e-49	8.66665e-43	1.6026e-40	1.28409e-40	2.40983e-39	2.25243e-45	1.99574e-55	3.47934e-44	5.29975e-48	3.60082e-35	7.06113e-39	5.92695e-43	1.63954e-45	9.31076e-43	2.26815e-39	4.80105e-39	1.58906e-41	2.62113e-37	4.31583e-43	5.1933e-38	1.23482e-50	2.27982e-41	2.54083e-48	1.6618e-44	1.23453e-44	3.55916e-40	5.47868e-44	6.7561e-39	1.25422e-43	1.59567e-41	5.31358e-42	2.17024e-40	1.27476e-46	4.40255e-42	2.40983e-39	1.62614e-43	5.41053e-41	3.24008e-40	1.2661e-47	5.61517e-41	4.9085e-47	5.41365e-37	8.79167e-33	2.63039e-42	2.32255e-48	5.13808e-44	7.33152e-38
BHAR880101.lag10	1.04387e-23	6.24401e-18	1.50884e-15	4.79985e-21	1.81472e-13	3.12542e-26	8.20646e-19	5.87262e-20	3.56459e-21	2.43741e-20	4.93953e-23	3.88805e-19	3.82406e-22	8.81305e-19	6.96716e-18	4.77047e-22	1.88674e-21	3.49542e-11	6.30281e-16	5.2841e-19	1.77848e-20	9.48272e-22	5.35289e-16	2.89325e-20	8.0252e-17	1.76324e-20	1.97605e-18	2.87004e-17	9.59438e-19	4.90464e-19	2.84047e-18	2.21508e-22	1.95539e-23	2.32751e-16	5.67639e-20	1.42969e-18	6.92284e-22	3.94225e-19	3.83552e-22	2.80311e-17	3.80116e-21	3.1052e-18	3.77143e-20	1.42162e-14	3.04719e-16	2.39462e-17	6.74002e-22	1.09112e-18	5.50337e-21
BHAR880101.lag10.1	5.109e-11	2.6702e-10	2.83205e-08	3.98078e-13	5.37923e-08	4.6414e-13	3.82229e-10	5.21601e-10	1.68261e-12	2.17238e-10	1.48772e-14	2.45148e-07	8.88264e-12	2.86157e-10	2.44962e-11	1.14635e-11	7.17583e-13	2.7012e-08	3.6072e-09	1.78562e-11	1.19065e-09	6.24151e-12	1.23225e-09	7.81519e-12	8.06818e-07	5.25681e-10	4.63839e-09	9.85342e-07	1.59436e-10	1.20896e-09	2.60364e-09	1.22833e-14	2.35004e-13	2.21115e-07	1.71011e-08	5.57287e-10	5.56894e-11	1.96262e-10	4.68345e-13	2.83737e-09	1.71315e-08	2.31372e-09	5.857e-09	8.71317e-08	4.58351e-08	1.58481e-10	1.28872e-10	1.08483e-11	3.79843e-14
BHAR880101.lag10.2	3.53664e-15	6.45221e-14	8.22617e-12	7.06082e-18	3.68108e-11	4.31301e-18	1.99031e-14	1.48772e-14	2.38207e-17	1.19921e-14	1.77918e-19	6.81928e-11	1.18007e-15	5.66064e-15	1.52009e-15	8.00308e-15	1.5258e-17	3.86707e-12	3.15219e-13	5.32602e-16	6.11483e-14	1.57877e-16	3.83929e-13	1.89311e-16	6.21322e-10	9.54366e-15	7.79453e-13	2.85592e-10	1.03912e-13	1.80513e-14	2.56279e-13	5.61461e-19	2.02355e-17	1.09453e-10	1.50704e-12	2.10224e-14	1.92234e-16	1.96208e-14	2.74491e-17	8.3158e-13	8.54137e-13	1.74532e-13	5.01096e-13	3.24407e-11	1.75955e-11	2.51201e-14	4.67123e-15	9.43048e-16	3.42934e-17
BHAR880101.lag12	8.43825e-26	9.05e-24	1.32859e-21	6.1164e-31	5.13466e-24	6.09585e-24	8.14726e-28	6.15313e-24	7.03616e-26	2.22316e-26	3.06222e-28	2.71916e-34	8.37194e-35	2.17983e-26	7.46544e-25	1.0615e-29	1.10378e-34	3.4217e-21	8.45514e-28	1.54613e-30	3.68154e-27	3.57364e-26	3.30798e-23	8.32964e-29	4.63426e-34	1.87568e-39	1.5395e-31	1.98299e-32	4.11623e-33	5.55584e-32	1.33084e-32	4.90259e-29	2.28422e-37	1.14937e-24	1.04541e-27	1.50541e-25	5.34325e-34	9.34257e-31	7.17459e-26	6.43118e-33	1.88406e-36	8.01102e-28	1.96856e-32	3.39207e-31	1.79918e-23	5.33134e-23	9.45783e-29	6.3208e-26	3.3536e-27
BHAR880101.lag12.1	6.95058e-16	1.1312e-15	6.42168e-15	1.97356e-23	1.13378e-16	4.17427e-13	6.6471e-21	1.9998e-14	3.89036e-15	4.39467e-17	1.23388e-18	3.33208e-22	2.6995e-21	1.22381e-18	2.17875e-18	1.61713e-17	4.76401e-25	1.58331e-17	2.90562e-19	1.51278e-21	3.39366e-17	1.15845e-17	8.92809e-18	1.18851e-19	2.29505e-23	8.60399e-26	1.12774e-24	1.5273e-20	1.5335e-22	3.00922e-22	1.27402e-20	1.05624e-20	1.20146e-24	1.51386e-18	4.37414e-14	3.31469e-17	9.85762e-23	7.03803e-20	1.83555e-17	1.74991e-23	2.29528e-20	1.86653e-18	5.96999e-21	2.70192e-24	5.16693e-14	3.86196e-15	2.86358e-18	1.60466e-21	1.24858e-20
BHAR880101.lag12.2	2.6862e-20	1.16538e-19	5.43188e-19	8.3583e-29	1.21232e-21	5.83998e-18	9.53939e-27	4.37244e-20	1.72048e-19	3.6155e-23	3.49471e-24	1.18e-27	3.29817e-27	1.6274e-24	1.51819e-23	2.7092e-22	1.36917e-29	5.33134e-23	1.57186e-24	7.15365e-27	8.46939e-23	2.244e-21	1.16106e-22	5.39525e-25	4.3587e-28	8.61125e-32	1.02694e-28	2.20129e-25	1.07743e-28	7.64145e-28	1.96894e-26	1.07236e-25	9.83022e-30	1.34257e-22	2.263e-18	2.06072e-22	3.64147e-28	1.15517e-25	6.46509e-22	8.74502e-28	3.17376e-25	1.23401e-23	1.99153e-27	3.99451e-30	1.33185e-18	1.06814e-19	1.92349e-24	1.7208e-26	1.18635e-24
BHAR880101.lag15	9.56892e-13	9.94347e-12	4.87344e-12	8.87124e-13	1.3317e-12	6.21039e-17	1.0095e-10	5.42154e-13	1.15682e-15	2.91824e-18	3.83376e-15	2.92449e-13	6.58916e-14	8.12883e-10	9.62069e-19	1.388e-14	3.08641e-14	9.59667e-11	2.50013e-14	7.72227e-11	3.80492e-11	2.25794e-09	1.12592e-10	6.5344e-10	1.09675e-10	1.39969e-13	4.12488e-08	6.52794e-14	4.93359e-11	3.7678e-12	1.3584e-13	1.63286e-08	2.57837e-14	9.56814e-19	1.11792e-12	1.20896e-09	2.25759e-14	5.10246e-21	2.31962e-10	3.59809e-14	9.08282e-19	1.58122e-13	9.20128e-20	9.72047e-10	3.34277e-09	1.48998e-11	4.22598e-12	1.43749e-11	4.245e-11
BHAR880101.lag2	1.231e-39	4.42982e-39	5.70858e-41	7.42599e-34	2.95314e-35	3.35408e-42	1.14514e-32	4.53771e-38	2.18816e-49	1.14093e-36	3.40072e-35	6.57449e-42	4.75776e-37	7.26173e-33	5.36329e-34	1.77662e-34	8.97134e-45	1.75767e-32	1.73955e-40	7.50518e-32	5.45618e-37	6.05949e-36	2.32169e-35	3.24008e-40	2.21072e-34	5.28763e-43	4.61205e-35	1.01088e-35	1.27918e-34	5.88942e-34	4.50242e-43	4.97623e-34	2.13896e-38	6.69325e-35	1.12133e-35	1.63186e-36	4.404e-32	3.67732e-40	2.53004e-37	6.61413e-38	9.40764e-45	1.47964e-42	5.71607e-33	1.35379e-34	2.80471e-38	1.41837e-37	3.69074e-38	2.13317e-36	5.49367e-35
BHAR880101.lag2.1	2.5049e-32	1.74343e-34	4.57389e-38	3.19001e-27	3.10798e-33	1.97748e-33	1.21786e-26	8.92182e-33	3.95762e-40	9.71501e-31	7.82407e-28	5.51539e-31	1.37399e-28	5.91877e-30	3.65386e-28	1.115e-28	1.34879e-36	1.21196e-29	1.70451e-33	2.01039e-23	1.72872e-29	7.18012e-31	9.92317e-29	1.25816e-35	7.95312e-27	1.6772e-35	1.82238e-33	4.80216e-29	4.91456e-30	3.38373e-25	4.73917e-37	8.45887e-30	1.41124e-34	1.01643e-28	2.49179e-27	2.1407e-30	1.98576e-23	1.42155e-32	3.16601e-33	1.07849e-33	4.86434e-35	1.17062e-33	2.65362e-26	2.15168e-29	1.45064e-30	7.53239e-32	4.51584e-31	1.27918e-34	1.89833e-30
BHAR880101.lag2.2	1.32637e-37	1.64789e-39	3.22194e-43	1.89792e-32	2.31651e-38	2.94196e-38	4.14016e-32	1.37308e-38	2.99286e-46	7.48801e-37	1.05464e-33	6.58247e-37	3.61795e-34	9.39703e-36	2.37166e-33	6.66317e-34	8.69338e-42	5.01461e-35	1.54801e-38	3.50701e-29	1.04682e-34	5.00614e-37	5.54709e-34	1.3346e-41	1.06804e-32	4.86008e-41	1.70902e-39	7.07386e-34	7.44352e-35	2.00879e-30	1.99408e-42	4.64728e-35	4.99315e-40	2.88779e-34	5.80297e-32	4.80765e-36	4.78563e-29	3.76106e-37	4.91266e-38	7.20427e-39	1.71829e-40	2.90703e-38	1.68448e-31	1.00794e-34	8.34114e-36	5.2674e-37	5.67512e-36	3.5784e-39	1.93238e-35
BHAR880101.lag3.1	5.66681e-23	3.07318e-23	8.59887e-28	2.49784e-29	1.03511e-20	5.27414e-36	3.86499e-26	7.69421e-27	1.42967e-25	5.76691e-27	2.32348e-23	2.867e-27	8.45214e-24	1.3061e-25	4.35095e-24	4.84065e-25	6.85525e-31	1.00297e-24	2.63572e-23	2.25401e-27	1.38488e-26	1.48779e-27	5.88516e-29	7.83247e-30	5.10972e-29	3.02638e-23	3.29814e-25	3.06222e-28	2.02132e-29	1.18593e-28	7.7375e-31	1.03334e-32	4.3426e-25	3.40996e-27	2.35635e-28	1.60253e-28	3.34756e-26	1.33779e-35	7.57844e-19	9.56377e-25	8.1427e-24	7.70781e-23	2.17266e-21	2.48993e-24	1.99153e-27	8.40373e-35	2.83226e-24	1.08092e-20	2.05755e-25
BHAR880101.lag3.2	3.87313e-18	2.56314e-18	3.0002e-22	8.5313e-24	2.30979e-16	1.21501e-30	5.88389e-21	2.74193e-22	1.18545e-20	1.03333e-21	1.34738e-17	2.18546e-21	5.5225e-19	6.14596e-21	2.62156e-19	8.40588e-21	4.98439e-26	5.69249e-20	6.36201e-18	5.39108e-22	5.50337e-21	1.06339e-22	2.46333e-23	1.30472e-23	8.24458e-24	5.16284e-18	7.7692e-20	1.36715e-22	5.94569e-24	8.24092e-23	1.49091e-25	8.42668e-28	2.93483e-20	1.94611e-22	6.4017e-23	4.59025e-23	3.67026e-21	2.34668e-29	4.13423e-14	1.82449e-19	1.38746e-18	5.67048e-18	1.04413e-16	1.03871e-18	1.20038e-22	5.62742e-29	1.57697e-18	5.2462e-16	1.19575e-20
BHAR880101.lag4	1.40186e-31	1.97965e-23	1.48499e-24	3.31489e-26	1.019e-24	4.85667e-22	3.03568e-23	5.03681e-30	8.80011e-29	5.89599e-23	3.71012e-30	1.50294e-30	5.41811e-29	1.00914e-21	1.97882e-24	8.43825e-26	1.70391e-26	1.36034e-21	4.33463e-33	2.02472e-25	3.85109e-24	3.47009e-26	6.74589e-20	3.19416e-25	3.19099e-24	3.4528e-20	2.70204e-17	7.60629e-26	6.28574e-23	5.73413e-28	5.40299e-30	8.24896e-22	2.80015e-22	1.30472e-23	7.98562e-26	5.30338e-34	9.02564e-32	2.77195e-20	5.36398e-23	2.47143e-28	3.96696e-33	3.35517e-24	8.0376e-26	2.33129e-21	3.27206e-24	2.25861e-24	4.20603e-25	3.07975e-21	9.26052e-22
BHAR880101.lag4.1	7.74678e-19	1.0144e-17	2.05814e-18	6.55092e-19	7.39987e-16	2.08229e-12	3.8273e-16	6.60863e-21	1.51386e-18	2.71625e-17	2.49382e-20	6.8381e-18	1.29998e-20	1.69255e-14	1.48463e-16	1.26069e-19	1.58641e-19	1.35454e-17	8.80532e-22	3.91505e-18	2.75654e-13	4.71492e-17	9.40575e-14	1.03912e-13	1.49395e-15	1.41641e-11	2.45987e-11	4.37559e-16	1.71188e-15	1.98136e-17	2.12844e-21	1.26954e-16	2.77542e-13	4.68236e-14	1.37477e-14	1.60996e-23	3.76072e-20	1.73733e-13	2.09227e-14	2.47132e-17	7.82037e-17	1.10313e-12	3.43271e-16	1.75738e-13	7.42607e-17	3.38951e-16	6.78961e-15	3.61509e-14	6.41574e-13
BHAR880101.lag4.2	9.2202e-24	9.39878e-22	3.69388e-23	8.74601e-24	1.05929e-20	6.73014e-17	3.62763e-21	4.4038e-26	1.61994e-23	4.03557e-22	1.64234e-25	1.62997e-23	1.80319e-25	9.84457e-20	3.24627e-21	2.39019e-24	1.43426e-24	3.89128e-23	5.14568e-28	3.48496e-23	1.44719e-17	3.38236e-22	2.64055e-18	1.17148e-18	4.82931e-20	3.05493e-16	9.59663e-16	2.21779e-21	2.52251e-20	4.14961e-23	2.97576e-26	9.11515e-21	8.48756e-18	1.05879e-18	5.00035e-19	2.48832e-28	6.13855e-26	1.17703e-17	2.33876e-19	1.19453e-21	3.21439e-22	7.15572e-18	4.00621e-21	5.73155e-18	4.01791e-21	1.25219e-20	3.53239e-20	7.37309e-19	1.56666e-17
BHAR880101.lag7	3.64e-24	4.56276e-20	5.24337e-20	8.03699e-16	4.8568e-20	2.39523e-22	2.78697e-19	2.09191e-18	1.29667e-23	9.06097e-17	1.75818e-20	2.68181e-27	1.36226e-26	2.1454e-25	9.91487e-19	3.46366e-23	2.72552e-22	9.16879e-14	3.73514e-21	4.44239e-18	2.97032e-29	1.27492e-19	1.0559e-18	2.80974e-25	2.02282e-23	2.15445e-24	4.36168e-22	9.93327e-24	6.13398e-24	1.9228e-22	8.85529e-21	9.51086e-22	8.521e-23	1.80176e-18	1.43056e-22	4.34867e-22	7.11057e-22	2.31284e-19	6.24977e-24	1.17524e-20	2.76406e-32	2.77505e-22	2.70963e-23	1.48031e-24	4.40673e-18	1.82102e-15	1.49504e-21	4.11505e-15	9.60204e-21
BHAR880101.lag7.1	6.41806e-12	3.45224e-11	5.31227e-11	1.09024e-07	8.91086e-13	1.64596e-12	2.72356e-10	1.60719e-10	7.11333e-12	8.25509e-10	3.25083e-09	1.0083e-13	2.09124e-16	5.58335e-17	1.08421e-09	3.68602e-13	1.77776e-12	2.01303e-08	6.16164e-12	5.95851e-11	2.27914e-14	6.66782e-11	1.44555e-13	1.38341e-15	5.95352e-12	3.42824e-13	1.10611e-13	1.54746e-12	9.68255e-15	2.21161e-10	1.48202e-09	8.23987e-14	1.02975e-12	6.74197e-09	1.99814e-10	2.72275e-14	3.8587e-12	2.75064e-10	2.0416e-12	2.55114e-13	1.76344e-15	2.21964e-13	8.84486e-12	1.13086e-16	1.43767e-09	2.74358e-09	4.88313e-11	9.79772e-09	2.50261e-12
BHAR880101.lag7.2	1.33617e-15	2.26296e-14	2.7816e-15	4.54822e-12	2.57737e-17	9.82554e-18	1.58689e-14	8.56266e-15	1.05502e-15	7.72041e-14	4.57374e-14	1.57268e-18	4.95423e-20	7.86632e-22	3.10248e-13	2.75934e-17	2.40583e-16	1.88647e-12	6.55796e-17	1.34546e-14	4.90464e-19	1.18301e-15	1.48598e-17	2.4362e-21	5.78689e-16	6.06295e-18	5.55027e-18	5.25938e-17	5.32801e-19	3.08347e-15	1.25306e-13	3.84199e-18	5.07133e-17	1.76607e-12	3.46489e-14	1.71107e-18	1.43597e-16	5.41468e-14	1.34332e-16	5.01883e-17	7.44308e-21	2.9773e-17	3.67551e-16	7.75039e-22	3.35137e-13	2.81358e-13	9.19802e-16	1.10558e-12	1.29257e-16
BHAR880101.lag9	7.84062e-17	8.20863e-12	4.50976e-14	3.12369e-13	1.93941e-13	2.81031e-19	3.59823e-11	6.17488e-12	5.73199e-21	1.1597e-15	7.53764e-13	6.04381e-14	6.01474e-15	4.59226e-15	2.85224e-13	5.95966e-14	5.44799e-16	3.41053e-10	6.74458e-16	5.24995e-15	2.20626e-16	1.72037e-15	1.74587e-14	1.04074e-14	1.18445e-16	7.13664e-18	2.1378e-12	2.30204e-17	9.01208e-11	1.65113e-09	4.2443e-12	4.96434e-15	5.86006e-16	7.77623e-10	8.8301e-17	5.35596e-17	1.8739e-13	6.7088e-11	1.13505e-10	8.97558e-11	1.92725e-16	1.45256e-14	1.7534e-16	3.90727e-14	5.2841e-19	2.35675e-10	8.93771e-14	3.68108e-11	1.40228e-10
BIGC670101.lag1	2.01603e-40	3.36991e-37	1.45313e-32	1.37126e-40	4.17077e-28	3.46342e-41	2.54463e-35	5.2903e-33	3.98223e-43	5.68934e-38	4.82929e-34	2.5398e-36	3.6841e-35	3.5354e-39	1.11798e-44	4.37674e-30	1.28122e-43	3.0668e-34	9.42504e-39	1.0302e-37	4.77628e-28	1.93029e-34	4.0215e-32	2.78023e-37	1.34566e-44	1.1037e-43	6.94806e-33	8.72596e-38	9.37988e-40	4.86561e-34	3.22897e-36	1.28296e-32	2.20049e-46	3.41676e-40	5.84551e-34	5.95205e-43	1.32796e-36	2.32202e-45	1.12132e-40	1.25755e-36	6.09868e-42	5.96657e-38	3.63214e-32	3.00571e-32	7.53754e-38	1.64361e-38	7.6555e-40	2.38616e-41	1.76993e-34
BIGC670101.lag1.1	1.63328e-21	7.15134e-26	5.73155e-18	9.71369e-21	4.19617e-15	5.60566e-25	1.16512e-20	1.08815e-18	1.2147e-28	6.03193e-25	3.75003e-18	3.92559e-18	4.39773e-16	7.63781e-23	6.85211e-27	2.62237e-15	1.34957e-20	3.77143e-20	7.29714e-23	5.53765e-22	6.56325e-15	4.16662e-19	2.61142e-17	5.55159e-21	5.89033e-24	2.3595e-23	1.13991e-18	7.99421e-23	2.09124e-21	1.21188e-17	1.11028e-17	5.34846e-20	4.09988e-24	7.19005e-24	1.13086e-16	1.37518e-23	2.08615e-19	9.99796e-25	4.76382e-24	1.20161e-21	6.28633e-27	1.07115e-19	1.26438e-17	1.83595e-16	1.66482e-20	6.44083e-23	4.39811e-21	1.71168e-24	4.94019e-20
BIGC670101.lag1.2	6.06001e-23	2.81015e-27	5.49213e-19	1.86572e-22	3.39811e-16	2.59347e-26	6.25688e-22	6.74589e-20	4.25542e-30	1.61127e-26	1.21893e-19	1.67772e-19	1.72748e-17	2.16806e-24	1.75136e-28	2.73205e-16	3.98759e-22	2.03665e-21	1.77771e-24	1.79364e-23	5.36637e-16	2.86857e-20	1.10917e-18	1.27528e-22	1.53483e-25	8.8344e-25	5.80647e-20	2.18863e-24	9.3905e-23	4.09802e-19	5.73979e-19	3.07975e-21	1.49091e-25	3.5502e-25	6.03059e-18	5.32687e-25	9.7418e-21	3.65629e-26	2.07083e-25	6.53968e-23	2.34834e-28	3.4217e-21	5.05587e-19	1.03896e-17	8.65001e-22	1.67429e-24	1.08949e-22	9.29987e-26	2.42907e-21
BIGC670101.lag10	2.86828e-14	4.71953e-16	3.17374e-13	4.37559e-16	1.17641e-12	3.8254e-12	3.90057e-13	5.90258e-12	6.11181e-18	3.08848e-18	1.25306e-13	2.98596e-16	2.10224e-14	2.13017e-13	6.35694e-20	2.28056e-16	7.38136e-16	1.01587e-09	1.90457e-17	4.73761e-14	4.61749e-12	3.83458e-19	4.66704e-11	4.80163e-17	8.8301e-17	4.55212e-19	6.00916e-16	2.17943e-13	2.54197e-14	5.59787e-17	5.03973e-18	1.86533e-13	3.35239e-21	1.66593e-15	8.27822e-15	6.71328e-14	1.3031e-18	3.30397e-18	5.34763e-23	2.42992e-15	5.14902e-18	2.75615e-19	1.8031e-15	4.75788e-19	1.86432e-16	2.98674e-15	5.52345e-11	3.64722e-12	3.82536e-14
BIGC670101.lag11	1.46678e-19	3.73826e-17	2.15553e-17	5.38712e-19	5.89149e-13	1.64043e-13	4.69594e-11	1.4224e-11	3.88743e-24	5.95666e-15	6.90565e-15	1.88692e-18	2.66927e-18	5.02225e-13	9.18293e-19	8.31348e-20	7.72881e-21	7.01692e-11	3.09833e-20	7.05268e-12	3.53851e-19	4.98855e-16	1.62011e-10	2.44153e-14	1.64476e-14	1.09366e-16	2.55326e-21	2.30185e-15	5.31291e-13	5.7543e-14	5.64323e-16	1.05609e-13	1.42162e-14	8.24343e-20	5.99824e-13	3.36773e-15	8.9448e-17	9.66872e-16	5.83069e-16	1.71089e-19	3.94519e-16	1.41034e-18	1.24912e-14	3.8047e-13	1.8266e-16	3.90941e-15	6.10056e-14	2.11062e-17	1.17129e-15
BIGC670101.lag12	2.27833e-34	1.16822e-34	9.57788e-28	5.28529e-26	9.83943e-28	8.62067e-29	1.67062e-26	7.77787e-30	1.47447e-33	1.14139e-31	5.05452e-30	1.31854e-31	5.83803e-35	2.18395e-35	2.5126e-34	6.76498e-37	9.50601e-36	1.93903e-30	1.34341e-40	9.81576e-33	5.11096e-28	4.09403e-30	5.49946e-25	3.1917e-36	3.22395e-35	5.3184e-38	6.66008e-37	2.40081e-25	1.519e-30	8.90466e-36	3.16709e-36	7.87641e-31	4.66674e-33	4.93229e-33	5.79384e-35	1.2419e-29	6.01866e-33	9.05832e-32	1.04674e-30	1.13523e-40	3.34124e-29	6.42006e-36	9.76257e-27	8.36708e-23	3.3081e-31	3.78091e-33	2.18935e-29	1.94746e-41	4.66242e-30
BIGC670101.lag13	3.14564e-17	3.07238e-17	8.8758e-17	1.08804e-16	2.41847e-14	1.32279e-16	4.78372e-11	4.98844e-13	4.94543e-19	2.54118e-12	2.30225e-13	9.20235e-17	6.31807e-14	1.08938e-14	2.91113e-16	1.24912e-14	9.39116e-18	6.69511e-11	4.04764e-14	6.43184e-12	2.28999e-14	7.6207e-17	1.46196e-11	6.08167e-19	1.1708e-17	1.36467e-13	2.22887e-16	2.11168e-15	8.51659e-17	1.38888e-16	7.42607e-17	1.93388e-11	2.74046e-20	2.66269e-11	2.54931e-18	8.7717e-15	6.24401e-18	1.8115e-17	2.99004e-18	8.02244e-15	2.1611e-18	2.14526e-16	1.66593e-15	6.02523e-13	1.82352e-11	1.58154e-15	2.99276e-12	5.97138e-13	3.63143e-12
BIGC670101.lag14	6.99681e-17	6.07339e-15	1.05971e-10	1.12468e-11	7.24966e-11	5.97138e-13	1.65739e-09	9.50906e-12	1.46119e-12	3.96518e-16	3.18095e-13	1.46197e-16	3.15323e-12	1.00364e-13	1.49339e-18	9.86073e-19	6.24269e-17	6.72804e-12	2.96592e-18	1.39326e-13	9.10519e-14	8.39449e-14	1.57531e-10	4.5107e-17	9.51543e-14	1.62542e-13	7.39559e-10	5.04961e-15	2.07251e-13	6.49306e-11	8.61177e-14	1.72658e-11	3.15323e-12	6.31364e-15	3.4092e-15	9.24242e-18	2.58626e-13	1.0769e-16	6.31585e-13	2.15517e-10	6.79551e-16	9.7893e-20	1.64504e-11	1.51041e-09	6.65632e-12	1.34951e-15	2.61435e-12	6.7079e-15	5.99824e-13
BIGC670101.lag15	6.61177e-32	1.45674e-22	1.38088e-24	3.06177e-21	9.57096e-27	1.81371e-26	2.76673e-22	1.95911e-29	9.62148e-29	1.44139e-28	1.71089e-19	6.76696e-28	1.9242e-26	9.32127e-27	9.13876e-29	1.18999e-28	6.14831e-25	2.39019e-24	2.43037e-31	2.75844e-22	1.10762e-25	2.72633e-23	9.62463e-25	1.35066e-24	8.02075e-29	3.96135e-27	6.16445e-22	6.28633e-27	8.48369e-28	5.12683e-25	7.50818e-26	1.09952e-24	1.9389e-27	1.62772e-32	8.44486e-29	1.65957e-30	8.62067e-29	7.82469e-34	2.56075e-21	6.76696e-28	4.60778e-36	1.0395e-29	5.03681e-30	8.91629e-26	5.39856e-31	1.71168e-24	3.47082e-29	2.14108e-32	2.46541e-30
BIGC670101.lag16	1.87857e-23	7.70435e-19	8.6482e-20	4.12552e-29	6.11489e-24	5.58103e-23	5.2261e-19	6.80042e-22	8.99396e-24	1.66372e-22	2.12728e-19	2.41308e-26	3.95741e-18	3.66825e-26	1.24168e-23	3.27412e-19	4.75272e-29	4.011e-18	2.51352e-24	1.07033e-27	3.67026e-21	1.76097e-24	7.87961e-20	4.76216e-26	5.42977e-25	8.00217e-21	8.55312e-21	3.56053e-23	6.96968e-24	1.02525e-17	7.52797e-18	5.16956e-20	1.81484e-25	2.48715e-25	1.11443e-27	5.13992e-22	5.55159e-21	7.95539e-25	1.03639e-21	6.56924e-24	3.36385e-16	1.85671e-20	3.78551e-23	4.98886e-22	4.01225e-23	7.89342e-24	1.54433e-21	3.12532e-28	3.61269e-22
BIGC670101.lag17	3.71878e-17	1.85013e-17	2.94994e-18	2.79523e-16	1.67296e-11	3.97568e-22	2.91853e-16	6.53291e-19	2.11472e-18	1.50002e-19	1.24858e-20	1.15973e-21	1.45044e-19	1.34904e-13	7.19891e-20	5.16956e-20	1.15842e-20	1.54201e-17	1.68242e-19	1.43026e-19	7.50333e-17	1.03609e-16	3.13742e-17	1.72815e-20	2.32348e-23	8.8758e-17	1.19084e-18	4.47609e-16	1.86573e-19	6.67549e-15	3.26311e-16	2.19121e-15	1.28139e-20	1.39773e-25	1.34041e-21	4.33533e-20	9.24907e-23	2.2562e-20	6.14903e-19	4.69417e-20	2.77705e-23	3.53851e-19	9.54439e-20	2.12735e-17	3.47448e-17	8.8577e-22	3.13683e-15	2.52187e-18	8.09608e-13
BIGC670101.lag18	4.15945e-31	1.57315e-19	1.21052e-18	4.09403e-30	9.71019e-22	3.66008e-23	6.4614e-19	2.16318e-19	5.41451e-24	9.739e-22	4.19261e-25	6.77721e-29	3.51289e-21	1.68406e-20	8.88401e-22	2.49816e-22	2.37788e-27	2.96592e-18	3.11605e-20	2.21549e-25	7.9674e-24	2.32491e-25	2.74469e-24	1.83744e-21	1.89222e-29	6.84533e-23	5.39525e-25	1.15973e-21	8.41808e-23	1.74451e-23	6.94352e-27	2.99004e-18	6.72155e-25	1.32729e-27	1.98576e-23	5.41811e-29	4.28421e-21	8.95379e-28	1.73921e-18	3.63773e-23	4.90252e-31	7.31344e-28	2.61652e-16	1.62847e-21	4.23018e-24	1.90088e-28	4.91298e-21	1.53611e-20	3.36385e-16
BIGC670101.lag19	1.63179e-25	1.06544e-25	1.23145e-28	3.17449e-32	5.04627e-23	3.11013e-22	1.05697e-22	2.00753e-28	2.31002e-25	9.57433e-21	6.878e-26	3.69746e-24	8.27024e-24	1.67429e-24	5.44242e-26	1.22838e-24	9.39263e-33	4.22649e-23	3.02487e-30	2.71735e-22	4.46335e-28	4.09542e-27	4.24809e-19	7.17738e-27	2.11776e-32	5.16616e-34	5.20926e-25	1.59025e-25	2.70963e-23	6.53968e-23	1.42974e-24	2.91998e-25	5.82466e-29	2.77649e-36	1.04667e-31	2.23333e-40	1.67441e-25	4.81575e-31	1.80115e-27	9.3917e-32	1.52954e-32	1.91141e-24	1.61716e-24	6.72167e-33	2.49348e-26	7.4842e-30	4.4785e-28	1.78987e-29	1.21071e-30
BIGC670101.lag2	5.38082e-24	6.70097e-23	1.58546e-20	1.07236e-25	4.42382e-21	1.27854e-21	7.79324e-15	3.38236e-22	4.73414e-24	5.17105e-23	1.35228e-19	1.59538e-25	4.04766e-22	8.97092e-20	2.11095e-22	7.18861e-21	4.17988e-26	2.99004e-18	7.27497e-23	1.85481e-16	1.21211e-19	2.01183e-19	1.99762e-18	9.29987e-26	4.21341e-28	1.17072e-23	2.8735e-19	3.80316e-24	1.23786e-17	4.26689e-18	4.50738e-22	8.48112e-19	4.83882e-24	7.87992e-25	1.35331e-26	1.5946e-20	6.15307e-23	1.0673e-26	7.97948e-27	7.94266e-24	1.96504e-27	7.01335e-26	9.66845e-26	2.18858e-22	5.07896e-22	2.4028e-20	2.70742e-21	1.42954e-20	3.60156e-18
BIGC670101.lag20	1.45159e-21	8.58283e-17	1.78506e-16	1.76326e-21	3.76967e-16	5.63011e-19	9.85209e-14	4.33323e-14	1.2667e-20	1.42192e-18	1.37823e-16	1.57081e-17	6.7476e-17	1.97979e-13	2.57764e-15	1.0769e-16	7.30333e-22	9.92804e-20	8.62385e-20	1.52061e-13	1.18518e-19	1.43159e-23	3.25778e-12	8.62184e-19	1.0192e-22	3.81264e-22	1.46703e-20	1.06863e-14	1.1583e-12	1.02565e-09	7.72344e-24	3.96518e-16	9.50134e-16	2.71625e-17	7.79324e-15	1.93143e-23	1.62233e-20	2.31731e-22	1.8767e-18	1.40267e-18	1.84536e-16	1.04438e-19	6.94275e-21	6.57751e-16	1.96192e-19	2.81031e-19	1.59086e-19	1.3296e-16	6.03876e-13
BIGC670101.lag21	2.53546e-19	1.82296e-10	7.22071e-12	5.33508e-12	3.42592e-15	1.268e-09	1.02241e-13	6.82971e-12	2.565e-15	3.9689e-12	7.18432e-10	2.04796e-14	9.50134e-16	4.15348e-12	1.25425e-18	3.69578e-15	1.01837e-12	2.70083e-15	2.73567e-14	1.92175e-11	1.18006e-13	2.81814e-19	6.77764e-11	8.04204e-13	3.33491e-15	4.56734e-16	3.15224e-15	4.43183e-12	6.49306e-11	7.60293e-09	8.5127e-16	8.97558e-11	3.57141e-15	8.19858e-18	1.25212e-14	5.37989e-16	3.45014e-16	2.51057e-17	5.72483e-20	1.21077e-14	2.57705e-18	3.41755e-15	5.00199e-09	1.49288e-13	4.20239e-16	4.46482e-16	1.05757e-09	8.41999e-18	1.38269e-12
BIGC670101.lag22	6.72896e-14	7.25408e-10	1.52493e-11	4.9535e-14	3.78417e-12	2.07739e-14	4.37834e-11	8.67678e-12	5.71532e-12	2.773e-12	6.69478e-13	1.43891e-13	9.31889e-14	6.99991e-08	5.38939e-14	1.52481e-09	2.56387e-17	1.55086e-11	5.48272e-17	1.1583e-12	1.02221e-11	1.81888e-13	3.84486e-10	1.9042e-13	4.37254e-21	2.4166e-12	6.90797e-13	9.80654e-14	1.54097e-10	1.44196e-12	1.29796e-14	1.17358e-14	1.26116e-14	5.40936e-13	2.5301e-12	2.42079e-13	4.95824e-12	4.20134e-19	3.18095e-13	1.76344e-15	1.99522e-15	9.73859e-14	1.44555e-13	4.86294e-12	3.72705e-11	1.22491e-15	1.81721e-06	1.14656e-10	1.66701e-13
BIGC670101.lag23	3.43964e-12	9.66468e-10	8.26033e-13	3.98613e-12	2.25799e-11	3.13973e-08	2.84696e-08	1.3376e-12	9.56892e-13	1.79865e-15	5.09914e-12	2.55696e-13	3.18266e-14	4.63083e-10	1.63693e-14	8.63986e-12	6.81985e-18	4.47689e-13	4.98846e-14	4.2657e-10	4.07337e-11	1.19376e-10	4.70376e-10	1.41822e-14	2.13779e-18	2.85224e-13	1.98558e-14	4.15372e-14	4.57193e-11	3.2319e-13	1.18186e-19	3.08539e-08	1.10255e-14	2.74216e-14	1.05522e-12	5.70072e-14	1.27936e-13	2.01999e-15	1.71572e-11	3.07592e-15	1.54298e-07	5.32667e-14	4.16665e-10	3.29835e-11	1.48772e-14	1.64596e-12	6.18815e-12	3.61535e-15	6.61112e-15
BIGC670101.lag26	2.20139e-17	8.97061e-13	2.91122e-13	5.13074e-14	3.71389e-15	8.05242e-12	8.65356e-11	3.0397e-13	1.59423e-18	1.01235e-16	1.93928e-10	6.77017e-13	1.46903e-13	1.81204e-15	2.15794e-14	3.77169e-14	4.07508e-15	5.64925e-10	7.55171e-21	9.99001e-14	1.26563e-12	2.78808e-13	3.27885e-10	1.07115e-19	2.36775e-24	1.74291e-12	6.86174e-13	1.49128e-14	8.41402e-14	5.27966e-11	2.66206e-18	4.06673e-14	5.16956e-20	1.92725e-20	3.96744e-10	9.1607e-15	4.34192e-15	2.76659e-17	4.71695e-15	2.78139e-14	3.46089e-19	4.69458e-10	4.81333e-11	1.32626e-15	1.22245e-14	1.73145e-12	4.14967e-17	3.02927e-11	3.96032e-12
BIGC670101.lag27	7.86891e-15	9.79655e-12	2.00457e-14	1.07546e-17	7.88106e-11	5.14058e-11	4.00637e-07	3.29636e-16	2.15466e-13	4.05717e-14	4.71531e-11	1.53491e-16	3.81348e-09	1.04416e-11	3.98527e-16	1.22157e-11	4.17067e-16	2.56348e-12	2.293e-12	2.59216e-13	1.23981e-11	6.31585e-13	1.41076e-10	3.8134e-19	6.73991e-13	2.97943e-15	2.59216e-13	1.0209e-14	2.13818e-09	2.88785e-11	8.59179e-14	6.15687e-11	5.24572e-17	1.19652e-13	3.78058e-14	3.1334e-16	3.67052e-17	4.90726e-14	9.32182e-17	1.9326e-12	1.0769e-16	1.87814e-20	6.5738e-14	9.17107e-12	1.37225e-11	1.51633e-15	1.65937e-13	1.12156e-13	5.01539e-11
BIGC670101.lag28	1.32264e-20	3.08851e-17	1.49977e-13	4.12738e-13	2.8008e-13	2.74147e-11	7.74868e-12	5.44799e-16	4.53692e-20	1.03973e-11	1.29614e-11	1.19055e-16	5.16548e-12	3.3921e-14	4.32079e-15	1.30256e-12	7.95539e-25	1.31315e-15	4.04764e-14	1.45487e-17	5.68412e-23	1.03671e-13	1.14878e-11	1.82193e-16	1.03071e-17	1.30318e-13	9.61871e-18	7.30088e-14	3.01905e-13	9.01433e-17	3.94778e-15	2.51505e-15	2.50271e-15	6.67549e-15	1.14251e-15	9.23311e-22	1.0254e-22	1.78713e-18	1.42496e-16	1.27492e-19	8.45533e-20	2.23516e-22	6.02427e-16	1.41076e-10	1.0486e-11	4.976e-16	6.84192e-20	7.12636e-15	1.101e-13
BIGC670101.lag29	9.57016e-24	1.61365e-12	2.52223e-13	5.92271e-20	1.02812e-16	1.27936e-13	2.50261e-12	9.38353e-16	3.04591e-15	1.01845e-14	1.38548e-10	1.7135e-16	7.91e-21	5.11352e-13	2.26252e-15	6.52794e-14	5.31263e-16	2.24689e-14	2.24025e-16	5.20496e-17	4.51122e-20	1.80534e-12	2.33145e-18	7.31852e-15	1.94704e-16	3.28187e-14	4.29977e-15	1.96247e-11	1.1367e-16	1.24616e-12	2.16629e-21	5.04604e-10	7.6065e-16	3.04591e-15	1.58198e-19	4.32461e-18	1.15559e-18	5.56403e-23	1.35192e-14	6.54319e-14	3.11287e-17	4.0754e-19	9.59316e-18	1.24285e-10	3.54756e-14	2.93693e-14	9.56537e-17	5.25938e-17	1.66999e-09
BIGC670101.lag30	2.70933e-28	1.20105e-11	4.39735e-20	2.23677e-19	3.7223e-16	1.89342e-10	1.50322e-13	8.04204e-13	2.0767e-11	1.9326e-12	3.7961e-13	3.57098e-13	2.91122e-13	3.52276e-13	5.06683e-18	8.45789e-19	3.0895e-20	3.19019e-14	6.06984e-16	6.32807e-18	3.07975e-21	7.77449e-14	1.05757e-09	4.0417e-19	3.82717e-17	1.64952e-15	4.02177e-17	2.05057e-12	5.75563e-19	4.21589e-10	1.17194e-19	3.20161e-12	7.19565e-15	1.03071e-17	2.09725e-14	1.231e-16	1.98949e-19	6.43065e-16	3.09661e-17	1.06693e-17	1.04456e-15	1.48261e-13	9.5207e-15	4.30903e-12	2.98625e-12	3.27139e-16	4.44027e-19	7.50416e-12	4.36388e-14
BIGC670101.lag4	2.8102e-35	6.48731e-26	3.29814e-25	3.06433e-29	2.99405e-20	3.26535e-27	9.27718e-23	2.00527e-25	6.87294e-25	3.99631e-25	1.71285e-27	1.98059e-30	6.42288e-32	3.89739e-30	7.82407e-28	9.95434e-26	6.56833e-31	6.48339e-30	3.46433e-32	5.43247e-27	1.17021e-25	3.95801e-29	5.03928e-20	1.25453e-26	3.11782e-29	9.12405e-32	1.31692e-24	3.01436e-18	4.77629e-23	2.41629e-25	8.28326e-30	1.69021e-24	4.78771e-32	2.36994e-27	1.79513e-27	2.69687e-31	3.64382e-31	8.79468e-31	1.74385e-30	2.77939e-24	1.24115e-30	1.24031e-37	6.65161e-24	2.16318e-19	1.57376e-29	1.08781e-32	1.89285e-26	1.51861e-26	3.98759e-22
BIGC670101.lag5	5.44009e-14	7.88377e-14	5.94075e-12	3.40249e-12	1.71789e-16	9.03038e-11	1.57178e-09	2.87177e-13	3.75025e-11	2.24827e-12	6.07212e-14	9.96816e-17	5.19144e-17	2.80718e-13	4.79021e-13	7.74868e-12	2.1611e-18	8.35557e-14	2.59565e-20	4.18414e-11	7.40405e-13	8.1994e-16	4.29044e-12	1.44706e-16	3.5572e-17	1.02716e-13	2.29127e-11	3.88297e-13	1.38975e-11	1.16992e-10	3.33491e-15	4.41861e-10	2.73264e-20	1.8782e-13	3.36387e-10	3.16766e-14	8.85706e-18	4.03594e-16	1.87386e-16	2.7342e-15	3.10103e-14	7.42607e-17	8.33618e-14	3.43725e-09	1.7253e-19	3.01894e-12	3.66107e-13	5.14882e-15	2.43575e-14
BIGC670101.lag6	4.27416e-20	7.96166e-18	1.9228e-22	1.71107e-18	1.72106e-14	7.55171e-21	4.68952e-23	1.42168e-15	6.11181e-18	4.86863e-15	1.69402e-13	8.1343e-25	3.93496e-14	5.33332e-20	8.03679e-20	1.66596e-16	5.37228e-19	3.68872e-19	6.44763e-18	1.89437e-20	3.26181e-24	1.80938e-20	1.62169e-13	9.25326e-20	1.15145e-25	7.26018e-20	1.60939e-22	5.44799e-16	3.59326e-20	5.23252e-18	1.4612e-18	1.31992e-14	4.03688e-23	1.57913e-17	1.33549e-18	6.72141e-23	2.01877e-21	2.4242e-22	2.14516e-19	1.83555e-17	1.58002e-25	2.50921e-23	2.85586e-18	6.74467e-14	2.28084e-19	9.26979e-26	1.90228e-14	8.67037e-18	1.86193e-14
BIGC670101.lag7	7.46227e-29	9.77848e-25	4.19295e-33	1.30669e-32	3.18607e-32	1.52845e-31	3.68589e-24	1.98483e-33	1.02867e-29	5.56789e-34	1.39323e-25	7.1787e-36	4.93592e-26	4.35731e-31	3.13596e-28	3.42313e-29	1.71674e-29	1.34252e-31	3.48284e-29	2.06305e-28	5.29452e-36	2.19423e-25	5.58613e-24	1.03227e-29	6.51774e-35	1.87509e-38	6.03248e-28	1.62339e-27	1.20642e-30	2.19553e-24	7.24905e-27	6.3639e-21	1.4466e-36	4.19738e-29	4.95357e-29	8.18331e-34	7.00333e-31	1.22412e-33	5.28877e-35	6.25113e-35	8.83389e-28	5.97376e-32	3.34666e-33	4.88504e-31	3.41645e-31	1.27872e-28	1.23727e-22	1.3177e-29	3.02086e-28
BIGC670101.lag8	4.25242e-23	5.63234e-23	6.57038e-21	1.28302e-22	2.29387e-18	6.30871e-21	1.37944e-23	6.97862e-20	1.00914e-21	5.34846e-20	2.81784e-17	2.32577e-19	5.23252e-18	6.53968e-23	1.15989e-23	2.72334e-21	3.23772e-23	9.80654e-14	9.24907e-23	1.70706e-21	3.76014e-18	3.28801e-16	3.34881e-18	1.45292e-25	1.68489e-24	2.63206e-17	2.43186e-25	4.81074e-19	5.57076e-22	3.33833e-19	1.84045e-24	4.32276e-22	1.63179e-25	5.56493e-20	6.00484e-23	2.08879e-26	1.19699e-25	5.44242e-26	6.40817e-25	1.48111e-23	1.19789e-30	4.26014e-25	9.438e-19	5.25502e-19	1.28232e-21	1.80319e-25	3.08877e-21	6.56198e-22	1.17077e-14
BIGC670101.lag9	3.03476e-24	2.38909e-20	8.69349e-18	5.64323e-16	6.6208e-22	2.60508e-18	1.44706e-16	1.32279e-16	2.59857e-21	1.86147e-18	1.65613e-18	1.03639e-21	2.11731e-22	3.63235e-17	1.00714e-16	2.8791e-18	2.05423e-23	5.49213e-19	1.87276e-20	5.83069e-16	5.88389e-21	3.72983e-19	5.70094e-18	1.19313e-22	1.3031e-18	5.56493e-20	5.77368e-20	1.12799e-23	3.23798e-19	7.7109e-18	5.33067e-24	4.72587e-13	1.00387e-22	1.08345e-21	1.69256e-18	1.20267e-20	1.32228e-19	3.57502e-21	1.46557e-22	1.49257e-20	4.73046e-21	4.91852e-25	2.65673e-16	6.69167e-15	7.04744e-22	1.34283e-13	3.18153e-18	1.48828e-20	2.213e-17
CC	1.82381e-09	6.2326e-14	4.17947e-10	5.43728e-14	2.21217e-08	3.50683e-12	6.94731e-12	6.51003e-11	3.78179e-09	3.18439e-14	2.30631e-09	3.35751e-08	7.89099e-15	6.43609e-09	6.73452e-09	4.51693e-11	8.44021e-08	2.41282e-11	1.52035e-09	1.0111e-12	8.63859e-12	1.11901e-12	1.56354e-13	2.63543e-12	6.38854e-13	6.98989e-11	1.5738e-09	1.42569e-07	1.38259e-11	2.94693e-18	1.19694e-15	2.92037e-08	6.14537e-17	2.25327e-10	1.62896e-07	8.12674e-12	4.61368e-10	5.41342e-10	7.33018e-08	8.91963e-15	2.28785e-10	5.65324e-10	9.32324e-13	1.92731e-07	2.1805e-09	3.7727e-12	1.62159e-11	8.78765e-10	2.65767e-09
CD	9.0791e-12	9.49358e-09	5.151e-12	3.74052e-06	1.48106e-08	2.26474e-09	2.11525e-13	1.08277e-10	2.49923e-13	5.5672e-10	2.17651e-06	3.13251e-10	5.83848e-12	4.71884e-11	1.9073e-08	6.17801e-09	3.6144e-10	4.64856e-11	1.34699e-07	4.14922e-10	5.12722e-09	4.9075e-06	1.59232e-11	1.39253e-16	4.34724e-12	1.2869e-12	2.48257e-08	4.23239e-12	3.29615e-10	7.07703e-16	4.3092e-08	3.15294e-07	5.48093e-13	2.20616e-15	1.83791e-13	3.68225e-11	4.30343e-10	5.35193e-11	4.46299e-12	7.04317e-08	2.38568e-11	7.97962e-10	1.46456e-10	5.50732e-09	1.65727e-10	1.66762e-06	5.97402e-10	2.21706e-10	2.38054e-08
CE	6.2452e-25	1.42093e-20	1.46921e-19	4.34606e-17	6.20694e-12	7.92504e-14	1.26712e-18	1.39767e-16	5.41731e-18	8.18215e-16	3.52553e-15	4.61874e-11	9.8005e-21	4.0194e-16	3.56649e-13	2.52484e-09	1.08451e-17	1.16519e-17	3.87857e-18	2.26986e-14	2.17791e-22	1.83676e-19	8.46467e-23	4.08591e-15	2.59202e-18	3.40748e-17	8.88575e-13	1.03365e-14	1.22301e-13	6.88898e-20	9.06573e-16	1.36576e-14	7.71444e-23	2.63315e-12	1.06708e-13	6.16947e-15	4.76106e-19	1.42455e-12	1.34565e-14	6.22356e-17	4.88205e-16	7.56783e-13	4.12759e-20	3.06418e-17	3.48264e-15	1.73158e-12	4.44997e-17	2.00458e-13	1.2537e-08
CF	5.12009e-25	2.01538e-31	1.71619e-21	5.70485e-24	2.35092e-28	2.50447e-30	8.26939e-32	1.25189e-23	3.82261e-25	4.56818e-24	5.1241e-23	4.6667e-29	6.02398e-21	1.38575e-22	1.26735e-22	4.74331e-22	1.11321e-22	5.51438e-22	2.53724e-19	1.42715e-29	5.03304e-21	7.6371e-27	2.57996e-16	3.57841e-28	2.90505e-21	2.37664e-24	6.31167e-33	1.78646e-26	4.19433e-24	1.71028e-30	2.01963e-19	6.43774e-21	3.03563e-28	7.40461e-24	9.07395e-21	1.40242e-30	2.69111e-25	8.48772e-29	1.79733e-19	4.89473e-22	8.73273e-22	2.65353e-20	2.93773e-24	1.03585e-27	1.04515e-22	4.1114e-25	8.28013e-29	4.82324e-28	8.68796e-21
CFF	6.32344e-13	3.08734e-12	9.99519e-09	7.65441e-13	4.001e-11	7.90763e-13	6.9688e-12	3.98418e-11	3.71678e-10	2.99834e-12	1.06726e-09	9.02739e-12	1.18576e-11	1.22242e-11	2.63094e-12	1.41572e-09	1.83468e-13	1.77398e-13	1.24453e-10	2.65185e-10	7.26603e-12	3.20765e-12	1.16529e-11	1.09875e-11	4.10342e-11	1.757e-13	1.18061e-11	1.13904e-09	2.69096e-12	7.58354e-13	1.40362e-10	2.70897e-09	3.97536e-14	2.09843e-12	3.21269e-08	8.94786e-11	3.09429e-12	3.64643e-11	1.45946e-09	3.97536e-14	3.22503e-09	4.44496e-11	4.82179e-10	7.37476e-13	3.24187e-14	3.8395e-14	7.61889e-13	1.77398e-13	4.38716e-10
CFL	6.95745e-22	2.54235e-21	1.24924e-18	6.61778e-27	8.03188e-22	1.47813e-26	5.44389e-28	1.42342e-25	2.70856e-25	2.77957e-21	2.77658e-23	1.23941e-23	2.60656e-20	6.56792e-20	3.92339e-22	5.09665e-23	7.81173e-25	1.45821e-23	2.81402e-20	4.24966e-25	3.28081e-26	1.18773e-28	1.69224e-24	2.13993e-22	4.25993e-25	7.56462e-23	2.06296e-23	2.33519e-25	7.69309e-24	1.85121e-24	6.96906e-23	1.12162e-24	2.00763e-24	1.82008e-22	2.99106e-22	6.53815e-23	3.81362e-27	2.56085e-22	2.199e-19	2.23323e-22	1.81259e-25	9.83722e-20	5.94013e-25	2.53971e-26	2.97045e-25	3.67442e-23	2.5207e-24	2.2852e-23	1.56695e-23
CFS	7.33505e-10	1.48279e-09	2.81544e-06	8.01322e-11	1.08392e-10	1.263e-08	1.72241e-08	6.85785e-11	6.36886e-09	6.86821e-10	2.05533e-07	1.9257e-09	1.31233e-08	3.04773e-12	5.43174e-09	1.36403e-06	6.31471e-09	3.15226e-08	2.07779e-10	2.3227e-10	4.75044e-09	5.33935e-09	8.09099e-07	1.56528e-07	1.93253e-09	2.82033e-11	2.35053e-11	7.17609e-10	1.96707e-09	2.52075e-08	3.23472e-08	5.16985e-08	4.31872e-11	1.86521e-11	1.51607e-07	1.37075e-09	1.27152e-09	2.28541e-11	3.08474e-07	3.69163e-09	1.37491e-08	8.2068e-07	1.17462e-07	2.63902e-12	8.9476e-12	1.42611e-08	1.73121e-09	7.56524e-08	1.62833e-07
CGG	5.93786e-14	7.02815e-15	8.46174e-17	2.95422e-14	1.01372e-11	4.54235e-13	1.14792e-14	6.35831e-14	1.96283e-16	1.30107e-13	9.74054e-18	4.59973e-14	1.26745e-13	2.94949e-14	7.32202e-14	3.08255e-12	1.06283e-13	1.4215e-15	1.9783e-12	3.25711e-13	1.53036e-14	3.54991e-13	4.57345e-14	1.6546e-12	3.11054e-16	6.88051e-15	7.75848e-10	5.19007e-13	1.34716e-11	6.44339e-14	1.05247e-15	4.57593e-14	1.73389e-13	4.99737e-11	1.46539e-15	4.76023e-12	2.70906e-14	2.84814e-14	5.81643e-13	7.28783e-13	1.36754e-15	9.24711e-10	7.5991e-14	2.73851e-15	6.89121e-16	2.29444e-12	1.49638e-16	4.83495e-12	4.69736e-14
CHAM810101.lag1	9.68971e-24	1.5079e-27	1.1459e-19	1.19007e-26	2.44336e-21	7.5684e-22	1.24141e-20	3.80723e-17	2.44641e-29	2.04903e-28	1.76186e-22	1.4584e-23	5.01077e-20	2.14475e-23	8.41591e-29	1.71251e-23	7.58505e-25	4.48027e-27	5.6961e-26	1.08282e-25	4.44239e-18	9.3611e-30	4.23328e-22	4.93037e-24	2.33814e-24	1.13298e-25	1.24432e-25	2.11798e-25	5.15965e-25	2.44128e-18	1.53749e-24	5.3699e-17	3.95233e-33	3.7676e-24	3.91518e-23	1.01909e-26	1.60053e-25	2.56574e-28	1.70119e-30	1.21882e-23	1.12146e-26	6.11567e-23	4.82404e-19	6.4614e-19	9.08883e-21	1.06861e-24	1.66731e-21	1.61795e-27	1.99883e-25
CHAM810101.lag1.1	4.01503e-20	3.56805e-28	3.54382e-18	2.6606e-25	2.19189e-21	1.94013e-19	2.89325e-20	6.59204e-17	2.13033e-26	1.90088e-28	2.94322e-20	4.14895e-21	3.0324e-17	5.0581e-21	2.78215e-27	8.03152e-22	2.19189e-21	2.733e-26	2.29505e-23	3.1016e-23	1.48598e-17	1.07792e-26	3.04575e-20	2.3666e-22	1.43489e-22	8.91893e-25	1.03639e-21	4.80557e-23	7.84448e-24	4.71275e-18	3.18562e-22	2.72749e-15	5.84476e-29	6.46048e-23	1.99517e-21	9.02194e-24	4.78473e-22	4.17077e-28	1.74042e-25	1.12927e-21	3.84391e-23	3.70256e-21	2.96592e-18	2.67383e-17	1.69586e-17	1.2298e-22	4.14259e-20	1.69832e-26	9.50518e-23
CHAM810101.lag1.2	9.71019e-22	8.97673e-30	1.94013e-19	4.15029e-27	1.57099e-22	7.33598e-21	1.12593e-21	7.15572e-18	7.23975e-28	3.44584e-30	3.01825e-22	9.50518e-23	1.24063e-18	1.24478e-22	4.68758e-29	4.985e-23	5.63234e-23	1.07394e-27	2.65207e-25	3.53885e-25	4.37931e-19	2.28519e-28	9.79687e-22	1.37094e-23	5.94569e-24	2.61052e-26	2.40346e-23	7.34769e-25	4.54121e-25	2.39814e-19	5.13466e-24	2.46158e-16	6.97843e-31	4.6317e-24	6.70097e-23	4.02195e-25	6.02031e-24	8.97673e-30	5.08338e-27	7.56844e-23	7.44174e-25	2.25542e-22	5.18424e-20	1.56841e-18	2.16922e-19	3.67437e-24	1.25237e-21	6.09397e-28	1.83466e-24
CHAM810101.lag12	8.56167e-29	1.88795e-28	6.05734e-21	4.07371e-25	3.02842e-20	2.29059e-21	1.97197e-20	1.02463e-23	2.17116e-30	6.88714e-23	1.06986e-22	1.45487e-17	2.24514e-26	9.96414e-24	1.56458e-27	3.71133e-22	9.80954e-25	6.76383e-21	6.60683e-27	2.16806e-24	9.94305e-22	1.01256e-24	8.26114e-21	6.40352e-26	2.75618e-25	6.3708e-30	5.11096e-28	2.13033e-26	5.91773e-25	1.08345e-21	5.43144e-24	1.63798e-26	6.02875e-29	2.33064e-23	6.32416e-23	1.10695e-27	5.0136e-25	3.1207e-23	9.23981e-26	6.26101e-28	4.07193e-22	1.74991e-23	5.86006e-16	1.05301e-18	4.03483e-25	4.73122e-26	2.2753e-18	1.36441e-29	1.12751e-18
CHAM810101.lag12.1	3.17608e-22	2.20185e-27	2.99294e-17	3.56459e-21	3.60156e-18	2.42351e-20	3.8773e-19	7.25286e-23	2.16392e-28	6.49454e-21	2.41826e-19	6.07955e-13	9.07033e-22	1.03028e-21	2.4633e-25	1.97842e-19	1.98758e-22	1.8867e-19	7.11057e-22	3.84701e-22	1.21052e-18	1.38057e-21	5.13523e-18	5.48739e-21	1.78324e-22	9.19885e-27	1.70951e-22	6.70005e-22	3.92841e-22	2.66328e-20	9.09727e-22	5.11866e-24	1.73482e-25	9.70006e-19	2.77505e-22	7.05691e-23	9.54439e-20	7.19561e-22	2.07289e-21	1.40225e-25	2.618e-20	5.47112e-20	9.08409e-14	3.78721e-15	1.5335e-22	2.34172e-20	2.13787e-15	1.03822e-25	3.98653e-15
CHAM810101.lag12.2	8.04296e-23	1.27872e-28	3.1052e-18	5.25059e-23	3.9972e-19	5.28816e-20	3.61704e-21	3.70521e-23	6.82944e-27	1.74775e-21	5.34273e-19	4.98844e-13	4.34867e-22	1.60379e-20	5.45042e-28	1.35228e-19	2.38087e-22	3.56269e-20	5.12577e-20	1.94026e-22	1.01344e-18	8.83147e-22	3.09661e-17	3.28952e-20	9.26052e-22	3.43277e-27	1.2298e-22	3.00261e-20	6.33181e-22	1.02723e-21	1.25994e-22	3.16361e-25	3.04448e-27	1.0356e-19	2.85103e-22	1.29081e-22	1.36753e-19	1.03212e-20	8.83147e-22	1.20527e-24	2.31086e-21	1.02116e-21	5.74085e-14	1.32626e-15	3.82044e-23	6.6208e-22	5.01374e-16	1.39661e-23	5.16136e-15
CHAM810101.lag3	2.69829e-18	2.93787e-22	7.85051e-28	5.60406e-22	1.41252e-26	1.77662e-34	1.82591e-30	5.39525e-25	5.4798e-23	2.48532e-26	1.7178e-23	3.33208e-22	3.5499e-24	8.55312e-21	3.05387e-24	7.46814e-20	1.49091e-25	1.32284e-27	3.60649e-21	1.42654e-26	2.20185e-27	4.04766e-22	6.73074e-29	2.80379e-20	1.59183e-24	4.3357e-22	2.97701e-20	2.74735e-25	3.60444e-23	1.96664e-30	2.79534e-31	9.05832e-32	1.33028e-20	9.47633e-31	1.64007e-23	7.81975e-22	1.37704e-20	5.42198e-30	1.06543e-20	5.50729e-19	3.09244e-24	2.28218e-20	3.6155e-23	3.02638e-23	7.77099e-27	7.93187e-33	7.38731e-26	1.30079e-28	5.40817e-21
CHAM810101.lag3.1	1.46381e-32	2.867e-27	7.59745e-38	2.03087e-31	1.18819e-33	2.81305e-43	1.19231e-37	3.87999e-33	7.60101e-31	2.2812e-30	6.66763e-30	2.21072e-34	2.4107e-34	3.92199e-27	1.44039e-30	1.21385e-26	2.27856e-36	8.37328e-36	8.31228e-30	5.0925e-32	3.66151e-38	5.78467e-29	2.79356e-38	7.31344e-28	7.65128e-34	3.50315e-31	1.03047e-28	3.53285e-35	8.98431e-31	1.73691e-39	1.63593e-41	3.16163e-40	1.11464e-29	2.38206e-38	3.81732e-31	1.99464e-30	4.96818e-26	2.17562e-35	8.68008e-29	2.95635e-26	6.59178e-31	3.21145e-28	3.84294e-30	9.29052e-34	1.9014e-34	1.07176e-40	4.878e-33	8.43794e-36	3.70648e-29
CHAM810101.lag3.2	2.62205e-29	4.00911e-25	1.13868e-35	3.06222e-28	9.12405e-32	1.26965e-41	3.98885e-37	4.87543e-32	4.50896e-28	8.83038e-29	2.72697e-27	1.08458e-30	3.46573e-31	3.76535e-26	3.96389e-28	8.37019e-25	2.22743e-34	2.22743e-34	1.20641e-28	6.30419e-30	3.34338e-36	9.01433e-28	1.78437e-36	3.38054e-26	2.1255e-32	5.45558e-29	8.19352e-27	3.8779e-32	6.57487e-30	1.27232e-36	3.87866e-39	8.51726e-37	1.67312e-27	1.76169e-37	6.54799e-29	2.81995e-29	1.04064e-23	5.75836e-33	8.00593e-27	2.20245e-24	5.69547e-28	5.15137e-27	1.18999e-28	6.10512e-32	4.80513e-32	2.3051e-39	4.64677e-31	3.5241e-34	2.66396e-27
CHAM810101.lag4	3.93135e-19	6.11004e-20	3.05445e-20	7.6172e-20	2.39563e-14	4.89238e-15	6.11575e-16	3.27082e-20	4.96831e-20	1.5115e-16	1.46268e-19	2.16697e-18	4.1526e-25	1.62141e-17	4.55212e-19	4.1066e-17	2.74738e-21	1.74812e-20	4.97282e-19	5.52062e-18	3.43832e-17	2.01273e-16	1.17462e-13	2.41153e-19	2.93483e-20	1.19857e-19	1.0087e-14	3.89176e-13	6.23427e-19	1.43942e-15	5.54476e-16	3.73361e-22	6.37309e-19	5.1416e-16	7.81086e-19	1.82127e-22	5.23459e-23	8.72809e-16	3.93667e-21	1.89976e-22	3.8273e-16	2.38898e-18	1.46302e-14	3.59809e-14	2.0873e-14	1.2777e-20	3.41323e-19	1.25425e-18	1.88424e-14
CHAM810101.lag4.1	1.9854e-15	6.80335e-20	5.67686e-19	8.48756e-18	5.84925e-14	6.63543e-14	1.43942e-15	4.0417e-19	3.20738e-18	4.67218e-16	9.93059e-18	4.08504e-15	5.25312e-21	2.83095e-16	4.06664e-16	8.54203e-15	1.69659e-19	2.21815e-19	7.70435e-19	2.06474e-16	6.2679e-15	2.09725e-14	8.54137e-13	2.92318e-17	1.5899e-18	9.3165e-18	6.05671e-12	6.80537e-11	4.25932e-17	3.30607e-13	3.42473e-12	7.28071e-20	1.37259e-17	3.04661e-13	1.73662e-17	1.96192e-19	8.8577e-22	5.88482e-15	4.55212e-19	1.34182e-20	2.78139e-14	1.58547e-15	1.27406e-12	4.48965e-12	3.28364e-13	6.93004e-18	1.36753e-19	1.93492e-17	8.36781e-12
CHAM810101.lag4.2	1.5584e-17	1.32467e-21	8.55312e-21	1.32228e-19	4.85679e-15	2.45897e-14	1.06586e-16	1.63637e-20	2.30641e-19	1.78306e-17	2.33876e-19	7.60102e-17	7.56844e-23	6.71273e-17	5.24656e-18	4.4874e-16	7.95595e-21	3.09833e-20	3.14061e-19	7.31019e-18	1.20079e-15	1.49766e-15	1.15577e-13	1.57697e-18	9.8169e-20	1.29657e-19	9.19311e-13	3.60787e-12	5.49112e-18	4.62594e-15	1.4094e-13	1.66241e-21	9.54197e-19	8.96413e-15	6.37309e-19	1.14844e-20	8.21591e-23	4.45357e-16	1.25219e-20	2.00104e-21	1.9854e-15	2.17832e-16	1.9042e-13	3.07442e-13	5.22449e-15	2.50042e-19	5.1472e-21	2.46119e-18	1.34948e-12
CHAM820101.lag1	1.11582e-30	2.23151e-27	6.79821e-24	1.09697e-31	9.7893e-20	7.7765e-29	4.59446e-26	1.02873e-24	1.95279e-30	1.84539e-30	2.82395e-26	5.8273e-26	1.6759e-23	8.88899e-31	9.92447e-33	1.09663e-20	9.6372e-33	5.9615e-26	3.76269e-30	1.2536e-27	4.14259e-20	3.98601e-24	4.14563e-22	4.08181e-27	3.64222e-35	4.96473e-32	1.51819e-24	5.12737e-29	3.73092e-27	3.71287e-25	2.05244e-27	2.54026e-23	7.42599e-34	4.90259e-29	2.65146e-24	4.86004e-33	2.15141e-26	5.03372e-35	2.64075e-33	4.64716e-27	1.17709e-34	5.34914e-33	6.7672e-26	2.23035e-24	6.54799e-29	2.17258e-27	1.81668e-31	3.04626e-30	1.84429e-25
CHAM820101.lag1.1	2.30753e-15	3.30397e-18	1.44834e-12	3.30241e-15	4.17481e-10	3.23345e-18	2.32463e-15	9.00016e-14	1.58585e-21	3.97876e-18	2.9714e-13	4.33764e-13	5.07564e-10	6.76541e-18	1.1368e-18	5.12296e-09	9.89462e-15	5.74085e-14	8.23531e-17	6.67549e-15	5.34508e-11	2.52798e-13	1.33225e-11	2.18374e-14	3.83717e-17	1.57071e-16	3.77169e-14	6.13035e-17	1.5643e-14	3.05354e-13	2.68225e-13	1.96676e-14	6.13112e-16	2.30185e-15	5.70304e-12	1.46646e-17	2.77592e-11	1.24951e-15	5.2841e-19	7.98378e-15	5.05359e-20	3.85253e-15	3.45117e-15	4.30836e-13	5.32667e-14	7.87774e-16	6.6106e-16	1.32263e-17	1.27143e-15
CHAM820101.lag1.2	1.07137e-16	1.98949e-19	1.26761e-13	1.3537e-16	3.58336e-11	1.8296e-19	1.32279e-16	8.08076e-15	1.16458e-22	1.11414e-19	2.02374e-14	2.18893e-14	4.12414e-11	2.91371e-19	3.67605e-20	5.71552e-10	4.34259e-16	2.85773e-15	1.81651e-18	2.59664e-16	5.48646e-12	2.46481e-14	1.067e-12	1.23715e-15	1.18435e-18	6.91156e-18	2.20203e-15	4.32461e-18	7.56852e-16	1.21952e-14	2.96484e-14	1.55052e-15	3.88759e-17	1.56268e-16	6.06593e-13	9.38643e-19	1.86586e-12	9.06097e-17	3.55256e-20	8.83778e-16	3.03501e-21	1.1367e-16	2.34536e-16	3.38411e-14	3.90941e-15	1.6692e-17	2.00235e-17	9.03317e-19	1.03609e-16
CHAM820101.lag10	8.60309e-12	9.19675e-11	3.2711e-11	1.3607e-11	2.57537e-11	1.4045e-11	5.79009e-11	2.12615e-09	2.05283e-14	9.56667e-15	9.67231e-12	3.06839e-15	1.31492e-10	8.31442e-12	5.35167e-14	2.60778e-11	7.77714e-13	2.60808e-08	3.21726e-13	2.48048e-11	8.31036e-09	6.75502e-13	5.48682e-10	1.8782e-13	9.27385e-17	7.51188e-16	7.72041e-14	6.11753e-10	8.13884e-12	5.63443e-14	2.84799e-14	3.12041e-09	1.02179e-18	2.28799e-12	2.83904e-10	1.57058e-11	1.11587e-14	1.02797e-17	7.00667e-15	4.83358e-13	5.36607e-15	4.99279e-17	9.02107e-14	1.28595e-16	1.20763e-13	2.10737e-11	1.37715e-10	5.06575e-10	2.63868e-10
CHAM820101.lag11	8.99623e-20	7.23633e-17	2.72026e-18	2.83385e-19	1.13207e-14	7.53071e-16	4.96602e-13	6.34764e-14	2.94391e-23	1.37259e-17	1.00714e-16	2.84047e-18	5.31823e-20	2.21509e-14	8.55119e-19	6.21777e-21	9.79687e-22	2.36176e-14	2.45842e-20	2.3335e-12	5.65438e-22	1.22469e-16	2.46481e-14	2.33036e-15	4.25252e-14	3.19013e-18	1.66372e-22	1.89455e-17	6.76511e-17	2.68388e-16	3.86735e-17	1.05223e-16	1.27281e-16	4.13693e-23	1.36467e-13	1.87161e-18	2.0458e-19	3.89403e-18	2.01942e-18	1.92173e-20	5.53775e-19	1.22718e-20	4.56993e-15	4.68262e-15	8.55566e-18	2.1398e-16	7.62557e-16	8.49462e-17	9.19009e-14
CHAM820101.lag12	1.94937e-23	2.18624e-20	1.76926e-19	2.37086e-15	1.74445e-16	9.57433e-21	3.808e-16	9.23339e-19	1.51419e-20	1.73312e-20	1.53044e-18	1.62368e-21	4.36168e-22	3.1207e-23	5.48836e-22	3.01496e-26	2.1248e-25	3.47207e-21	3.48284e-29	1.0998e-20	4.32461e-18	2.58414e-17	1.12558e-15	4.41818e-26	1.93553e-25	8.43825e-26	1.44139e-28	1.03192e-13	3.02086e-19	5.92202e-27	8.00593e-27	9.84457e-20	1.02818e-25	1.62894e-22	2.49777e-24	4.25986e-19	1.06986e-22	6.04156e-23	2.80251e-19	6.54218e-28	3.20738e-18	2.01167e-22	1.93887e-14	3.61535e-15	2.17528e-19	6.36201e-18	5.05359e-20	2.5085e-27	4.16489e-18
CHAM820101.lag13	1.44909e-14	3.82196e-13	1.45953e-14	7.50333e-17	3.19543e-13	2.53954e-13	6.53298e-11	8.96733e-09	4.12875e-16	7.22071e-12	3.98613e-12	1.788e-14	4.43183e-12	6.64994e-13	1.08938e-14	2.30751e-13	2.98596e-16	2.91756e-08	1.51341e-10	2.32423e-10	9.03534e-12	6.13436e-13	2.25152e-10	6.56103e-16	1.58689e-14	4.06497e-11	9.96689e-14	6.03075e-12	1.32875e-12	1.12676e-13	7.66253e-15	6.52412e-09	3.229e-19	1.54406e-10	5.40533e-15	6.13524e-12	6.88123e-16	1.48844e-16	2.42992e-15	2.74402e-13	9.65926e-15	6.28311e-15	4.47029e-12	1.5137e-12	2.47994e-09	4.61011e-13	4.51578e-11	6.52912e-12	9.42651e-10
CHAM820101.lag14	1.6175e-14	7.11617e-14	7.61291e-10	3.21059e-11	8.96722e-10	5.03357e-13	9.26409e-09	6.33002e-13	2.19845e-10	4.55881e-15	1.12229e-11	2.6091e-14	9.23412e-11	2.10064e-12	3.81461e-20	6.0044e-17	1.13207e-14	2.52458e-12	5.98758e-14	8.00622e-13	4.047e-12	3.93467e-12	2.92337e-09	3.59533e-13	3.74513e-14	2.86517e-12	1.33356e-10	2.50127e-11	1.38827e-10	1.12433e-09	3.93602e-13	1.70511e-09	9.58185e-14	3.53087e-14	6.87518e-11	2.39972e-16	6.77017e-13	1.34951e-15	1.68261e-12	3.43725e-09	2.88871e-14	1.59502e-16	1.12004e-09	1.08579e-08	2.0826e-09	5.50413e-14	3.55483e-13	2.04796e-14	4.97764e-10
CHAM820101.lag15	1.32947e-24	7.44346e-15	2.14261e-14	6.2107e-18	2.12623e-18	4.56332e-18	8.50091e-15	1.69659e-19	2.14516e-19	1.18204e-20	2.99812e-18	2.73325e-19	1.97605e-18	4.94543e-19	1.35988e-19	1.35408e-23	1.12811e-17	7.19891e-20	2.98226e-22	4.07179e-13	1.24114e-17	1.90381e-15	1.57071e-16	1.52628e-18	8.44713e-22	1.82449e-19	5.16284e-18	3.35785e-18	1.1779e-18	2.14843e-15	9.24995e-17	2.30392e-16	7.35285e-19	9.53407e-23	5.58374e-19	8.80052e-24	2.15993e-21	1.30189e-25	4.63861e-14	7.99157e-20	4.48915e-24	1.22236e-19	9.20813e-19	6.60463e-18	9.02194e-24	2.62986e-16	5.70094e-18	9.27763e-24	7.09863e-18
CHAM820101.lag16	1.6697e-18	8.64958e-17	2.43045e-16	3.56158e-25	9.27385e-17	7.55296e-20	1.52386e-15	3.75055e-19	6.88344e-19	2.02491e-18	1.42817e-17	5.01412e-21	6.65934e-15	8.21345e-21	8.66925e-19	2.80993e-18	2.39019e-24	2.97213e-15	1.50423e-19	7.06842e-22	7.57844e-19	2.30633e-18	6.06494e-19	3.06177e-21	8.99978e-23	2.18388e-16	3.11287e-17	2.03592e-18	2.30641e-19	1.1665e-13	1.00623e-15	6.41453e-16	3.54382e-21	9.23311e-22	2.74046e-20	1.16548e-15	8.73992e-18	1.68211e-21	1.39826e-17	4.60272e-19	6.5738e-14	9.87793e-18	2.31568e-16	9.79945e-18	4.28418e-22	8.90667e-21	5.16756e-16	1.00615e-21	9.59006e-17
CHAM820101.lag17	2.35928e-11	8.37164e-13	9.82929e-14	6.61997e-14	1.20561e-07	3.23754e-17	8.50336e-13	9.58185e-14	5.37299e-13	1.50138e-15	2.00015e-15	1.69185e-19	1.17077e-14	3.78496e-10	4.89238e-15	6.90565e-15	9.19802e-16	1.20484e-13	4.02864e-14	2.95792e-13	8.75341e-13	3.49889e-13	2.75517e-14	9.86592e-17	2.35516e-20	1.21602e-13	4.27928e-13	1.58894e-12	3.61509e-14	5.5458e-12	1.89894e-12	1.0486e-11	6.16199e-16	4.5879e-18	9.99033e-15	1.28413e-15	3.43222e-19	2.8401e-17	4.46065e-12	9.22101e-16	1.80419e-20	1.42162e-14	1.03912e-13	6.64994e-13	1.13793e-12	1.70065e-14	3.66937e-13	1.61797e-13	1.78457e-08
CHAM820101.lag18	4.44724e-24	7.14485e-16	3.0072e-14	2.06154e-24	1.68309e-16	2.36336e-17	3.53664e-15	5.83538e-17	8.11163e-18	5.26065e-18	2.5153e-20	2.64357e-25	2.41205e-15	8.31828e-15	3.41145e-17	5.27307e-17	9.87231e-20	1.86961e-13	1.88044e-15	4.22219e-21	5.31735e-18	2.92647e-20	6.3381e-19	1.17129e-15	3.30798e-23	4.53888e-18	5.93276e-19	1.75505e-17	9.08439e-17	1.87161e-18	2.61385e-21	5.92782e-15	4.85609e-21	6.72685e-20	7.94046e-18	5.10935e-22	7.83233e-19	9.54401e-26	1.14514e-13	9.72665e-19	2.02471e-21	1.24553e-23	1.26004e-12	3.51426e-14	6.3381e-19	4.19764e-21	2.87441e-16	3.23834e-15	9.34714e-11
CHAM820101.lag19	2.31086e-21	3.16535e-16	6.30871e-21	1.39404e-24	2.26296e-14	5.40533e-15	6.77143e-12	2.52973e-20	6.62341e-19	5.66085e-14	1.0411e-20	7.58847e-18	4.81415e-17	7.16178e-17	3.62102e-18	2.44908e-16	1.35494e-24	1.09564e-17	7.15296e-22	4.6177e-17	5.34846e-20	1.90235e-18	2.15373e-15	3.78185e-19	1.21257e-25	1.36248e-23	7.78944e-19	2.12349e-16	1.45604e-14	2.88905e-16	7.48925e-20	1.4244e-17	2.65244e-21	9.26979e-26	3.0895e-20	3.84468e-28	2.31035e-22	8.59901e-23	2.12728e-19	5.89518e-22	1.53483e-25	3.6385e-16	5.11139e-15	7.2397e-20	4.48964e-19	1.60939e-21	2.03441e-19	4.60179e-20	2.00562e-22
CHAM820101.lag2	3.09833e-20	4.27732e-16	2.65286e-17	5.66572e-21	3.16773e-15	6.6578e-18	1.13908e-11	4.30397e-17	7.81318e-20	1.231e-16	4.17574e-15	6.28598e-19	4.75189e-17	2.60311e-15	8.00423e-18	4.65987e-15	8.96339e-22	7.23055e-15	8.76486e-19	4.12738e-13	5.0948e-14	1.55313e-14	3.88297e-13	3.26505e-19	3.87009e-22	1.1941e-18	7.30088e-14	4.011e-18	2.50606e-14	7.62233e-13	2.93854e-17	4.66238e-13	2.05578e-17	3.09782e-21	1.12213e-17	5.35596e-17	5.38908e-18	6.13434e-23	5.65532e-18	6.16213e-20	8.41808e-23	5.74519e-24	8.66925e-19	2.99294e-17	3.33838e-16	3.65138e-17	1.11831e-18	2.40132e-14	1.28231e-13
CHAM820101.lag20	6.21713e-19	1.38048e-13	3.89808e-14	7.15836e-20	1.14553e-12	3.24661e-16	5.32487e-13	6.85568e-15	4.6177e-17	1.64296e-17	5.78569e-15	2.55114e-13	6.53153e-15	4.94756e-12	2.67799e-14	4.19179e-16	6.84568e-19	2.62516e-17	5.99408e-16	2.5301e-12	5.09408e-18	3.00878e-16	7.29413e-11	9.08392e-16	1.32645e-20	2.72339e-17	1.1306e-18	5.26532e-13	2.12045e-13	2.9951e-08	1.60939e-21	4.57902e-13	2.63395e-14	1.11068e-16	7.88206e-13	7.9466e-20	1.6692e-17	9.3905e-23	1.41465e-15	6.67802e-17	3.68602e-13	2.92994e-19	3.19761e-16	1.35846e-12	1.16631e-16	7.73989e-17	4.92825e-17	3.28364e-13	5.11536e-10
CHAM820101.lag21	2.55044e-17	1.01393e-09	3.48515e-10	8.61788e-13	1.92413e-12	4.83317e-11	3.58892e-15	6.51514e-12	1.50668e-13	7.38388e-11	4.9928e-09	1.45953e-14	1.44217e-14	4.39643e-11	1.30733e-14	4.71695e-15	4.21012e-11	2.76912e-13	8.24375e-12	3.33964e-11	3.7814e-11	1.45256e-14	3.33964e-11	2.01012e-10	6.16241e-15	7.64403e-15	2.48431e-15	1.8583e-11	3.85997e-10	3.09927e-07	5.16693e-14	1.07801e-09	1.34593e-13	4.33164e-16	1.72005e-12	2.03499e-15	2.20746e-15	3.85726e-17	3.43105e-18	4.24504e-16	4.27044e-17	7.79929e-16	3.29074e-07	1.56807e-12	6.00916e-16	4.48171e-15	5.88455e-10	2.45532e-16	2.33347e-10
CHAM820101.lag22	2.00717e-13	2.0345e-08	9.81741e-12	5.86465e-12	5.04604e-10	5.55727e-13	8.34998e-12	5.55774e-12	4.26255e-11	9.89358e-13	1.24035e-10	5.30073e-12	5.82572e-13	3.72648e-07	3.13791e-13	3.21059e-11	1.21581e-15	5.19573e-10	1.86974e-17	3.99882e-13	7.82136e-10	2.20665e-11	1.63813e-11	1.07582e-13	7.85741e-20	6.88923e-11	1.38682e-11	1.72146e-13	1.78763e-09	4.84312e-11	7.16608e-14	3.25397e-13	8.57186e-14	4.9419e-14	1.4194e-11	1.17733e-13	5.34888e-13	2.59664e-16	1.20615e-11	1.02954e-13	1.67248e-14	1.81888e-13	4.6383e-11	1.0395e-09	9.15881e-10	1.99343e-13	4.74638e-06	1.31808e-08	1.08612e-12
CHAM820101.lag23	2.17912e-11	8.78716e-08	1.87819e-12	2.15662e-12	6.54798e-09	2.46604e-09	9.53589e-09	3.99477e-12	2.56465e-11	1.36493e-14	9.69437e-11	8.83179e-13	3.12369e-13	7.14278e-10	3.80061e-12	8.5314e-11	3.3308e-18	6.02935e-15	4.85541e-13	6.0116e-10	4.5453e-09	2.11621e-11	7.53586e-11	9.63301e-13	1.11323e-17	4.183e-10	2.46605e-15	4.81605e-14	1.01978e-09	5.11352e-13	1.27149e-18	1.53146e-08	7.10914e-15	2.02563e-13	2.87142e-12	2.63153e-12	1.63512e-12	1.08407e-17	1.74458e-10	2.0873e-14	2.01659e-08	8.16361e-14	1.0057e-07	9.83278e-11	9.56667e-15	1.10341e-10	5.71532e-12	5.45284e-14	1.5204e-12
CHAM820101.lag26	1.12415e-13	1.03157e-09	3.00639e-10	2.51173e-11	1.68627e-10	3.02424e-10	5.38108e-10	2.05077e-11	1.93222e-15	1.81888e-13	1.45139e-09	1.34073e-11	1.42613e-12	1.74171e-14	8.00622e-13	7.71563e-12	5.58195e-14	8.02876e-09	3.8858e-16	1.04482e-10	1.33356e-10	3.93467e-12	1.63969e-10	1.86637e-14	2.84964e-19	1.48634e-10	3.83929e-13	2.81998e-13	2.29803e-12	1.48484e-09	7.25307e-16	4.89936e-13	3.02086e-19	4.89319e-18	8.90681e-08	2.48626e-12	4.09024e-13	9.56537e-17	1.15845e-13	4.56871e-13	1.02547e-16	3.70409e-10	4.20629e-09	4.89238e-15	7.98837e-13	3.00628e-09	7.49764e-15	5.81425e-09	1.98124e-08
CHAM820101.lag27	2.23624e-14	2.66274e-09	6.37734e-14	1.72037e-15	3.95732e-09	1.06616e-10	9.24402e-08	2.73054e-17	3.58336e-11	6.64207e-12	1.64158e-11	2.33344e-16	1.64745e-08	1.14393e-08	7.2839e-14	5.89599e-10	1.03609e-16	6.19478e-11	1.09896e-10	6.54459e-16	1.35211e-11	1.34704e-10	3.93285e-11	3.28801e-16	1.27331e-14	7.90702e-15	2.62579e-12	2.99173e-13	6.75385e-08	3.45104e-10	1.29109e-12	1.60397e-10	2.71413e-15	9.03076e-13	8.06963e-12	2.31279e-13	2.0858e-15	1.56596e-15	1.71612e-15	2.00405e-11	1.44909e-14	1.4258e-18	5.21019e-12	6.58659e-11	7.58204e-11	2.80718e-13	7.95277e-13	3.02927e-11	9.44463e-10
CHAM820101.lag28	7.01495e-17	7.81196e-13	4.48965e-12	4.22598e-12	1.33624e-10	5.32441e-09	5.24658e-10	6.25492e-12	8.1994e-16	6.39659e-10	1.7744e-11	2.13505e-13	3.36147e-09	1.10564e-10	1.49627e-11	4.37473e-12	9.87231e-20	7.6667e-14	2.7912e-12	4.86637e-13	4.53692e-20	1.87004e-11	1.43767e-09	7.62233e-13	1.1597e-15	1.06464e-12	1.62524e-14	4.047e-12	9.25286e-11	8.43953e-12	2.87831e-13	2.63983e-13	1.61365e-12	4.1635e-14	1.93388e-11	7.66023e-17	7.05589e-19	1.00974e-16	9.55966e-14	2.01787e-16	2.90029e-17	4.85609e-21	2.52223e-13	2.10625e-09	2.42189e-12	8.35557e-14	1.55052e-15	2.36915e-11	7.87e-09
CHAM820101.lag29	1.30021e-19	6.04451e-11	5.9313e-13	2.93405e-18	2.58033e-12	4.06456e-12	1.89477e-12	3.8714e-15	5.52995e-14	2.89143e-13	5.34974e-10	5.72744e-14	5.51129e-17	1.31997e-12	1.45953e-14	2.03366e-11	2.51859e-16	4.74338e-16	2.53954e-13	1.88828e-16	9.93059e-18	1.43937e-10	2.4281e-18	1.39132e-14	3.68388e-14	1.98419e-12	1.38575e-12	2.14661e-10	5.41848e-15	7.62851e-11	5.2841e-19	4.85299e-10	1.74587e-14	1.06838e-13	3.73826e-17	1.0083e-13	1.08407e-17	4.78837e-20	1.11166e-15	1.49627e-11	2.25224e-14	9.03867e-16	3.64196e-15	2.98987e-08	8.44666e-13	1.73385e-11	1.32134e-13	1.71789e-16	1.0074e-07
CHAM820101.lag3	3.02592e-13	1.06205e-11	3.85997e-10	3.35065e-10	2.26271e-11	5.39156e-10	2.42682e-08	2.92337e-09	7.26492e-09	2.41133e-12	1.36887e-10	1.14046e-12	4.58449e-14	4.68629e-11	8.08804e-14	1.63867e-09	2.72535e-13	3.42047e-13	2.37864e-14	5.44471e-11	2.47994e-09	3.38774e-12	2.63106e-08	2.02889e-17	1.93426e-14	3.07185e-14	4.18414e-11	7.35806e-09	1.08353e-10	3.62733e-09	1.37731e-13	1.2624e-06	4.05638e-16	2.62007e-12	2.59162e-12	8.94884e-16	1.53468e-14	2.10596e-13	2.47413e-16	6.95598e-15	5.65634e-17	1.62524e-14	1.24881e-09	7.06779e-12	6.77764e-11	1.87089e-10	1.16838e-15	1.90099e-10	4.74889e-12
CHAM820101.lag30	7.53361e-24	6.55974e-11	3.25453e-17	1.74e-16	2.38902e-11	1.69303e-10	6.66782e-11	2.23684e-09	2.14234e-10	2.13809e-10	4.69404e-15	3.33964e-11	3.52277e-12	6.16948e-11	9.11666e-15	3.7223e-16	1.96059e-17	2.68373e-12	8.95065e-13	1.09726e-14	1.20871e-19	2.73007e-11	6.04419e-08	1.08221e-18	3.73173e-16	5.83882e-13	1.85736e-15	6.64064e-11	3.17515e-14	5.81386e-11	2.66682e-17	1.01787e-11	2.73156e-13	1.28094e-15	1.40072e-08	5.56891e-14	7.43702e-16	5.96638e-18	7.35207e-14	1.50322e-13	1.50561e-14	2.49364e-13	7.0376e-12	5.64925e-10	6.34958e-12	3.46731e-13	2.86713e-16	1.29239e-09	1.51949e-10
CHAM820101.lag4	4.5795e-26	1.63144e-19	9.91487e-19	7.00343e-21	2.47664e-13	5.35748e-19	2.69756e-16	2.047e-18	2.87757e-17	5.2841e-19	5.58072e-20	4.67182e-22	1.95452e-21	2.39608e-23	3.67026e-21	1.54262e-19	3.79007e-21	1.34041e-21	8.39254e-23	8.65001e-22	1.19231e-20	3.03641e-22	3.99091e-14	1.80673e-17	7.91317e-22	5.39764e-24	5.477e-19	4.42226e-12	4.44906e-15	3.85234e-18	4.34766e-20	9.66453e-17	2.92259e-24	2.05725e-19	1.68796e-18	2.99864e-23	1.09018e-23	1.4857e-23	8.0954e-21	1.66181e-15	9.68971e-24	2.2046e-29	1.22538e-14	1.2273e-13	1.43056e-22	5.54708e-23	2.86358e-18	1.25012e-19	1.75041e-15
CHAM820101.lag6	3.511e-17	4.6729e-13	3.93617e-18	1.67834e-15	1.38548e-10	1.98086e-14	5.28892e-18	9.67231e-12	8.40907e-13	2.80951e-12	8.76268e-10	5.58335e-17	4.26962e-13	9.19802e-16	1.25334e-16	3.97179e-13	5.14882e-15	8.57676e-16	8.13951e-15	1.09518e-15	5.13523e-18	3.44141e-16	8.72413e-11	1.26419e-14	3.96381e-22	1.10339e-15	1.5946e-20	6.87518e-11	7.83842e-16	3.405e-13	1.5428e-16	5.38509e-13	2.96853e-20	4.44666e-14	5.37912e-15	4.03228e-17	1.5388e-18	1.21383e-18	5.97361e-14	6.90565e-15	7.43411e-19	1.79416e-19	5.12384e-15	3.09059e-10	2.63655e-16	6.6137e-20	9.65176e-12	4.34192e-15	1.44649e-08
CHAM820101.lag7	1.22716e-18	4.72651e-14	4.12034e-18	2.59378e-24	1.42227e-19	4.51456e-18	1.12935e-14	3.59786e-19	1.10614e-15	1.26726e-21	3.8244e-15	2.21129e-21	6.02935e-15	1.86739e-20	3.26306e-17	4.55212e-19	7.49031e-14	1.72978e-18	1.03304e-18	2.30633e-18	2.22431e-21	3.09544e-13	3.20677e-15	2.95581e-16	1.4159e-25	7.36872e-22	1.61168e-18	9.56667e-15	5.56837e-19	7.1828e-14	3.89564e-16	1.5643e-14	1.89603e-23	7.40687e-17	6.93318e-16	1.74812e-20	1.5317e-20	9.17854e-22	8.96607e-24	2.66883e-22	6.52405e-17	1.84285e-21	9.41095e-20	1.41034e-18	5.67686e-19	1.02179e-18	2.81358e-13	6.96066e-17	1.12506e-16
CHAM820101.lag8	1.97094e-17	2.05011e-15	1.31829e-13	4.60569e-17	1.55241e-13	1.6175e-14	2.10731e-16	2.99408e-15	9.6116e-13	1.13986e-13	4.28261e-14	2.13505e-13	4.41668e-13	3.1755e-15	3.48357e-17	1.48289e-15	1.38532e-16	6.3747e-11	9.91691e-17	3.87978e-14	2.68373e-12	1.29888e-11	1.08854e-12	7.7109e-18	8.94884e-16	1.58481e-10	8.43472e-19	7.08294e-12	2.01501e-15	2.90928e-14	9.49165e-17	6.71083e-16	1.07416e-19	2.3988e-13	1.62542e-13	1.55868e-16	1.65054e-20	6.16599e-19	3.08043e-17	5.98199e-19	9.33542e-24	2.38482e-19	1.58721e-11	2.05772e-14	2.63383e-13	4.11733e-17	1.44223e-13	2.07002e-16	3.30675e-07
CHAM820101.lag9	9.86073e-19	4.56993e-15	1.63291e-13	5.49516e-13	3.8244e-15	5.18779e-12	2.89026e-12	9.57239e-10	4.53426e-17	4.00031e-14	4.69336e-14	4.16557e-15	1.6577e-15	1.29395e-12	1.55088e-12	8.20863e-12	4.06413e-19	5.66085e-14	1.52372e-14	1.58054e-11	1.52386e-15	2.1326e-15	2.51201e-14	2.14422e-17	1.26761e-13	3.67775e-15	2.90011e-15	2.65479e-15	9.51543e-14	2.24001e-13	1.26802e-18	3.03196e-08	4.25577e-16	5.33162e-18	3.405e-13	8.96413e-15	1.58154e-15	3.30472e-16	5.93415e-16	5.9313e-13	3.17876e-17	1.76326e-21	1.1204e-12	9.77573e-12	1.68309e-16	3.32437e-10	1.57556e-14	1.47814e-17	1.23457e-11
CHAM820102.lag1	4.06429e-34	2.73027e-33	3.11266e-31	8.98431e-31	3.01668e-32	1.64233e-33	1.76246e-30	4.61719e-28	5.60985e-36	1.12245e-29	2.93044e-30	2.59915e-34	5.75662e-31	8.74502e-28	2.16947e-34	7.04682e-28	7.99041e-33	3.47816e-31	3.40072e-35	3.56198e-26	2.62652e-32	6.45233e-31	1.194e-26	1.79986e-28	4.87083e-37	4.59965e-34	3.04646e-31	6.74425e-35	2.22883e-32	6.85111e-25	1.57499e-32	1.65019e-38	1.11944e-33	2.95367e-34	2.16653e-36	1.17709e-34	2.18175e-24	3.69074e-38	5.50571e-34	6.47872e-33	2.12196e-38	3.85646e-41	1.91736e-31	2.46909e-26	6.40651e-31	7.71001e-31	1.10689e-29	7.69421e-27	1.2147e-28
CHAM820102.lag10	1.64807e-24	2.50812e-20	3.28018e-17	2.32159e-16	1.08246e-16	1.29472e-22	4.33533e-20	2.9773e-17	2.885e-20	5.55231e-25	2.8596e-22	1.63168e-20	3.42402e-16	2.33876e-19	2.97345e-21	4.0417e-19	2.89612e-21	6.46509e-22	6.76541e-18	4.70298e-21	1.84135e-18	1.49504e-21	1.70343e-15	2.1347e-21	2.58755e-23	5.17724e-21	2.05469e-21	1.67023e-16	2.11062e-17	2.15905e-15	2.45842e-20	1.09224e-26	1.97356e-23	2.46091e-22	1.35494e-24	2.01395e-18	1.89019e-23	1.55346e-21	3.29264e-24	7.1678e-21	6.89479e-29	2.98006e-28	1.23784e-20	4.89869e-21	1.95276e-14	9.75004e-24	2.59552e-23	2.62156e-19	3.36216e-22
CHAM820102.lag11	1.94834e-33	1.15019e-29	1.00571e-26	1.79513e-27	4.17757e-24	2.54532e-24	5.96426e-24	2.76199e-24	6.94535e-26	1.14561e-23	7.0054e-25	2.49798e-33	2.32183e-30	3.76239e-23	5.16285e-29	7.02307e-28	9.11298e-31	1.40911e-22	2.6554e-32	1.00318e-21	5.71607e-33	1.18273e-29	7.905e-25	2.80908e-30	1.02104e-30	4.43261e-26	2.01163e-27	2.11095e-22	5.98289e-24	1.85008e-27	2.31365e-30	1.12102e-23	1.19598e-27	1.87912e-29	2.5638e-23	2.30632e-29	4.18291e-29	4.51743e-32	2.44753e-25	7.23427e-34	3.37603e-27	1.36367e-33	3.88293e-25	1.75767e-32	3.07193e-20	8.41324e-27	1.80487e-22	6.88714e-23	2.1945e-27
CHAM820102.lag12	1.43889e-35	1.94722e-35	1.60669e-36	7.01903e-38	1.02955e-32	5.45618e-37	8.95466e-33	3.63028e-33	3.5354e-39	3.54622e-37	1.61585e-32	5.1933e-38	9.30894e-35	8.55826e-34	1.51592e-45	4.30675e-39	2.13467e-43	6.17738e-36	1.81936e-36	2.80465e-32	1.04179e-38	3.55682e-36	4.54772e-33	1.06367e-36	5.90495e-35	1.56967e-45	1.96625e-36	3.16129e-29	5.25651e-41	1.11528e-33	1.24912e-31	3.83207e-39	2.30424e-44	9.82514e-34	2.87925e-30	2.79682e-40	2.37006e-31	6.20214e-44	2.25743e-37	5.46134e-40	2.58996e-38	6.84288e-44	2.14333e-31	5.52058e-37	4.98405e-30	1.19086e-36	2.61696e-32	2.50872e-38	1.28889e-34
CHAM820102.lag13	1.86235e-28	2.74735e-25	1.70391e-26	1.75623e-30	1.37126e-26	1.90088e-28	4.83999e-16	1.26787e-24	6.07048e-25	5.43144e-24	3.36213e-25	2.48832e-28	1.06753e-21	3.06486e-27	1.40094e-23	1.92302e-34	6.23934e-32	6.89767e-27	5.06653e-27	1.12021e-32	5.93661e-25	2.01174e-25	3.47082e-29	1.33597e-25	1.51073e-37	2.11118e-25	1.47098e-24	6.30696e-25	1.44545e-26	2.94391e-23	6.23032e-24	7.97948e-27	2.26977e-34	4.5795e-26	7.74531e-27	2.49164e-30	7.36035e-29	4.48054e-22	1.24014e-31	1.4159e-25	4.91096e-32	9.21068e-31	5.94912e-19	4.88388e-34	1.04313e-29	7.64344e-27	1.30907e-31	3.30918e-27	1.24939e-27
CHAM820102.lag14	2.89737e-31	3.04448e-27	4.30477e-23	8.62517e-23	5.71535e-21	6.23915e-26	7.1678e-21	4.19261e-25	1.27538e-26	7.96582e-29	1.18759e-18	4.2008e-32	9.38308e-27	2.20838e-25	1.0302e-37	5.76691e-27	7.15131e-30	1.52496e-25	1.28103e-25	7.92164e-23	1.02486e-25	9.00339e-26	2.39019e-24	5.44841e-24	1.73849e-32	8.80145e-26	2.17376e-20	5.22853e-20	4.51298e-29	6.09264e-21	8.27567e-26	7.11857e-28	6.1947e-30	1.41949e-27	5.40711e-26	7.07709e-33	3.64437e-26	1.33236e-30	1.02463e-23	2.26988e-32	3.18424e-34	1.31276e-24	5.63756e-22	2.08879e-26	1.40506e-20	2.97032e-29	1.16423e-27	1.45128e-28	2.46693e-27
CHAM820102.lag15	3.76928e-35	5.59721e-27	3.76838e-27	5.93136e-28	7.53698e-25	5.88516e-29	1.18e-27	6.19785e-28	1.44824e-25	4.21609e-32	7.39428e-24	2.44325e-36	1.97748e-33	1.19521e-19	8.72494e-27	4.75272e-29	2.22316e-26	1.06523e-24	5.3579e-32	3.17376e-25	6.52961e-26	1.37724e-27	3.12532e-28	3.35909e-23	2.405e-28	3.78367e-35	1.03143e-27	4.4757e-21	6.34792e-24	5.11733e-21	1.20087e-25	4.21341e-28	7.64378e-35	5.26381e-34	4.88504e-31	1.42761e-29	5.37808e-25	7.18612e-32	1.43056e-22	4.10039e-31	5.43139e-35	2.23698e-32	1.18791e-32	5.96834e-23	6.72337e-26	1.08864e-26	3.82133e-25	6.40352e-26	1.18819e-33
CHAM820102.lag16	7.99421e-23	2.77536e-31	1.53831e-19	6.45436e-28	9.24887e-24	3.94818e-21	6.48019e-23	3.04502e-23	4.48915e-24	1.47975e-20	2.38804e-22	9.35469e-28	1.52887e-22	4.03483e-25	1.42221e-31	2.08294e-33	3.60883e-26	4.67494e-18	2.24648e-27	1.13326e-22	1.12146e-26	3.22404e-22	6.07341e-28	1.72815e-20	2.40519e-26	1.51725e-28	1.90738e-28	2.30009e-18	9.28413e-19	1.63431e-17	1.02548e-24	1.00841e-25	2.05673e-29	1.55741e-29	4.76401e-25	1.60455e-34	7.51796e-27	1.11119e-28	4.80513e-32	1.28568e-31	3.28234e-24	3.68025e-26	2.64055e-18	8.41093e-26	4.47935e-23	7.10849e-32	1.51027e-25	3.10798e-33	3.6266e-23
CHAM820102.lag17	9.80279e-36	1.50369e-26	3.48963e-32	3.3297e-29	2.23035e-24	1.06641e-28	3.54964e-23	7.38787e-28	4.10367e-36	6.18031e-35	6.16383e-21	1.95214e-31	1.90487e-32	1.70629e-24	1.54124e-29	5.69547e-28	5.46877e-33	1.42221e-31	1.41133e-25	2.66818e-24	6.67615e-28	2.89906e-23	4.06535e-30	2.07513e-31	2.21906e-34	1.8386e-35	2.52395e-29	1.63168e-20	1.16033e-27	1.29494e-29	1.20215e-30	6.61544e-25	4.9949e-34	1.64273e-41	1.36917e-29	3.71649e-26	7.26135e-34	2.82895e-30	3.69636e-31	7.20119e-27	6.83985e-34	2.38017e-32	4.28524e-29	1.50284e-27	3.39182e-21	8.27261e-29	1.02145e-23	4.19915e-28	1.89908e-26
CHAM820102.lag18	6.16017e-31	1.09357e-23	3.24574e-25	1.0862e-22	1.32228e-19	8.16603e-21	5.11733e-21	2.06418e-25	6.01212e-28	3.58473e-27	4.79903e-22	6.51981e-27	5.86143e-25	5.34303e-27	5.93956e-30	3.89722e-28	3.49491e-29	5.3608e-27	3.22781e-23	1.27913e-27	4.29686e-24	4.68009e-31	2.81139e-23	3.56158e-25	1.69256e-28	1.48892e-26	4.24655e-25	1.27101e-21	4.85396e-24	5.39525e-25	1.66482e-20	1.4584e-23	1.41474e-27	1.9388e-29	5.34734e-24	6.08128e-27	1.62654e-25	8.4e-34	2.80974e-25	2.33045e-29	6.57056e-29	2.15916e-29	4.79452e-25	3.44584e-30	3.78551e-23	1.16829e-18	2.8425e-26	2.64353e-19	9.97795e-23
CHAM820102.lag19	3.95233e-33	4.24109e-29	3.68653e-20	1.8521e-24	7.20883e-25	2.52591e-33	3.14765e-22	7.58164e-26	1.78885e-33	2.21663e-27	8.65141e-23	6.27984e-26	3.23424e-30	6.72141e-23	3.84585e-25	5.33716e-26	5.09369e-28	1.76868e-25	1.57186e-24	1.44493e-23	7.0054e-25	4.712e-28	1.76516e-29	1.04186e-24	3.40964e-30	5.90241e-27	8.44486e-29	2.06692e-23	1.48892e-26	1.21293e-24	6.97151e-23	1.84338e-28	2.46122e-33	2.25426e-28	1.4854e-32	1.47289e-27	4.12855e-28	7.67991e-34	1.36715e-22	1.04862e-32	2.00491e-27	1.98761e-30	4.04775e-25	2.2659e-25	9.9025e-24	7.09457e-28	2.18175e-24	6.59357e-26	5.2336e-36
CHAM820102.lag2	2.58938e-34	4.59208e-38	1.29468e-40	2.08108e-41	5.71195e-38	7.67952e-44	9.72774e-36	2.8753e-35	1.75554e-43	1.03445e-35	8.97091e-38	5.36337e-45	3.39648e-42	1.23323e-41	4.90177e-44	2.29436e-44	7.19806e-43	6.89711e-33	2.98918e-38	6.12995e-36	8.54461e-44	6.7699e-35	1.20955e-36	2.28077e-42	7.22852e-43	1.41703e-40	5.35614e-36	1.2505e-34	1.29228e-36	1.44996e-35	3.06142e-38	7.26209e-36	4.20145e-44	1.00893e-38	1.58656e-32	1.37157e-43	1.15382e-31	1.85666e-42	3.92546e-40	5.41703e-40	1.55725e-40	8.988e-42	5.01168e-42	2.12099e-34	9.5779e-31	1.36005e-40	1.54801e-38	1.25334e-35	6.18031e-35
CHAM820102.lag2.1	3.05454e-11	2.6351e-11	1.8568e-13	2.92999e-14	4.95485e-13	1.44638e-19	2.74147e-11	1.14514e-13	2.93787e-22	2.91555e-12	8.79288e-15	4.43115e-16	1.50202e-14	2.03041e-18	1.03077e-16	6.24401e-18	5.11577e-16	5.27732e-10	5.25938e-17	2.15194e-11	3.01436e-18	3.74799e-10	1.35841e-14	1.3194e-16	1.32955e-15	1.09518e-15	2.48626e-12	8.93771e-14	1.4051e-10	2.41274e-14	1.49026e-15	7.74248e-13	8.98379e-19	2.3284e-12	7.33887e-11	1.18959e-17	1.54812e-09	9.19009e-14	2.07043e-15	3.52073e-16	6.14843e-12	2.15373e-15	3.1755e-15	1.46245e-09	4.72217e-10	5.00579e-17	4.23731e-15	6.59062e-13	6.18212e-11
CHAM820102.lag2.2	3.80885e-12	2.67204e-12	1.33263e-14	3.0088e-15	1.93497e-13	2.59096e-21	1.48067e-12	1.20787e-14	5.42986e-23	6.64994e-13	5.47547e-16	4.70011e-18	2.18582e-15	2.24928e-19	2.94994e-18	5.67686e-19	5.80515e-17	3.21726e-11	5.65532e-18	7.70796e-13	2.43468e-18	7.30901e-11	9.96245e-16	1.49339e-18	1.07967e-16	3.17045e-17	7.03278e-13	6.90565e-15	1.60401e-11	1.68666e-15	9.81519e-17	1.09086e-13	8.77094e-20	5.95799e-13	2.26745e-11	3.24218e-18	2.88998e-10	3.13683e-15	1.07091e-15	1.27786e-17	1.29395e-12	1.09246e-15	2.56383e-16	2.39402e-11	4.27135e-11	2.31418e-17	1.86432e-16	3.71876e-14	1.53784e-11
CHAM820102.lag20	2.45668e-31	1.60175e-27	3.04425e-25	2.82078e-21	8.26672e-20	3.03476e-24	3.64147e-28	7.53698e-25	9.65968e-24	1.39965e-33	1.42194e-22	2.39383e-27	3.45877e-26	6.06114e-27	4.85235e-27	2.26967e-28	2.29037e-29	2.41603e-33	1.45268e-29	2.33066e-27	6.61531e-31	7.72565e-32	1.00741e-27	1.39403e-26	2.80465e-32	4.0457e-26	5.41248e-25	1.78896e-24	9.63719e-26	5.2955e-22	4.02773e-31	2.11004e-32	8.51765e-31	5.92285e-26	1.45313e-32	6.61746e-35	1.01992e-28	3.20938e-39	2.57449e-28	1.40787e-26	1.73474e-29	1.15613e-30	1.2245e-24	2.58327e-28	3.65621e-22	1.0555e-28	3.3648e-27	5.51685e-24	1.48644e-28
CHAM820102.lag21	7.4347e-22	3.93667e-21	2.82078e-21	1.61716e-24	1.27854e-21	2.67311e-19	6.94801e-24	1.28544e-18	2.76854e-23	8.71888e-24	3.65981e-15	8.88401e-22	4.7186e-25	9.23311e-22	1.95539e-23	9.80954e-25	8.13918e-19	4.52818e-21	6.52084e-20	6.3639e-21	7.4282e-18	6.24401e-18	1.93442e-22	1.06236e-20	1.30525e-28	1.1094e-21	5.86682e-21	3.54834e-19	9.24943e-15	1.30752e-19	1.1367e-22	1.8194e-19	3.74407e-24	2.34292e-26	6.57038e-21	4.63497e-21	3.40818e-24	7.12815e-26	7.3484e-24	5.46865e-27	3.46366e-23	2.44339e-24	4.35516e-19	3.19779e-26	1.83137e-18	1.3872e-17	2.27051e-21	6.30321e-20	2.39731e-26
CHAM820102.lag22	3.44937e-25	3.39766e-30	3.3426e-21	1.38888e-16	2.35716e-17	1.40486e-22	4.59043e-16	2.01877e-21	1.39299e-20	7.66033e-20	6.72685e-20	1.35736e-20	2.32836e-20	5.86017e-22	1.36248e-23	4.08181e-27	3.80116e-21	7.03652e-19	2.30636e-14	4.13083e-20	1.63601e-19	8.32087e-17	5.77147e-23	3.86833e-21	6.32816e-27	1.66241e-21	6.29042e-21	1.32966e-17	1.50833e-21	1.13854e-20	2.47413e-16	4.24401e-18	1.40094e-23	2.92747e-26	2.77505e-22	5.8053e-27	3.75003e-20	2.36994e-27	2.96476e-21	5.2955e-22	5.04627e-23	1.92956e-24	4.67966e-19	2.45109e-24	7.52797e-18	2.32638e-17	1.10285e-21	1.22716e-18	5.13992e-22
CHAM820102.lag23	1.60521e-15	8.92174e-17	5.94908e-16	3.35534e-16	2.13505e-13	9.15498e-17	6.40138e-13	7.92614e-15	1.51015e-13	1.0202e-16	2.76697e-16	6.16599e-19	2.35134e-16	5.27307e-17	2.53277e-11	9.07259e-20	1.41404e-16	6.67549e-15	4.35364e-14	2.05959e-12	8.46498e-18	2.20721e-10	8.24051e-16	3.29338e-12	6.26074e-18	5.49213e-19	1.38975e-11	7.99688e-16	4.03594e-16	3.679e-12	1.37118e-16	1.92394e-19	2.98945e-23	8.75715e-23	1.42496e-16	1.63152e-12	9.18293e-19	2.68434e-14	3.35534e-16	1.73112e-16	3.90453e-18	1.24692e-16	7.96452e-15	6.39845e-16	6.1069e-13	3.15224e-15	1.4719e-15	2.11689e-15	3.66937e-13
CHAM820102.lag24	1.3491e-08	1.66945e-11	1.05586e-14	5.02279e-12	2.05057e-12	2.89656e-12	1.43767e-09	6.31312e-09	5.47832e-11	2.89143e-13	9.70968e-09	3.42375e-11	1.16595e-11	2.07056e-07	2.80339e-12	1.0486e-11	3.37614e-14	6.11995e-09	3.78496e-10	6.88167e-08	5.14328e-12	1.03425e-08	7.50333e-17	1.31268e-11	2.19414e-14	7.09812e-12	2.04762e-09	5.36079e-08	3.24033e-10	2.70594e-08	8.12524e-11	4.09868e-11	1.28558e-14	4.04427e-13	1.15585e-10	5.78127e-14	4.07336e-12	1.61426e-13	1.76414e-09	3.32676e-15	4.8004e-12	1.44555e-13	1.55695e-09	1.54434e-11	1.69642e-10	8.85672e-15	5.77708e-12	1.02975e-12	2.40876e-10
CHAM820102.lag25	5.94569e-24	7.81975e-22	1.01732e-20	3.35138e-25	3.55902e-22	1.95452e-21	4.82797e-18	1.01064e-13	5.94214e-26	1.52005e-25	3.83216e-23	1.02914e-20	6.6208e-22	2.13158e-23	3.76069e-25	7.98933e-31	1.12774e-24	2.42807e-24	4.91544e-17	8.65141e-23	1.989e-20	3.14663e-28	8.01102e-28	2.13652e-22	1.9067e-27	3.34067e-25	1.85671e-20	7.94059e-19	9.19885e-27	1.69205e-21	2.5274e-25	8.14242e-21	3.91518e-23	8.24092e-23	6.70097e-23	1.47429e-26	1.32228e-19	8.33017e-27	1.16316e-21	3.32211e-22	2.54151e-29	1.57186e-24	1.85554e-23	1.85629e-27	9.51915e-21	6.3208e-26	4.62906e-25	1.87619e-19	1.69832e-26
CHAM820102.lag26	1.88152e-28	2.85103e-22	3.07473e-26	1.01235e-16	1.57473e-16	2.06373e-18	2.60547e-22	5.38089e-29	2.56786e-27	5.61893e-28	1.09518e-15	1.22445e-27	9.54401e-26	5.41248e-25	6.51981e-27	2.85903e-30	7.79627e-21	7.44708e-20	1.21893e-19	4.09635e-22	7.55708e-24	9.38449e-20	2.82548e-22	4.90464e-19	2.93962e-29	9.04514e-29	9.26705e-18	3.17876e-17	1.07882e-24	5.10246e-21	2.50148e-18	1.27528e-22	1.29946e-29	3.5499e-24	4.43577e-29	7.6135e-22	1.46706e-25	1.59025e-25	1.15175e-20	1.9459e-30	3.83165e-27	9.39314e-29	5.02962e-25	3.16081e-20	7.29714e-23	1.10695e-27	3.92859e-26	2.50563e-24	6.80042e-22
CHAM820102.lag27	2.43855e-19	3.89962e-24	1.89437e-20	1.69138e-17	6.94045e-19	1.20978e-15	1.18301e-15	6.51342e-21	1.36753e-19	2.72334e-21	1.65658e-14	9.5921e-23	2.1536e-21	3.63824e-21	1.7276e-28	1.31276e-24	1.78862e-22	3.40672e-16	7.59092e-22	4.29853e-20	1.45103e-17	7.2385e-22	9.8471e-15	2.17133e-23	9.95434e-26	2.29522e-25	2.78783e-20	4.35981e-21	7.70435e-19	7.98381e-17	4.91372e-16	8.46498e-18	9.38255e-21	2.10956e-19	9.5921e-23	1.29081e-22	7.87362e-23	2.62922e-21	7.13816e-20	3.92841e-22	5.20454e-18	5.90597e-20	8.60802e-30	1.23353e-22	5.94239e-17	1.8756e-24	4.13886e-17	1.46449e-21	3.8134e-19
CHAM820102.lag28	1.8246e-28	4.16163e-35	4.91852e-25	8.1085e-25	1.94337e-23	9.08883e-21	6.78433e-27	3.29238e-22	1.16423e-27	2.16891e-22	5.34846e-20	5.11761e-33	1.17266e-30	1.75126e-22	6.32816e-27	1.76665e-26	6.34917e-27	7.17738e-27	6.04156e-23	5.62078e-22	1.00083e-22	1.04064e-23	1.34977e-27	4.06825e-27	1.48281e-27	6.99277e-23	2.83843e-27	7.68198e-20	5.21863e-23	2.57653e-26	1.04874e-21	6.00146e-22	3.09491e-26	2.79358e-28	3.64543e-30	1.0665e-33	3.71287e-25	1.59594e-31	1.70091e-24	1.19699e-25	1.97163e-27	4.712e-28	5.03935e-24	2.48347e-27	3.26181e-24	5.98694e-31	3.0848e-26	5.80804e-22	6.11489e-24
CHAM820102.lag29	3.86753e-23	1.15885e-19	3.07162e-19	2.06664e-17	3.07975e-21	1.91125e-22	4.85395e-18	1.24774e-17	8.55785e-24	2.76353e-21	4.69261e-19	2.05452e-22	1.43456e-21	1.17194e-19	1.5804e-23	1.82128e-21	8.59884e-22	2.73934e-21	2.62631e-18	7.04066e-15	1.05846e-17	6.62783e-21	1.82665e-21	6.9292e-23	2.09197e-22	4.38488e-20	2.26816e-19	1.6322e-16	1.14707e-22	1.90257e-19	3.83638e-20	7.16771e-24	2.79445e-32	5.9354e-21	2.8057e-24	1.50002e-19	1.05619e-19	1.30518e-27	4.02195e-25	2.24331e-20	6.84533e-23	3.53728e-27	1.34462e-25	5.40817e-21	1.85138e-18	7.46468e-21	4.59025e-23	1.37518e-23	1.81579e-22
CHAM820102.lag3	5.23272e-22	2.2517e-16	2.81661e-16	1.31217e-17	1.44555e-13	2.41847e-14	4.29977e-15	4.38443e-14	1.57553e-23	3.8714e-15	3.58719e-13	2.25721e-21	1.4493e-18	3.16192e-21	4.59464e-21	1.52299e-24	3.29636e-16	1.12217e-16	8.66291e-16	4.50207e-19	1.72508e-18	1.89324e-14	1.21529e-16	1.5461e-17	3.06385e-22	6.42335e-17	2.99408e-15	6.10056e-14	4.44234e-16	1.46228e-13	6.96413e-22	2.50581e-16	1.66372e-22	7.82589e-23	8.05949e-20	2.76854e-23	2.7483e-20	5.49654e-23	3.72983e-19	1.80474e-23	3.92048e-19	2.75844e-22	6.29042e-21	9.59579e-22	1.95426e-11	4.50245e-18	4.52405e-20	1.14318e-17	1.03947e-21
CHAM820102.lag30	1.68108e-23	2.12728e-19	4.17611e-18	8.25791e-28	3.46489e-14	2.65487e-18	5.74107e-20	1.41805e-18	7.06842e-22	2.06072e-22	1.15538e-17	7.19891e-20	1.80527e-21	1.6175e-14	1.18112e-18	2.91313e-21	2.27674e-27	2.45054e-21	3.24342e-22	5.17724e-21	2.7958e-20	5.17724e-21	2.5193e-25	1.47916e-19	1.44796e-22	3.86272e-18	4.91298e-21	1.63638e-16	8.55785e-24	8.48756e-18	1.80666e-18	2.46546e-20	1.53525e-21	3.21792e-23	1.43026e-19	1.66559e-23	6.33898e-20	1.10612e-21	3.63796e-19	2.75333e-24	4.34867e-22	1.53525e-21	1.29624e-20	2.30845e-20	3.16192e-21	1.83204e-21	7.11057e-22	1.81808e-14	5.80515e-17
CHAM820102.lag4	6.74525e-26	3.76239e-23	1.98347e-21	4.71583e-26	6.23984e-16	9.46411e-20	3.42961e-24	2.61152e-23	1.74764e-27	5.1105e-25	6.86128e-20	5.1027e-24	7.53239e-32	5.38872e-33	6.78986e-28	2.09255e-23	1.52766e-28	7.19561e-22	2.18935e-29	4.65872e-25	4.97679e-24	8.35777e-27	1.32691e-29	2.31259e-18	2.80078e-27	1.76718e-22	4.26249e-26	7.77844e-23	1.89836e-33	5.13466e-24	3.14348e-21	4.03688e-23	4.4908e-26	3.32833e-23	3.26129e-29	1.37724e-27	1.08912e-24	3.71851e-27	3.28759e-25	1.88152e-28	6.53175e-25	6.67285e-27	1.27959e-26	7.19297e-19	1.58498e-26	1.34462e-25	4.43869e-30	8.24896e-22	6.65077e-27
CHAM820102.lag5	7.40604e-30	2.68323e-30	4.15029e-27	1.05795e-30	1.30862e-24	3.08263e-23	5.04193e-19	7.99421e-23	6.58497e-27	2.67657e-24	9.13744e-23	3.99851e-24	3.62074e-27	3.20441e-25	4.74744e-31	5.28529e-26	4.2043e-31	2.50563e-24	1.9697e-22	4.37674e-30	6.17859e-26	4.52086e-22	1.9439e-20	5.41451e-24	8.59701e-35	3.62861e-24	1.89405e-22	7.4542e-23	2.23151e-27	2.6481e-20	5.04976e-26	1.37522e-19	1.10009e-30	4.80894e-26	9.88432e-22	6.4553e-27	1.01344e-18	3.49774e-34	3.60156e-18	3.21145e-28	5.89599e-23	3.53135e-29	5.67201e-27	1.18544e-25	2.93489e-23	2.52937e-24	2.83843e-27	3.95432e-26	5.75043e-25
CHAM820102.lag6	9.59991e-24	1.6388e-22	7.42087e-14	1.37092e-25	2.43907e-17	4.67494e-18	4.80198e-20	6.97283e-15	5.37503e-22	3.55256e-20	2.23094e-14	4.6485e-21	1.6788e-18	8.60502e-17	2.01174e-25	7.21928e-20	6.59357e-26	1.99708e-17	1.05006e-17	5.95267e-21	1.18204e-20	5.82437e-18	1.33411e-20	3.01119e-20	6.07042e-29	7.9843e-19	2.12728e-19	5.40703e-16	5.64928e-21	6.81941e-24	6.07337e-22	1.20267e-20	4.43845e-23	2.65244e-21	2.25151e-24	1.11578e-20	2.89612e-21	2.90462e-21	1.20767e-22	2.09759e-18	9.83022e-30	1.2949e-17	3.60658e-14	2.38207e-17	2.78798e-14	3.03451e-25	9.24907e-23	1.2258e-19	1.18952e-22
CHAM820102.lag7	3.94905e-32	1.92538e-29	1.37395e-29	8.53232e-29	5.14032e-20	1.04186e-24	1.83635e-18	3.25615e-25	2.15848e-26	5.16851e-27	5.78952e-26	9.93375e-30	2.28519e-28	3.01174e-29	2.16533e-27	5.96563e-31	2.30235e-33	1.44941e-23	5.15965e-25	1.05174e-25	6.67615e-28	1.5946e-20	5.64685e-29	1.9388e-29	4.88288e-35	6.96631e-29	1.12912e-34	2.20129e-25	1.189e-23	3.30798e-23	1.15783e-28	2.00037e-29	2.6112e-31	2.19398e-33	1.32324e-28	2.88042e-28	1.03198e-30	2.77153e-29	2.20842e-22	3.00363e-30	2.81015e-27	2.06388e-29	1.06641e-28	6.3708e-30	1.01087e-29	2.44641e-29	7.6821e-25	6.90814e-23	9.51358e-28
CHAM820102.lag8	4.70387e-23	1.9228e-22	2.23516e-22	1.68628e-23	5.36398e-23	5.3768e-21	1.0533e-26	1.83228e-22	1.80527e-21	1.18398e-21	7.72554e-19	3.33208e-22	6.53291e-19	2.19936e-14	2.04859e-24	3.88743e-24	8.80145e-26	4.99934e-18	1.00387e-22	2.28084e-19	1.89437e-20	9.71019e-22	8.17398e-20	3.46265e-20	5.41451e-24	2.42807e-24	5.2955e-22	7.95595e-21	6.14596e-21	2.93085e-17	1.03143e-27	1.56426e-26	2.20245e-24	8.66743e-27	4.16849e-29	1.27913e-27	1.14268e-19	3.64543e-30	2.45577e-23	9.16749e-28	1.82128e-21	1.3466e-30	1.71261e-25	9.87182e-24	2.52251e-20	1.10404e-25	7.19561e-22	4.61488e-20	1.43429e-25
CHAM820102.lag9	5.16535e-37	5.53409e-24	1.11002e-24	5.37863e-27	7.56559e-29	5.02517e-28	6.38274e-26	5.96679e-29	6.52961e-26	1.43868e-27	1.07986e-32	1.39025e-30	4.41252e-25	3.64e-24	1.56829e-29	2.97204e-30	3.2735e-35	7.69421e-27	3.09631e-29	3.47883e-27	6.6471e-21	5.63234e-23	3.76838e-27	8.95879e-27	2.3395e-35	4.34673e-26	1.86381e-24	1.87912e-29	2.65981e-24	2.52469e-23	1.8371e-28	2.7781e-26	1.10676e-26	2.1437e-27	4.66263e-27	1.0447e-28	3.93708e-28	2.18699e-26	1.12245e-29	1.3356e-26	1.25364e-31	9.5953e-35	1.49102e-33	2.2048e-21	2.51917e-31	2.61908e-26	1.53874e-26	2.55971e-26	1.05044e-29
charge.Group3	6.3495e-12	3.80895e-13	1.11542e-12	1.88963e-10	5.48461e-15	2.08077e-07	8.98991e-08	2.30083e-11	1.2716e-09	5.61634e-10	4.47024e-12	4.96404e-11	7.63041e-17	1.26799e-09	9.9423e-17	1.25016e-13	9.59657e-11	9.46626e-18	6.031e-09	3.15319e-12	3.47483e-10	2.46295e-15	5.03262e-16	7.06032e-10	6.1568e-11	4.92696e-13	3.09602e-11	6.43704e-14	3.90451e-15	9.94668e-10	2.12062e-11	4.08173e-11	8.44319e-14	3.23183e-14	7.8364e-10	1.54078e-16	9.11483e-10	6.20112e-10	1.511e-14	2.45471e-11	9.04057e-09	8.40222e-11	6.12052e-13	8.62133e-12	1.64788e-10	2.46298e-15	2.32847e-08	4.76422e-12	2.26831e-14
CHOC760101.lag1	9.69828e-27	3.29264e-24	2.59977e-19	1.20865e-25	1.12217e-16	4.12429e-23	1.61303e-20	2.90152e-20	2.06056e-23	1.14212e-24	8.79569e-20	2.58987e-22	5.26842e-21	5.06182e-25	2.67287e-27	4.59226e-15	1.89908e-26	3.0002e-22	1.54236e-24	5.02874e-21	1.05365e-13	3.4437e-22	3.44733e-17	1.4612e-18	8.38546e-27	4.73369e-25	1.25363e-19	6.11489e-24	3.32311e-21	3.21535e-20	7.00566e-22	1.98658e-17	4.60104e-27	8.1427e-24	1.0144e-17	1.29769e-25	5.05587e-19	2.18616e-28	2.4505e-27	5.39108e-22	2.99585e-25	4.58493e-25	1.04144e-19	3.1518e-20	7.78039e-25	9.82776e-23	1.34664e-22	1.062e-25	1.7447e-19
CHOC760101.lag10	9.55404e-10	8.4624e-09	2.12637e-08	6.96688e-09	7.38132e-10	2.85864e-09	1.17941e-08	8.00519e-07	2.37554e-10	3.52277e-12	5.07564e-10	7.25168e-12	2.00564e-09	2.66825e-08	8.54823e-12	4.22186e-09	1.4194e-11	6.15332e-07	6.91741e-11	1.49104e-08	1.13124e-07	4.51884e-12	1.99367e-07	1.23288e-10	6.02523e-13	5.54479e-13	8.13884e-12	3.37398e-09	7.73801e-11	5.86169e-11	3.44425e-10	3.07426e-09	1.18491e-14	2.22518e-11	1.66808e-08	9.6224e-09	6.0942e-11	2.021e-13	2.58399e-15	2.0752e-10	9.79655e-12	4.5379e-13	6.4798e-11	1.11792e-12	2.89622e-09	1.73068e-10	4.34116e-07	1.77921e-07	2.68273e-09
CHOC760101.lag11	1.16033e-16	3.48511e-15	9.01613e-16	9.56768e-18	8.64568e-15	2.548e-14	1.20585e-10	2.68497e-11	9.45466e-22	6.56325e-15	2.373e-14	9.49165e-17	6.28598e-19	5.58195e-14	9.8882e-16	6.26765e-20	6.00714e-20	7.2839e-14	1.10312e-18	1.22298e-10	2.78783e-20	4.56734e-16	4.74889e-12	1.78582e-13	2.93782e-13	1.53468e-14	1.5273e-20	1.46826e-15	2.34764e-15	1.45557e-13	7.86545e-14	1.04394e-13	9.24943e-15	3.34208e-22	8.33437e-13	2.97943e-15	1.05766e-16	2.41357e-17	2.81047e-17	2.71054e-19	2.56387e-17	7.72554e-19	3.50598e-14	7.37101e-13	7.30084e-15	4.28895e-13	1.7125e-12	8.65186e-14	2.48796e-13
CHOC760101.lag12	2.10368e-19	2.24928e-19	5.46849e-17	2.51076e-13	1.94704e-16	1.25083e-18	8.61788e-13	5.94908e-16	1.08984e-17	2.33344e-16	5.00113e-16	4.71275e-18	2.32515e-18	7.51043e-20	1.22236e-19	4.47935e-23	8.50376e-21	2.75728e-18	9.35374e-25	1.00197e-16	1.31223e-13	1.12664e-14	1.84867e-14	2.54962e-19	3.58221e-18	9.65771e-21	4.62906e-25	5.81445e-12	4.09502e-15	7.59092e-22	2.84047e-18	4.73953e-17	5.1472e-21	3.74606e-21	2.96853e-20	1.14251e-15	6.39845e-16	2.47963e-19	1.49226e-16	1.87135e-22	3.77896e-13	1.08404e-20	3.13162e-11	2.13312e-12	1.53836e-14	1.00874e-15	7.23492e-16	3.7448e-22	3.57273e-14
CHOC760101.lag14	1.83985e-13	2.96484e-14	3.5245e-11	5.45589e-11	2.51617e-10	1.42786e-10	9.59358e-08	4.14119e-11	2.03992e-09	3.06745e-13	3.46731e-13	1.47709e-14	2.293e-12	1.39269e-11	4.30143e-18	5.20454e-18	6.65093e-14	1.02063e-12	6.42216e-14	9.47141e-14	2.21127e-11	9.81741e-12	2.16376e-10	3.65073e-11	3.30773e-12	3.22395e-11	4.81242e-09	3.2762e-13	1.7856e-12	1.35518e-10	1.10069e-12	1.02369e-09	6.67061e-12	3.66877e-15	1.53173e-10	9.9425e-17	4.9369e-12	2.82981e-15	6.87712e-13	9.14096e-11	1.12125e-14	1.23427e-20	1.268e-09	3.13973e-08	3.05144e-09	1.48603e-13	2.1378e-12	2.14483e-13	3.25954e-10
CHOC760101.lag15	2.10976e-21	6.16194e-13	7.93293e-12	6.07212e-14	4.91625e-15	3.22252e-15	6.53181e-13	1.36493e-14	2.73771e-17	3.81718e-17	6.61112e-15	3.94896e-17	1.01378e-15	6.76511e-17	4.47725e-19	2.35685e-18	2.64177e-15	1.01981e-17	1.29955e-18	3.24672e-10	1.70343e-15	5.26659e-12	1.51538e-16	2.47066e-14	1.6178e-19	3.8858e-16	3.03845e-15	5.65744e-16	5.51694e-16	1.05586e-14	1.99505e-14	1.03912e-13	1.55822e-15	6.74424e-21	2.52994e-14	2.50096e-20	6.3406e-17	1.00997e-22	1.82724e-13	2.44286e-16	1.05917e-19	3.93523e-16	1.01113e-14	6.76151e-16	1.05301e-18	1.09086e-13	4.45357e-16	6.57751e-16	3.33491e-15
CHOC760101.lag16	2.05011e-15	1.32439e-13	8.44666e-13	2.05469e-21	7.42548e-15	4.49896e-17	3.45163e-13	4.77939e-16	1.73112e-16	1.9998e-14	5.25349e-13	7.55765e-19	7.02254e-12	3.0225e-18	6.8179e-17	2.18946e-16	1.98949e-19	9.56892e-13	4.89319e-18	2.67311e-19	9.11666e-15	1.96201e-16	4.93854e-16	1.48527e-18	2.09402e-17	9.04203e-14	2.97213e-15	1.84065e-16	1.85278e-15	1.05306e-11	1.97833e-10	1.25306e-13	4.30143e-18	3.70482e-15	2.80311e-17	6.57587e-13	8.37164e-13	2.97394e-18	2.81661e-16	1.06293e-15	8.71131e-09	8.7717e-15	3.0646e-14	3.22046e-14	4.83999e-16	8.52777e-19	2.34373e-12	1.73013e-19	2.85474e-14
CHOC760101.lag17	9.9598e-13	3.74513e-14	7.23317e-14	1.36416e-16	3.67347e-11	8.19858e-18	5.43166e-15	4.25038e-13	9.40575e-14	5.88482e-15	6.74735e-18	8.90667e-21	5.4543e-17	7.01692e-11	2.59035e-15	7.51188e-16	8.2424e-18	8.00423e-18	6.29836e-15	2.00717e-13	4.71953e-16	1.03574e-14	1.9854e-15	6.17756e-18	9.19457e-21	4.13671e-13	7.21682e-16	2.42395e-15	7.01495e-17	1.33507e-11	1.48394e-12	9.29602e-13	3.86621e-16	2.42195e-21	1.43229e-16	5.01277e-18	7.17861e-20	8.57848e-18	8.35557e-14	5.70864e-20	8.10509e-20	5.17796e-17	4.40672e-13	8.06127e-15	3.13787e-14	8.28645e-18	3.10248e-13	1.9903e-15	2.40668e-09
CHOC760101.lag18	3.81508e-24	6.90379e-14	3.35137e-13	8.41808e-23	7.85622e-18	2.69756e-16	1.46565e-13	1.59449e-14	2.33344e-16	1.70343e-15	2.21815e-19	1.66045e-23	4.73144e-16	2.82981e-15	6.96802e-16	2.86252e-17	2.14359e-18	1.47004e-14	2.28132e-13	1.49687e-20	4.91951e-18	9.41618e-18	4.95396e-17	2.26296e-14	1.12873e-20	8.29823e-15	1.99229e-16	2.52745e-15	1.62521e-15	4.8568e-20	1.18186e-19	2.40606e-12	9.72158e-18	7.91932e-18	1.1367e-16	3.54246e-20	9.02107e-14	4.41095e-21	2.46537e-13	1.34026e-17	3.46265e-20	1.01213e-21	1.93542e-10	3.4681e-15	3.36238e-18	2.1988e-20	2.09156e-13	9.63301e-13	1.85293e-09
CHOC760101.lag19	1.07387e-21	4.75189e-17	6.08167e-19	4.17923e-25	1.77525e-14	4.59226e-15	9.85925e-12	1.47319e-18	1.82589e-17	8.33618e-14	4.56276e-20	9.26716e-16	2.41826e-19	3.32151e-16	2.79473e-19	4.61364e-16	1.32645e-20	2.36324e-18	5.03606e-21	1.03912e-13	8.95189e-18	1.73205e-17	3.79843e-14	4.32647e-17	1.97765e-21	6.72141e-23	7.64944e-18	4.70548e-15	2.63395e-14	1.74445e-16	8.30856e-18	1.90851e-15	9.15137e-22	1.22438e-25	8.22046e-18	5.69086e-27	2.81754e-18	1.19807e-21	6.9197e-20	5.17067e-22	1.27143e-22	5.93415e-16	5.78569e-15	6.52084e-20	1.03163e-15	6.52084e-20	6.77078e-19	2.14987e-17	5.4248e-20
CHOC760101.lag2	2.548e-14	1.66054e-14	2.11914e-12	6.30281e-16	8.24192e-13	2.05508e-12	1.06163e-06	3.59823e-11	3.61984e-13	1.02336e-14	3.84446e-11	1.04394e-13	2.12064e-11	1.27439e-11	2.93115e-13	1.03222e-10	3.63235e-17	1.99416e-10	4.60606e-14	8.16022e-10	5.79381e-10	3.29835e-11	1.00426e-09	6.33284e-14	3.19892e-15	4.72845e-15	6.44019e-11	4.79021e-13	1.19065e-09	1.64489e-09	2.93467e-12	1.86716e-10	8.05052e-14	2.47782e-17	8.57954e-13	3.91663e-11	2.021e-13	1.68338e-18	4.32306e-14	1.82242e-14	9.31653e-15	1.16033e-16	5.31415e-15	1.62077e-12	9.23412e-11	8.86696e-11	7.69916e-12	1.38668e-09	9.97271e-08
CHOC760101.lag20	1.07967e-16	7.31791e-14	3.41273e-13	2.62631e-18	1.36975e-15	4.0156e-16	1.78187e-11	9.16879e-14	3.39255e-15	5.85055e-17	8.20165e-14	5.01539e-11	1.21887e-12	2.54866e-11	8.07803e-13	7.07482e-15	1.57081e-17	2.79479e-18	1.60732e-16	1.10119e-10	2.76797e-15	9.45404e-16	3.20224e-10	5.84925e-14	2.39362e-16	2.21189e-16	1.39885e-18	2.03266e-12	1.7744e-11	1.05016e-06	2.68374e-18	6.18212e-11	2.65793e-13	1.143e-14	6.43184e-12	6.39612e-18	4.78637e-15	3.3622e-21	1.5643e-14	1.80642e-13	7.71563e-12	2.4281e-18	5.40533e-15	1.89894e-12	4.55881e-15	3.17045e-17	1.3376e-12	2.58597e-12	8.39943e-10
CHOC760101.lag28	5.64323e-16	1.80534e-12	1.39385e-10	3.39046e-10	2.90592e-11	8.31194e-07	3.32284e-07	7.17045e-10	1.84547e-12	6.95238e-08	8.48067e-10	1.07652e-12	1.51787e-08	1.13948e-09	9.42323e-11	8.95867e-12	6.80026e-17	8.51233e-14	1.61098e-09	5.87727e-12	9.79945e-18	8.81338e-10	3.74799e-10	2.40606e-12	1.18164e-12	7.08206e-09	1.73145e-12	8.41093e-11	4.42128e-09	1.82661e-10	1.84664e-11	1.68627e-10	4.289e-11	1.00042e-12	1.00484e-08	2.0858e-15	2.31279e-13	1.98433e-13	1.57556e-14	2.44792e-15	3.92713e-13	1.3031e-18	1.57216e-10	1.57775e-09	1.0495e-09	1.89771e-11	3.0397e-13	1.77624e-10	8.35569e-09
CHOC760101.lag4	7.9674e-24	4.91544e-17	6.54319e-14	4.71275e-18	2.92191e-12	6.84681e-16	2.85271e-12	1.0209e-14	5.17904e-14	2.38753e-16	8.00448e-17	2.82598e-19	2.81253e-21	1.34957e-20	2.55152e-20	1.28125e-17	2.59103e-18	4.74426e-21	1.60841e-20	1.94413e-18	1.52983e-17	7.03803e-20	6.35847e-13	3.92855e-15	1.32972e-19	8.70291e-21	8.42802e-16	3.6751e-10	3.0286e-14	3.29507e-18	3.91538e-16	8.41926e-15	1.0707e-21	3.84671e-16	5.67441e-15	3.01119e-20	1.58641e-19	5.43951e-22	9.00845e-19	6.37734e-14	1.83985e-19	2.72697e-27	2.20447e-13	1.34073e-11	4.31076e-20	2.53089e-21	1.73342e-14	2.24468e-18	1.7289e-15
CHOC760101.lag6	6.43065e-16	2.47542e-12	2.41992e-17	6.83558e-17	2.3284e-12	6.08632e-14	4.67823e-17	2.00825e-11	8.72413e-11	5.25349e-13	7.80127e-11	3.32183e-18	1.75585e-11	2.47132e-17	1.98136e-17	3.68602e-13	2.94832e-16	1.57913e-17	5.84925e-14	2.75442e-15	1.04413e-16	3.89036e-15	7.5975e-11	6.76511e-17	4.70011e-18	6.64323e-15	1.68338e-18	3.4173e-12	1.83595e-16	2.22379e-12	5.29928e-16	3.75801e-11	3.78185e-19	4.55231e-14	3.65794e-14	5.98237e-18	1.24692e-16	1.89955e-17	1.96174e-13	6.38241e-16	1.06169e-18	2.26816e-19	1.93941e-13	1.22157e-11	6.90565e-15	2.52139e-19	6.52912e-12	3.40672e-16	2.69782e-09
CHOC760101.lag7	3.62931e-16	6.75502e-13	1.1052e-14	9.99844e-21	1.08517e-18	3.51938e-15	1.84141e-12	1.49993e-16	1.04636e-13	1.43026e-19	7.70246e-14	4.0529e-19	1.83564e-13	5.19144e-17	7.28321e-15	1.99229e-16	1.86612e-11	8.85292e-17	2.29221e-16	5.51129e-17	3.93617e-18	1.10255e-14	1.89324e-14	1.68626e-13	2.01183e-19	3.98092e-20	4.06531e-18	5.79975e-15	9.27174e-15	2.34454e-11	5.06628e-12	3.32582e-11	8.00625e-19	7.4931e-16	1.49843e-14	6.21713e-19	3.28801e-16	2.90029e-17	7.77372e-21	1.0024e-18	1.27971e-12	8.534e-16	2.49472e-18	1.85501e-17	1.0342e-15	2.77972e-18	4.42726e-10	3.18951e-16	2.19944e-13
CHOC760101.lag8	3.26878e-13	2.53954e-13	6.80051e-12	6.53181e-13	5.06769e-13	3.15936e-13	4.95485e-13	3.42398e-10	2.53117e-10	1.72658e-11	1.37225e-11	3.10303e-09	4.86294e-12	6.74467e-14	1.33903e-14	8.51233e-14	4.68345e-13	2.02374e-08	1.50577e-11	1.13541e-12	1.0645e-08	4.21881e-11	1.95426e-11	5.02366e-14	9.22717e-15	8.567e-08	7.12697e-16	4.92933e-10	2.60994e-13	3.68108e-11	2.03027e-13	4.34745e-13	4.54436e-16	1.53784e-11	7.14278e-10	3.05354e-13	1.89455e-17	1.52764e-15	1.90767e-16	1.43229e-16	3.57258e-18	9.51616e-17	3.88217e-08	3.98189e-11	4.13266e-11	3.75037e-15	3.99838e-11	3.75338e-13	3.90465e-06
CHOC760101.lag9	2.61214e-18	9.15221e-16	5.70072e-14	3.23924e-13	2.29176e-13	7.60532e-13	1.88976e-11	2.20204e-11	3.19019e-14	3.808e-16	1.82677e-14	2.94389e-14	1.63693e-14	6.80788e-14	3.60348e-13	4.9419e-14	1.92475e-17	1.77103e-14	8.04204e-13	6.82971e-12	1.57763e-15	1.10355e-13	1.29122e-13	1.47034e-17	1.03671e-13	1.03077e-14	7.7216e-16	2.20139e-17	6.98973e-15	1.7626e-14	2.88689e-18	2.60236e-10	2.50887e-15	1.28265e-16	5.70915e-13	1.00122e-15	1.1089e-15	1.00974e-16	6.37904e-18	7.60532e-13	3.56269e-15	1.21311e-20	5.71532e-12	4.03825e-12	1.55052e-15	5.34974e-10	5.92782e-15	8.46498e-18	1.34704e-10
CI	1.70931e-13	4.78135e-11	1.50163e-12	4.08558e-11	4.60318e-07	6.92228e-14	1.09524e-12	6.59467e-09	8.17286e-10	2.22701e-10	7.39798e-09	8.93838e-10	4.49727e-07	3.79227e-10	3.41502e-12	2.00623e-13	1.5259e-10	1.33637e-11	8.75284e-12	2.88506e-15	4.11897e-12	9.70714e-10	4.34293e-16	1.47656e-12	9.75528e-17	3.28797e-11	3.21341e-10	1.5142e-09	8.88517e-11	1.46766e-09	4.14226e-09	1.79198e-10	1.05369e-12	1.80059e-13	8.89144e-10	1.56641e-14	3.68255e-12	6.40294e-10	1.496e-14	3.55503e-12	8.24842e-14	6.8858e-13	1.92441e-12	1.46967e-14	2.94617e-07	7.89639e-11	2.05406e-10	3.95762e-15	8.28163e-11
CIDH920105.lag1	1.56219e-69	3.38422e-64	4.35293e-71	3.5483e-62	3.12088e-65	6.80753e-66	2.22789e-62	2.27897e-65	4.58859e-83	3.45527e-64	1.31447e-68	9.35056e-64	9.39908e-64	9.58963e-68	2.52033e-73	4.58577e-66	6.14586e-67	1.50177e-62	2.74221e-68	1.1241e-76	5.15136e-62	5.66802e-60	1.02072e-65	4.43093e-69	7.03752e-73	1.09191e-74	6.51525e-67	5.56112e-62	3.53479e-70	1.48998e-65	1.32155e-68	1.7845e-63	4.41964e-66	5.50723e-71	2.64456e-71	3.10658e-76	1.02406e-69	1.41498e-71	9.70396e-73	6.68195e-62	7.06237e-76	2.99978e-67	1.89389e-68	1.24249e-58	4.72825e-63	8.27086e-66	1.25923e-64	3.6901e-65	8.85147e-68
CIDH920105.lag1.1	1.08763e-46	5.83344e-47	9.27472e-54	9.19135e-40	3.33666e-49	3.01339e-45	3.75566e-39	4.59243e-48	1.07051e-62	1.765e-44	2.81984e-47	2.61938e-42	6.46566e-42	4.08335e-51	1.28022e-53	2.63497e-46	1.57813e-44	1.5493e-45	1.44693e-49	4.94294e-53	2.25525e-44	4.46562e-39	7.96655e-50	4.03298e-48	7.79189e-51	2.65289e-52	3.09984e-46	1.00025e-42	1.64345e-49	8.51831e-45	1.34534e-49	4.91227e-46	2.30952e-46	1.15765e-52	1.18433e-49	5.07412e-54	7.40572e-50	2.31106e-51	5.18641e-50	5.67378e-45	7.87594e-53	2.85619e-44	2.68148e-48	2.72013e-39	1.00059e-43	3.04053e-48	2.72699e-45	9.38318e-46	2.37124e-46
CIDH920105.lag1.2	1.50056e-49	2.82134e-49	2.33973e-56	1.82572e-42	1.2585e-51	8.70432e-48	5.77649e-42	1.82496e-50	4.66969e-65	3.27917e-47	2.31683e-50	1.71996e-45	1.15224e-44	3.74207e-54	1.09508e-56	5.1767e-49	6.28909e-47	1.97562e-48	1.78209e-52	5.44207e-56	2.07526e-47	9.60737e-42	1.9118e-52	1.07068e-50	1.19806e-53	2.39656e-55	4.7075e-49	2.47843e-45	3.41461e-52	1.39651e-47	2.99582e-52	1.03776e-48	4.45866e-49	3.55557e-55	1.42306e-52	9.69431e-57	1.34519e-52	4.13546e-54	3.14355e-53	1.66137e-47	1.40361e-55	5.7311e-47	4.47873e-51	6.14981e-42	1.46137e-46	9.85539e-51	5.25252e-48	1.28838e-48	3.32157e-49
CIDH920105.lag10	6.78922e-26	1.45626e-28	6.3886e-22	1.62884e-27	1.97709e-16	3.29329e-26	1.71709e-24	4.14461e-31	1.4426e-29	1.41252e-26	1.43124e-26	9.39878e-22	1.9147e-21	6.99141e-24	7.12632e-30	3.07971e-35	1.12642e-22	2.61268e-10	2.6606e-25	1.66241e-21	4.67521e-23	5.94628e-29	8.19555e-26	1.37126e-26	2.14359e-18	2.33239e-25	2.70204e-17	2.95635e-26	8.55312e-21	7.25214e-30	3.96389e-28	2.35415e-27	4.90097e-27	1.30386e-19	2.69743e-26	2.20581e-19	2.71042e-24	4.38835e-28	4.8685e-27	1.32736e-25	6.57346e-25	4.44825e-28	2.8862e-27	1.48625e-21	1.84982e-26	3.53879e-26	1.28691e-22	1.46303e-27	2.12749e-24
CIDH920105.lag12	2.7034e-45	2.44945e-38	4.30903e-32	2.76273e-40	3.11325e-34	1.43338e-35	1.69524e-39	9.34426e-35	9.92091e-44	1.23995e-42	2.86897e-37	2.76275e-45	1.3015e-45	5.36607e-41	8.97091e-38	7.6555e-40	7.5789e-48	7.28312e-31	5.91139e-47	1.43246e-45	2.41212e-35	8.23717e-41	6.5266e-33	1.00368e-44	1.1668e-48	5.52212e-52	2.49606e-49	1.14985e-36	1.40347e-48	1.25775e-50	7.20644e-42	9.80188e-46	7.13521e-52	4.62107e-40	1.22955e-42	1.0106e-45	3.5806e-50	5.09963e-39	1.00501e-39	2.19784e-44	3.78604e-39	5.71155e-40	1.61924e-43	2.12443e-46	3.93058e-35	3.66983e-41	3.76199e-41	6.43359e-41	1.56288e-41
CIDH920105.lag12.1	8.36559e-19	5.0948e-14	9.99333e-11	4.16489e-18	2.24827e-12	5.23268e-12	1.3174e-18	4.75794e-13	5.39344e-16	2.12047e-18	2.20626e-16	2.84755e-17	3.88169e-22	5.06795e-20	7.69996e-17	1.36297e-15	9.43749e-20	1.86586e-12	1.66005e-20	2.10368e-19	1.83564e-13	7.25509e-17	1.59216e-13	3.45183e-21	5.66681e-23	2.48211e-24	1.25234e-22	4.41665e-15	2.59096e-21	2.40081e-25	1.79421e-15	6.80377e-23	3.53777e-22	6.53153e-15	7.44531e-17	5.42332e-22	9.53909e-22	2.90928e-14	8.59869e-13	8.00423e-18	2.05948e-16	4.85006e-14	4.99658e-20	7.26005e-22	3.70351e-16	2.00849e-18	8.01691e-16	1.0144e-17	1.75818e-20
CIDH920105.lag12.2	1.45674e-22	3.81718e-17	7.47055e-13	5.65438e-22	1.48772e-14	2.06262e-14	2.22431e-21	9.15221e-16	7.11802e-20	1.69704e-21	5.25826e-20	4.7167e-21	3.94876e-24	1.79364e-23	7.25252e-19	9.56814e-19	3.56053e-23	6.90565e-15	8.1343e-25	1.40062e-22	1.66596e-16	4.73166e-19	7.34448e-16	4.99236e-24	4.46161e-26	1.52315e-27	1.38033e-26	7.44531e-17	6.9292e-23	6.65363e-28	6.73364e-19	5.09934e-26	1.10695e-27	6.67562e-18	2.063e-19	1.21257e-25	1.79161e-25	7.38773e-17	1.70343e-15	1.2159e-21	3.96414e-19	5.05816e-17	6.97151e-23	2.01822e-25	7.96241e-19	1.2298e-22	2.425e-19	5.45556e-21	8.58448e-24
CIDH920105.lag13	6.97871e-17	6.32261e-10	6.55974e-11	1.86475e-06	3.27395e-08	1.09176e-11	1.27626e-08	1.02005e-13	2.07773e-12	1.73276e-07	1.20726e-08	9.88024e-12	2.22866e-12	1.82944e-08	6.952e-10	2.95503e-06	1.74807e-10	8.0199e-10	5.33686e-13	1.43073e-10	2.59693e-11	4.50729e-13	6.23313e-08	6.30333e-14	3.15273e-14	2.54627e-10	4.80344e-11	2.61322e-11	1.37806e-11	2.68225e-13	5.84911e-07	5.50084e-11	2.83412e-12	4.35963e-08	2.37907e-11	6.01172e-13	4.58767e-12	1.32582e-12	4.06984e-10	8.21993e-16	4.43593e-10	6.10668e-11	6.50034e-09	2.96385e-08	5.67126e-10	3.36573e-12	1.26488e-08	9.37237e-10	2.67762e-08
CIDH920105.lag15	1.63375e-18	1.17421e-15	4.47725e-19	8.92174e-17	6.94045e-19	3.21439e-22	1.62847e-21	2.19834e-21	2.836e-20	3.43171e-21	1.3042e-14	9.43749e-20	6.80166e-18	3.7285e-17	3.35581e-20	1.15175e-20	2.31284e-19	3.21791e-21	9.5921e-23	4.11733e-17	1.50389e-21	3.83699e-16	7.56852e-16	4.18594e-15	2.52187e-18	9.99663e-19	5.44597e-13	2.80234e-16	8.25662e-17	7.14335e-23	6.07337e-22	2.50826e-18	7.53692e-19	1.53525e-21	7.51021e-24	2.85986e-16	2.63342e-18	7.05186e-30	4.26843e-15	5.03371e-22	1.47915e-26	3.11947e-22	2.4362e-21	2.16453e-13	1.27448e-17	3.47448e-17	4.0218e-18	1.26112e-18	1.11831e-18
CIDH920105.lag16	4.39517e-15	8.15095e-20	6.53931e-20	3.21605e-18	1.06851e-20	4.1066e-17	1.01981e-17	1.19084e-18	3.60595e-24	5.53019e-23	3.06358e-18	4.54121e-25	1.47709e-14	1.11028e-17	8.20646e-19	6.25891e-17	3.00547e-25	3.30149e-19	1.17783e-28	2.98198e-18	2.38668e-21	6.44749e-20	2.47963e-19	4.52149e-16	2.5153e-20	1.66559e-23	7.49563e-19	9.63965e-17	4.43823e-15	2.56827e-21	7.49969e-23	1.2598e-16	1.69704e-21	1.09231e-28	1.39404e-24	5.23176e-24	7.6821e-25	5.65532e-18	4.37182e-17	2.22316e-26	2.67587e-21	2.31618e-24	7.32196e-20	1.08717e-20	2.60547e-22	1.04682e-16	1.13199e-20	2.22651e-18	3.89403e-18
CIDH920105.lag19	9.5467e-21	2.22316e-26	5.76879e-25	9.12428e-22	6.62783e-21	1.11777e-26	1.54975e-25	1.14098e-27	1.44633e-28	5.48836e-22	6.49996e-23	2.64556e-28	2.78721e-26	9.09727e-22	1.11728e-19	1.30514e-26	8.24929e-31	1.58091e-20	8.01157e-26	6.11862e-26	1.85601e-28	4.53324e-30	1.91858e-19	6.32708e-25	9.57788e-28	1.02223e-24	6.67983e-26	2.41796e-27	6.78922e-26	7.06462e-21	3.5499e-24	1.94937e-23	9.07815e-24	1.49102e-33	2.64494e-26	1.03047e-28	4.49743e-29	4.74895e-24	9.39356e-24	1.68714e-29	2.04559e-27	3.3297e-29	4.71583e-26	2.00153e-26	1.5079e-27	1.6057e-25	3.93642e-24	3.72069e-24	4.08675e-25
CIDH920105.lag2	8.87883e-64	1.88278e-57	6.26611e-60	1.59174e-53	2.14426e-53	1.37015e-55	6.53966e-48	1.71402e-56	4.28654e-62	3.35385e-54	1.96113e-59	3.02711e-59	1.03446e-60	7.49138e-54	2.83389e-60	3.47454e-57	1.28107e-62	6.83247e-56	4.0014e-59	9.31083e-56	1.11121e-56	4.5093e-59	2.39615e-49	1.01875e-57	1.5683e-55	2.09533e-60	8.25295e-57	6.4252e-60	1.09317e-45	1.74973e-53	5.26601e-57	2.47314e-52	4.49954e-60	4.99032e-57	8.75055e-57	8.82873e-56	1.15349e-53	7.50544e-60	4.21519e-60	2.98513e-57	1.71297e-60	1.62207e-59	1.82113e-55	4.23281e-52	5.53153e-58	3.13499e-57	1.36854e-59	5.01198e-58	1.67679e-53
CIDH920105.lag2.1	2.29824e-40	2.19706e-40	5.9232e-37	7.96109e-33	2.06221e-35	7.53754e-38	2.91998e-25	2.30401e-35	4.15805e-38	1.11944e-33	1.84565e-35	1.88852e-35	1.0845e-37	1.65458e-33	8.10376e-40	4.05187e-37	4.17318e-40	1.69009e-35	2.51873e-38	6.3468e-35	7.53754e-38	4.22465e-38	1.55741e-29	1.13265e-37	2.18395e-35	5.61621e-39	3.31744e-37	1.24741e-38	5.21691e-26	5.07229e-30	2.88398e-38	5.14685e-34	1.05089e-39	5.26871e-35	6.20123e-36	1.07448e-33	5.49574e-31	1.04249e-37	1.70902e-39	8.02856e-39	9.73206e-39	2.94253e-36	1.29499e-31	1.74343e-34	2.26632e-37	9.34187e-40	3.67732e-40	7.3503e-39	2.60894e-34
CIDH920105.lag2.2	3.31898e-43	6.98844e-43	1.48324e-39	2.31283e-35	5.57765e-38	4.89244e-40	5.35898e-28	7.24495e-38	5.12796e-41	5.58826e-36	8.97091e-38	3.5328e-38	9.83115e-41	1.95104e-36	2.83657e-42	1.72291e-39	1.43671e-42	2.06354e-38	7.34026e-41	2.17036e-37	9.28109e-41	4.64431e-41	2.96222e-32	2.10031e-40	6.85419e-38	1.05728e-41	5.09592e-40	2.27039e-41	5.48743e-28	1.32598e-32	2.65204e-40	2.91984e-36	2.66369e-42	1.3528e-37	3.69074e-38	3.76919e-36	5.03247e-34	1.231e-39	2.39854e-42	9.55218e-41	3.30938e-41	1.77317e-38	7.39829e-34	3.16484e-37	3.29345e-40	2.39854e-42	1.0974e-42	2.56029e-41	1.00329e-36
CIDH920105.lag22	4.2714e-22	2.16466e-23	1.82889e-24	2.90798e-23	4.17757e-24	1.88894e-20	1.34095e-19	4.6317e-24	8.92182e-33	6.24977e-24	3.53189e-28	2.02874e-19	2.55334e-24	3.74606e-21	1.23072e-20	3.38462e-20	2.28226e-26	2.047e-18	7.26005e-22	4.31847e-26	1.53707e-23	5.47642e-18	5.99849e-19	9.12428e-22	4.07219e-26	5.61519e-23	5.62835e-20	7.01408e-23	4.44724e-24	4.01503e-20	9.87262e-28	8.7306e-23	2.37372e-22	1.20614e-20	4.87165e-25	1.01513e-21	4.82523e-25	2.5193e-25	1.04158e-25	1.04255e-21	2.89867e-34	2.90132e-25	2.11413e-24	4.74777e-20	1.68406e-20	3.19518e-22	1.70934e-17	9.73873e-23	4.12076e-19
CIDH920105.lag23	8.97929e-14	3.32936e-12	2.68273e-09	8.46436e-10	4.88313e-11	6.23144e-13	4.67628e-10	5.09479e-09	1.46565e-13	1.28527e-13	3.14465e-11	2.94389e-14	6.46853e-15	1.55773e-12	7.35207e-14	8.49258e-14	6.81985e-18	4.55198e-08	5.48926e-16	2.49933e-13	4.45102e-12	7.92614e-15	1.13314e-07	2.98494e-13	8.04204e-13	2.87441e-16	1.46572e-16	4.42226e-12	1.33225e-11	2.6091e-14	3.44733e-17	9.1607e-15	4.25999e-13	1.15559e-18	6.58659e-11	4.12738e-13	7.29413e-11	3.20161e-12	3.21059e-11	8.25904e-14	4.20642e-15	3.94913e-11	9.42942e-15	1.87386e-16	6.66074e-17	1.79049e-10	2.45897e-14	7.93709e-16	6.15362e-09
CIDH920105.lag25	1.71467e-22	2.28997e-17	3.26852e-18	2.91371e-19	3.59188e-18	3.58367e-16	2.12891e-16	2.77401e-16	9.85509e-22	8.24458e-24	4.0218e-18	7.03508e-24	2.02874e-19	1.34283e-13	2.46785e-16	1.77339e-20	8.84541e-20	4.23636e-19	1.29472e-22	6.19711e-20	3.16216e-17	7.99421e-23	3.8273e-16	1.90235e-18	1.397e-20	2.72978e-25	7.23262e-19	6.34346e-23	5.19233e-21	2.61428e-19	1.69923e-22	5.44716e-18	2.149e-20	1.83773e-27	9.99093e-27	6.4735e-17	6.44749e-20	1.11323e-17	2.89018e-23	1.64267e-18	2.16318e-19	1.191e-21	2.66328e-20	9.10786e-17	5.44646e-23	3.43196e-23	3.72069e-24	1.18204e-20	1.85534e-19
CIDH920105.lag26	3.96711e-15	1.07892e-12	6.74458e-16	3.17388e-12	3.98653e-15	1.1665e-13	5.08659e-15	2.36079e-13	1.44909e-14	7.7252e-13	1.17229e-10	2.2025e-18	2.76416e-09	1.64158e-11	1.98721e-16	2.01501e-15	5.58195e-14	4.48827e-10	4.80198e-20	3.4681e-15	9.79534e-10	1.25306e-13	2.11888e-08	2.13752e-14	5.08659e-15	1.11831e-18	4.75154e-15	1.15107e-15	9.22946e-10	1.74532e-13	8.08767e-17	3.22046e-14	7.6821e-25	5.55589e-14	8.78462e-17	5.09852e-11	9.27576e-14	4.20265e-13	2.83095e-16	2.13312e-12	6.56325e-15	8.21406e-17	1.7621e-10	5.94575e-14	2.9079e-17	5.98296e-11	5.90258e-12	1.93941e-13	3.23661e-12
CIDH920105.lag28	1.67153e-12	8.04702e-18	4.55011e-10	4.77107e-14	4.11775e-08	1.31601e-16	1.13185e-11	1.21641e-11	9.9425e-17	9.49918e-10	3.07364e-11	4.02603e-13	1.2108e-12	1.99566e-11	1.03433e-12	4.73619e-08	2.31734e-14	1.68631e-12	4.92149e-13	4.29864e-13	3.28962e-14	7.81519e-12	5.4113e-11	2.62237e-15	2.26804e-12	4.04764e-14	9.87083e-15	1.41265e-13	1.65426e-09	5.43166e-15	8.78848e-12	1.96659e-11	1.7506e-12	5.74895e-10	2.23861e-18	5.50413e-14	1.61713e-17	5.20454e-18	1.87837e-10	3.2974e-14	6.27218e-21	2.05283e-14	1.80944e-14	1.7385e-07	6.32261e-10	1.74807e-10	1.16603e-12	1.88823e-09	2.4963e-10
CIDH920105.lag3.1	2.14436e-26	2.15516e-20	1.8072e-27	1.68714e-29	7.64299e-30	7.18202e-33	3.12542e-26	1.25868e-26	2.54532e-24	6.34917e-27	1.08148e-26	2.32014e-32	6.54218e-28	6.56318e-27	1.53232e-23	2.79635e-26	6.63874e-29	2.51386e-28	3.97129e-21	4.08707e-24	1.03152e-25	7.90449e-31	5.01909e-32	6.09277e-20	1.14388e-26	7.21535e-28	9.16311e-24	1.10304e-29	1.22591e-26	1.14773e-25	4.09885e-26	2.03532e-23	2.31999e-26	4.93592e-26	5.69086e-27	2.12735e-28	6.1947e-30	1.2147e-28	4.48357e-25	4.66206e-21	1.83771e-26	1.02246e-26	5.40717e-22	4.67533e-24	1.33356e-33	1.11528e-33	1.63431e-27	2.21182e-23	2.47519e-27
CIDH920105.lag3.2	1.82714e-23	8.85706e-18	2.57656e-25	9.4453e-27	1.37724e-27	3.31495e-30	2.05423e-23	1.15631e-23	1.27854e-21	1.06861e-24	9.16311e-24	9.29694e-29	2.07083e-25	1.17142e-24	8.3332e-21	7.12323e-24	4.82463e-26	2.01822e-25	1.69717e-18	1.29374e-21	4.68952e-23	4.12855e-28	6.78542e-30	1.33672e-17	1.71168e-24	1.93553e-25	2.37271e-21	4.80422e-27	1.90539e-24	3.07318e-23	8.3737e-24	2.41485e-21	2.30922e-23	6.19161e-24	9.84069e-25	1.17021e-25	1.75351e-27	2.03466e-26	1.35072e-22	2.12623e-18	7.69945e-24	1.54659e-23	1.21211e-19	1.31687e-21	4.76443e-31	5.00868e-31	4.61431e-25	1.09032e-20	9.06159e-25
CIDH920105.lag30	5.73155e-18	1.86533e-13	1.27608e-16	2.88172e-16	2.6215e-14	1.09463e-14	8.41161e-19	5.65807e-13	2.11269e-16	2.17832e-16	4.70562e-11	1.30869e-17	1.09648e-16	1.83504e-11	6.66053e-16	8.35298e-13	1.9805e-15	1.36467e-13	7.66384e-16	2.01413e-14	5.80507e-10	4.05638e-16	2.17338e-14	3.46489e-14	2.57132e-15	8.40588e-21	6.76151e-16	7.86544e-12	1.04357e-12	1.60064e-11	6.43014e-13	2.31322e-15	3.00143e-15	5.91802e-14	5.16756e-16	1.3465e-12	1.62782e-11	1.50577e-11	1.27331e-14	8.8301e-17	4.67494e-18	5.82197e-14	1.95742e-14	8.67115e-11	2.28171e-11	3.08003e-11	3.8047e-13	1.29681e-12	2.62007e-12
CIDH920105.lag4	2.66993e-46	3.51878e-38	7.17319e-37	1.50531e-38	3.04646e-31	1.80132e-39	8.13675e-40	7.74391e-41	4.16561e-44	1.63464e-37	3.40447e-43	2.44938e-42	2.90155e-39	9.687e-37	2.3322e-36	1.70451e-33	4.25769e-42	5.43849e-39	1.53672e-42	2.70222e-36	7.59433e-34	4.97623e-34	3.02153e-35	2.22421e-40	1.59605e-40	1.70033e-37	1.23425e-35	1.0144e-29	1.52753e-36	3.33047e-36	3.16603e-44	3.37489e-35	2.63e-31	1.05856e-35	6.2213e-40	4.03235e-42	8.14039e-48	2.97691e-36	2.34126e-36	2.44623e-41	6.07915e-43	6.74116e-42	1.62037e-35	5.2046e-32	3.53754e-33	1.60908e-37	8.97091e-38	8.35272e-37	1.33154e-29
CIDH920105.lag4.1	1.69411e-22	1.38499e-20	1.46572e-16	9.12385e-20	3.83437e-14	2.35097e-17	5.34593e-18	1.81579e-22	4.4757e-21	2.09782e-19	5.73924e-22	1.43026e-19	1.84285e-21	4.05439e-18	4.79747e-19	1.0712e-14	3.82548e-20	9.65282e-22	3.46089e-19	2.61214e-18	1.43186e-14	1.15573e-12	6.97871e-17	3.5453e-15	1.31565e-17	3.19892e-15	9.03867e-16	5.98296e-11	1.6498e-19	6.8391e-15	7.04744e-22	2.75934e-17	6.53181e-13	4.24504e-16	7.31165e-17	6.48406e-20	1.49064e-21	7.42607e-17	9.68255e-15	5.05587e-19	3.95928e-17	1.40068e-15	3.71389e-15	7.99455e-14	2.09635e-13	1.2821e-19	8.17676e-18	5.24572e-17	1.14656e-10
CIDH920105.lag4.2	2.59315e-25	7.80213e-23	2.61214e-18	3.34208e-22	3.67551e-16	6.70786e-20	6.92264e-21	4.31494e-25	1.178e-23	3.8346e-21	5.55231e-25	4.84219e-22	3.38688e-24	2.38909e-20	1.70706e-21	6.39012e-17	2.85103e-22	5.23176e-24	2.87681e-22	1.20962e-20	5.08454e-17	8.13951e-15	1.06751e-18	1.36534e-17	7.59573e-20	3.04035e-17	1.20867e-17	1.76219e-12	1.05185e-21	4.22613e-17	1.72251e-24	1.50845e-19	2.46605e-15	3.34881e-18	5.09791e-19	3.24767e-23	2.28721e-24	1.97069e-18	3.53865e-17	2.31086e-21	1.10169e-19	3.93617e-18	8.97575e-18	1.09791e-15	1.36297e-15	4.23328e-22	4.07252e-20	5.04193e-19	1.09825e-12
CIDH920105.lag5	2.57349e-20	1.21042e-13	8.68458e-16	4.98846e-14	1.48067e-12	3.13813e-11	3.3951e-12	5.25803e-11	5.70058e-17	2.58597e-12	2.11808e-16	3.86753e-23	5.58675e-16	1.37731e-13	1.82552e-15	2.14359e-18	8.36397e-17	5.79009e-11	5.14029e-19	1.76432e-19	4.28159e-17	2.25759e-14	1.66052e-12	2.91824e-18	4.56332e-18	3.30519e-14	1.31992e-14	2.35839e-19	3.61315e-11	3.35137e-13	2.70442e-16	1.60401e-11	2.47782e-17	4.68262e-15	1.35023e-16	2.47132e-17	6.45674e-17	1.77836e-17	7.1248e-17	3.06269e-16	2.26006e-17	2.66328e-20	6.43717e-14	3.43797e-11	7.31019e-18	1.26365e-11	5.80145e-16	1.79865e-15	1.87397e-11
CIDH920105.lag6	3.20161e-12	2.77797e-10	3.17338e-16	4.45402e-09	6.45949e-12	8.29669e-12	5.28892e-18	3.95732e-09	1.67084e-13	3.92814e-09	1.2605e-10	7.05138e-17	1.6012e-08	1.51038e-10	1.96654e-10	7.39833e-09	3.21287e-14	1.34975e-10	7.55436e-10	2.75295e-16	7.64888e-14	1.53819e-13	2.05507e-11	3.48222e-09	6.08814e-15	2.14483e-13	1.16862e-12	6.70101e-10	2.30306e-12	3.87978e-14	4.93359e-11	2.57001e-11	8.14178e-11	1.10355e-13	3.8254e-12	1.30991e-11	1.70913e-16	2.78844e-15	2.43251e-12	1.45154e-12	6.57498e-17	6.47924e-16	1.02805e-10	6.64931e-10	1.08476e-07	3.20394e-11	5.41259e-10	1.99814e-10	1.93928e-10
CIDH920105.lag7	2.10583e-46	7.62059e-39	6.48684e-41	2.15208e-39	7.98139e-32	3.25298e-37	6.86548e-39	1.12414e-38	2.95977e-48	6.25062e-41	9.82488e-38	7.44531e-43	4.29346e-42	5.68434e-39	1.94746e-41	2.72568e-35	7.48522e-44	1.54544e-36	2.80215e-37	1.4279e-35	6.32187e-36	4.26361e-37	1.36781e-39	5.33254e-43	1.20785e-41	2.94868e-45	2.85458e-40	1.03506e-36	2.73113e-39	4.35907e-39	2.42034e-38	6.85419e-38	3.90629e-44	8.988e-42	7.86591e-42	1.41909e-43	9.69621e-45	1.09132e-34	7.29096e-40	5.95591e-34	4.31954e-50	4.91145e-48	6.41246e-39	3.17305e-38	1.0355e-41	1.66802e-39	3.47156e-34	8.5781e-40	4.59835e-33
CIDH920105.lag7.1	1.52426e-22	4.03557e-22	1.58118e-21	3.53239e-20	1.46462e-15	1.02547e-16	7.31256e-19	1.82665e-21	1.78811e-23	1.9726e-24	8.8301e-17	1.19591e-17	9.73873e-23	9.62069e-19	2.6509e-19	1.10312e-18	1.73026e-22	2.60508e-18	4.52149e-16	3.03769e-19	5.03191e-17	1.52386e-15	7.23179e-25	1.57189e-21	1.94013e-19	6.12735e-20	3.29234e-19	1.62923e-15	7.59573e-20	1.28806e-17	1.28194e-18	1.75448e-19	7.01408e-23	2.24302e-19	7.4879e-18	1.66961e-20	2.15115e-19	1.45256e-14	1.27402e-20	2.604e-13	2.57961e-23	3.89128e-23	6.72935e-18	7.05795e-20	2.65487e-18	1.16176e-20	2.17855e-14	5.81943e-19	3.13787e-14
CIDH920105.lag7.2	3.06383e-25	2.55186e-25	1.14212e-24	1.20767e-22	3.29507e-18	1.72048e-19	2.82078e-21	2.64315e-24	3.27625e-27	1.30085e-26	4.36003e-20	1.86204e-20	1.18161e-25	1.14271e-21	1.08345e-21	6.34545e-21	9.38346e-25	2.28872e-20	1.10312e-18	8.91039e-22	3.36623e-19	1.4258e-18	2.72406e-26	1.60698e-24	9.739e-22	3.49565e-22	1.15289e-21	1.09274e-17	1.50833e-21	2.6481e-20	4.52818e-21	2.09828e-22	6.61503e-26	7.479e-22	1.32264e-20	1.29267e-23	4.49394e-22	2.01787e-16	2.63572e-23	1.01631e-15	1.87429e-26	4.66263e-27	1.51725e-21	4.59025e-23	3.82342e-21	1.32097e-23	5.32819e-17	4.29701e-22	8.4073e-17
CIDH920105.lag9	3.38094e-16	9.94236e-15	3.12308e-14	1.15845e-13	4.82789e-21	1.60979e-14	1.90851e-15	4.11806e-13	1.66874e-22	1.12415e-13	1.92746e-15	9.03762e-17	2.74046e-20	7.14379e-13	1.02283e-16	4.60202e-16	3.88759e-17	1.48772e-14	1.80757e-15	4.13919e-16	2.76282e-13	2.14359e-18	1.32619e-16	5.49804e-15	7.38966e-15	3.61785e-19	2.51859e-16	1.82552e-15	6.04371e-12	6.35972e-15	1.24613e-14	5.64323e-16	7.69036e-18	1.02394e-15	5.43431e-16	3.67551e-16	2.89639e-16	4.59973e-13	4.28117e-12	1.31642e-15	6.07919e-18	7.53167e-20	3.4092e-15	3.2466e-13	9.46411e-20	4.37473e-12	6.64166e-19	3.0967e-10	4.11806e-13
CK	2.17885e-19	4.92221e-17	2.90969e-14	6.33035e-16	3.67704e-15	2.98152e-15	1.68183e-16	4.26572e-19	3.39029e-20	4.2601e-19	1.88622e-18	3.22637e-20	1.27204e-22	2.207e-19	4.88199e-22	1.09957e-19	2.72852e-19	2.75369e-21	3.15691e-17	5.24295e-19	5.41493e-19	1.34855e-19	4.87023e-22	3.95204e-18	4.65349e-17	4.39772e-18	1.90023e-13	9.47441e-19	1.81815e-13	1.32107e-17	9.77685e-18	1.96458e-16	4.37442e-17	4.99978e-16	5.3569e-18	3.11851e-12	9.46048e-17	4.11917e-19	1.21159e-13	2.28158e-18	7.43801e-14	4.17686e-26	6.09978e-18	8.67124e-17	7.24508e-17	1.7007e-16	2.40444e-17	6.12157e-20	7.49598e-19
CKL	6.17703e-10	6.10796e-10	1.60154e-08	3.50683e-09	1.52743e-08	5.43398e-07	8.57741e-09	4.55812e-08	3.52012e-11	2.54977e-09	1.95957e-11	1.02855e-10	5.09416e-13	1.35676e-09	2.64309e-09	2.66503e-07	4.24603e-09	7.0084e-09	2.71038e-09	2.86023e-09	2.84556e-10	3.23144e-11	4.7245e-08	5.8958e-08	1.15655e-11	7.54573e-13	1.73127e-07	9.88464e-13	2.38552e-09	5.56595e-09	1.8115e-10	6.12795e-09	3.1533e-11	8.40154e-12	1.40225e-09	2.06113e-09	4.30506e-08	9.54064e-09	8.67576e-09	7.25488e-10	1.72511e-08	1.22354e-10	1.60154e-08	1.37732e-08	7.23132e-09	3.02354e-07	3.59425e-10	4.03912e-08	1.89758e-10
CL	2.46983e-16	2.08536e-17	1.45215e-16	7.05825e-16	3.11985e-15	2.15176e-19	2.23195e-16	7.62558e-15	7.2069e-16	2.93283e-20	3.22013e-11	2.47339e-18	1.86508e-13	7.95423e-14	7.5637e-20	1.12603e-19	2.83605e-12	1.57288e-16	1.175e-14	1.69803e-15	1.82105e-14	2.50297e-19	6.00538e-15	1.17404e-14	9.65689e-18	1.78895e-14	1.1924e-23	3.00594e-15	5.32957e-21	4.97602e-13	2.64819e-16	1.67431e-11	4.51322e-18	1.79165e-19	1.59721e-16	2.94812e-14	2.50922e-19	2.98335e-16	1.5529e-15	5.35885e-17	4.516e-18	1.70311e-16	9.7218e-14	4.50575e-18	3.04033e-14	5.27536e-16	7.4139e-17	7.10519e-13	2.36186e-15
CLN	2.89667e-14	9.43916e-13	3.33348e-11	1.37913e-12	2.81695e-14	2.96775e-12	4.95208e-12	4.51016e-11	1.47547e-10	1.20652e-09	1.25926e-09	7.41121e-09	1.71024e-07	2.46108e-14	4.9491e-13	1.67778e-12	1.17231e-12	3.52671e-09	4.7788e-13	1.98494e-10	1.04019e-09	9.25241e-14	1.63223e-11	9.02234e-13	1.98686e-11	1.43925e-12	6.26414e-15	2.40118e-08	1.23673e-12	8.98772e-12	2.33799e-14	1.2819e-09	6.08648e-15	8.96944e-12	1.36157e-12	4.53397e-09	3.26845e-11	5.43528e-12	1.85826e-10	4.99327e-12	5.90366e-11	4.81053e-12	3.5391e-10	1.21554e-10	1.47167e-15	1.32712e-12	1.07233e-09	7.51166e-09	1.12797e-12
CLR	3.72995e-14	5.82757e-14	1.73676e-15	8.20621e-12	5.51896e-15	5.01798e-19	1.04903e-16	1.14576e-14	3.94233e-15	2.15346e-16	3.36275e-17	8.68142e-14	3.91158e-16	7.48216e-13	1.10045e-13	8.16402e-17	1.64235e-11	1.15811e-15	5.20183e-15	9.55303e-13	8.13218e-19	1.02575e-13	3.95794e-15	6.34833e-17	7.0388e-16	8.68311e-13	7.36043e-16	7.08669e-17	3.62082e-13	4.15891e-14	7.44914e-15	1.99051e-12	2.80684e-16	1.33308e-14	4.45358e-17	9.29701e-12	3.43778e-19	8.50191e-15	1.2865e-14	9.16786e-17	2.9133e-15	1.844e-12	2.4223e-13	8.14682e-17	1.25463e-14	1.03192e-14	4.85828e-16	2.50968e-10	3.16387e-14
CLS	4.71041e-14	4.05654e-14	5.70162e-17	1.97453e-18	4.39987e-11	1.44186e-14	3.52345e-14	3.7788e-13	1.57455e-17	3.65765e-16	8.72276e-11	1.92705e-14	9.30814e-16	2.28459e-15	3.37227e-18	5.80975e-14	1.58888e-15	2.30236e-18	1.07112e-12	6.82864e-14	3.86473e-17	2.33675e-15	5.85721e-19	6.38938e-15	1.03209e-15	7.83264e-14	1.47158e-15	2.63189e-14	9.09753e-16	1.27483e-12	9.18826e-14	1.00886e-10	7.35242e-14	5.97137e-19	9.99019e-17	4.68993e-18	1.21714e-16	3.33066e-13	4.83521e-11	3.19122e-13	1.02928e-14	2.80554e-16	1.38153e-16	6.46592e-13	5.09972e-11	2.35815e-09	3.50463e-14	8.4024e-14	2.66993e-14
CN	7.06823e-20	2.87977e-09	5.38119e-09	4.93511e-23	9.42114e-13	2.30846e-12	5.97462e-16	3.31544e-12	4.17905e-15	4.69195e-16	4.92928e-10	5.39632e-19	1.56946e-12	8.26538e-20	2.85793e-11	1.57538e-13	2.14124e-15	4.2837e-11	7.32554e-15	2.86595e-15	1.70603e-13	3.59775e-14	3.13064e-13	9.3649e-16	2.3908e-16	1.20889e-16	1.28861e-13	2.3626e-17	8.5298e-11	8.10416e-18	1.87498e-12	7.2001e-18	1.6416e-15	1.05824e-07	1.05751e-14	3.82325e-15	2.26854e-10	4.26286e-10	2.82518e-12	2.66818e-12	5.31752e-17	1.44178e-11	1.55458e-13	5.38152e-15	1.29396e-12	8.18881e-13	2.07404e-11	1.40975e-11	2.90787e-11
CNL	1.35614e-10	8.89917e-13	6.3628e-11	7.29126e-13	9.10377e-11	3.6253e-15	6.82154e-13	5.23336e-12	2.38188e-13	1.77477e-10	5.91984e-13	2.69023e-11	2.56093e-13	5.42251e-13	1.50722e-10	7.93328e-10	2.57843e-12	4.59984e-12	1.5917e-10	7.87569e-12	2.46629e-12	6.78085e-12	2.1182e-11	5.53171e-11	7.49786e-14	9.12657e-14	6.49513e-17	1.6914e-13	7.05771e-10	2.02494e-13	6.32857e-13	1.87073e-13	1.85875e-13	1.0735e-11	4.48369e-14	3.28378e-12	2.20644e-12	2.06781e-12	1.78076e-13	2.6075e-12	1.56894e-13	1.12593e-14	8.22373e-12	2.76724e-12	1.80834e-12	5.82178e-13	5.36819e-17	2.39477e-08	5.41912e-11
CP	7.00772e-13	9.23288e-14	1.88058e-15	1.46626e-11	5.44153e-11	4.35641e-14	2.23528e-12	3.23032e-09	2.57315e-11	1.7199e-11	4.85659e-12	1.5676e-11	1.40827e-10	8.45205e-15	1.34956e-09	1.16016e-11	1.0866e-09	4.52435e-08	8.31767e-10	1.66802e-11	2.38784e-12	1.31619e-07	3.8228e-10	6.62404e-11	4.7521e-12	2.92654e-11	1.97958e-13	3.02188e-12	7.07904e-11	5.83472e-15	5.63426e-17	3.72369e-13	2.84022e-09	4.36706e-13	3.22379e-14	4.73584e-14	5.97879e-12	4.01295e-09	2.05516e-10	8.35487e-13	1.20689e-13	1.76998e-12	4.20048e-08	1.29213e-13	8.28636e-14	5.01159e-08	9.98544e-08	1.36637e-09	7.13508e-11
CPK	2.05046e-10	2.10881e-09	1.63964e-11	5.83242e-14	5.638e-11	8.87815e-10	1.00063e-10	1.64314e-11	1.4239e-12	3.71178e-12	5.73188e-11	6.30214e-11	7.42882e-11	1.67227e-12	5.07388e-11	4.96657e-10	1.0122e-11	8.01438e-11	1.00441e-09	5.5896e-10	5.98522e-12	6.89934e-11	1.83033e-09	1.83363e-10	6.26445e-10	6.0247e-12	6.10442e-12	1.64584e-10	1.48942e-11	3.62252e-12	1.54782e-11	5.28819e-11	5.10469e-09	2.89548e-12	1.37934e-10	5.56857e-11	1.18187e-12	1.54782e-11	1.22726e-10	1.31218e-12	3.82849e-12	1.87437e-10	1.11274e-11	4.649e-12	1.02839e-08	4.42339e-13	2.17672e-10	3.64243e-09	6.24033e-10
CPN	6.55803e-09	9.88404e-10	1.28849e-08	2.25615e-09	7.45335e-10	2.66386e-09	7.25704e-10	2.09285e-08	1.54381e-07	8.39413e-10	2.25318e-10	1.71498e-08	1.19189e-12	2.29882e-13	5.98201e-09	5.84681e-11	9.56678e-10	6.38641e-11	7.84641e-09	6.38641e-11	1.3745e-07	7.61095e-09	2.6325e-09	1.63776e-11	2.53781e-10	1.51515e-11	1.99143e-08	2.65335e-10	1.94398e-09	2.5187e-13	2.24117e-13	1.91281e-11	7.15344e-10	6.7117e-10	4.34797e-12	2.03878e-11	2.03878e-11	2.87107e-09	5.03709e-10	1.02904e-12	7.06729e-11	2.07363e-10	2.49085e-09	2.09523e-11	1.79447e-11	1.94012e-09	8.49783e-10	1.28346e-07	2.0585e-08
CSK	6.67287e-12	5.27017e-13	1.71481e-12	2.10022e-09	5.09035e-11	1.39231e-11	2.17951e-10	2.68822e-15	3.40197e-11	1.43794e-11	4.19768e-10	1.45174e-13	3.71364e-14	4.32574e-13	4.74052e-11	9.776e-11	8.45315e-11	1.3285e-12	2.16271e-15	1.67736e-09	1.631e-13	4.14739e-14	7.26873e-16	2.94094e-12	9.02682e-11	5.09984e-10	1.10425e-13	3.33166e-14	2.15782e-11	6.34523e-11	1.94957e-13	2.2e-12	9.99354e-14	6.10512e-12	9.88037e-11	1.12577e-12	1.03313e-09	1.4344e-11	1.47732e-12	1.41583e-11	4.56794e-13	1.02874e-11	1.72132e-10	3.14574e-11	5.89656e-11	6.33082e-13	2.67886e-11	3.56022e-11	6.26634e-11
CSS	1.18535e-10	1.13408e-15	8.79197e-12	4.57816e-12	1.87768e-14	6.82768e-10	1.18176e-13	1.07683e-15	1.04294e-16	1.2257e-16	2.42528e-15	1.68837e-12	1.64819e-13	9.27564e-15	8.15942e-13	9.18605e-13	6.10864e-15	3.4136e-14	1.39382e-11	1.51914e-16	8.27924e-15	4.69096e-11	9.74993e-15	5.48786e-13	2.72904e-08	1.17873e-10	4.83489e-12	2.84539e-12	2.35344e-13	2.07671e-13	2.43354e-11	1.05895e-14	1.14416e-13	1.66625e-12	2.41909e-10	2.94404e-13	2.03681e-15	2.85538e-11	2.41032e-13	1.20038e-09	3.60733e-14	1.31717e-11	9.96563e-14	8.04083e-18	3.07567e-12	2.13134e-11	4.70879e-15	1.23641e-12	3.50674e-15
CVS	2.50326e-12	4.53569e-13	9.85417e-14	1.21316e-14	4.98821e-14	1.17498e-15	8.36605e-19	3.22891e-11	1.3218e-14	6.05788e-17	3.15892e-13	9.19204e-18	3.33394e-15	7.20805e-14	3.76638e-13	1.76559e-14	8.892e-16	1.22388e-17	7.61988e-13	1.11866e-18	7.87799e-17	1.36975e-12	5.48369e-16	3.07779e-16	3.64203e-18	8.40542e-19	2.09675e-15	6.48384e-14	3.11394e-13	1.84527e-18	1.02732e-12	4.32967e-15	9.0396e-17	3.18473e-16	2.72483e-10	6.60995e-14	3.13582e-14	2.3425e-13	1.98224e-17	5.48479e-13	3.19807e-17	3.71726e-14	8.30417e-13	1.41162e-14	1.67969e-17	4.65823e-15	8.24619e-16	1.76567e-12	4.08072e-15
DAYM780201.lag1	8.72831e-35	1.90487e-32	1.95917e-31	2.99306e-30	4.41539e-33	4.32472e-32	4.14582e-35	3.83722e-33	1.37858e-38	3.28449e-31	1.08556e-39	1.741e-37	2.24579e-31	6.75705e-32	1.10424e-35	3.56198e-26	1.09851e-40	4.05218e-35	1.07743e-28	6.15689e-35	1.81562e-33	7.74982e-29	1.3958e-39	1.12132e-40	1.54176e-33	2.2438e-38	7.27757e-30	1.63053e-38	8.10879e-33	2.24335e-33	4.34176e-31	1.16356e-40	4.68399e-33	4.532e-31	1.00948e-28	7.9649e-42	8.51726e-37	1.39704e-41	1.41771e-38	7.70193e-33	1.91884e-32	4.878e-33	1.25272e-28	5.0925e-32	3.64372e-33	6.08714e-35	2.5049e-32	1.55934e-27	5.67308e-34
DAYM780201.lag1.1	3.23754e-17	1.59423e-18	1.20267e-20	7.84062e-17	1.27281e-23	5.54919e-20	3.13429e-21	1.06215e-19	1.00387e-22	1.87619e-19	4.72799e-28	1.0778e-20	1.86573e-19	1.17148e-18	5.25059e-23	1.50561e-14	2.99585e-25	3.77393e-23	8.25826e-15	3.30373e-21	8.66925e-19	5.4714e-15	1.96061e-25	4.29686e-24	6.3381e-19	1.44359e-22	3.42182e-18	1.10301e-24	3.19914e-21	9.34324e-22	8.92174e-17	6.74297e-25	6.65995e-19	8.16154e-19	2.34536e-16	7.67554e-24	8.67777e-21	2.09566e-26	4.42664e-25	2.97394e-18	9.56814e-19	1.8106e-21	5.93276e-19	2.23255e-18	1.42954e-20	1.83781e-22	5.12612e-19	1.31264e-16	6.98314e-21
DAYM780201.lag1.2	1.76781e-18	8.55123e-20	3.09154e-22	3.13044e-18	4.7186e-25	1.94306e-21	9.10974e-23	2.02471e-21	1.96639e-24	6.14596e-21	1.38356e-29	2.38804e-22	9.46427e-21	5.92271e-20	1.26386e-24	5.99408e-16	6.16249e-27	2.7969e-24	6.74458e-16	1.38797e-22	1.58546e-20	2.47413e-16	2.34629e-27	1.16267e-25	1.55835e-20	4.15151e-24	1.77421e-19	2.53467e-26	1.44359e-22	3.45306e-23	2.91037e-18	2.83321e-26	2.42351e-20	9.1754e-20	1.14318e-17	1.37535e-25	3.50613e-22	4.40325e-28	8.58186e-27	1.42626e-19	6.5764e-20	5.36398e-23	1.65054e-20	4.32302e-20	5.89518e-22	7.6517e-24	1.44608e-20	6.19411e-18	2.80015e-22
DAYM780201.lag13	7.50777e-14	2.48292e-08	1.52008e-14	2.30087e-11	5.51783e-20	2.00934e-14	3.33491e-15	5.90441e-16	1.28254e-12	4.54815e-13	3.20858e-12	4.82736e-14	2.31184e-14	4.63839e-09	3.66877e-15	2.12379e-12	3.44733e-17	8.13951e-15	3.09104e-15	3.61165e-13	1.74532e-13	8.35296e-18	2.61589e-13	5.17904e-14	1.93885e-18	2.94107e-12	1.69065e-11	1.15062e-12	1.8133e-12	9.62984e-21	6.17737e-15	4.43282e-11	9.71605e-14	4.48171e-15	2.96951e-17	1.47916e-19	2.94107e-12	9.99663e-19	3.78752e-13	8.18693e-13	2.89386e-11	3.12591e-12	5.49516e-13	6.59949e-12	5.66103e-11	6.87167e-14	8.74992e-16	6.84522e-10	1.90381e-15
DAYM780201.lag16	1.75789e-16	6.6263e-17	6.24269e-17	3.89564e-16	5.91802e-14	5.19472e-13	3.05339e-15	5.95666e-15	3.34208e-22	7.73839e-14	6.71328e-14	1.49746e-18	9.75345e-11	2.72512e-16	6.21748e-13	5.07721e-12	3.32211e-22	1.13684e-15	1.17524e-20	1.14845e-16	1.54299e-18	3.77139e-19	9.2479e-21	2.11419e-09	9.04706e-20	1.8575e-14	1.3296e-16	3.05015e-14	5.23721e-15	1.46291e-23	1.21211e-19	1.8739e-13	7.35401e-15	4.23018e-24	3.76728e-22	1.57373e-15	2.74738e-21	2.3193e-19	3.81636e-14	4.98502e-21	1.7447e-19	1.12991e-19	2.48083e-12	2.04309e-14	3.81264e-22	5.34206e-17	2.06804e-24	2.95121e-13	1.84408e-13
DAYM780201.lag2	8.33437e-13	6.5738e-14	3.38039e-12	6.91741e-11	4.96794e-10	4.96687e-17	2.21601e-10	6.6272e-16	2.77478e-15	5.99824e-13	3.90073e-12	2.62882e-15	6.21563e-14	1.02565e-09	1.51775e-17	2.01177e-13	2.96951e-17	7.56861e-12	2.07554e-15	8.20863e-12	1.05365e-13	4.74874e-14	2.5523e-12	1.61318e-15	1.53904e-15	1.64267e-18	1.57531e-10	1.70765e-15	3.73477e-11	1.39087e-17	2.30811e-12	4.20414e-17	2.28638e-16	2.04002e-15	1.47004e-14	1.55429e-17	2.87179e-15	2.07251e-13	9.38353e-16	9.91846e-15	1.06099e-13	2.24513e-13	1.55241e-13	1.34593e-13	7.22071e-12	3.69634e-11	1.38746e-18	5.21795e-09	1.47746e-11
DAYM780201.lag3.1	3.09544e-13	4.1266e-12	8.97575e-18	5.2118e-15	1.18826e-13	2.0294e-11	2.12379e-12	8.14465e-14	5.10675e-14	1.95726e-13	4.93032e-14	9.50906e-12	2.7068e-13	1.38975e-11	1.96684e-12	2.92999e-14	1.37617e-09	9.62766e-10	2.83266e-17	1.22469e-16	4.90057e-10	1.70065e-14	3.40988e-12	2.5399e-15	4.47873e-11	6.56115e-13	2.36915e-11	4.047e-12	1.79766e-10	1.74458e-10	6.54647e-13	3.13813e-11	3.38846e-11	8.05941e-11	2.37469e-12	9.22717e-15	1.8133e-12	5.20337e-14	4.68629e-11	3.65278e-13	6.34764e-14	1.40425e-12	1.48945e-13	8.69554e-09	7.53398e-15	4.07337e-11	8.77955e-10	1.63969e-10	8.07803e-13
DAYM780201.lag3.2	3.9689e-12	9.46151e-11	5.65744e-16	1.09339e-13	5.51012e-12	3.6751e-10	7.19078e-11	1.56461e-12	6.51719e-13	5.01197e-12	1.03204e-12	1.85601e-10	4.70807e-12	4.85299e-10	8.84898e-11	4.58936e-13	1.84901e-08	2.08546e-08	3.23042e-15	5.67441e-15	7.63062e-09	7.08015e-13	1.28613e-10	2.35004e-13	5.12534e-10	2.12954e-11	2.22483e-10	4.48796e-11	2.34872e-09	2.35313e-09	3.09285e-11	9.42651e-10	7.14278e-10	1.01005e-09	5.23648e-11	1.19652e-13	7.08885e-11	1.09825e-12	1.43767e-09	6.14843e-12	1.42613e-12	3.22395e-11	3.11912e-12	1.2613e-07	5.10202e-13	5.95352e-10	1.078e-08	3.72272e-09	4.78372e-11
DAYM780201.lag4	1.019e-24	2.08034e-19	3.14061e-19	3.11605e-20	7.08799e-17	1.605e-23	5.68412e-23	1.10278e-22	6.50842e-26	1.64007e-23	7.95539e-25	1.11269e-21	1.80527e-21	1.16316e-21	8.52072e-26	3.20223e-19	1.17513e-24	1.00515e-18	3.11332e-25	1.31282e-23	7.19561e-22	6.80765e-25	1.29081e-22	7.21928e-20	8.3737e-24	7.25141e-21	2.14516e-19	2.19251e-20	2.17875e-18	7.54545e-23	3.68919e-25	3.93588e-20	6.62231e-18	2.4514e-20	3.13029e-23	1.6388e-22	2.83691e-25	9.93933e-28	2.04498e-17	5.30317e-20	1.15754e-22	1.80474e-23	1.39299e-20	7.7315e-18	1.28103e-25	1.40249e-28	2.72406e-26	6.65934e-15	1.067e-12
DAYM780201.lag4.2	6.23144e-13	1.07595e-09	1.71157e-09	4.61277e-10	4.20629e-09	7.05014e-14	6.92346e-13	3.32864e-13	1.91991e-12	1.89477e-12	1.08433e-15	1.27839e-10	1.78582e-13	2.87177e-13	2.92595e-16	4.70376e-10	2.3335e-12	2.46501e-11	3.72798e-13	7.88206e-13	1.63641e-10	2.49933e-13	8.42804e-11	1.32383e-11	9.40841e-12	2.96385e-08	1.28096e-10	9.22946e-10	1.01782e-09	9.09131e-13	1.08583e-13	2.07869e-09	2.4339e-09	2.53805e-11	3.98078e-13	6.78595e-12	4.55842e-13	1.90381e-15	3.90242e-08	1.41076e-10	1.39269e-11	1.08081e-13	2.45215e-10	8.31894e-10	2.91785e-13	8.00423e-18	7.35401e-15	9.28714e-07	8.24712e-07
DAYM780201.lag7	1.75004e-14	3.97368e-11	2.24156e-14	1.64851e-11	4.90855e-06	1.05494e-16	1.70322e-10	3.55349e-12	8.44911e-16	7.20545e-11	9.19407e-10	2.89269e-17	2.27301e-12	1.16862e-12	4.86309e-11	1.07358e-15	4.35356e-16	5.21502e-11	6.82967e-16	5.45823e-13	3.0845e-10	4.07179e-13	5.76777e-14	4.43282e-11	8.69436e-17	3.75042e-09	2.07725e-13	1.81588e-11	1.00265e-12	9.50525e-13	3.58241e-10	1.22245e-14	3.60348e-13	2.77592e-11	1.45681e-10	6.20355e-13	7.07532e-19	1.84365e-15	6.28863e-14	2.35541e-13	7.06966e-17	1.12676e-13	7.40361e-14	2.77248e-10	1.31046e-14	2.4339e-09	2.94762e-10	5.87313e-10	2.43152e-07
DC	2.84226e-24	5.03341e-24	5.25948e-17	8.73108e-26	2.51017e-23	1.74776e-29	1.58693e-25	1.05726e-17	2.34776e-36	2.67597e-23	1.20686e-21	5.47044e-16	2.47286e-20	5.98424e-17	6.02827e-21	5.18609e-25	9.24712e-24	1.72823e-22	1.13282e-29	2.49961e-20	1.43733e-22	8.18336e-19	2.83751e-23	1.25132e-21	2.79457e-33	6.68195e-19	4.472e-25	2.46784e-26	5.73229e-17	9.70572e-24	3.72209e-27	5.37911e-18	6.04666e-17	1.1826e-27	1.69182e-19	9.59786e-31	5.21051e-17	7.58246e-19	7.44347e-24	1.97319e-25	3.13751e-20	3.8162e-21	7.98141e-28	2.35983e-26	6.0869e-24	6.28098e-20	9.34869e-17	4.16577e-17	1.75471e-24
DCP	1.0052e-13	2.69157e-17	9.62084e-15	6.77827e-16	2.06619e-12	1.40685e-14	2.21673e-15	1.00842e-14	5.20688e-14	4.66764e-14	6.59406e-14	1.60506e-13	1.91512e-10	1.92406e-12	4.54165e-14	3.64352e-15	2.56127e-11	7.18532e-13	2.04401e-16	9.0924e-15	1.22822e-14	6.16036e-14	3.48923e-15	4.71664e-12	2.29314e-15	1.03971e-14	1.19977e-14	1.13943e-14	6.39744e-13	1.97343e-11	1.67789e-13	2.402e-12	7.48049e-12	4.69734e-12	2.82279e-15	1.09434e-13	1.84366e-15	5.08971e-14	1.68499e-16	1.92489e-13	2.7028e-15	7.35989e-12	1.78087e-14	1.64901e-14	3.00543e-15	5.78744e-12	2.56094e-14	3.1462e-15	8.1817e-16
DCR	6.24375e-07	9.87717e-09	1.22478e-07	1.13045e-10	4.27105e-09	1.00942e-09	3.69548e-09	3.5352e-09	3.45023e-10	1.39971e-08	4.89421e-09	3.31875e-07	9.10804e-11	8.61687e-09	9.78929e-11	2.76195e-09	2.81201e-10	3.51629e-08	2.13055e-11	3.30036e-08	3.75984e-08	4.91382e-09	1.57906e-06	3.82864e-10	2.2592e-11	4.02134e-09	2.64529e-10	1.44286e-09	3.39082e-10	4.32147e-10	3.19131e-08	2.54835e-07	3.1207e-07	4.30285e-10	3.59572e-08	1.21111e-09	8.82121e-09	1.33898e-08	4.67835e-08	9.30015e-10	1.33125e-08	1.47931e-09	1.48295e-08	4.75908e-09	1.17631e-08	3.10646e-09	3.98914e-09	1.26605e-08	1.26117e-08
DDI	9.68704e-13	1.1867e-12	1.44992e-12	1.64791e-11	2.9974e-12	1.2397e-13	5.91375e-10	1.07636e-14	2.10938e-14	3.34762e-12	1.26993e-16	1.27548e-12	4.58654e-12	1.32766e-12	2.22594e-14	1.71724e-14	1.84774e-10	1.26973e-14	1.43114e-12	4.13352e-11	6.93808e-10	1.38317e-16	3.80538e-13	2.57382e-16	2.75618e-13	2.39472e-11	8.2572e-12	7.71965e-10	6.79191e-16	1.66008e-14	4.54236e-09	4.27832e-13	1.23055e-10	3.19092e-14	2.34169e-14	8.96516e-11	1.25388e-12	2.66931e-13	1.61313e-10	1.52733e-13	9.71235e-11	5.27233e-12	3.65252e-11	2.24774e-08	1.40316e-09	1.87184e-11	5.78385e-16	2.9319e-10	2.79425e-12
DDL	7.52139e-13	1.08197e-11	2.85888e-17	4.58325e-14	1.08456e-12	7.99737e-14	1.88959e-12	9.28381e-15	3.31091e-11	1.69099e-13	1.90422e-12	4.51563e-12	2.59254e-12	2.31819e-17	2.15785e-14	3.41912e-16	1.90707e-15	1.73786e-17	1.47494e-14	7.34426e-12	2.05178e-15	1.57657e-14	1.28965e-14	9.35153e-22	3.14358e-12	1.4973e-09	1.83185e-11	2.80774e-13	3.45685e-14	6.13999e-12	7.47562e-13	4.7282e-13	2.07808e-12	4.79941e-15	5.90128e-16	7.67262e-14	1.5406e-13	3.22718e-14	5.76192e-12	5.57813e-14	5.50272e-18	3.88017e-12	3.93347e-16	1.19719e-13	6.22666e-12	5.32666e-15	5.10779e-14	2.6245e-11	4.91252e-14
DDV	3.68378e-37	1.58551e-32	1.31605e-30	8.69076e-40	1.19632e-26	7.65978e-31	1.26666e-30	2.35511e-34	8.19966e-34	9.25814e-29	1.11512e-35	5.60375e-33	1.10389e-33	7.58616e-26	6.60832e-32	4.14241e-33	3.65789e-30	6.20798e-30	1.42119e-30	3.07991e-29	4.0066e-36	1.75034e-31	3.12263e-29	4.09979e-30	1.6964e-35	1.39574e-32	2.15447e-28	2.78692e-29	3.0187e-34	5.10742e-38	1.37603e-33	1.94325e-40	2.79419e-33	9.9237e-35	1.25315e-36	5.41192e-34	6.42148e-37	1.831e-30	3.38191e-35	1.67701e-29	2.44362e-27	1.93335e-26	3.39243e-36	3.74944e-38	9.52048e-37	1.90634e-30	3.25425e-31	7.58036e-34	7.23486e-31
DEL	7.18723e-21	3.47661e-21	6.47834e-14	4.49159e-23	3.14763e-18	5.51922e-20	5.23103e-24	1.61886e-19	7.99341e-27	1.00933e-15	8.60427e-23	8.70651e-20	1.09826e-19	2.31196e-15	4.97561e-18	1.094e-12	8.85719e-17	1.37755e-16	1.98851e-16	4.87152e-19	2.91032e-22	2.16941e-20	9.21122e-17	4.89465e-18	1.31969e-17	4.58844e-25	3.21923e-17	1.95557e-24	1.00499e-18	6.07245e-23	3.95988e-22	4.41062e-26	1.10809e-24	1.43128e-19	3.12851e-18	3.21646e-18	7.43638e-19	1.99334e-21	1.64174e-20	2.93976e-10	1.12813e-24	3.05436e-23	1.26188e-18	1.77492e-14	5.13906e-15	4.36259e-21	1.04899e-20	7.30772e-23	9.504e-22
DF	2.45763e-12	1.63458e-19	4.63494e-16	5.14759e-13	2.7969e-12	1.12511e-12	1.21608e-13	1.28106e-15	1.0164e-16	8.53709e-14	3.81988e-16	1.72273e-18	5.47676e-17	1.62811e-11	7.79791e-15	6.90604e-17	3.88166e-16	2.43745e-11	1.16878e-10	4.88633e-09	3.68912e-13	6.04694e-17	1.90491e-16	6.23489e-12	2.4962e-13	8.75857e-17	1.48355e-18	2.15651e-10	1.30045e-15	4.67803e-17	3.05977e-15	5.25883e-13	8.52104e-17	6.04051e-14	5.39403e-17	2.79933e-19	1.39749e-09	2.8348e-11	4.19619e-17	1.66729e-07	2.77057e-10	6.40714e-18	4.42632e-14	1.12704e-15	4.38701e-20	3.08231e-12	5.55259e-15	5.93859e-14	8.75355e-10
DFD	8.94133e-10	3.66453e-07	2.71579e-08	1.88563e-07	1.08445e-10	1.92453e-10	3.78745e-08	6.24325e-10	2.71163e-08	1.28613e-09	1.90669e-06	2.30754e-10	5.63802e-10	1.16115e-12	1.5763e-07	5.31079e-07	5.734e-08	5.00187e-09	5.4072e-08	6.2299e-08	1.89441e-06	7.30785e-09	1.30871e-07	1.64978e-09	2.898e-07	1.15297e-08	2.69293e-09	2.127e-11	8.61087e-10	7.49077e-11	6.90835e-09	6.62131e-08	6.13898e-13	1.31909e-09	5.80333e-09	4.21726e-10	3.02245e-07	6.0209e-10	1.21553e-07	6.12581e-10	4.89717e-06	2.71375e-09	1.24064e-06	1.66088e-09	1.51331e-13	7.66298e-10	3.83171e-12	9.04966e-09	5.12499e-09
DFG	2.99714e-16	2.62991e-19	1.43527e-16	3.34192e-19	2.55262e-15	5.80537e-19	4.84337e-16	2.67291e-18	5.2525e-20	5.77656e-18	1.13877e-17	2.49179e-18	1.86422e-19	3.49987e-14	3.14762e-18	2.4241e-19	9.57845e-18	5.04313e-17	1.21295e-16	5.21554e-16	1.76918e-15	1.22483e-21	1.44503e-18	1.59252e-15	3.27036e-17	1.15737e-16	4.85258e-18	2.28843e-18	5.0439e-20	1.10258e-13	4.55712e-23	5.42411e-18	3.75272e-18	5.40754e-16	9.84056e-18	4.58848e-20	1.32278e-16	1.03842e-14	1.04378e-16	7.37057e-16	9.60786e-15	2.00846e-21	2.93569e-19	8.2891e-17	1.52318e-17	1.35193e-14	2.7414e-17	1.27412e-18	1.03496e-18
DGL	8.37536e-11	1.12964e-09	8.30869e-09	7.50829e-11	2.0673e-10	2.29425e-11	6.22756e-09	4.13123e-13	2.3875e-16	5.40574e-13	2.10002e-10	3.11851e-13	2.75545e-11	1.48966e-07	8.94595e-11	1.78153e-11	4.79538e-08	3.83327e-12	2.03293e-13	5.00534e-12	1.83636e-06	2.42857e-10	5.77535e-10	6.52311e-09	2.95741e-10	2.92394e-08	1.68311e-10	9.19545e-11	9.55855e-12	1.77895e-09	1.02753e-08	9.07979e-13	6.76879e-13	3.59465e-11	4.30681e-10	1.07917e-10	2.97688e-11	1.45065e-10	1.86077e-06	8.96572e-09	3.58097e-12	2.21656e-08	3.51704e-10	3.90767e-12	7.93306e-13	5.6081e-11	3.28682e-09	1.87199e-12	3.19736e-09
DI	1.07436e-24	1.65474e-25	4.68011e-31	2.42114e-24	1.67662e-23	1.94813e-26	2.89056e-21	2.87498e-27	4.09385e-27	7.82855e-24	9.87299e-26	4.54761e-37	1.56028e-35	2.33427e-22	3.29642e-22	1.54983e-28	4.44607e-23	1.0872e-32	6.47868e-27	1.77265e-26	9.36422e-22	1.38589e-24	1.2481e-25	1.33287e-29	1.6811e-28	2.59663e-29	6.35154e-29	3.82106e-25	6.37376e-32	6.29684e-37	3.08962e-24	2.86203e-24	2.15802e-24	9.36847e-32	1.63523e-29	1.14144e-26	3.10536e-28	1.66412e-25	1.14497e-27	2.90993e-33	4.52309e-26	2.61711e-28	7.39994e-28	7.89397e-27	5.86831e-27	1.0234e-21	5.95448e-29	1.54713e-27	2.30448e-28
DIA	4.75166e-17	3.80941e-12	1.13439e-18	3.43633e-12	4.63768e-13	8.3852e-13	1.48642e-18	1.06808e-11	3.37884e-15	7.29596e-15	4.70111e-12	1.58053e-16	5.52688e-17	1.51531e-11	2.1456e-12	5.28686e-09	2.09741e-12	7.92942e-19	1.13571e-15	3.34565e-12	3.01199e-14	1.33217e-12	9.51161e-13	4.04415e-17	4.1426e-13	8.76949e-14	2.2542e-17	9.4387e-15	2.36919e-14	2.19828e-14	1.09409e-11	1.68886e-16	2.38561e-11	8.13341e-19	1.42377e-13	5.43596e-13	9.4165e-16	9.01389e-12	3.22669e-11	2.82111e-13	1.34275e-09	2.94802e-15	2.87639e-15	1.36522e-16	8.04482e-15	2.69353e-11	2.68572e-15	3.30054e-12	4.50534e-13
DIK	7.0059e-17	3.26776e-18	3.47886e-17	2.24054e-18	2.45672e-17	1.59669e-19	5.52139e-17	2.00128e-17	2.93916e-15	5.86049e-17	5.34837e-18	2.10957e-19	1.87795e-20	4.62488e-17	2.05671e-20	3.41439e-16	1.05969e-15	1.76906e-22	1.70054e-19	1.83951e-22	1.20828e-19	3.7281e-22	3.68349e-18	5.26081e-20	1.0976e-19	3.4785e-20	7.68797e-16	1.50936e-16	1.97959e-20	5.30427e-19	2.27017e-15	1.12973e-13	4.20113e-23	7.66045e-19	1.31554e-20	5.90808e-16	4.56378e-18	3.69122e-18	5.03837e-18	2.56029e-18	4.34034e-19	8.07968e-19	4.18112e-16	7.64522e-20	3.82594e-23	1.53456e-21	6.85713e-19	1.58001e-19	2.65553e-22
DIL	3.57281e-16	3.71169e-12	8.45846e-14	9.01973e-16	6.61894e-11	6.81876e-13	4.25835e-14	3.25649e-16	4.85882e-16	1.45172e-12	2.0282e-14	3.31591e-19	2.49075e-16	3.86212e-17	4.80316e-16	6.99062e-14	3.20964e-12	4.62693e-17	3.30674e-14	7.31841e-15	9.77597e-14	1.46051e-13	5.04165e-12	3.98231e-19	1.26525e-11	5.65345e-14	9.51288e-12	8.07275e-12	1.03434e-12	1.55503e-17	8.05407e-14	2.53148e-15	1.17692e-14	2.75482e-13	1.04342e-14	1.34818e-11	7.34305e-15	5.80687e-12	1.06567e-13	3.13436e-15	8.37574e-11	7.78888e-16	1.09549e-14	3.12599e-11	9.26084e-14	6.42994e-15	1.18018e-13	1.8334e-11	1.82282e-18
DIQ	7.2879e-11	7.15091e-14	2.51784e-13	2.91519e-10	1.31692e-15	2.55541e-10	8.21652e-10	9.25673e-14	1.10431e-10	2.37402e-10	3.90031e-10	8.59398e-11	1.17538e-12	1.51994e-12	2.28952e-11	4.79942e-16	3.644e-15	1.8355e-12	1.58466e-09	3.58271e-12	8.24265e-12	1.17028e-10	1.74372e-12	4.75695e-10	5.68926e-13	2.01253e-12	5.94895e-08	5.61856e-10	7.47283e-15	3.97035e-12	3.17244e-08	3.24253e-08	2.76697e-13	9.90771e-13	1.08477e-13	9.92253e-12	4.80768e-12	6.47363e-10	2.70392e-13	1.09049e-11	7.14111e-12	5.87183e-08	1.14942e-12	8.39923e-13	2.89123e-11	4.51009e-11	4.98069e-11	2.27231e-11	6.39195e-14
DIS	2.05237e-10	3.41974e-12	2.15538e-11	1.85547e-13	2.17275e-10	6.40228e-11	2.04672e-10	1.09116e-13	2.28541e-09	9.34369e-14	5.70939e-12	2.06619e-12	1.31582e-11	2.71276e-16	9.73208e-14	3.32419e-12	3.83526e-10	6.31473e-15	1.52071e-14	8.01743e-13	6.69262e-12	1.24482e-10	6.2079e-11	4.88856e-14	3.54508e-17	6.1695e-13	1.99826e-11	5.03089e-11	9.52418e-16	1.40993e-14	2.81657e-09	3.48665e-15	1.53759e-12	1.54583e-11	6.5546e-13	7.84258e-15	1.18118e-09	1.24062e-08	3.83285e-16	3.32551e-13	2.22148e-15	1.49671e-13	4.03907e-13	1.9776e-08	6.08048e-14	6.13896e-08	4.07799e-11	3.39789e-14	6.55263e-13
DIW	8.80357e-18	1.13676e-22	5.28652e-22	1.08854e-22	1.7688e-20	1.81926e-19	7.24384e-23	3.07079e-19	1.77625e-23	4.2574e-20	1.91031e-19	2.9592e-22	1.12014e-20	5.94398e-20	4.43647e-22	1.14796e-19	1.85678e-23	6.09355e-20	9.86235e-21	6.29743e-22	5.90943e-22	1.28499e-20	2.85185e-21	4.05288e-22	1.57424e-20	1.08266e-22	1.08266e-22	3.64785e-21	1.77579e-18	4.12906e-22	5.57185e-20	1.54065e-18	4.16216e-22	3.51803e-21	4.07735e-19	2.74296e-21	3.73712e-19	6.60488e-22	6.63049e-20	2.19358e-21	1.09445e-22	8.92689e-20	1.44902e-21	3.9993e-22	2.48519e-21	5.75128e-18	3.23822e-21	6.27796e-20	9.08874e-19
DKL	1.09694e-11	2.58934e-14	6.13044e-09	4.10204e-12	6.50586e-14	1.87808e-12	2.79355e-11	1.33898e-09	7.52499e-12	2.04581e-12	6.2756e-12	1.50121e-15	2.3062e-11	2.16947e-18	2.56056e-10	8.07597e-14	2.46978e-08	2.86959e-12	1.0733e-13	1.45558e-11	4.10248e-14	8.3847e-11	2.0434e-13	1.33586e-10	9.0381e-12	4.98343e-13	4.66201e-08	3.48914e-10	1.27224e-09	4.30567e-13	3.39799e-12	7.197e-10	1.00514e-15	2.17225e-10	3.762e-14	9.25699e-14	4.09902e-13	2.0795e-09	7.83794e-11	1.06563e-10	3.51321e-11	6.49232e-13	2.3424e-15	4.08898e-17	8.83028e-14	9.06797e-14	2.27945e-12	3.47756e-12	2.18324e-10
DL	1.48091e-29	1.85296e-29	2.18648e-32	6.67759e-27	1.64944e-33	5.96464e-25	3.76385e-25	3.3242e-26	1.13566e-30	4.61428e-24	5.23357e-26	3.28643e-24	1.7617e-23	2.6399e-22	1.37244e-29	2.09752e-31	2.16602e-27	1.03126e-32	2.63057e-24	2.72608e-25	1.95786e-31	4.81389e-28	6.20823e-30	4.63156e-33	3.97575e-26	1.76661e-23	7.37525e-26	8.10986e-31	1.43159e-30	1.70032e-28	2.5688e-20	6.43338e-29	1.95537e-27	1.31648e-30	1.47591e-27	1.94104e-32	1.25977e-33	2.85975e-30	1.83392e-32	1.94112e-30	1.48114e-32	9.85108e-29	3.29488e-35	5.52006e-26	4.8551e-25	1.51923e-34	3.66264e-27	1.89278e-25	1.11687e-24
DLA	1.30013e-12	5.97089e-10	2.87719e-09	4.57521e-13	7.37353e-14	1.46438e-10	1.18005e-09	1.21228e-13	2.03124e-12	1.39784e-17	1.21713e-10	1.67154e-13	2.64293e-12	2.63753e-08	1.01822e-13	6.89757e-11	2.85913e-10	8.18693e-20	7.30979e-13	4.92464e-10	5.66682e-15	2.87785e-15	1.34473e-11	1.90262e-11	2.43268e-14	2.11024e-13	5.26796e-13	9.30859e-15	8.30471e-12	4.33757e-14	8.97402e-11	2.04793e-12	7.02559e-13	6.79517e-14	3.71814e-10	1.93049e-13	7.0128e-14	7.34682e-18	5.93089e-11	9.58125e-11	1.81519e-12	2.36689e-08	2.07817e-10	1.1297e-10	5.35347e-14	3.64551e-11	2.05639e-14	2.59022e-13	2.36186e-12
DLE	7.70868e-19	6.81498e-14	2.10398e-18	1.17351e-18	4.92307e-21	2.73114e-17	9.86758e-16	5.47625e-17	1.18237e-15	5.03088e-15	8.77879e-16	4.243e-20	1.25823e-15	3.27569e-15	3.09277e-19	3.10398e-19	1.86456e-16	1.43823e-19	2.36881e-13	2.43431e-18	6.40406e-17	2.264e-15	8.18502e-17	1.26359e-12	2.97563e-19	4.42533e-16	1.50844e-16	5.8274e-18	1.36184e-18	2.84615e-17	5.30322e-15	5.87558e-19	2.68257e-19	5.1837e-18	3.0568e-12	4.75417e-15	8.05743e-14	7.03184e-18	1.01131e-22	9.25342e-16	6.72596e-19	4.77213e-16	5.8751e-24	1.97717e-14	4.84465e-14	1.13365e-17	7.96284e-15	5.42202e-14	1.31651e-17
DLG	4.08284e-17	1.81524e-12	6.92909e-10	2.48729e-12	1.76874e-16	1.65686e-13	6.12393e-12	2.57018e-08	3.10149e-11	7.18034e-11	2.53795e-14	1.13909e-09	2.49364e-15	7.69941e-16	3.27e-10	7.15481e-10	5.31868e-10	1.54411e-12	1.01517e-08	3.46728e-14	1.24207e-13	1.51261e-13	5.52108e-12	2.03669e-13	3.48006e-15	5.73257e-13	1.31225e-10	2.47564e-12	1.76552e-12	4.0914e-14	4.07578e-11	6.73204e-14	1.71257e-11	1.32743e-08	4.74685e-10	1.53096e-15	9.04125e-15	3.46262e-14	1.71617e-12	3.48815e-12	3.19565e-12	3.96535e-10	2.69916e-18	5.99389e-11	1.64976e-11	1.23448e-12	5.27852e-12	2.10758e-12	5.79629e-13
DLI	1.66611e-12	1.26106e-13	1.09741e-13	8.65697e-17	6.08711e-16	2.68051e-12	1.25987e-15	6.69417e-14	1.65024e-17	6.87301e-14	2.72112e-15	1.40724e-17	9.99954e-16	2.76805e-15	3.4395e-16	7.22265e-14	1.72472e-17	1.69207e-13	3.19672e-15	4.54904e-12	3.9585e-17	7.18092e-18	5.06985e-17	4.74664e-18	2.0698e-14	5.10747e-15	8.68353e-17	4.03133e-13	1.26346e-13	1.69643e-18	1.01293e-13	6.5437e-15	2.80683e-17	4.77481e-16	4.04149e-16	1.09786e-15	2.11686e-17	1.2958e-14	4.14314e-16	2.36991e-17	2.72879e-17	1.33088e-15	1.21307e-17	1.19325e-17	8.90845e-16	5.1659e-17	6.85474e-16	1.26106e-13	9.00511e-20
DLK	6.60961e-23	5.67771e-25	2.28314e-22	7.0767e-23	1.70786e-20	1.02729e-25	3.63668e-23	1.01323e-21	1.68612e-19	1.52696e-23	1.59112e-25	3.03143e-21	4.43041e-23	3.07526e-21	1.28257e-21	5.20652e-27	7.3337e-25	2.24469e-23	2.11855e-19	1.06332e-20	2.89443e-24	1.72307e-24	1.01461e-22	2.10173e-29	1.27282e-22	2.33162e-20	1.39969e-17	4.33534e-23	1.27531e-18	1.97422e-27	3.79634e-22	4.3688e-20	2.67855e-27	1.67772e-23	1.174e-25	1.33099e-27	6.36076e-22	1.69451e-23	2.68948e-25	1.35805e-21	9.24659e-22	6.17694e-19	1.43504e-22	3.68513e-24	4.10278e-21	8.9031e-22	7.44978e-26	5.07695e-24	7.51068e-22
DLL	1.37525e-14	5.81262e-14	1.39959e-15	8.42955e-10	4.12497e-13	6.80024e-16	6.79947e-11	1.82677e-13	1.16548e-10	2.60988e-12	1.14586e-10	9.24365e-14	2.07596e-09	2.93166e-09	5.65562e-12	1.86503e-10	8.98097e-14	4.34191e-12	3.7248e-13	6.43521e-09	7.2361e-14	1.64235e-13	1.03923e-14	1.02955e-11	1.42133e-10	6.7374e-12	1.60989e-12	9.76158e-16	3.44259e-13	1.29463e-14	7.95379e-11	1.73482e-13	3.08673e-11	3.58029e-10	2.66506e-14	4.22286e-12	5.17306e-12	3.81998e-17	6.75678e-12	1.4185e-09	2.64654e-14	6.2121e-14	7.23787e-15	4.49515e-11	1.13799e-14	2.3491e-16	2.6383e-12	4.51421e-13	1.93588e-08
DLR	1.20678e-14	4.87303e-13	3.29794e-18	9.54092e-14	2.34613e-14	3.41645e-10	4.19106e-09	2.91824e-13	2.79876e-14	6.41804e-14	5.30106e-13	4.38714e-15	1.58354e-13	2.23148e-11	8.4693e-17	1.25533e-17	6.30391e-11	2.67314e-16	1.72881e-13	2.8559e-11	1.42207e-13	7.10048e-17	1.70564e-14	1.55041e-13	9.90934e-10	1.11565e-11	8.52163e-16	7.57732e-17	5.8926e-16	1.27208e-14	7.19082e-10	9.54897e-16	1.04287e-11	1.76267e-10	8.93385e-15	1.81546e-14	4.11744e-17	4.47349e-14	2.25451e-19	6.68664e-12	3.63664e-12	6.8788e-12	9.3318e-19	2.14467e-14	1.76961e-10	1.01567e-12	2.40413e-14	8.34343e-14	4.16566e-13
DLS	1.06014e-42	1.11438e-37	3.28957e-41	2.8924e-36	8.56098e-46	4.93715e-36	1.68902e-40	7.10884e-35	2.38389e-41	1.95116e-39	1.95927e-36	8.7019e-36	1.81031e-35	4.12951e-35	6.29101e-36	6.40631e-38	9.04163e-35	1.39207e-47	6.75794e-43	1.31463e-37	8.74439e-40	9.9973e-42	3.74398e-34	6.45409e-41	9.33319e-39	5.91896e-33	4.60035e-31	4.94871e-38	1.16803e-34	5.93989e-39	2.16341e-32	1.16666e-37	1.97237e-41	7.54521e-39	9.82782e-37	2.39259e-38	2.46705e-43	5.21244e-40	9.21614e-41	1.66133e-32	7.64663e-34	1.42526e-36	7.06517e-37	9.60552e-39	6.58269e-38	1.56543e-38	1.58016e-36	5.62804e-34	2.97299e-35
DLT	9.40814e-12	7.26564e-14	5.2486e-11	5.52996e-08	1.36776e-08	2.18396e-10	6.93316e-13	6.52279e-12	1.77763e-11	2.26134e-10	7.05122e-12	1.2402e-10	4.33132e-12	3.43444e-12	3.48666e-11	3.49808e-07	3.54262e-11	7.57038e-11	7.88936e-13	3.97534e-10	3.74567e-15	2.48121e-10	1.09246e-11	3.71729e-12	5.35465e-08	1.42032e-09	5.06351e-10	1.03477e-06	4.94468e-09	2.95781e-08	2.51938e-09	7.3576e-11	2.70381e-11	5.58427e-10	7.04291e-09	6.55533e-12	1.02046e-14	4.22066e-10	5.60944e-11	1.19476e-13	2.42757e-14	8.58484e-07	7.25251e-10	7.86161e-08	6.79428e-11	9.40347e-10	5.84308e-12	1.0167e-11	1.28998e-12
DM	7.51114e-13	2.74281e-12	1.04301e-12	1.96121e-11	2.70502e-14	1.01708e-13	1.08146e-11	9.16898e-16	2.10692e-11	7.46494e-16	1.83234e-18	9.6759e-13	1.49446e-16	1.44124e-13	1.31734e-14	2.41397e-10	1.10352e-16	2.00261e-11	2.89132e-11	3.98412e-09	9.50345e-18	2.43986e-14	1.30283e-14	1.90446e-12	3.19142e-15	9.54572e-16	6.15106e-14	9.61949e-15	1.78331e-12	1.35279e-13	3.96924e-13	7.77763e-14	3.68401e-16	1.80882e-14	7.61648e-15	4.75942e-12	2.07007e-16	6.80748e-08	3.60821e-12	5.75652e-09	2.3838e-16	2.58271e-10	2.99062e-16	1.45549e-11	8.70131e-15	8.105e-12	2.25322e-09	8.04656e-13	8.16603e-12
DNL	3.98973e-18	5.18084e-14	1.92616e-14	1.34119e-14	1.87099e-12	8.45469e-14	2.30425e-12	2.30301e-10	8.79993e-12	1.49293e-12	2.74725e-17	2.42813e-14	2.83702e-17	1.03499e-14	7.26564e-17	1.9096e-15	5.76436e-16	4.51819e-16	9.77502e-13	5.11576e-15	6.98299e-15	3.40726e-18	4.55083e-18	5.80649e-11	7.31864e-14	7.82252e-12	2.77577e-14	5.95972e-17	5.45073e-11	2.1723e-15	1.60008e-11	3.50173e-14	6.08769e-15	3.91446e-14	2.68092e-13	1.37862e-16	4.94833e-12	1.10045e-10	1.51006e-12	2.11233e-15	5.83651e-15	4.90935e-16	2.4982e-15	1.97144e-15	2.99379e-13	1.55252e-14	2.49078e-12	1.07407e-09	5.30563e-15
DRL	7.87653e-13	2.93741e-16	5.56236e-12	2.10657e-09	5.54077e-16	1.34459e-13	2.90907e-09	1.05537e-12	5.79744e-13	8.1113e-10	3.13235e-16	2.53684e-14	1.24421e-09	6.55832e-09	1.77109e-08	2.83015e-13	2.64734e-14	2.07055e-10	2.75587e-15	5.98521e-11	2.21081e-13	2.73542e-12	5.37653e-09	8.79125e-14	3.02989e-11	2.58384e-12	6.76853e-11	3.41344e-12	4.09193e-09	5.58656e-12	1.88691e-12	5.28752e-14	1.75833e-15	3.82694e-12	1.03762e-10	2.70316e-10	2.53359e-14	1.51501e-12	7.50532e-16	3.60882e-12	4.1227e-16	1.21708e-10	3.70853e-12	7.50221e-08	6.61814e-13	4.6196e-13	1.14126e-13	1.91031e-13	1.30032e-08
DSL	2.44759e-18	1.61893e-12	1.19205e-17	4.41548e-15	2.32317e-11	3.61842e-15	2.42569e-15	1.32357e-09	2.27308e-15	2.1689e-09	9.56495e-14	2.44759e-18	8.65785e-15	1.16211e-15	1.02281e-13	2.40714e-12	2.83438e-13	1.63181e-18	1.92493e-12	1.21728e-16	1.16753e-13	1.16234e-13	5.09506e-13	1.18391e-16	1.3189e-14	1.05255e-14	3.37161e-14	3.18086e-15	1.26891e-12	1.02975e-15	2.28893e-11	1.12301e-13	6.29163e-15	4.91726e-09	2.03169e-14	3.35658e-13	2.39709e-12	1.4012e-14	8.36119e-13	3.26377e-10	1.87118e-10	4.53875e-16	5.94119e-21	7.46509e-19	5.50293e-12	8.91685e-16	3.82628e-14	6.93916e-13	9.07333e-14
DV	2.05924e-09	2.35238e-08	1.13957e-13	1.81298e-19	2.14472e-16	7.76974e-14	2.80914e-16	4.99758e-18	7.69443e-15	1.38921e-12	2.5927e-10	3.42507e-15	1.42499e-12	1.00014e-10	7.0974e-15	8.50561e-17	1.3593e-14	1.20245e-16	6.08359e-14	1.23545e-15	9.4655e-15	7.78712e-15	4.45451e-20	8.89351e-10	5.79491e-18	1.14622e-15	1.02693e-16	3.87913e-09	4.25943e-15	4.36635e-21	2.04562e-19	4.61137e-11	3.54568e-16	8.08367e-22	2.10531e-10	1.08717e-14	1.63484e-18	4.20615e-13	1.30592e-13	2.41447e-14	3.34631e-13	8.33758e-13	2.45248e-15	8.62092e-15	6.58251e-14	4.71097e-15	1.92597e-17	9.00519e-18	1.15014e-13
DVF	1.97207e-08	2.49393e-10	8.81533e-08	5.01467e-15	1.56581e-09	2.68361e-11	1.28577e-12	4.73924e-11	3.71849e-12	2.03112e-10	1.37305e-11	1.68209e-12	4.68551e-06	7.07133e-10	3.00697e-14	1.45515e-10	2.35562e-07	9.69799e-13	7.28739e-10	5.16069e-11	8.88027e-13	3.77984e-12	5.62827e-11	5.68314e-09	1.18894e-12	1.76968e-12	6.99584e-12	1.15699e-10	9.27365e-07	1.17598e-09	1.055e-12	1.77158e-10	5.54484e-13	5.62941e-13	3.18523e-11	7.186e-12	4.63881e-14	2.09563e-09	1.2355e-11	2.6293e-12	3.91668e-15	8.62147e-11	1.47038e-11	3.14686e-10	6.09523e-09	5.65074e-13	9.11651e-13	9.02058e-11	1.10631e-09
DVL	1.84378e-10	1.55719e-14	6.16941e-09	9.00099e-13	3.2674e-11	7.23569e-11	8.96668e-12	1.59166e-15	1.50518e-14	2.86582e-15	4.89531e-14	7.68467e-13	5.02619e-09	1.86701e-12	1.82879e-13	4.04739e-09	9.74127e-12	2.18987e-11	8.41441e-16	9.38346e-11	6.53429e-09	1.03488e-09	3.04623e-10	4.81267e-09	1.36527e-11	8.10055e-17	1.23504e-08	6.88768e-10	1.77599e-06	1.65084e-19	4.23584e-16	1.82923e-10	5.85654e-13	1.06156e-10	6.5284e-10	8.16546e-12	9.37054e-16	1.26841e-14	7.91275e-12	1.80591e-11	1.67725e-12	3.52643e-11	1.99672e-10	3.38373e-14	5.38509e-11	3.25166e-09	5.6397e-11	5.04354e-13	2.59318e-12
DVR	1.52883e-09	3.16519e-08	1.95127e-11	2.37609e-13	2.69456e-11	1.83842e-15	2.38915e-12	4.43825e-14	1.65298e-13	2.58425e-12	1.26298e-10	3.11111e-12	1.87607e-10	1.5335e-12	2.03785e-12	1.03063e-11	1.29448e-13	8.44764e-12	6.3764e-15	1.74796e-15	4.68476e-11	2.48977e-14	2.29415e-10	1.03405e-11	6.97654e-12	3.02899e-16	1.08781e-10	1.83855e-12	1.71353e-12	2.61157e-10	2.3887e-10	1.40903e-14	2.3082e-10	2.70097e-13	2.08149e-14	1.04095e-15	1.65252e-14	1.47181e-09	6.8367e-13	8.65915e-14	2.07238e-11	2.32234e-10	2.40552e-12	1.60925e-14	2.93637e-12	4.40846e-11	9.59789e-13	9.52132e-13	3.69791e-15
DVW	2.99974e-30	2.92282e-25	2.50621e-27	1.2289e-28	1.77037e-26	5.34091e-27	7.26749e-25	4.62089e-27	1.28372e-28	2.92127e-27	3.77005e-24	1.99935e-29	2.01734e-27	3.44949e-25	7.45083e-28	5.94909e-26	1.76164e-24	1.26633e-28	4.74404e-27	3.99533e-28	4.19422e-25	7.67365e-28	1.37169e-23	8.34261e-29	7.89136e-24	1.25601e-28	1.41634e-26	7.07451e-29	4.54853e-27	2.44327e-24	2.36456e-27	1.71753e-20	2.01048e-29	2.01048e-29	1.29074e-28	5.05062e-23	1.30489e-28	7.69425e-28	9.58705e-30	1.15122e-25	1.04519e-25	3.2641e-28	6.01216e-28	6.98195e-25	6.69326e-28	4.60896e-25	3.54598e-25	3.46684e-25	2.94408e-24
DVY	8.00238e-10	8.6799e-07	3.2847e-08	5.31433e-11	1.04353e-10	1.42121e-09	3.21455e-10	2.5773e-10	1.29462e-11	1.56175e-10	3.52909e-08	9.15841e-10	2.59506e-08	1.03525e-12	1.07141e-12	2.92663e-11	7.35186e-10	1.26514e-08	1.41483e-11	2.27469e-10	1.74693e-12	7.58787e-09	7.29977e-09	2.2326e-10	7.89414e-09	1.81345e-09	6.20187e-10	8.9144e-09	7.3996e-08	1.22811e-08	1.34621e-09	2.97471e-08	3.8281e-12	4.0436e-07	3.04071e-10	6.28592e-08	7.93059e-10	9.34218e-08	4.72691e-11	2.06496e-10	5.19139e-11	1.07054e-08	1.68132e-10	1.56418e-08	5.91559e-12	1.58649e-09	3.78063e-11	3.68631e-09	6.81236e-09
DW	3.4728e-12	3.67763e-10	4.6426e-12	7.41165e-11	2.28239e-19	6.27416e-17	3.41693e-13	1.08007e-14	2.96855e-12	1.72786e-13	8.32785e-11	2.46966e-13	8.9517e-12	5.22196e-15	1.75058e-07	5.63316e-11	7.42931e-10	9.02433e-09	5.14381e-12	1.52735e-12	9.69215e-11	1.06362e-15	6.31908e-14	4.82372e-13	6.93808e-14	8.5431e-10	3.66143e-12	2.04365e-11	2.07844e-09	7.71396e-09	1.07923e-16	4.18926e-14	1.07941e-10	4.30961e-13	5.71261e-15	9.03982e-12	9.12639e-13	5.80715e-10	2.08582e-10	3.99308e-12	4.70218e-13	2.30909e-14	1.88481e-13	1.80105e-13	3.16206e-14	2.42223e-13	1.11299e-15	5.87825e-15	1.5845e-13
EC	4.66214e-13	8.97945e-15	7.22892e-17	6.28268e-20	5.94549e-12	1.31092e-15	3.574e-17	2.05314e-17	1.81139e-16	7.2318e-19	8.39187e-17	6.13978e-19	1.1423e-14	8.89322e-15	6.63216e-14	3.49101e-16	3.63901e-14	1.18611e-14	8.60961e-20	1.69624e-13	1.22563e-13	1.18242e-20	1.74159e-23	9.11221e-19	3.17418e-17	7.15735e-19	1.17541e-17	5.81607e-18	2.49676e-20	2.32623e-18	4.69066e-13	8.48075e-16	4.74913e-18	2.07443e-18	1.81383e-16	1.08113e-15	3.29773e-16	5.09574e-15	2.51131e-11	3.09602e-14	2.08166e-16	1.04191e-16	3.0727e-15	6.20129e-13	4.68532e-12	1.31335e-14	4.43638e-15	4.19068e-17	1.44885e-11
ECL	9.5599e-11	1.11122e-13	5.89812e-16	9.86404e-17	4.57353e-16	8.80436e-13	7.37332e-15	1.31041e-15	8.876e-12	5.02061e-12	2.80591e-11	5.42672e-16	8.30975e-17	8.62311e-13	4.27468e-13	1.35061e-14	6.89798e-14	8.14131e-13	4.90785e-14	1.99191e-13	6.5147e-13	7.06705e-14	2.75535e-16	8.41749e-15	4.52451e-14	4.91277e-15	4.83493e-16	1.53147e-09	1.49987e-15	4.60811e-14	1.82064e-11	2.84312e-16	1.08135e-15	1.92602e-13	1.44518e-13	2.07214e-13	5.47669e-13	4.06076e-11	3.54952e-13	2.47753e-10	7.53031e-17	4.50552e-10	1.94525e-13	3.98697e-15	8.94337e-12	1.09373e-12	2.94078e-14	6.0264e-09	1.1891e-11
ECP	1.83163e-08	7.18206e-09	5.15303e-10	1.8908e-09	2.06337e-09	1.8681e-08	1.70597e-08	1.21384e-06	1.62775e-12	7.89739e-12	2.11672e-09	6.92435e-08	1.5227e-10	3.5445e-11	4.40796e-07	5.87337e-10	4.58e-10	7.66397e-12	1.12204e-10	1.84696e-09	9.60492e-07	1.99428e-09	2.39484e-06	1.9818e-08	2.37395e-08	6.95116e-09	2.1481e-08	8.0167e-12	6.02309e-09	7.89739e-12	1.48114e-10	7.06569e-09	2.11672e-09	1.48114e-10	1.11488e-06	4.5561e-07	2.09396e-08	1.52974e-10	1.65739e-07	1.89889e-09	5.53671e-09	5.89944e-10	5.53229e-10	3.78836e-10	1.89032e-08	2.33706e-08	2.16503e-08	6.97962e-09	1.5157e-10
EDC	7.46332e-14	4.55468e-15	2.55984e-11	7.2184e-14	2.53023e-11	2.09956e-13	2.24821e-10	3.27789e-12	1.10956e-12	3.73506e-12	2.59401e-09	7.04384e-14	4.6963e-11	9.84713e-10	5.815e-15	9.23483e-12	3.18133e-13	8.56156e-12	8.7691e-13	8.8061e-13	4.98765e-10	3.15468e-11	1.9842e-13	5.51167e-10	4.36571e-15	2.71832e-11	2.78275e-13	8.14182e-10	2.19396e-09	6.86226e-11	2.38116e-13	1.13306e-12	1.19648e-12	1.90619e-12	4.17745e-12	4.58625e-13	4.7324e-11	1.24609e-10	4.48536e-11	2.20859e-11	3.3072e-13	8.7691e-13	9.05279e-12	4.1017e-12	8.99351e-14	3.92166e-11	2.23116e-13	3.78102e-11	2.69978e-13
EDI	1.3605e-16	3.40171e-16	2.09869e-15	6.89949e-19	1.29933e-11	1.41395e-12	3.57319e-12	3.34593e-13	2.54863e-12	2.00618e-11	7.83738e-11	8.50448e-14	2.46547e-16	2.62423e-10	4.71494e-13	1.73246e-12	5.79086e-13	8.2034e-17	1.08059e-14	8.44824e-16	5.03051e-15	2.03058e-14	1.48748e-12	1.68251e-18	4.91796e-11	1.33894e-16	1.40449e-13	7.31663e-15	1.07925e-12	6.4441e-15	1.67351e-13	5.04026e-16	6.49283e-14	1.55812e-15	2.04364e-13	1.12879e-13	9.51631e-14	3.04286e-13	2.46678e-12	4.22903e-18	4.4161e-10	1.21873e-13	7.49979e-16	8.6538e-19	6.36629e-14	6.7421e-14	2.88516e-16	2.62089e-13	1.20174e-12
EDL	3.60952e-14	5.67245e-20	2.45885e-19	5.70259e-17	5.41747e-16	2.49224e-15	2.18118e-14	2.71295e-16	4.73219e-14	5.55134e-13	4.64345e-16	1.25574e-17	1.77924e-21	1.30948e-20	3.6582e-14	1.09046e-15	8.68652e-16	4.89676e-21	1.03589e-15	2.92584e-11	2.70191e-13	1.1704e-17	8.72845e-16	1.67123e-16	2.41466e-13	2.12843e-12	2.90532e-19	2.69023e-14	5.50041e-14	1.38094e-17	6.91312e-13	3.80962e-19	2.02401e-13	6.50841e-17	1.13813e-19	1.3122e-16	1.32584e-17	1.00776e-14	1.13862e-18	1.52673e-14	1.47563e-15	2.53687e-12	1.09051e-17	4.04286e-16	1.31311e-15	7.29748e-17	2.82942e-12	9.21623e-15	2.96644e-15
EDV	3.73957e-11	5.00762e-09	7.44437e-09	5.12561e-14	2.07769e-16	1.73429e-13	4.0067e-17	8.09337e-15	2.31831e-11	1.89288e-12	2.53237e-13	2.22949e-19	1.90398e-12	2.475e-13	2.52225e-16	4.47146e-14	1.57073e-15	5.75308e-18	9.08395e-15	1.31428e-13	1.77725e-16	1.67152e-18	1.7436e-16	1.04408e-14	6.16983e-12	1.11126e-16	7.94125e-14	9.92831e-13	7.59532e-15	6.38901e-15	4.4643e-19	2.3595e-14	5.71908e-21	4.41539e-14	8.61837e-14	9.1135e-15	1.71654e-16	6.28791e-16	3.4463e-16	3.20921e-13	5.89417e-16	7.134e-12	1.54623e-15	3.58054e-12	3.69401e-13	1.57888e-13	1.90508e-16	7.82563e-22	1.56189e-15
EEI	2.41732e-16	6.50644e-13	3.0447e-19	2.00183e-15	4.00056e-16	1.51983e-15	2.21472e-11	9.52421e-14	1.31795e-10	1.88917e-11	3.927e-15	3.15427e-17	3.84481e-15	5.26281e-19	6.39581e-16	1.00782e-14	2.27127e-18	6.24708e-19	1.91469e-14	1.12675e-13	1.11463e-14	3.86126e-14	9.62787e-17	9.80744e-18	4.47081e-12	2.20488e-16	3.72248e-13	3.90356e-14	7.2275e-16	7.96238e-15	1.16035e-13	3.76752e-17	5.22427e-09	4.97251e-13	2.17005e-18	7.41811e-15	5.33275e-13	1.52901e-11	4.07427e-15	2.79837e-09	5.66682e-11	9.18341e-13	4.19238e-16	2.8053e-18	3.80754e-14	2.13916e-16	4.07369e-14	1.29897e-12	1.9374e-12
EEL	8.89497e-24	2.38362e-18	5.83913e-21	3.69122e-25	2.48396e-20	3.42098e-17	2.30009e-21	2.32395e-17	9.07958e-22	1.45303e-21	1.09949e-23	3.79135e-23	4.03296e-30	1.07991e-20	2.54657e-28	1.70579e-22	1.31403e-18	3.73073e-23	3.15176e-23	2.394e-21	1.91668e-23	8.91438e-21	1.72278e-19	8.72571e-23	6.81562e-24	2.78238e-21	6.93868e-23	1.2408e-20	8.57581e-18	1.05423e-22	1.3886e-19	3.23092e-24	1.05132e-20	2.83475e-23	8.89964e-23	2.44566e-18	1.1774e-22	1.2213e-26	9.20863e-28	3.85559e-20	5.07249e-20	4.78567e-25	4.53209e-23	1.10811e-25	1.95032e-22	3.55305e-27	4.22763e-23	8.27801e-28	1.13892e-25
EEW	7.2473e-13	2.14554e-12	1.48832e-13	5.2306e-14	1.81859e-16	7.59787e-13	2.17265e-12	2.9049e-11	5.79708e-11	2.56791e-12	8.55208e-15	8.90471e-11	5.20386e-12	1.45366e-14	6.86852e-14	3.69775e-09	6.84032e-12	1.60854e-11	3.00419e-13	2.08589e-11	8.53046e-13	4.18777e-15	2.63848e-12	3.21512e-15	8.76986e-11	1.63775e-09	2.78221e-15	6.36992e-13	2.6622e-13	2.76881e-15	1.98125e-11	7.45013e-12	3.67868e-15	2.64324e-11	1.49495e-13	8.20775e-13	5.49899e-14	6.7025e-12	2.10246e-11	6.15278e-12	2.57534e-15	1.01402e-09	2.16955e-10	8.65673e-12	4.50037e-14	3.87062e-14	6.8389e-11	7.16986e-13	7.79049e-12
EF	1.24302e-10	9.49574e-10	3.22284e-10	8.62431e-16	2.42916e-10	1.0589e-11	1.61767e-13	1.3973e-14	6.41437e-16	2.71178e-11	1.36606e-19	9.62307e-17	3.17707e-17	1.00009e-13	4.24681e-14	1.51183e-16	7.53328e-14	3.2242e-11	8.12838e-14	2.02066e-08	2.04515e-15	7.13043e-13	3.47495e-09	5.20317e-18	4.73391e-14	3.23602e-21	1.61124e-08	2.73256e-07	9.75471e-11	1.95607e-10	2.30508e-10	4.61943e-13	1.55024e-13	4.57846e-13	3.52102e-15	8.88054e-12	1.32707e-13	3.6264e-15	3.53574e-13	2.16602e-10	1.55753e-11	1.1595e-18	2.4143e-16	1.0515e-17	9.13776e-11	1.33644e-12	4.27401e-17	1.57896e-13	7.12727e-15
EFK	5.06765e-12	2.80603e-13	1.72523e-15	2.19021e-16	4.56911e-13	4.64467e-12	2.6897e-12	5.12555e-13	1.85158e-15	1.27046e-14	5.57462e-16	1.46566e-15	5.62003e-14	7.94543e-12	5.69795e-16	2.35693e-14	1.83865e-14	4.88645e-13	4.28193e-13	1.84614e-12	2.62496e-17	3.54735e-11	1.09218e-11	1.19992e-12	3.02052e-15	1.46876e-14	2.0483e-12	2.71917e-13	8.64388e-17	4.50333e-12	7.84235e-11	8.84273e-11	1.31031e-14	1.31513e-12	4.71287e-15	5.32305e-15	7.55223e-14	1.26124e-11	5.24547e-15	1.20916e-14	3.6654e-16	1.21121e-12	3.01414e-15	8.27774e-14	4.38006e-16	2.13884e-13	1.09463e-12	9.89656e-10	1.01709e-11
EFL	4.41876e-22	3.53474e-16	2.16483e-15	1.57995e-22	2.5867e-18	3.29608e-15	6.4788e-17	7.77329e-20	4.44548e-19	8.44677e-18	1.13132e-20	2.31553e-17	1.23704e-22	3.94831e-14	1.72832e-16	2.86953e-19	7.53291e-16	1.16085e-14	6.04345e-15	3.97698e-13	9.02304e-16	3.69407e-18	1.51734e-13	5.84218e-21	8.76663e-17	6.19311e-20	5.56726e-14	7.64307e-13	6.03527e-14	1.84612e-18	8.16874e-19	2.64115e-19	1.52198e-20	5.36145e-16	3.22289e-18	4.48355e-16	1.36825e-22	2.54828e-18	6.0123e-16	1.09817e-12	3.68806e-12	4.96742e-19	6.73757e-22	8.27567e-17	8.75239e-20	2.81717e-16	1.07053e-14	7.09858e-23	5.0854e-20
EFP	1.91185e-11	5.75473e-14	7.82022e-11	4.00511e-12	3.49562e-10	8.1029e-13	5.93256e-11	2.83807e-12	7.28953e-10	3.25665e-08	9.32158e-11	5.88291e-10	2.00222e-15	5.08946e-09	3.97156e-08	8.17923e-12	2.67267e-08	4.07958e-14	1.28232e-10	2.18435e-09	3.68689e-12	2.06619e-12	8.85484e-07	7.05201e-11	9.61716e-12	3.85226e-09	3.66668e-10	2.10203e-10	5.55658e-11	8.90567e-12	2.10965e-09	4.64456e-09	3.96363e-08	8.45773e-13	2.21494e-09	1.66055e-11	1.46047e-14	3.88196e-10	6.12128e-10	1.07305e-10	5.80725e-14	6.67529e-12	7.4835e-11	1.26306e-10	6.87452e-08	1.00152e-09	1.86616e-13	1.47405e-08	7.60303e-12
EGF	7.13773e-15	1.73708e-14	4.15005e-18	4.26339e-18	4.75578e-17	7.65921e-19	4.8375e-18	3.08208e-16	4.05454e-15	1.87801e-18	4.43061e-19	3.84208e-16	6.51422e-15	8.01832e-18	1.83319e-14	3.97015e-14	1.8331e-17	1.04724e-18	5.40899e-18	5.8302e-14	5.26345e-14	1.08335e-20	9.50251e-15	2.53556e-15	3.46742e-17	6.41383e-15	2.07278e-18	7.88967e-14	3.71923e-17	1.4136e-15	1.21356e-19	3.71908e-17	5.24497e-14	9.47011e-16	2.59157e-17	5.72451e-21	9.86489e-17	5.9803e-17	5.17128e-19	1.96246e-14	9.68328e-19	9.71412e-20	2.38609e-18	5.70293e-20	1.8193e-14	1.42794e-17	2.56564e-17	6.47448e-21	8.76806e-18
EGL	8.22087e-14	1.46894e-10	1.12149e-15	2.37206e-11	2.95553e-10	1.48857e-09	2.05259e-11	1.33509e-08	2.45345e-10	7.35946e-16	1.94417e-10	1.99179e-12	1.4535e-15	1.22039e-11	3.08597e-16	2.7226e-13	2.08342e-14	7.1379e-14	5.42854e-13	2.57694e-16	3.18798e-13	1.47729e-13	1.51321e-12	1.00224e-12	2.20602e-11	9.39661e-10	2.74088e-14	9.2911e-12	5.80127e-15	1.48897e-13	3.70487e-14	1.39052e-11	7.66879e-12	2.35456e-15	1.5139e-15	1.89854e-12	1.29537e-11	1.32089e-12	6.54091e-13	2.93524e-13	1.82264e-14	3.35525e-12	3.31465e-13	2.22948e-15	1.22181e-06	2.09775e-10	1.74902e-11	2.58492e-14	1.0797e-12
EHL	6.69626e-13	8.05818e-10	5.60853e-14	4.25385e-13	2.08192e-10	1.67714e-13	9.74087e-12	2.45655e-08	7.3538e-13	3.75558e-14	1.66468e-11	6.58845e-13	2.12151e-10	1.53828e-10	7.27673e-11	5.16497e-10	5.67539e-16	4.38181e-09	4.13797e-15	4.69677e-11	2.16907e-13	8.23574e-13	1.59634e-11	5.69456e-14	5.42184e-11	5.43067e-11	9.03309e-15	5.62771e-12	6.16295e-13	3.84269e-15	2.51288e-09	3.1514e-13	1.10674e-12	6.42418e-13	3.77126e-11	1.39282e-13	5.94877e-11	2.9509e-12	1.37988e-14	6.15089e-08	8.37116e-14	8.26148e-10	7.74613e-15	4.19024e-09	4.94077e-12	1.34788e-14	2.64074e-15	4.64303e-18	2.25103e-14
EI	8.31475e-25	3.05735e-28	1.15528e-30	4.24588e-25	2.17462e-23	3.52083e-28	2.50078e-24	9.18366e-26	8.23234e-26	1.17499e-25	4.76315e-23	3.16279e-28	3.21198e-22	4.19773e-33	1.0314e-32	3.23183e-30	3.92089e-29	1.00755e-29	7.01421e-32	1.12112e-28	3.57511e-24	4.04671e-21	1.66922e-27	6.97668e-29	9.63528e-28	2.61637e-25	4.49233e-25	2.89867e-23	4.20956e-32	6.73306e-28	4.11326e-27	7.99506e-28	1.23371e-19	3.82825e-26	8.24362e-25	3.69871e-24	1.20366e-21	9.89504e-26	1.30381e-24	8.57367e-23	5.06354e-27	3.75496e-25	1.89827e-24	3.54404e-25	2.98047e-28	9.85877e-32	3.50986e-21	2.97642e-28	2.0912e-28
EIC	2.8604e-10	5.48039e-12	1.58584e-09	4.03845e-10	3.57027e-11	2.25738e-11	2.31588e-11	7.80749e-09	1.09637e-10	4.33563e-10	2.61369e-08	4.31858e-10	1.72713e-10	1.23689e-07	6.07605e-10	1.66594e-06	2.17395e-09	4.69654e-09	7.72688e-12	2.96361e-11	7.69849e-11	1.03213e-08	1.93302e-10	3.03913e-12	8.72348e-10	8.28129e-10	5.8084e-09	6.17694e-09	5.48089e-10	5.48112e-11	6.14509e-07	5.73752e-11	8.41862e-09	4.79684e-08	7.77043e-10	5.52689e-11	1.35316e-09	2.36061e-12	1.65847e-13	1.56806e-08	3.23548e-10	2.23324e-10	8.79093e-10	6.88352e-09	6.41582e-09	7.89208e-09	1.91755e-10	2.26097e-09	1.78886e-09
EIE	3.73832e-16	7.49114e-15	5.9119e-16	5.15397e-18	3.11829e-15	5.37464e-13	1.65299e-16	7.62767e-12	3.81194e-15	3.89849e-16	3.96655e-12	2.42819e-16	6.06943e-15	8.25546e-22	1.32007e-17	1.49699e-16	1.1775e-14	4.78027e-21	4.15124e-15	1.22271e-12	3.66806e-17	1.41618e-15	1.03373e-15	2.80554e-13	3.28732e-17	5.03368e-22	6.78017e-17	1.17182e-13	1.60585e-14	2.76469e-19	4.44185e-16	8.02998e-15	1.5128e-12	1.06445e-16	3.49179e-16	1.77409e-15	4.38994e-16	3.45598e-20	5.40872e-19	1.08188e-13	8.11232e-17	5.00491e-12	1.21784e-17	1.48609e-13	1.73648e-17	9.85125e-19	5.0219e-18	1.40626e-14	9.58486e-18
EIG	3.21439e-16	1.26452e-17	7.62602e-18	2.52658e-17	2.5841e-16	1.49284e-15	5.26554e-17	2.74085e-18	5.50674e-20	1.38017e-17	4.82624e-17	1.16005e-18	1.73532e-18	1.24498e-17	9.57369e-21	2.2727e-18	5.24035e-18	1.85469e-19	3.79982e-18	3.70471e-20	1.44079e-19	1.21494e-15	2.65598e-19	3.76608e-21	2.96206e-19	1.22247e-13	1.74215e-17	6.97334e-14	3.74576e-13	5.74541e-21	1.39064e-16	3.7368e-15	5.4532e-20	2.0481e-16	3.41287e-19	1.91291e-16	6.29417e-14	3.97588e-15	1.57199e-17	1.27981e-15	9.26401e-16	9.2886e-20	2.57183e-12	3.25923e-12	1.01457e-17	1.20837e-22	1.04446e-18	4.17726e-22	3.77357e-12
EII	1.02137e-09	1.88081e-10	3.02489e-11	7.94359e-11	4.71435e-09	3.76766e-10	2.65653e-12	5.72802e-08	6.58055e-08	6.17873e-10	5.11167e-11	1.3059e-08	1.09423e-10	8.82478e-12	1.23718e-11	2.3781e-13	1.20321e-09	7.19325e-09	2.30598e-09	5.91705e-11	3.68549e-10	4.92489e-14	4.46028e-10	5.30824e-09	4.66112e-10	3.42283e-08	2.06807e-07	6.96096e-12	2.28875e-09	9.84362e-10	5.87328e-12	1.5221e-08	1.52451e-10	4.621e-07	4.10946e-10	8.52448e-09	9.24223e-09	6.55773e-11	1.73807e-12	1.01055e-07	2.73343e-13	1.343e-10	4.28372e-13	5.53807e-09	3.15636e-11	5.59238e-10	1.64926e-07	6.93782e-09	3.31666e-14
EIK	8.95797e-12	3.16035e-11	1.21861e-11	2.11767e-12	2.57557e-12	4.61209e-13	2.07221e-14	1.11905e-11	2.06701e-14	1.46358e-13	9.0449e-11	5.24509e-17	2.27937e-12	6.96161e-12	2.35127e-12	4.92576e-13	1.13211e-14	9.39362e-15	3.84256e-14	2.97108e-12	2.50756e-13	1.64496e-12	1.69703e-09	5.36024e-12	3.28218e-15	1.16579e-11	3.50784e-08	2.02911e-11	1.59792e-14	1.88599e-15	1.09461e-09	4.76428e-11	1.64848e-11	1.05918e-12	1.35764e-11	1.23786e-11	5.06812e-11	1.06678e-10	4.75489e-11	1.11391e-08	7.73089e-12	2.678e-12	9.34781e-11	2.38268e-13	7.08152e-15	1.02987e-14	3.00451e-10	1.45599e-13	2.27961e-14
EIL	1.29652e-17	1.36884e-17	2.1295e-25	1.47739e-20	5.46959e-17	3.10357e-20	4.1399e-21	3.16294e-20	7.43676e-14	1.03762e-20	2.13391e-18	1.50981e-21	1.07478e-18	1.30086e-18	2.61753e-17	7.21167e-24	4.72568e-23	2.63415e-22	8.15312e-20	3.59113e-16	4.94614e-20	3.73986e-18	7.9794e-17	4.18425e-22	8.62213e-15	1.46947e-18	1.23691e-14	9.04648e-15	2.12622e-24	1.03107e-12	2.05259e-16	2.93239e-22	3.73162e-14	1.14919e-18	1.25654e-14	2.2032e-22	3.68986e-20	3.48562e-23	5.18696e-20	7.5284e-17	1.70562e-17	1.29926e-11	1.88305e-17	1.80008e-20	9.06993e-15	1.59127e-21	1.87821e-16	4.22138e-19	1.26775e-21
EIP	4.57412e-18	1.52058e-19	4.95376e-20	1.75008e-23	1.29883e-20	2.04509e-17	8.12191e-17	1.87466e-20	8.31112e-22	2.15611e-20	3.77105e-21	2.82012e-22	1.48622e-19	2.14955e-15	1.14488e-20	1.87646e-16	3.00705e-18	1.44576e-21	7.05185e-20	6.47885e-22	5.17189e-18	7.44154e-18	1.68129e-21	1.4524e-19	5.17155e-24	1.34636e-18	5.83513e-18	5.57278e-16	1.49474e-21	1.00747e-19	6.69852e-15	1.08692e-17	1.91086e-17	3.51215e-16	2.26282e-18	9.94334e-14	1.26164e-20	1.33331e-19	1.30694e-13	3.26814e-17	1.08444e-18	1.05619e-18	6.3087e-20	2.4715e-18	5.33828e-18	6.99722e-18	3.22676e-21	2.88018e-17	4.08548e-24
EIR	1.13445e-09	9.64352e-10	3.52054e-10	9.80129e-08	7.39149e-08	4.29414e-11	7.21325e-10	3.85345e-11	3.24987e-09	3.87462e-07	1.85643e-08	4.77493e-10	3.96171e-08	9.09153e-12	2.38341e-08	3.35547e-08	1.99074e-10	8.45152e-10	7.29065e-07	3.84034e-07	3.96587e-07	1.28312e-08	3.62144e-08	6.39237e-10	1.08014e-09	3.94192e-09	4.04737e-11	1.23296e-09	1.94978e-10	7.53653e-10	1.45118e-09	2.89824e-09	1.9402e-09	2.60353e-12	3.00251e-08	3.16111e-08	1.49906e-10	8.59396e-14	2.79297e-08	3.85346e-11	2.28437e-09	2.6174e-07	1.1375e-10	4.31449e-10	6.91432e-10	7.17942e-10	4.93236e-06	3.12687e-12	4.09241e-08
EIV	4.06019e-15	1.21632e-19	3.39075e-13	2.05735e-14	8.45376e-12	3.4065e-16	1.10037e-14	7.89016e-13	1.29048e-13	8.54663e-17	3.75301e-14	2.05734e-14	4.17304e-16	2.56561e-15	3.68522e-13	3.49879e-17	2.21863e-14	8.14635e-12	8.55366e-14	1.50302e-16	1.28816e-14	2.26369e-14	2.57431e-12	2.91003e-19	6.94219e-13	1.71963e-16	3.03406e-17	8.53884e-14	4.66151e-14	7.84579e-15	9.12211e-13	6.37699e-16	6.46173e-13	3.48514e-12	1.29974e-16	2.45946e-13	7.08548e-13	3.53704e-12	1.12433e-16	9.7217e-15	6.40938e-13	1.41918e-12	3.63439e-16	1.8519e-15	2.58628e-11	7.71319e-15	6.06235e-15	3.14717e-13	9.37115e-14
EKC	8.37884e-08	6.11943e-10	1.53082e-11	8.07879e-10	1.95941e-08	4.73172e-13	1.03513e-06	2.04772e-10	1.79102e-11	7.69252e-10	7.166e-12	2.87142e-11	8.13987e-10	6.16668e-12	1.39737e-09	2.24872e-08	2.27127e-10	2.08199e-09	5.37677e-13	8.24907e-11	4.26094e-09	2.82428e-11	1.60305e-12	1.1702e-08	8.03626e-11	1.69958e-10	2.25247e-07	1.51621e-10	1.97402e-07	1.33274e-11	6.03443e-09	5.17004e-15	2.13755e-12	1.72651e-10	2.10459e-10	2.53337e-10	1.54371e-11	5.35024e-12	2.52352e-10	1.7687e-11	3.63935e-08	1.20626e-07	5.54314e-09	1.07009e-09	1.57249e-08	2.68734e-11	6.74916e-08	1.35142e-13	5.66218e-09
EKI	5.74808e-14	1.58734e-13	6.89773e-18	9.17708e-16	6.55088e-14	2.01864e-14	8.13935e-14	9.51517e-17	2.52419e-15	7.54333e-14	8.82492e-15	4.14124e-14	2.22823e-17	2.9615e-16	1.73923e-12	2.81861e-13	6.84193e-13	3.76638e-20	7.61932e-17	1.48786e-18	1.06803e-13	3.28731e-17	5.19332e-20	2.2872e-16	3.83593e-19	4.7314e-17	1.17549e-15	1.23935e-12	4.71447e-15	3.49349e-19	2.31367e-13	5.45805e-12	4.96526e-15	1.80576e-16	7.5395e-11	2.06915e-14	4.50049e-14	1.37309e-16	5.92924e-18	1.06608e-14	2.29225e-14	1.52764e-15	3.46742e-16	3.38901e-17	6.78436e-14	2.21335e-17	4.73897e-12	2.99993e-13	3.75451e-17
EKL	1.22779e-38	1.26368e-34	2.1294e-27	8.60573e-34	6.43574e-33	2.58709e-35	1.86463e-32	9.09563e-34	1.19801e-40	8.58622e-38	3.38147e-37	4.23634e-38	6.37243e-41	8.462e-35	3.28971e-35	2.15648e-33	1.6638e-36	2.43218e-42	1.82091e-39	6.76101e-36	4.12175e-33	3.02831e-36	9.67046e-41	1.28779e-40	9.98247e-40	6.22851e-39	1.6881e-37	1.9417e-36	3.52687e-37	3.13899e-36	5.14655e-33	2.40565e-37	5.13624e-34	1.00309e-35	2.0384e-39	8.11335e-37	2.15819e-35	3.90951e-40	4.39644e-33	1.61616e-30	5.69006e-34	2.47567e-30	4.27944e-39	5.01462e-32	1.19192e-36	3.01728e-33	6.23334e-31	1.48743e-29	5.2119e-35
EL	2.18787e-38	5.12267e-46	5.35678e-36	1.59678e-41	6.39354e-44	2.98174e-37	2.97952e-41	5.98922e-37	1.48345e-44	2.6541e-31	5.72526e-37	1.53401e-42	1.69619e-38	9.21372e-37	5.45091e-43	3.08862e-35	7.13729e-40	2.27084e-48	2.58755e-37	2.17153e-41	1.28893e-38	8.98585e-39	2.30329e-43	5.83882e-43	6.74509e-41	3.54486e-49	2.88901e-38	8.95092e-48	4.12142e-37	3.8498e-40	5.48583e-43	7.67718e-42	2.48999e-45	1.4736e-42	9.05678e-41	2.18413e-39	8.92491e-34	2.20418e-35	6.6468e-48	1.77835e-36	6.57924e-46	1.15751e-40	2.52406e-38	2.95434e-36	7.93487e-39	6.23107e-44	6.03797e-36	2.3301e-42	3.59316e-40
ELA	5.92695e-09	5.616e-14	1.80078e-12	1.6251e-14	5.02447e-11	3.0882e-14	1.06342e-08	1.04919e-12	5.44021e-15	1.75966e-11	9.91477e-12	9.01203e-10	6.66341e-14	3.52445e-10	3.68322e-14	4.13159e-12	2.82366e-11	9.36696e-14	9.05179e-12	1.33403e-12	1.00338e-13	7.00054e-18	8.73317e-18	1.52742e-14	6.05116e-18	1.11634e-17	1.97197e-13	1.34503e-10	9.27103e-10	3.39967e-17	1.52754e-16	2.45657e-12	1.45943e-15	2.22044e-16	3.6497e-10	1.06039e-13	1.3864e-13	2.34136e-11	4.57183e-12	4.84388e-13	1.74666e-12	1.47515e-10	1.27659e-12	3.10645e-11	5.84984e-09	8.1224e-13	1.85229e-14	6.99194e-14	5.44885e-12
ELD	2.00239e-12	3.28415e-13	9.01137e-15	2.67538e-13	1.43969e-11	1.45371e-09	3.7784e-11	1.95218e-07	2.4877e-10	7.37443e-09	2.87965e-10	1.08643e-11	1.05287e-11	4.02756e-09	1.22104e-15	9.53447e-09	1.42641e-11	1.3803e-16	5.60647e-10	6.35534e-10	1.06532e-10	2.94357e-09	1.44635e-13	1.7888e-12	1.56252e-13	1.06195e-08	7.05238e-12	6.42637e-13	6.05208e-13	1.61919e-12	8.92431e-11	5.31269e-14	2.01523e-11	2.61826e-08	7.20244e-13	5.85443e-10	4.38358e-09	2.36018e-08	8.47291e-12	1.45228e-08	4.53153e-14	1.66355e-10	8.31146e-11	8.36714e-10	4.42347e-08	1.18761e-10	3.86364e-13	9.36475e-07	4.42895e-13
ELE	6.13455e-18	5.55836e-21	3.32387e-17	2.0037e-19	7.31357e-31	1.1575e-16	4.17787e-19	8.76991e-19	1.05675e-19	1.32389e-17	4.71253e-21	1.97032e-23	9.17236e-19	2.48603e-21	1.59075e-18	3.06158e-15	3.59833e-21	6.4281e-21	4.25989e-17	3.50396e-18	3.28875e-15	1.38414e-14	3.15461e-18	4.74867e-19	2.22712e-18	1.16834e-22	2.32314e-19	9.3032e-21	4.00314e-16	1.2271e-24	3.51216e-14	1.60274e-20	1.21888e-20	2.09495e-13	1.05089e-19	3.73048e-19	7.44127e-17	7.97691e-19	2.94886e-28	1.39945e-15	1.3707e-17	1.07102e-17	4.44471e-22	3.08944e-19	2.85128e-15	3.59634e-18	9.8182e-15	1.28586e-19	8.10132e-18
ELG	2.28628e-11	5.19826e-13	4.31598e-08	2.36813e-11	2.16874e-11	8.3528e-10	1.76873e-12	1.25618e-07	3.4867e-14	1.84124e-08	4.74129e-11	3.33815e-13	1.93536e-12	2.44091e-10	3.07479e-12	4.05113e-06	2.62033e-08	3.29174e-14	1.31216e-07	1.21967e-09	3.35524e-10	2.12843e-11	8.07888e-14	6.53321e-14	3.98985e-11	2.87633e-13	4.11511e-10	6.00319e-09	4.04636e-09	1.12618e-11	1.80828e-12	1.47328e-13	3.18734e-13	1.04236e-14	3.97448e-12	1.73353e-09	2.26656e-10	3.7994e-11	3.31629e-11	2.5469e-12	3.01426e-07	4.27632e-10	2.40941e-11	6.92219e-09	1.59837e-14	3.78274e-12	1.07888e-08	7.12271e-14	1.12157e-12
ELI	3.6686e-18	3.49058e-18	5.4915e-19	1.42394e-18	5.70121e-19	4.77976e-15	2.44165e-21	1.14401e-20	3.69593e-20	1.59976e-15	1.08903e-14	1.22213e-21	1.00437e-19	5.13937e-16	4.14896e-17	8.79277e-15	1.61831e-17	9.90307e-19	1.78851e-20	3.80387e-19	2.17869e-18	7.2485e-19	5.34839e-19	2.43253e-17	3.11835e-16	1.79628e-15	7.57368e-18	2.144e-19	1.27889e-11	1.10614e-18	5.15936e-16	2.05699e-16	3.74599e-20	3.79629e-16	5.44144e-15	1.01007e-14	1.90732e-17	4.75439e-17	2.71224e-17	3.04152e-15	4.05374e-17	1.52527e-15	1.53665e-14	4.54055e-17	1.8998e-14	1.64792e-16	6.74667e-16	1.76166e-16	4.03224e-17
ELK	1.26912e-24	8.59909e-22	1.99454e-20	5.11771e-22	7.73344e-25	8.26399e-26	2.24608e-24	2.36099e-26	5.95289e-24	1.41643e-19	1.59291e-23	4.33286e-26	2.65409e-25	5.49791e-25	8.2541e-25	3.41776e-23	3.7107e-27	1.85961e-25	1.88178e-24	1.29399e-20	1.78276e-23	1.40885e-25	1.61822e-27	1.66719e-23	1.47208e-16	4.27225e-27	1.19431e-24	1.93783e-31	4.8823e-24	9.56777e-28	2.48107e-31	6.55446e-25	1.69344e-23	1.3894e-20	1.22992e-25	6.64683e-18	3.89557e-25	1.90551e-23	1.17372e-21	7.96529e-22	2.31261e-24	9.78179e-25	3.57946e-20	4.60148e-24	4.724e-21	6.44598e-24	1.03823e-18	4.6324e-26	3.56317e-25
ELL	1.39177e-26	8.28617e-24	1.39159e-15	1.8698e-16	5.87391e-21	9.63591e-19	8.10593e-15	1.15153e-20	2.12211e-23	5.98984e-22	1.23371e-17	4.75129e-17	4.20032e-18	1.32437e-15	9.03813e-21	7.74931e-16	3.8283e-18	1.32573e-17	2.62504e-16	3.75527e-22	5.19594e-18	3.9018e-19	8.0792e-19	1.13413e-25	9.24736e-23	6.12235e-26	5.29931e-18	1.2029e-19	6.4075e-18	1.48102e-20	1.001e-23	5.39199e-22	7.27807e-19	1.26431e-20	2.44969e-17	1.0569e-19	5.3971e-15	4.02077e-16	7.16283e-27	1.94254e-16	4.62931e-23	1.11378e-24	1.78574e-27	2.0281e-22	2.83911e-26	5.16657e-21	2.76251e-14	9.03057e-21	3.67212e-24
ELN	5.15504e-11	3.34871e-17	1.35527e-12	4.80446e-13	4.16218e-15	4.79022e-15	9.4655e-14	4.89302e-14	1.80449e-16	1.69633e-14	3.72627e-15	1.90185e-16	5.3301e-16	3.60937e-17	4.42114e-18	8.09878e-11	8.1263e-16	4.81662e-15	1.55408e-15	1.00449e-12	6.45368e-15	1.63699e-16	5.11647e-12	6.27932e-12	2.95546e-12	8.74605e-15	1.11792e-14	3.55926e-17	1.14249e-16	3.82378e-15	2.15235e-17	6.2452e-11	7.30523e-15	1.05036e-14	6.80818e-10	1.59799e-13	8.04841e-13	9.26303e-11	2.20915e-12	2.04117e-13	3.43479e-15	1.25253e-12	1.2735e-15	3.5966e-12	5.58021e-16	1.40488e-13	3.7714e-14	3.14855e-14	2.78276e-14
ELP	2.51116e-35	3.78663e-39	7.32357e-39	3.11582e-37	1.3831e-35	6.486e-48	2.55564e-45	2.9621e-36	1.43192e-41	2.42425e-39	7.31104e-42	4.81925e-40	1.43481e-36	6.47017e-33	1.03052e-38	3.27065e-36	1.00611e-38	3.37796e-40	2.92319e-39	1.4037e-34	8.88924e-42	1.07617e-41	2.87637e-42	2.17891e-36	2.0709e-40	2.40126e-39	6.41587e-39	1.51738e-39	3.53959e-46	4.52074e-37	7.75859e-35	4.41061e-45	1.41477e-40	2.46542e-39	2.44417e-38	1.46678e-39	3.98425e-48	4.79108e-33	2.35987e-34	5.04053e-34	4.73446e-39	1.86014e-34	1.05031e-38	2.54016e-35	1.00159e-36	5.1218e-42	1.97167e-41	2.33612e-38	9.04635e-37
ELQ	9.17936e-12	9.92653e-12	9.55111e-19	1.46292e-19	1.94321e-14	8.15388e-19	5.57553e-16	7.18366e-10	1.51286e-14	7.30563e-14	2.27739e-15	5.33603e-13	3.08537e-13	1.29143e-13	5.62968e-14	2.87205e-15	3.09625e-09	3.31284e-16	1.24528e-16	5.4849e-14	1.75144e-17	6.73109e-12	3.99564e-14	3.16405e-17	6.22336e-19	1.05078e-21	5.28053e-16	1.63784e-16	1.85169e-13	4.25121e-15	4.37007e-18	2.88949e-17	2.64567e-11	1.02505e-17	1.51086e-15	6.24461e-16	7.48497e-14	4.40054e-14	4.53131e-16	6.14657e-14	4.0219e-14	3.40913e-13	2.47981e-18	4.04964e-19	8.75327e-15	2.28954e-16	1.20158e-13	1.80523e-13	1.6037e-12
ELR	3.42229e-09	1.00726e-13	3.85141e-09	2.07802e-18	1.38667e-12	1.1467e-11	6.17611e-16	3.22856e-09	4.57349e-13	1.01426e-14	1.50468e-17	1.67988e-12	3.93749e-14	7.67166e-16	4.45692e-18	1.13133e-09	6.06192e-12	2.93792e-11	3.59735e-12	2.26726e-12	1.82432e-15	1.57028e-10	4.25744e-09	2.58031e-11	6.3097e-12	2.57462e-13	3.87898e-09	1.41642e-11	9.88449e-12	3.12368e-18	1.50377e-12	1.50601e-14	3.16753e-17	2.54136e-13	1.70511e-14	7.05935e-11	3.23212e-09	1.79301e-16	3.17313e-13	5.84594e-13	5.05158e-16	2.72379e-12	4.93166e-15	1.89905e-12	3.65028e-11	2.16393e-13	1.37444e-14	3.76726e-13	3.51121e-13
ELS	2.34278e-23	1.16558e-23	2.3643e-20	1.08209e-23	9.15732e-24	5.04609e-18	3.7935e-23	6.92823e-23	1.06143e-18	6.06106e-23	4.56422e-24	4.06367e-24	3.89341e-22	8.67431e-25	1.84049e-21	8.51402e-24	2.38983e-15	1.47719e-30	7.61749e-22	9.83424e-19	4.90478e-22	1.01847e-25	1.21702e-23	6.71963e-22	1.07988e-23	6.23853e-25	4.13246e-22	1.08475e-21	1.61388e-19	3.69349e-21	3.99145e-18	2.48646e-22	3.71203e-22	4.69152e-21	6.27896e-29	1.17808e-24	6.872e-23	1.47453e-23	5.54277e-27	2.84176e-18	4.36654e-18	1.2622e-19	1.05535e-19	1.03733e-19	1.28472e-24	1.48558e-24	9.11963e-25	3.83601e-23	1.32644e-21
ELT	1.38901e-12	3.70397e-12	3.7821e-13	1.6807e-13	5.92564e-14	3.00457e-12	1.6564e-12	1.60993e-12	9.47466e-15	1.14612e-15	2.97894e-15	1.70992e-13	1.82642e-14	2.63875e-12	3.23341e-16	2.99239e-14	5.74378e-13	3.9502e-10	6.54797e-14	3.38068e-16	5.08025e-13	6.67654e-19	2.68958e-15	4.2984e-13	1.31852e-13	7.7342e-15	1.11928e-15	6.96909e-16	2.35909e-13	3.7631e-14	6.69679e-14	4.37968e-14	2.59627e-16	3.08082e-14	2.24924e-18	2.50028e-13	2.26563e-14	8.05929e-14	6.95831e-12	3.78905e-11	7.67682e-17	8.74754e-12	5.82152e-16	2.03809e-10	6.73892e-14	6.66346e-13	8.71507e-13	2.51623e-14	8.13805e-15
ELV	4.34017e-32	2.27743e-30	6.31851e-22	1.11758e-29	1.36459e-27	4.80315e-29	2.83319e-27	9.65143e-28	3.83547e-29	4.52066e-25	1.40418e-28	7.87168e-27	7.27641e-31	8.52423e-30	1.8858e-27	4.53834e-25	4.94687e-29	1.08573e-28	1.8103e-25	5.59249e-26	3.95936e-33	1.10795e-23	1.23415e-29	7.47153e-34	1.53985e-23	9.5798e-29	9.60737e-31	2.04366e-28	2.48959e-29	6.56509e-29	1.86831e-31	2.43059e-25	1.04117e-32	1.63437e-28	2.52213e-26	9.66783e-24	4.69465e-27	1.49588e-17	2.50218e-31	9.99108e-26	8.97033e-29	1.45618e-23	7.00961e-29	2.07495e-34	3.99721e-26	1.46027e-27	2.65072e-33	5.5498e-27	1.80169e-21
EM	3.46742e-10	6.33448e-08	4.9483e-09	1.39121e-12	3.51692e-09	1.2625e-08	1.1315e-11	1.30319e-09	4.14403e-09	8.44582e-15	7.56673e-17	1.60639e-14	1.26309e-17	2.21103e-13	1.48316e-20	2.69708e-10	1.24351e-11	1.07596e-10	1.82616e-12	7.58202e-15	1.01972e-07	4.32986e-10	8.89379e-13	1.39609e-07	1.76434e-15	1.08197e-10	4.59965e-11	6.54366e-17	2.66637e-09	2.16112e-07	1.17524e-07	1.14387e-11	5.22548e-10	1.1276e-07	2.05981e-10	4.3993e-13	1.14445e-08	9.61966e-09	1.08911e-08	1.16035e-10	1.29784e-09	6.11955e-12	3.43221e-11	5.8931e-14	1.94964e-11	4.64539e-13	1.8587e-07	1.32877e-09	7.58438e-09
ENF	8.146e-12	4.72496e-10	1.33628e-13	1.63318e-08	2.65423e-13	1.7455e-08	8.42683e-10	6.53803e-10	2.82622e-11	2.93897e-13	2.10023e-10	1.40933e-08	3.52503e-15	2.36562e-11	1.48494e-11	1.82751e-10	6.19793e-09	6.8205e-12	1.94755e-13	1.65324e-13	1.75348e-13	2.45464e-09	2.93456e-07	1.83007e-12	3.50525e-10	9.781e-08	4.25859e-10	3.76197e-08	3.97297e-10	1.25895e-11	2.75321e-11	1.08625e-09	1.83738e-12	2.19366e-09	6.04491e-11	7.72991e-09	4.64095e-11	6.66401e-12	1.04648e-12	1.11596e-09	1.83738e-12	2.40614e-10	5.55642e-11	5.7398e-13	4.84185e-09	3.66759e-10	1.69783e-09	5.99185e-13	4.40119e-10
ENL	6.65413e-37	6.18308e-21	1.24173e-30	6.9119e-33	1.24828e-29	8.04097e-25	5.4868e-23	4.68932e-19	5.3371e-24	2.17123e-26	4.18109e-27	1.07648e-23	3.20765e-28	5.42939e-28	4.2723e-27	1.77335e-23	8.69886e-31	1.59382e-36	7.49322e-26	4.11606e-27	1.15657e-26	3.84683e-31	1.44889e-25	9.89369e-28	2.61664e-23	2.42547e-27	1.12537e-27	3.07332e-29	3.36778e-22	1.50999e-22	1.86665e-31	1.68414e-25	1.83526e-30	5.59476e-28	7.74586e-25	5.0384e-23	1.8274e-26	2.75834e-27	4.89584e-29	2.59268e-28	4.63742e-25	1.59111e-31	7.42991e-32	2.20382e-27	2.93252e-31	2.46256e-23	7.43202e-25	5.00018e-30	6.96593e-28
ENV	1.01304e-08	9.66449e-11	5.53996e-11	1.1629e-11	1.44999e-07	1.84706e-07	4.57795e-10	1.40513e-08	5.59789e-08	7.822e-12	1.22048e-10	9.14984e-09	8.63527e-10	1.06255e-10	4.7424e-08	2.22737e-09	3.64736e-08	1.54019e-08	2.3649e-08	3.23654e-10	2.79439e-09	5.4339e-09	1.00734e-09	1.48262e-08	7.051e-10	1.29438e-08	7.94409e-10	1.21661e-09	6.95833e-07	2.05112e-08	8.02996e-11	6.37876e-09	8.23807e-09	8.32678e-12	4.60952e-07	3.26748e-10	1.93406e-06	2.82719e-07	2.59083e-12	4.10086e-08	1.20506e-09	4.82335e-09	2.26184e-10	5.56445e-09	1.00869e-08	8.80374e-08	1.40109e-09	1.58669e-09	2.53494e-11
EQL	1.9236e-12	3.58818e-17	6.49054e-15	4.48546e-15	5.02968e-11	1.1898e-11	3.18625e-14	3.27077e-19	6.60138e-15	2.2748e-14	1.13971e-16	2.0542e-13	7.59512e-17	5.81594e-14	4.44768e-16	1.43292e-14	9.95745e-13	7.09934e-19	7.11387e-19	7.30673e-15	1.61005e-15	9.91503e-15	4.7248e-15	5.54881e-16	2.19338e-14	1.54464e-13	7.28874e-14	3.12245e-13	4.80227e-17	1.05086e-18	1.10611e-12	2.27743e-13	4.40932e-12	2.05812e-16	2.63169e-15	5.03923e-14	8.95079e-17	7.60919e-15	3.49427e-13	1.75195e-12	3.99298e-13	3.51765e-13	5.97584e-12	6.01873e-18	2.00424e-08	9.34901e-17	2.81607e-13	9.55466e-15	2.13578e-13
ERL	7.32751e-14	4.1544e-13	7.20654e-13	1.05176e-14	1.4371e-14	4.2817e-10	4.71328e-14	3.34403e-16	7.20495e-17	1.50785e-14	1.19615e-13	2.12791e-20	3.63798e-14	5.39204e-14	8.09004e-15	1.35507e-19	3.62477e-14	2.3704e-15	6.35623e-12	2.4174e-18	3.17334e-15	8.38771e-13	2.2164e-14	1.36796e-16	3.46741e-14	9.63253e-14	1.66818e-15	5.41391e-15	1.58854e-18	2.05427e-15	6.40907e-16	4.4383e-17	2.77016e-17	4.49704e-14	2.61105e-18	1.26709e-15	4.50587e-13	1.68613e-17	1.52292e-16	2.32115e-19	1.50592e-19	1.55768e-18	3.5469e-15	2.8306e-12	1.60709e-14	3.30189e-13	2.82258e-14	7.11258e-14	7.42262e-12
ESF	7.96107e-11	1.17454e-16	2.09065e-08	9.32288e-11	5.82385e-14	1.01486e-10	2.8176e-11	2.46157e-11	3.1176e-11	5.76057e-11	5.61886e-11	3.58803e-15	3.83991e-14	3.07806e-11	1.55277e-12	1.41243e-14	1.73569e-11	1.271e-10	4.34585e-09	1.07899e-09	6.44151e-16	4.16437e-13	1.22161e-15	9.94855e-15	2.85795e-11	5.62364e-12	2.28457e-09	1.22299e-10	1.16291e-07	1.76326e-14	1.63713e-10	3.23849e-12	1.04193e-13	1.40724e-12	1.48828e-10	1.05454e-08	1.51892e-12	1.23856e-11	3.62256e-15	1.24814e-15	1.82362e-12	5.43259e-11	7.09866e-10	2.93917e-14	1.89484e-11	1.34688e-15	2.1487e-11	1.33199e-10	5.39652e-12
ESI	2.6556e-16	4.34138e-15	1.86155e-12	2.20724e-10	1.58691e-13	4.91103e-10	9.38236e-15	4.03609e-11	1.0765e-11	5.63768e-10	1.15047e-07	2.97098e-11	1.08122e-15	6.5768e-12	2.09928e-09	7.73316e-11	1.58434e-13	3.79139e-11	1.79493e-15	1.08314e-11	2.50328e-13	5.27523e-12	6.36719e-08	1.05766e-13	1.55036e-10	9.15235e-11	1.04112e-12	1.24722e-12	9.30644e-17	2.86291e-10	3.59616e-12	4.189e-06	6.19829e-09	6.06939e-10	2.13803e-12	7.5015e-13	5.47541e-11	1.04483e-11	2.55258e-14	9.18531e-15	7.34212e-11	7.31025e-13	1.96504e-12	1.60822e-16	1.88944e-12	1.37806e-14	4.93128e-14	5.58897e-14	7.62125e-12
ESL	6.18879e-28	5.23778e-23	1.27652e-28	3.03499e-23	7.98907e-27	6.89586e-29	1.8447e-21	1.21799e-20	1.39004e-25	1.57802e-28	1.65207e-26	3.50581e-24	7.3189e-25	1.41535e-24	1.36549e-24	4.60734e-22	9.69482e-19	1.6946e-27	5.58224e-22	2.13029e-25	1.839e-21	5.04396e-33	4.83808e-25	1.1936e-26	3.95314e-26	2.87496e-24	3.96428e-30	4.67814e-25	9.05578e-27	4.04207e-25	4.80088e-25	5.25406e-23	3.77478e-25	1.37775e-22	3.83719e-29	1.99088e-26	2.13092e-25	1.0704e-25	2.19148e-22	1.61814e-24	8.63514e-27	4.03344e-30	4.25698e-26	1.15776e-22	8.11992e-27	6.59283e-25	1.30669e-21	3.32778e-27	9.84297e-22
ETL	1.19146e-15	2.88303e-11	2.92313e-17	8.70511e-15	6.45774e-15	1.71827e-12	1.60045e-13	2.2952e-10	1.86811e-16	2.54507e-18	2.53708e-15	1.1414e-15	1.34215e-17	1.16752e-11	1.76743e-20	6.93801e-13	3.34331e-14	8.609e-15	5.48269e-18	8.30722e-16	1.07876e-13	5.19078e-17	3.18157e-15	1.37573e-14	1.21411e-16	4.52149e-16	1.54024e-19	5.39008e-14	1.07101e-14	1.67777e-19	1.3879e-17	8.14023e-17	5.24278e-16	1.69352e-17	1.89245e-14	4.5111e-11	4.10616e-15	2.86716e-13	1.55175e-14	7.85178e-15	3.27178e-13	5.98428e-16	4.34342e-15	4.88798e-17	4.63957e-19	1.01498e-13	4.44899e-15	2.62607e-13	1.58585e-14
EVL	2.7082e-25	8.71645e-36	4.3968e-26	5.09528e-31	1.92036e-25	4.09093e-28	6.13767e-19	1.32543e-25	6.37396e-24	1.3587e-28	5.79699e-29	2.1818e-27	2.67131e-20	3.0163e-25	1.23472e-25	2.83778e-22	5.35855e-29	1.17317e-29	5.2391e-30	4.47934e-26	6.19821e-25	1.64704e-24	1.7319e-26	1.23261e-26	8.66867e-20	4.80703e-24	4.36315e-26	3.8033e-31	5.3039e-23	5.06963e-27	2.1721e-27	5.46978e-26	1.83593e-23	1.65013e-26	1.59448e-29	3.65332e-26	1.22072e-27	1.31499e-29	1.1015e-30	2.68694e-28	1.09067e-26	5.18728e-29	3.68596e-26	4.03305e-27	1.42757e-31	8.14105e-22	1.03178e-27	1.49495e-25	3.86068e-32
EVP	2.29621e-12	1.77013e-13	1.16616e-10	2.39294e-14	1.69643e-11	5.88328e-18	4.33934e-12	1.14866e-13	3.32043e-11	9.29486e-10	6.67232e-11	7.45439e-17	2.19247e-17	4.90764e-14	1.34614e-13	1.49324e-08	4.68682e-09	6.33676e-12	1.50415e-14	3.6287e-14	7.72529e-16	9.62888e-11	7.00286e-11	3.13057e-09	1.75511e-14	3.34693e-11	5.21119e-11	7.45998e-13	1.25446e-14	5.61975e-11	1.90865e-12	6.06631e-13	3.11088e-13	3.48382e-14	2.16306e-10	1.06514e-12	1.02426e-14	3.96257e-12	1.30481e-12	3.72241e-11	1.55703e-09	2.03586e-12	1.28653e-10	5.0044e-14	1.28737e-15	9.85621e-13	1.40252e-16	9.46633e-14	6.0598e-14
EW	1.14292e-24	1.19494e-22	1.79628e-24	5.59012e-24	3.03568e-28	2.86928e-28	9.4632e-31	5.82651e-27	2.10604e-24	4.37801e-30	4.52572e-30	3.13712e-29	1.36527e-23	3.17889e-27	8.27516e-29	1.04625e-21	5.87954e-26	5.25733e-26	3.20382e-28	5.45185e-27	4.23813e-22	6.28559e-25	6.07826e-25	2.79245e-30	1.95105e-22	8.76069e-27	3.27777e-28	9.11371e-23	5.76077e-27	3.20173e-30	5.9012e-23	3.19074e-29	1.35267e-27	5.67331e-21	9.88272e-35	1.74505e-27	3.77084e-24	1.25126e-30	3.27322e-28	2.2704e-21	1.43207e-20	4.46829e-22	2.35861e-24	2.55648e-33	2.26018e-24	3.00462e-26	4.68253e-26	6.86167e-18	1.32088e-26
EWE	5.95285e-15	2.26952e-11	6.95254e-13	3.89031e-12	2.15855e-14	2.55522e-14	4.25002e-14	4.44867e-15	2.14677e-16	8.2525e-16	3.44817e-15	4.37729e-12	8.41441e-16	1.16447e-14	5.06762e-11	2.98363e-12	8.21293e-15	7.85869e-13	3.15949e-12	5.17664e-14	2.53512e-11	1.05009e-13	5.0749e-15	1.31983e-15	1.0698e-11	4.24399e-15	8.40725e-13	3.32976e-11	8.59569e-12	5.24456e-15	1.22365e-17	1.18153e-12	1.23205e-12	2.46379e-14	4.95704e-15	5.09305e-17	4.54023e-12	1.35251e-14	6.24522e-14	3.63214e-15	1.37016e-11	1.97004e-14	2.48121e-13	5.36915e-15	6.21742e-14	2.16826e-16	2.62231e-12	2.24475e-18	7.1011e-13
EWI	4.61527e-11	1.47756e-09	4.6571e-10	2.47558e-09	6.40909e-09	1.82087e-09	1.41984e-10	5.61141e-10	2.50647e-09	1.54654e-10	1.87545e-10	4.40526e-11	2.21374e-09	1.71475e-10	9.13229e-12	1.52151e-09	1.41346e-10	1.14674e-11	4.8576e-11	3.70647e-11	1.58168e-10	4.61527e-11	4.8576e-11	4.55126e-11	7.08308e-10	2.16641e-06	3.4714e-11	4.3441e-11	6.55494e-10	2.14307e-08	1.93018e-09	2.18456e-08	5.17428e-13	5.755e-08	3.70647e-11	4.98089e-08	6.84356e-08	9.55435e-14	1.77219e-09	1.00141e-11	1.29159e-10	1.64292e-07	2.25257e-08	1.13023e-11	1.9351e-10	2.12378e-09	1.21795e-10	2.21374e-09	4.90297e-11
EWK	5.91048e-08	1.31636e-08	3.21431e-08	7.08128e-10	1.47589e-11	3.73444e-12	4.48749e-11	4.60623e-09	6.57883e-10	1.51091e-11	1.22869e-11	7.55745e-10	3.73444e-12	5.97048e-11	8.7139e-10	1.93647e-08	7.66631e-09	1.93647e-08	1.58533e-09	2.21296e-10	7.89327e-09	2.75318e-09	5.83708e-11	2.09975e-09	2.47897e-09	1.20576e-11	2.72009e-09	2.16752e-08	7.30792e-10	1.638e-09	1.49957e-10	2.20446e-09	7.20316e-09	5.785e-10	1.44292e-09	5.09485e-08	5.49891e-09	2.58113e-09	1.51091e-11	1.8614e-08	2.06817e-08	4.20075e-08	5.06342e-10	6.89042e-10	1.56687e-10	2.36156e-09	3.31734e-07	3.10348e-12	5.78367e-08
EYL	1.09345e-12	3.89636e-14	1.72333e-13	7.57218e-15	1.01731e-15	2.23108e-16	8.46513e-13	2.3711e-13	4.95422e-15	1.28973e-16	1.45963e-13	6.62858e-17	2.5376e-14	1.02456e-13	6.41628e-18	2.02176e-13	4.41318e-15	1.2483e-19	8.64956e-15	5.70368e-16	8.78987e-16	7.00704e-16	3.60847e-13	2.87552e-15	5.14452e-16	1.00695e-15	1.66917e-16	1.50714e-14	3.90459e-17	4.73585e-13	1.99836e-18	4.60339e-16	1.88134e-18	2.4898e-16	1.00903e-13	3.78269e-19	5.82031e-15	5.51223e-13	5.87471e-14	6.86559e-17	1.07669e-11	4.49818e-16	1.20947e-15	5.22501e-11	1.18379e-13	7.63799e-14	7.63026e-18	6.90682e-15	6.07277e-18
FC	2.25203e-13	3.88882e-12	5.25616e-11	8.14067e-11	6.00838e-08	1.89595e-09	1.11897e-13	5.37413e-10	1.86757e-08	1.37523e-09	7.82069e-13	2.3638e-15	1.26042e-09	1.75861e-15	4.48536e-13	1.16302e-09	6.32686e-12	2.32876e-10	1.84158e-14	4.40248e-13	1.69103e-11	1.15669e-11	5.09514e-13	2.62053e-10	4.49187e-15	1.87077e-15	7.28947e-18	2.91058e-10	9.46052e-09	4.69835e-08	5.43823e-14	1.65451e-12	2.85008e-13	1.15137e-10	7.03469e-14	4.42568e-12	6.6784e-16	1.95927e-09	2.87335e-11	2.16612e-11	4.92883e-09	8.2625e-14	6.76362e-20	6.31892e-15	9.24053e-16	8.53765e-13	2.25083e-11	2.74558e-11	1.77996e-09
FDG	5.76999e-12	1.4802e-10	3.13143e-10	5.60726e-10	2.29664e-12	1.2225e-11	1.04396e-11	1.98015e-12	6.21834e-14	5.27903e-09	5.18034e-13	1.09868e-10	6.42287e-12	2.08593e-11	7.2414e-09	2.8389e-07	3.84047e-11	4.12563e-11	1.61232e-11	3.62382e-11	9.06203e-09	8.2258e-11	5.61192e-07	1.20723e-13	6.8826e-11	6.95484e-10	3.3142e-08	6.46888e-12	1.12098e-09	4.73529e-11	2.55331e-10	9.67618e-13	5.82183e-12	5.31056e-09	1.25878e-10	1.26128e-12	3.44337e-08	4.46175e-11	2.301e-10	2.52856e-10	3.33832e-09	2.4717e-11	4.60044e-11	1.25237e-08	6.02294e-12	9.99675e-12	1.42423e-11	2.79336e-09	9.13193e-10
FDV	3.08638e-09	2.90145e-11	6.73778e-10	8.94026e-13	1.08056e-12	1.3609e-08	1.53812e-10	9.75537e-13	1.87199e-12	7.45407e-10	1.18444e-09	3.54601e-13	1.28561e-12	3.39209e-12	3.02059e-11	7.87468e-12	1.36106e-11	2.95355e-12	7.43065e-11	2.31778e-11	8.17556e-09	9.23793e-09	2.81835e-09	6.042e-08	6.09949e-10	1.68631e-10	2.6432e-12	1.81736e-09	6.3699e-08	4.07914e-15	1.60304e-09	2.26805e-10	9.97497e-15	5.70129e-13	1.52607e-12	3.08638e-09	8.58033e-14	2.53509e-11	7.28602e-11	1.35438e-11	2.68099e-10	1.72425e-08	3.75334e-14	5.70436e-12	4.74931e-11	1.77886e-10	5.38781e-11	4.80878e-11	3.07455e-14
FGK	8.32018e-11	5.0589e-10	1.12265e-12	4.47334e-13	3.02088e-11	3.57683e-11	7.21681e-11	8.64207e-13	3.84602e-12	3.64155e-11	1.29903e-09	1.84651e-11	1.34806e-08	8.77842e-09	6.68866e-10	1.44281e-10	3.50064e-11	1.44911e-11	4.72424e-10	2.2411e-08	2.47156e-10	3.6612e-11	7.22952e-11	2.00272e-09	8.55541e-10	5.86189e-08	1.28227e-09	7.2298e-12	1.20322e-13	9.13067e-07	2.47155e-10	3.528e-13	1.64755e-07	1.40111e-10	2.17831e-11	1.25345e-09	2.97855e-12	9.80064e-15	1.10344e-11	4.2345e-09	7.21635e-12	7.8975e-09	3.00416e-09	2.98521e-09	1.31419e-10	4.33715e-14	1.75522e-14	6.894e-11	2.3052e-09
FGN	3.09297e-10	5.19229e-13	6.67278e-07	5.76978e-12	4.87654e-10	1.49704e-13	4.01457e-09	2.80787e-10	3.98116e-15	4.64564e-13	1.10523e-08	2.31999e-09	2.40645e-11	1.04994e-10	5.77111e-08	5.6e-10	8.95718e-10	6.06448e-11	7.436e-15	4.6956e-14	6.17137e-08	2.19324e-12	7.62105e-11	3.11639e-11	6.09346e-11	1.2176e-14	1.77595e-11	1.08268e-09	3.45072e-11	1.18359e-11	1.60269e-10	3.05687e-09	4.93543e-12	7.06426e-10	8.34746e-10	8.61035e-12	1.85841e-12	4.49404e-14	1.51224e-10	1.70502e-10	7.44891e-11	1.15746e-09	2.6683e-10	3.31108e-11	5.9257e-10	1.94294e-08	1.59293e-09	2.60566e-11	3.04478e-15
FK	3.71622e-16	8.72791e-14	2.04922e-15	1.46318e-16	1.20639e-13	3.90652e-10	4.55913e-16	8.02734e-15	3.02425e-13	3.8623e-20	6.05726e-19	2.57892e-16	2.7237e-18	6.80162e-17	2.67053e-13	1.10071e-16	1.47626e-19	2.9837e-15	4.73945e-20	3.72698e-14	1.27293e-16	1.09016e-13	1.25932e-09	6.94192e-12	3.46507e-18	1.4226e-14	1.42889e-15	3.37844e-10	5.60182e-12	1.32769e-12	2.55059e-13	1.71594e-11	7.536e-19	1.24881e-20	2.09075e-14	3.05404e-13	7.64144e-14	8.62693e-13	2.25372e-20	1.5309e-14	3.11585e-25	1.05588e-17	8.62744e-17	5.94616e-21	1.89688e-20	3.4415e-17	3.24239e-14	1.10456e-12	3.05554e-12
FLD	2.91841e-17	1.35313e-11	2.09014e-16	3.36277e-20	3.38503e-18	6.09774e-14	9.75472e-16	1.7496e-21	3.93398e-16	5.70914e-15	2.57047e-21	9.73161e-14	3.72981e-17	8.47904e-20	6.8832e-13	1.73034e-14	1.01054e-17	1.80352e-16	2.91904e-15	2.32675e-17	2.63389e-13	9.41807e-21	4.68421e-15	1.08459e-15	7.14278e-18	8.25231e-17	2.05181e-11	2.15876e-15	6.76594e-11	2.51576e-18	7.45651e-15	2.33778e-11	2.78236e-19	1.28135e-20	7.3829e-17	6.3895e-15	7.28621e-20	1.85796e-17	3.18931e-19	1.68556e-14	3.21272e-17	6.77366e-15	8.88757e-21	4.66188e-15	4.30308e-19	5.24061e-13	4.29149e-14	2.13281e-17	3.18143e-13
FLE	2.18592e-12	4.69069e-11	2.86133e-10	1.01597e-09	1.13107e-12	1.17233e-13	1.66163e-13	5.44857e-13	1.90841e-12	1.01937e-10	4.4929e-12	1.46138e-12	7.69962e-13	3.67576e-15	5.58272e-10	5.63525e-13	1.87378e-09	6.47816e-11	1.49162e-14	1.60308e-09	1.49908e-10	5.23912e-14	9.34984e-11	1.81801e-17	1.50966e-12	3.09771e-10	4.68421e-11	1.40553e-10	5.07066e-17	3.66333e-11	9.65194e-10	2.14026e-11	1.72099e-13	5.90677e-11	4.15428e-10	5.01094e-11	4.22528e-10	1.29322e-10	1.28193e-10	2.53304e-09	1.04959e-12	5.59175e-15	3.38542e-11	1.84308e-16	3.45831e-12	8.33019e-13	1.53851e-10	8.68177e-16	2.22593e-14
FLK	3.96871e-09	2.24645e-11	3.86188e-12	1.16289e-13	9.46827e-14	1.22489e-09	2.59916e-11	6.92518e-10	1.02777e-08	2.12816e-10	9.23996e-11	3.57833e-10	1.54453e-11	2.39177e-09	1.96131e-09	1.10787e-08	1.58611e-13	2.49627e-10	8.05048e-12	8.51754e-09	4.35663e-11	1.33434e-09	1.87516e-09	5.57631e-11	2.54896e-10	1.13192e-08	1.50642e-10	3.23631e-10	5.603e-12	2.60463e-12	7.11564e-07	8.31367e-09	1.88915e-14	7.66789e-09	5.93398e-08	6.66503e-09	1.88408e-14	5.35949e-09	1.40301e-12	1.74213e-10	1.7751e-12	4.14092e-12	6.66127e-12	1.94684e-12	2.26461e-09	6.24044e-13	7.88568e-11	4.71625e-11	2.60108e-09
FLN	2.9226e-12	1.3161e-09	6.87276e-10	2.10106e-12	7.14277e-08	9.94426e-15	4.31605e-11	2.38785e-09	2.03751e-09	8.15449e-12	9.7396e-12	1.2112e-13	1.84869e-11	2.94511e-10	2.91579e-09	1.47268e-07	1.83823e-12	1.75849e-11	6.02282e-08	4.78885e-07	1.1892e-11	5.87842e-16	4.14626e-10	9.12797e-13	1.72989e-11	6.32265e-11	4.13672e-11	2.31236e-09	1.89295e-09	5.55419e-13	8.19136e-14	6.73608e-14	1.32719e-12	2.32546e-11	1.70032e-14	3.37231e-08	2.00044e-09	8.03417e-11	3.74413e-11	4.17396e-09	4.04566e-10	2.97585e-11	1.3637e-11	6.08355e-15	4.29001e-12	3.78254e-12	3.08987e-13	7.08304e-12	9.57082e-14
FLS	2.94453e-21	1.34497e-15	1.02347e-14	2.21925e-13	2.5751e-16	1.31019e-11	3.07604e-16	2.53349e-16	1.10266e-15	2.54412e-14	2.43377e-18	3.64719e-18	8.39095e-17	3.3739e-19	1.29874e-14	6.60846e-18	2.41451e-15	6.31623e-18	2.78906e-17	5.79667e-14	2.11223e-15	1.192e-16	1.55779e-13	4.45549e-13	3.35708e-15	8.35456e-12	1.39361e-14	2.04519e-14	1.8684e-14	1.23387e-14	7.04995e-15	3.2419e-13	2.19395e-16	3.81387e-16	1.49796e-18	1.37275e-15	9.80814e-17	7.41548e-16	2.76033e-16	6.57691e-14	4.99161e-22	5.53814e-13	1.16187e-26	3.3765e-14	1.54528e-14	6.83751e-18	3.83731e-16	1.39306e-16	1.51672e-15
FLT	2.03312e-09	2.80768e-09	1.06684e-08	8.89457e-16	1.35551e-11	5.62334e-14	3.58233e-07	3.36985e-12	1.22176e-10	1.67397e-09	9.18756e-11	1.38891e-13	1.63459e-09	4.94465e-09	6.00503e-11	1.34633e-08	3.33468e-12	1.32399e-12	5.86142e-11	4.79016e-13	4.04853e-10	1.23687e-11	6.68653e-11	2.67854e-12	3.86503e-13	2.89195e-13	1.66059e-12	5.68498e-09	2.46666e-10	7.7642e-11	1.38547e-10	3.97371e-07	1.30495e-15	5.13706e-10	1.64925e-09	4.82505e-12	8.15104e-11	1.94969e-10	5.49667e-07	1.76093e-12	5.0164e-09	1.79267e-10	1.73483e-11	2.65802e-08	4.26234e-09	7.56259e-10	3.70247e-11	7.91699e-10	1.95435e-07
FLV	1.23476e-17	5.57638e-14	1.34094e-15	1.53185e-16	9.41456e-18	1.25119e-14	1.20684e-14	1.26065e-17	6.73151e-17	1.4795e-16	8.07673e-16	8.35634e-15	7.40506e-15	8.24564e-16	1.81834e-14	3.32352e-19	3.49233e-15	2.6913e-18	3.76236e-19	7.97628e-14	1.3043e-13	7.8229e-15	1.31109e-16	1.08363e-16	2.06381e-19	9.70156e-19	4.76445e-18	6.94638e-13	4.23804e-17	5.60186e-16	2.94057e-18	1.64879e-22	4.55125e-14	6.86124e-15	7.82677e-21	3.78176e-20	2.84765e-21	4.58936e-12	7.18195e-16	1.50698e-15	5.76046e-15	7.61225e-16	1.47792e-21	6.75954e-15	1.03819e-16	2.63633e-12	1.07435e-12	4.17018e-14	1.59641e-18
FLY	1.43243e-18	1.90147e-21	6.36432e-22	2.28847e-21	3.32737e-19	6.57577e-20	3.07588e-19	3.94635e-19	4.24314e-13	3.15536e-24	5.73749e-20	2.74382e-15	1.91907e-20	8.00151e-23	2.89309e-20	3.91328e-19	2.32213e-19	5.84538e-24	1.09327e-24	3.15579e-26	1.36792e-22	6.14092e-24	6.67445e-17	9.89401e-23	1.58293e-18	3.98849e-21	3.71674e-18	2.7646e-23	3.49287e-21	6.68935e-22	1.46152e-24	1.80612e-20	5.16741e-20	5.08785e-23	4.75899e-21	1.98829e-18	3.56389e-23	4.95099e-22	3.93595e-21	2.29651e-20	3.27485e-23	8.42927e-21	6.01658e-26	2.67087e-20	4.11692e-20	4.51707e-20	6.96418e-26	3.77302e-22	8.22096e-27
FN	1.32337e-15	9.20182e-18	4.58031e-15	3.51496e-16	9.46257e-15	1.36335e-11	4.24304e-20	2.28077e-14	2.18378e-17	2.83021e-17	1.45035e-13	2.45282e-14	1.79494e-20	1.62666e-16	5.68151e-20	3.3307e-20	6.52503e-15	1.29008e-17	5.82983e-15	5.99451e-14	1.02334e-15	7.57105e-18	3.16663e-19	2.564e-14	1.33503e-19	4.89088e-14	1.66884e-16	6.63271e-09	1.35943e-12	4.81532e-16	3.09545e-23	5.10757e-22	1.6886e-20	2.67566e-17	1.90958e-13	7.12648e-17	3.10734e-15	1.02196e-19	2.26753e-08	4.09122e-11	4.7952e-20	2.53431e-24	1.06117e-17	1.82374e-19	1.9905e-12	1.40309e-16	7.61562e-15	2.15838e-13	1.76627e-12
FND	1.20401e-12	4.15204e-12	4.41712e-11	2.59556e-12	4.74266e-09	7.64115e-11	3.83224e-11	2.50142e-12	9.48475e-11	4.67835e-11	3.4849e-12	1.27663e-10	1.19148e-12	1.83285e-12	8.60332e-14	2.23589e-10	8.92742e-12	1.86338e-12	2.25937e-14	8.87424e-12	3.75926e-11	4.97366e-11	7.49656e-14	1.51954e-08	3.57582e-11	7.03275e-11	2.23105e-07	9.74385e-10	9.03344e-14	8.22847e-10	1.11186e-15	8.65897e-13	1.01846e-10	5.55388e-13	2.06219e-14	3.61521e-12	8.18502e-10	1.03168e-13	7.94303e-10	5.98426e-12	3.94531e-13	2.17503e-12	1.44245e-14	6.74657e-11	1.52935e-08	2.63536e-11	4.48534e-11	8.60277e-11	8.19948e-10
FNN	2.43792e-09	7.90408e-08	1.73015e-07	9.33016e-09	2.28989e-08	5.751e-08	1.00758e-10	2.51951e-09	1.03764e-09	1.93406e-07	8.4542e-11	4.2719e-07	5.64211e-08	2.89392e-10	1.901e-10	4.88267e-08	1.88022e-07	6.40373e-08	3.74388e-07	6.43362e-11	8.67892e-07	9.36487e-09	9.28968e-11	3.20681e-09	1.14305e-06	4.29942e-07	3.96744e-07	4.06737e-06	2.84049e-10	2.58239e-08	6.70195e-12	2.61445e-10	8.75903e-09	4.55302e-08	2.15398e-07	1.12369e-09	9.28968e-11	1.06153e-06	1.00706e-09	2.8544e-08	5.78543e-12	2.81299e-09	1.73592e-07	2.4261e-10	7.73244e-10	1.82424e-11	7.32411e-10	7.10344e-08	3.79686e-09
FP	1.16845e-27	3.99284e-25	1.37674e-28	5.13936e-32	4.01417e-20	9.70555e-31	5.73946e-27	2.88557e-27	2.57829e-25	5.26896e-23	1.80174e-21	4.82275e-30	9.54286e-26	2.33624e-21	3.08761e-19	2.47939e-19	4.87175e-30	7.02348e-23	1.29926e-27	2.86863e-27	4.51487e-20	2.91133e-28	2.35186e-18	7.53115e-30	6.64965e-27	2.13111e-25	3.22642e-25	4.9742e-26	2.56555e-18	5.41798e-24	6.53791e-20	5.97244e-27	3.80005e-22	7.98776e-22	9.33136e-27	8.72572e-25	1.23665e-24	1.2686e-24	3.37287e-20	1.61966e-24	5.29946e-28	2.68368e-33	1.61919e-21	9.45875e-20	9.59316e-23	2.24628e-24	1.73167e-24	5.25346e-30	9.93678e-17
FPD	4.00479e-11	1.9608e-09	1.46861e-13	1.03424e-11	6.9566e-10	7.79922e-09	5.91996e-13	5.54923e-14	3.9231e-12	2.1692e-09	3.50849e-10	1.70207e-09	3.37944e-12	7.635e-08	4.64583e-08	8.67425e-09	2.49822e-10	2.98352e-10	6.51014e-09	3.61989e-07	2.01458e-08	2.36895e-13	7.38006e-07	7.72944e-13	5.37237e-09	3.95872e-09	8.41429e-10	2.61178e-10	4.78847e-09	4.25202e-09	2.30369e-12	1.60087e-09	1.89028e-10	6.13232e-10	3.49171e-10	4.36203e-10	1.32883e-09	2.89015e-08	3.1622e-12	3.58147e-12	1.11407e-13	1.47674e-10	1.54028e-09	8.29638e-08	6.18789e-10	4.75612e-09	4.42596e-10	8.63702e-11	1.85275e-08
FPE	4.96487e-27	8.47308e-24	1.85581e-26	6.45619e-28	7.99668e-31	3.89837e-30	1.93974e-27	2.80082e-25	3.94754e-28	6.68695e-27	2.24034e-24	2.05596e-26	1.05361e-28	1.27851e-29	1.38234e-24	5.5961e-26	4.24971e-27	1.44106e-29	2.96041e-27	2.71306e-21	7.7691e-23	2.35714e-28	6.25777e-24	6.99727e-33	7.76074e-30	4.66315e-27	4.9234e-27	2.80649e-25	1.88472e-21	1.14266e-25	8.34595e-25	2.64554e-30	2.33604e-23	4.81837e-28	6.36643e-31	9.0249e-25	6.23316e-29	8.2221e-24	3.28759e-29	8.29067e-28	1.50219e-25	1.46474e-31	9.96902e-28	3.37836e-29	2.83098e-24	2.01804e-26	1.83582e-31	6.64534e-28	9.82982e-26
FPK	2.46181e-22	5.9125e-24	5.56338e-23	4.00388e-24	1.80007e-23	1.62039e-26	2.62457e-28	4.73824e-27	3.47959e-24	4.01188e-22	7.12592e-21	6.47752e-26	6.91329e-26	5.79273e-25	3.34393e-19	3.81558e-26	3.79304e-27	2.84846e-24	3.71498e-21	3.9639e-24	2.34582e-26	1.2493e-26	1.07023e-23	2.39947e-26	1.23351e-22	2.22212e-24	6.96254e-26	2.16687e-22	2.19048e-24	4.76942e-25	8.55169e-23	1.80482e-23	9.10042e-24	2.83085e-25	4.76252e-27	2.05953e-25	7.53753e-23	2.85284e-23	2.80591e-25	1.74324e-26	3.02385e-26	6.73055e-21	3.72341e-23	1.24948e-23	6.47672e-25	3.307e-22	2.3292e-21	1.69162e-25	4.94804e-22
FPL	9.89901e-08	5.16302e-12	5.18115e-12	8.36514e-13	2.39666e-09	6.70212e-13	1.76464e-06	3.32998e-10	3.58204e-11	1.56558e-10	2.93371e-09	1.5225e-09	1.75939e-08	5.60615e-07	2.81849e-11	1.39855e-08	2.93228e-12	7.0918e-09	1.96578e-10	1.27206e-12	9.15679e-12	1.40924e-08	4.50438e-09	5.56685e-12	8.62853e-13	1.06733e-09	5.21058e-10	5.23638e-11	3.15478e-08	2.68597e-08	2.30284e-09	6.63688e-08	1.76251e-12	3.68359e-12	6.32856e-11	1.69646e-10	1.84496e-11	2.35415e-10	3.74401e-10	1.1208e-08	1.50775e-08	1.99426e-10	5.48515e-11	1.19826e-09	3.40606e-10	1.44205e-10	1.35352e-12	2.21231e-10	3.92581e-06
FPN	3.52845e-12	1.28097e-13	4.82557e-13	5.38553e-18	3.10685e-10	2.99527e-15	8.35657e-13	1.1736e-14	3.96491e-13	2.7246e-13	2.01321e-12	1.61127e-13	4.51943e-16	2.62469e-16	8.09796e-11	4.52443e-14	2.97912e-14	1.53541e-13	3.70467e-15	1.3978e-15	4.37761e-14	5.07785e-13	1.71845e-10	3.38974e-15	8.93524e-16	1.19617e-14	3.99598e-11	1.26648e-14	5.21639e-09	3.48248e-12	3.00392e-11	9.63977e-13	6.95781e-12	7.37861e-16	1.99274e-13	2.39555e-12	5.27907e-15	1.65388e-13	2.03018e-17	2.19381e-14	1.05117e-14	2.05575e-14	1.02924e-12	1.58102e-10	8.20626e-14	1.44552e-13	1.61773e-14	7.73648e-17	2.78623e-10
FPQ	2.15754e-15	4.75254e-13	5.45491e-16	4.95089e-13	1.24536e-13	1.18081e-13	9.5368e-11	4.27762e-12	3.39264e-14	1.03514e-12	6.71704e-09	1.67064e-15	3.38212e-10	5.09125e-13	1.31601e-12	3.20385e-11	1.86108e-11	2.12902e-12	5.7826e-12	5.72269e-15	3.75839e-10	3.5145e-12	1.69951e-11	3.03161e-13	1.4313e-12	4.6987e-12	1.01247e-14	4.38376e-12	1.63668e-12	2.78565e-11	2.17009e-11	1.08432e-12	1.94764e-10	2.84659e-13	2.16477e-12	1.11638e-09	2.07428e-10	4.17605e-13	6.52974e-13	6.44557e-11	3.8069e-12	6.77343e-12	1.60252e-13	4.77597e-12	1.21468e-09	1.17471e-12	1.24272e-09	4.99385e-10	5.64227e-15
FPR	1.78659e-11	7.95105e-14	1.47319e-12	3.5905e-14	1.92302e-13	4.37839e-11	1.50424e-12	6.37352e-13	6.54754e-15	7.91002e-10	8.31275e-12	4.86364e-12	6.24722e-11	5.00868e-11	3.54614e-13	2.52876e-11	5.12681e-14	1.31634e-15	3.49205e-11	1.25835e-12	2.15739e-13	4.57672e-17	5.2747e-12	1.68882e-15	1.99294e-13	1.29895e-13	3.5831e-14	4.60074e-13	1.06616e-12	2.31622e-14	8.58632e-14	7.14216e-12	1.88044e-12	1.62255e-10	5.74084e-12	2.48544e-14	9.03118e-14	1.02517e-16	1.99247e-11	8.67353e-14	8.23502e-15	2.65045e-12	6.62492e-11	2.41498e-13	5.63619e-12	2.01039e-15	4.16256e-14	5.88723e-13	3.49087e-13
FPS	6.12182e-15	5.63254e-14	1.67678e-15	8.17023e-16	3.25338e-13	2.97035e-18	2.13689e-12	1.24024e-17	5.38299e-15	1.63222e-12	1.61847e-14	8.94396e-20	2.37545e-11	4.42158e-17	6.57746e-11	5.45403e-13	2.38268e-16	5.97797e-16	4.02757e-16	1.83422e-14	1.17238e-14	1.65108e-17	9.30314e-12	1.96399e-15	4.48816e-18	4.4088e-15	9.73644e-15	6.419e-19	2.03392e-15	4.61417e-15	2.72574e-18	2.41594e-15	7.15808e-16	5.17026e-12	1.05167e-16	5.91387e-15	1.31966e-15	6.64694e-15	4.81611e-16	1.70852e-14	1.26524e-16	6.98612e-15	1.69507e-13	6.91691e-12	2.80416e-12	4.48581e-15	8.24364e-20	1.4997e-14	4.56999e-12
FSG	3.89718e-11	2.10376e-12	6.84836e-08	2.30643e-10	3.64782e-10	3.00739e-07	2.16772e-12	4.28611e-08	4.4083e-12	1.32373e-12	2.44237e-10	7.08765e-12	1.99744e-13	1.19718e-10	2.71832e-11	8.42819e-09	8.46964e-10	8.32561e-10	3.23407e-13	2.76842e-10	1.226e-09	8.56938e-10	1.30946e-09	5.77065e-15	9.67796e-11	5.99781e-11	2.50297e-08	1.14775e-10	5.51613e-09	1.874e-09	1.98531e-10	1.67862e-12	2.11919e-08	1.70041e-06	3.84684e-10	3.08651e-08	1.09615e-11	6.96804e-11	3.66956e-15	7.00307e-08	3.52856e-09	1.2921e-07	4.35359e-14	1.20956e-08	8.97268e-11	1.01765e-10	6.25932e-11	1.70562e-11	5.1067e-07
FSK	2.49375e-11	3.23283e-10	5.83715e-08	1.31152e-07	2.24432e-08	6.83077e-12	8.94319e-10	5.05761e-10	8.77493e-13	1.02547e-10	6.75583e-11	3.29498e-11	1.29403e-09	3.61033e-11	5.88334e-09	2.5051e-10	8.91217e-07	1.54045e-08	2.2356e-09	4.07718e-08	3.14274e-10	1.08752e-11	5.95145e-09	5.86698e-11	3.91615e-06	6.84717e-08	9.55208e-12	1.31764e-09	2.22272e-08	2.04222e-07	4.33214e-11	3.40458e-10	6.14632e-11	4.7263e-10	3.68296e-11	4.86995e-09	3.51345e-09	4.69636e-09	3.89772e-09	6.72762e-10	5.89181e-09	2.16586e-10	2.12971e-11	3.48556e-10	2.28829e-06	2.5208e-08	2.76271e-06	9.27969e-08	2.79737e-08
FSY	7.8144e-18	5.10304e-16	2.34675e-12	7.38018e-14	1.35268e-16	4.7784e-17	1.89374e-16	1.35851e-16	2.04339e-15	5.59748e-14	8.61531e-17	5.17438e-19	1.365e-15	1.59125e-19	5.62508e-12	5.13263e-13	1.47719e-20	1.74317e-17	1.00454e-16	3.0081e-14	5.83748e-16	3.44613e-15	3.08541e-17	1.67765e-15	5.59743e-16	4.6036e-17	4.16009e-16	5.6138e-12	2.55465e-15	5.01541e-14	4.88182e-14	3.8446e-15	2.18216e-16	3.46014e-15	6.85612e-15	3.52988e-12	4.0623e-17	1.78204e-20	1.22766e-17	7.96614e-12	1.32673e-16	4.67136e-16	2.66492e-14	3.83403e-14	6.66616e-15	9.85191e-17	4.78404e-18	8.0383e-17	2.77732e-16
GC	7.53598e-13	2.84733e-15	9.51872e-12	1.04085e-08	4.11275e-11	2.0876e-16	1.45495e-16	6.49964e-18	1.21925e-19	2.8997e-10	1.79012e-14	1.36795e-08	3.19869e-08	7.81833e-21	1.08299e-11	9.52839e-14	1.90978e-10	3.61245e-14	6.4335e-11	2.79101e-18	8.04008e-11	2.93621e-11	6.9226e-22	6.26126e-15	1.41158e-14	3.84459e-14	9.73414e-12	1.88006e-16	6.66184e-14	2.06059e-11	1.58523e-11	2.51453e-12	1.04345e-12	1.1076e-13	1.42415e-16	2.68095e-15	7.6e-11	3.6421e-15	2.82578e-14	1.89243e-10	1.7291e-18	5.62537e-13	1.27719e-18	7.6502e-17	2.35284e-15	1.13047e-09	2.08119e-20	2.48098e-09	1.14308e-15
GCK	1.81549e-09	3.34175e-08	1.86766e-07	1.18145e-07	7.16938e-08	5.10735e-09	2.58319e-07	1.43924e-09	1.68029e-10	3.10646e-10	1.04695e-08	9.43104e-09	1.84081e-09	1.40349e-08	9.26702e-11	9.1875e-09	4.7672e-09	4.90706e-08	3.19827e-10	1.1539e-10	2.96643e-09	1.03151e-11	4.03362e-09	3.31928e-09	5.24591e-09	3.01868e-09	1.88334e-07	3.0481e-09	4.81384e-07	1.39831e-08	8.61342e-08	8.8377e-11	3.46105e-10	4.3311e-09	8.54514e-12	3.47888e-06	2.24733e-07	5.77657e-08	1.37271e-08	2.96729e-07	1.17891e-10	1.28721e-09	4.06617e-08	1.7237e-10	1.07492e-11	4.48342e-09	4.73986e-09	3.38412e-09	4.75909e-10
GCP	2.5714e-10	1.14171e-09	8.73308e-07	1.01233e-08	3.07387e-09	1.08847e-09	3.26932e-10	8.84405e-10	2.19711e-08	9.26116e-09	4.0415e-08	3.21423e-06	6.49302e-08	9.63799e-10	3.70783e-07	2.51856e-10	1.66949e-08	9.25004e-11	5.85951e-09	8.72653e-09	3.08744e-08	1.06646e-06	2.58871e-09	6.86736e-10	9.73471e-10	3.70885e-13	6.87422e-08	9.73471e-10	1.01189e-10	1.24595e-07	8.16297e-10	1.3503e-06	1.09412e-08	1.05013e-09	4.77308e-08	2.33161e-09	2.87889e-09	2.41937e-06	4.65784e-14	3.31975e-09	7.65936e-11	1.92964e-08	2.07096e-10	2.77076e-10	9.8208e-11	1.00758e-10	1.48371e-07	1.86157e-07	6.76375e-12
GDF	4.6324e-14	8.04249e-14	1.1782e-14	4.00654e-15	1.26976e-12	1.307e-12	1.16839e-12	2.39066e-12	2.98998e-12	1.02157e-14	5.25228e-17	2.24597e-18	6.32445e-12	3.97683e-13	1.59213e-13	4.21964e-13	8.66656e-15	2.31191e-13	1.68021e-10	7.17401e-12	3.9202e-11	8.64941e-12	1.07083e-14	3.69228e-16	4.30644e-13	2.38689e-13	3.17551e-12	2.74219e-10	1.48837e-09	1.42571e-14	6.07546e-10	1.86601e-14	1.35868e-15	6.38456e-13	4.99386e-12	1.17402e-12	1.35109e-12	1.65501e-11	1.78111e-11	1.33921e-10	2.60863e-11	2.20384e-10	8.08894e-14	5.29052e-16	9.53874e-14	4.15761e-13	2.33184e-12	2.23951e-15	1.57109e-14
GED	4.04604e-10	3.71256e-12	3.54493e-11	6.26746e-12	7.51272e-08	1.70833e-10	1.73467e-11	9.92997e-09	3.50783e-08	1.33791e-09	4.14258e-11	1.64673e-10	1.02477e-10	4.44898e-11	6.04363e-10	4.59522e-08	1.45184e-09	4.83861e-12	5.76956e-13	7.53819e-11	7.59927e-10	6.51166e-12	3.33443e-09	6.93196e-11	4.41574e-12	4.33194e-12	2.59605e-10	8.2361e-09	1.65315e-09	6.01798e-10	6.85373e-08	3.31925e-11	2.27354e-09	2.50075e-07	2.90886e-08	7.32745e-09	5.1009e-11	1.15937e-08	2.43304e-12	5.07661e-12	2.31432e-09	2.5315e-12	9.61399e-13	3.50719e-11	8.29266e-10	9.9607e-10	6.87554e-12	3.58412e-09	2.19822e-10
GEI	1.53289e-13	2.6236e-11	5.37723e-12	1.69441e-15	1.04049e-12	9.47665e-11	4.67691e-08	2.78908e-12	1.37631e-10	8.43175e-12	9.02821e-13	2.50621e-13	3.89004e-13	4.3145e-10	3.65993e-12	1.31677e-11	1.03275e-13	1.67354e-13	2.68696e-13	2.67669e-11	1.24209e-08	2.51183e-14	5.41745e-12	5.60887e-14	8.25289e-11	4.07524e-13	5.68989e-14	1.39913e-12	2.3001e-11	5.28646e-14	1.09383e-11	1.8577e-11	1.02605e-09	6.07177e-11	2.9206e-14	7.31239e-09	9.90351e-09	9.20731e-11	9.63567e-15	2.19894e-13	4.03642e-10	1.09833e-08	4.0949e-14	2.74031e-12	1.90672e-12	9.21212e-12	8.97133e-14	1.01792e-12	9.06515e-12
GEL	7.19101e-15	1.7512e-18	1.24113e-12	1.68614e-15	7.72972e-15	1.03016e-13	6.61218e-18	6.01671e-15	9.62781e-18	4.94101e-17	2.35048e-16	1.14429e-19	1.75104e-18	1.97379e-15	2.85117e-18	4.03908e-19	2.13325e-17	1.03672e-17	4.98583e-23	5.15673e-22	3.68212e-21	4.4592e-18	8.51396e-19	2.45299e-16	1.8824e-16	3.72746e-18	4.11483e-13	9.49633e-14	2.75054e-18	1.25038e-13	3.85577e-21	4.21966e-22	1.25338e-11	1.87891e-20	8.61229e-18	1.72703e-15	2.28092e-18	1.71717e-19	2.19511e-18	1.93518e-15	4.48345e-19	4.84612e-12	9.57098e-16	8.63014e-15	5.66299e-20	1.44028e-12	1.04537e-18	2.69232e-19	5.2704e-13
GFI	1.07431e-13	8.24173e-15	3.00114e-16	1.03366e-16	2.27755e-15	1.34317e-13	4.9522e-12	4.25083e-15	1.00018e-12	1.59044e-14	1.20509e-18	1.97229e-17	1.05021e-12	2.3486e-13	7.2376e-18	1.16964e-14	2.94341e-16	2.77052e-14	5.39223e-17	2.01921e-13	5.2678e-17	7.74435e-17	2.64878e-15	4.30802e-15	9.89496e-18	9.94496e-13	1.93715e-16	7.09717e-11	3.09861e-14	8.47996e-17	2.0328e-17	5.55107e-14	9.9586e-20	5.58852e-13	2.09968e-17	8.189e-17	1.30971e-15	6.4699e-14	2.44363e-16	2.10877e-11	2.71042e-14	1.0808e-14	2.66548e-16	3.0272e-17	2.40506e-17	1.87712e-13	1.54409e-16	6.61141e-12	4.44543e-13
GGL	7.73766e-12	1.4907e-11	1.20049e-16	3.90845e-14	1.38773e-11	1.80159e-14	2.2389e-14	6.41935e-15	1.36863e-16	2.9652e-13	6.12211e-16	7.33868e-19	1.35861e-13	1.05245e-12	4.56003e-16	1.86721e-14	2.0823e-14	8.77703e-15	1.5819e-19	4.87177e-12	4.0095e-15	1.36376e-15	1.35502e-14	4.43794e-13	8.39294e-15	1.32215e-14	2.00247e-11	3.24513e-15	2.79656e-16	1.62407e-16	1.62928e-14	2.29594e-20	2.86988e-14	2.693e-12	2.29838e-14	2.06914e-12	3.39087e-15	6.3546e-12	7.82941e-15	4.28451e-11	8.56958e-17	1.53099e-11	8.05921e-21	1.65158e-15	3.2973e-14	8.90043e-15	8.50326e-16	3.7982e-14	3.2749e-19
GI	9.759e-10	1.09974e-14	1.67873e-14	1.12825e-12	6.67382e-15	1.95816e-11	1.46289e-10	5.18096e-09	2.83305e-10	2.92344e-12	1.12267e-11	2.83316e-15	7.71632e-15	2.16933e-14	1.84676e-14	5.3561e-08	2.43402e-13	1.62265e-11	2.37581e-14	6.28026e-07	1.66465e-08	6.02398e-15	9.91969e-14	1.27011e-12	6.45421e-14	8.79459e-11	5.36753e-14	5.97634e-12	7.25199e-12	8.47686e-10	6.14203e-16	2.52754e-10	6.09734e-16	5.94842e-15	3.84609e-15	2.60245e-10	2.91257e-11	6.68976e-15	5.83829e-15	5.49812e-12	2.71886e-10	1.30855e-09	2.21446e-13	1.21582e-12	9.37084e-10	4.03236e-10	1.13595e-11	3.18179e-11	1.39164e-15
GID	4.52994e-09	2.13853e-12	8.29155e-13	5.91887e-14	3.42837e-11	1.38976e-09	2.0118e-08	3.05276e-11	4.42325e-09	5.4666e-10	2.54615e-08	2.01086e-16	3.46732e-10	1.6886e-08	7.97265e-15	1.35799e-09	5.04849e-11	2.73191e-10	4.0371e-12	3.91952e-09	2.76899e-11	3.16687e-08	1.05473e-10	4.32517e-10	1.69463e-09	2.4272e-07	1.00252e-11	1.38975e-10	4.31511e-12	4.92742e-10	2.70314e-11	7.31319e-09	5.18237e-12	2.86579e-11	7.44997e-12	3.63149e-09	1.39483e-06	2.11756e-10	2.96873e-10	6.27529e-11	5.4105e-10	2.41881e-12	2.59347e-09	2.79889e-10	4.46206e-08	1.25133e-07	3.7363e-09	2.84682e-08	2.51977e-09
GIG	7.69549e-15	9.89899e-24	1.65282e-23	5.11025e-23	1.99924e-24	1.03583e-19	2.65753e-20	7.17911e-22	1.59961e-24	6.12411e-23	2.45553e-21	2.78031e-25	2.50579e-21	1.02067e-18	6.72535e-21	3.92876e-19	5.39867e-24	8.88793e-27	2.51969e-27	1.62894e-22	2.71377e-20	3.02116e-24	4.79086e-23	1.18157e-20	1.99846e-23	2.44004e-23	1.03325e-22	4.09167e-18	1.26768e-17	5.54311e-23	5.56441e-20	4.30535e-25	4.51622e-21	2.0271e-21	1.5668e-21	1.2735e-22	2.23783e-22	6.19798e-21	1.57798e-20	3.24943e-22	8.96425e-19	4.5843e-19	1.03482e-24	1.20778e-25	1.98649e-24	7.68091e-22	3.0534e-19	1.80784e-24	6.59672e-25
GKL	8.29182e-24	9.25139e-27	1.51522e-20	3.77051e-28	2.50929e-24	2.67018e-19	9.07171e-27	4.05296e-25	6.11205e-22	1.30004e-27	3.2634e-27	6.40753e-23	7.13539e-24	2.94352e-22	5.81887e-31	1.86787e-21	1.61747e-22	2.88711e-25	4.29145e-21	1.30063e-21	1.26491e-25	1.86086e-24	3.35329e-21	1.6196e-24	4.47668e-21	1.30587e-28	1.94665e-20	1.03426e-19	2.61162e-23	1.76013e-23	4.45553e-24	4.5493e-20	1.60852e-25	1.54591e-17	1.38078e-20	1.38078e-20	1.94371e-25	3.42523e-29	7.56955e-21	2.87669e-27	2.06678e-22	1.61817e-25	1.10338e-20	3.59509e-26	1.51711e-21	1.37272e-25	4.87993e-23	1.88834e-24	6.50289e-26
GKR	2.86296e-12	2.90109e-11	1.03474e-09	2.17288e-10	4.52544e-07	1.04541e-09	4.98051e-12	2.77733e-14	3.10632e-10	7.49587e-08	2.54552e-10	2.02294e-10	1.40408e-07	6.72223e-10	3.57835e-07	1.62299e-07	6.07489e-09	7.51897e-12	8.48462e-12	2.93194e-08	9.09009e-09	2.58969e-14	6.91614e-11	1.93746e-08	1.55201e-09	8.7167e-12	1.09224e-10	3.9502e-08	3.08591e-12	1.75085e-12	3.50281e-08	1.25223e-09	2.15831e-11	1.39148e-10	3.29044e-10	1.09489e-11	9.97178e-13	1.58979e-11	1.13893e-10	7.71932e-09	2.77208e-12	1.97199e-10	6.56968e-11	2.75748e-14	1.54233e-13	2.71395e-15	2.49466e-09	4.03205e-11	8.48073e-11
GKT	2.84454e-62	1.27965e-59	1.90729e-56	1.21618e-55	7.93459e-49	8.59954e-55	5.22629e-59	5.38048e-58	1.1977e-60	7.58734e-57	1.63634e-57	3.14077e-69	7.66286e-62	4.90036e-54	4.22229e-58	1.89015e-59	1.94937e-58	3.7311e-59	5.17329e-62	1.79753e-53	1.56686e-67	8.04632e-59	4.08158e-56	1.24874e-56	1.65934e-58	2.6349e-58	9.52114e-62	4.76437e-59	1.09422e-57	2.66708e-56	6.52146e-61	4.87652e-52	1.16409e-65	7.35112e-64	2.09659e-54	3.26879e-61	3.15832e-64	1.54129e-63	1.9398e-57	1.21931e-58	3.5446e-61	1.42272e-60	1.42272e-60	7.34418e-56	1.09915e-60	2.35509e-54	1.72176e-53	7.4762e-62	3.39851e-53
GLE	1.00204e-11	8.68179e-15	4.298e-11	7.44496e-14	1.59336e-13	3.93283e-13	1.91643e-16	1.29947e-12	3.87246e-13	2.02967e-17	2.01804e-14	5.37157e-09	7.58414e-12	1.79821e-11	1.61926e-14	1.64052e-12	4.34025e-15	1.22372e-14	1.52598e-16	2.40187e-14	3.68424e-10	7.68394e-12	3.23105e-13	2.07638e-16	3.71331e-12	1.19329e-13	4.27802e-12	5.58581e-09	5.80584e-15	4.58839e-15	1.5618e-15	4.67222e-15	1.44946e-14	5.87115e-11	1.97021e-12	4.20906e-16	6.65009e-15	6.09311e-12	6.11818e-14	2.04504e-10	7.17654e-13	8.03368e-09	2.14078e-13	2.68769e-14	6.45685e-15	8.30141e-11	8.36574e-17	4.83419e-15	4.43186e-14
GLG	2.41919e-10	7.31343e-09	1.32722e-10	3.2521e-14	2.94627e-11	3.37323e-12	1.41347e-14	6.5752e-15	7.64896e-16	8.62551e-12	1.23456e-11	5.57984e-17	5.86455e-10	4.75052e-10	2.26632e-13	4.0541e-12	2.29051e-09	8.57942e-14	1.33683e-17	1.36257e-15	2.5546e-08	7.66084e-23	7.30148e-19	2.02271e-10	1.48331e-11	1.24251e-13	2.18726e-08	4.34553e-10	3.45968e-12	1.62216e-13	1.03785e-10	6.14743e-12	9.83522e-09	1.44419e-12	1.74017e-12	2.72248e-13	5.53448e-14	1.32524e-12	8.82237e-16	1.01825e-14	1.45842e-13	6.2403e-10	4.23835e-14	1.0414e-15	1.24812e-11	4.05386e-15	9.18431e-15	9.0195e-14	4.69149e-13
GLK	1.39449e-10	3.50941e-10	1.81686e-11	1.21915e-07	4.53186e-11	8.36968e-12	5.4433e-10	4.21109e-11	1.64778e-08	8.45784e-07	5.02413e-12	4.36859e-11	3.61819e-14	1.07821e-09	7.64214e-12	5.42092e-10	6.02944e-13	4.30215e-13	1.23615e-11	2.37749e-09	1.62401e-09	9.06718e-14	3.05804e-11	6.6996e-13	3.85061e-13	3.62799e-08	4.27187e-10	2.82192e-12	6.12419e-09	1.16569e-08	1.94178e-07	1.03964e-08	5.01233e-13	2.56735e-11	1.14357e-10	2.49591e-11	5.84648e-10	8.64551e-09	5.58115e-09	3.70851e-10	1.5123e-10	6.84576e-09	4.81286e-13	1.7397e-11	3.76009e-11	8.74227e-13	2.92668e-10	1.58052e-10	1.1887e-10
GLP	9.30116e-21	1.12098e-29	1.2715e-25	5.87408e-25	2.93321e-17	4.19214e-15	3.57362e-20	1.07736e-16	2.32409e-21	4.94156e-22	3.8531e-20	1.87923e-19	3.33492e-20	4.76502e-21	4.52717e-22	5.38659e-25	2.03623e-24	1.8733e-23	5.33501e-28	1.11996e-21	8.77383e-24	4.48409e-26	1.77773e-21	1.95499e-21	1.44385e-21	1.59069e-21	8.57866e-21	2.4311e-23	8.40691e-17	4.72882e-25	4.6551e-22	1.89547e-19	1.07344e-26	1.81028e-22	6.67046e-26	1.37895e-18	1.0795e-22	2.35851e-20	6.44209e-26	4.67627e-23	2.22613e-30	3.10548e-19	6.97494e-26	2.47383e-21	6.10777e-26	3.78894e-24	3.84901e-24	9.28648e-26	2.73886e-21
GLQ	4.42139e-13	1.85751e-12	9.14226e-17	4.79226e-17	9.04066e-13	4.15333e-13	4.73909e-10	3.93235e-14	1.8213e-12	1.19965e-11	3.86309e-14	9.59673e-10	8.58279e-13	1.78e-10	1.26942e-14	2.91332e-13	1.66946e-13	7.339e-14	1.19435e-15	4.60033e-15	7.44148e-11	1.67379e-09	8.89761e-12	1.10027e-13	1.86005e-10	2.3664e-13	3.94056e-13	1.07612e-13	3.17598e-14	9.26999e-12	7.51344e-12	8.39853e-13	7.26547e-15	9.40895e-14	1.39289e-09	1.12594e-14	1.51572e-13	1.55206e-17	2.46682e-15	1.50095e-10	1.8213e-12	1.71749e-10	1.73996e-13	6.09245e-15	2.26326e-13	1.45482e-14	3.11402e-12	2.65963e-18	9.63348e-12
GLT	4.11069e-11	2.58969e-09	1.0101e-11	3.4538e-10	5.11832e-10	4.6791e-10	1.203e-08	2.0644e-09	6.42035e-13	4.0704e-18	3.91819e-10	1.74848e-11	7.84265e-09	5.14123e-14	3.17166e-12	1.1169e-10	8.41631e-10	5.50416e-10	1.38036e-15	5.07566e-13	9.55292e-09	1.16518e-11	2.48458e-15	3.46412e-12	2.17282e-13	8.92239e-11	7.87127e-13	2.79994e-10	2.29413e-09	3.46957e-11	6.8794e-10	2.51896e-10	3.75927e-12	8.58359e-13	2.43304e-13	8.05588e-16	1.30454e-09	1.43431e-09	1.28265e-07	2.27833e-11	6.83773e-12	8.47881e-11	4.11116e-12	1.24224e-13	2.5827e-12	1.90403e-08	3.20595e-09	1.94727e-12	2.52893e-10
GM	2.4323e-13	6.23899e-12	1.57141e-12	6.1001e-07	1.18051e-12	1.18332e-12	2.29095e-19	1.43457e-12	5.38423e-12	1.95183e-12	1.17449e-19	4.22752e-11	3.92947e-17	5.42424e-15	3.51574e-13	2.2274e-11	1.05633e-13	1.36015e-11	1.92586e-14	2.74428e-18	6.55562e-14	4.13021e-14	7.7641e-11	3.27787e-14	1.19328e-11	3.8285e-17	1.10623e-15	2.04166e-11	8.87505e-12	2.57116e-12	8.01368e-17	6.11665e-17	2.14044e-11	6.67223e-11	2.89785e-10	7.70185e-14	9.72986e-16	2.25945e-12	5.82962e-10	2.22137e-10	2.552e-11	8.96821e-13	2.74246e-15	4.70457e-14	1.48914e-18	5.6438e-17	2.45508e-16	7.11064e-17	8.56254e-17
GMG	1.97508e-21	6.98803e-21	5.67536e-24	6.87487e-24	8.91553e-21	5.50802e-24	1.20966e-25	4.83496e-20	1.24364e-23	7.44201e-21	3.60186e-22	1.11643e-23	7.6805e-21	2.3987e-24	2.65969e-26	1.06313e-22	2.85554e-21	4.33049e-24	2.85035e-22	7.17082e-25	1.42725e-24	7.26343e-26	1.6392e-22	2.1691e-23	4.44302e-20	1.94153e-25	3.68257e-19	2.41596e-24	7.89172e-23	5.03776e-22	3.45513e-25	8.30728e-26	6.12132e-26	2.05351e-24	3.28334e-26	1.10582e-24	2.93187e-20	1.47e-25	3.10371e-24	1.3418e-25	2.49172e-19	3.15181e-23	2.7693e-27	6.28373e-24	8.60136e-26	1.25536e-23	6.20155e-20	1.18791e-26	1.9821e-26
GNL	7.00894e-30	1.33171e-26	6.70812e-28	5.40897e-35	1.99278e-28	5.41322e-33	2.07123e-27	2.81973e-33	2.02556e-34	5.9687e-27	9.81501e-42	3.49207e-34	1.90844e-30	1.25698e-31	1.77631e-28	5.12893e-28	1.19974e-34	9.29682e-34	5.86196e-37	2.64191e-32	8.47356e-34	5.16827e-38	3.05728e-28	6.43673e-35	2.81307e-33	1.47146e-31	8.6647e-31	4.2022e-34	2.46785e-29	1.81885e-33	1.41514e-31	3.96435e-35	1.09432e-36	2.59318e-35	8.32873e-36	8.68204e-33	6.10622e-36	3.81806e-37	8.11485e-35	9.31844e-34	1.79848e-34	5.04743e-34	3.06372e-38	3.36492e-34	2.79567e-35	5.41456e-29	8.97942e-30	4.55832e-35	5.64904e-32
GQI	7.14164e-09	2.25773e-08	1.097e-08	4.12745e-09	9.12551e-10	2.6257e-10	2.95571e-08	6.9262e-10	9.09222e-11	2.11229e-08	1.02922e-08	9.11497e-08	1.05791e-07	1.11351e-10	2.4146e-10	3.70265e-12	1.63647e-07	1.47267e-10	1.30167e-09	2.93819e-11	1.96633e-10	1.05728e-06	9.17974e-11	5.56556e-08	1.83014e-11	1.10844e-08	2.40779e-09	1.16486e-08	6.4106e-09	1.498e-10	4.76974e-06	3.99544e-09	1.16787e-10	1.43681e-10	1.12694e-08	6.93874e-10	2.67835e-12	9.53132e-09	1.81188e-11	2.80224e-10	2.19119e-09	1.7932e-06	1.73291e-10	6.16608e-09	1.28694e-10	2.51232e-13	8.73019e-08	9.82875e-12	1.23261e-09
GQL	1.33655e-12	3.72835e-11	4.14451e-08	8.5275e-12	1.27798e-11	8.7336e-13	2.93185e-15	3.83103e-13	7.57413e-12	3.15989e-16	7.57007e-11	5.32957e-13	5.57014e-14	2.20549e-09	1.14504e-12	1.01574e-08	5.69003e-12	1.15268e-15	1.16823e-11	2.57732e-11	4.1947e-12	1.77094e-14	2.87284e-13	6.5469e-14	8.01959e-15	1.38094e-09	1.13424e-10	5.21961e-12	3.91767e-09	1.67423e-14	2.38754e-15	9.29649e-14	2.49199e-15	1.82797e-09	4.0741e-11	1.79698e-12	4.63837e-12	1.09301e-10	8.55907e-11	1.18872e-13	2.1354e-14	1.22066e-09	4.04591e-13	9.72499e-12	1.86217e-18	7.42132e-13	3.05146e-17	5.19512e-14	1.96898e-13
GSL	2.03552e-20	3.51753e-21	2.88911e-19	1.9842e-20	1.08576e-20	3.32692e-19	3.33902e-19	5.11349e-16	5.20596e-19	2.41546e-27	1.67867e-20	1.42635e-19	5.5937e-20	2.86826e-20	1.56237e-20	3.34129e-15	7.83644e-25	4.23787e-20	5.54369e-14	4.10782e-15	3.62117e-22	9.70675e-18	8.91837e-18	1.50967e-23	3.35086e-19	1.72993e-22	1.58202e-15	1.16827e-16	5.13424e-23	1.49466e-22	5.30268e-21	5.97493e-22	3.12671e-23	8.58758e-20	1.4441e-20	5.6037e-21	3.69904e-18	7.14398e-23	5.02389e-19	6.25196e-18	3.84858e-22	2.47919e-22	1.5975e-20	2.01456e-19	3.18928e-19	2.66242e-16	3.4904e-23	2.48279e-19	4.0132e-27
GSR	2.67317e-14	9.95292e-18	1.00049e-18	2.20991e-16	1.5788e-19	1.14358e-19	2.8647e-17	6.44101e-23	2.38917e-19	1.67796e-12	2.95744e-15	7.49612e-20	1.01058e-17	2.53179e-18	1.77357e-19	2.121e-17	1.27303e-17	5.43365e-19	3.13724e-16	1.62891e-18	8.15989e-18	6.23697e-20	1.34093e-16	4.11312e-20	2.60756e-21	4.20039e-19	2.00233e-18	7.37207e-18	1.65944e-18	1.48135e-22	1.02344e-16	1.04488e-15	1.28863e-14	6.60724e-19	9.05595e-23	1.47937e-14	3.91256e-23	1.80965e-18	2.06012e-17	2.85956e-16	6.94906e-17	1.11953e-22	3.88528e-20	2.87343e-20	1.68396e-15	4.46397e-19	9.60358e-20	5.05862e-19	2.15598e-19
HD	2.60575e-20	4.62215e-13	1.50977e-15	4.06417e-15	1.07712e-16	3.75227e-20	1.19657e-09	3.3037e-17	1.00711e-13	2.22738e-11	1.92238e-15	1.5005e-14	1.20308e-20	1.9936e-09	2.50051e-18	2.65173e-15	8.96221e-11	1.34981e-16	1.109e-12	4.37765e-11	6.48418e-21	4.19096e-14	5.26991e-17	2.64798e-12	2.18876e-16	2.70122e-18	2.6747e-18	3.74084e-18	9.85044e-13	1.40615e-19	3.38713e-16	2.36543e-14	1.72434e-15	2.0903e-14	3.13773e-20	1.10278e-14	6.25875e-16	4.47746e-10	2.83126e-13	7.01607e-09	3.00234e-14	8.16509e-13	4.42316e-15	1.90939e-14	6.6209e-14	4.24105e-17	2.04659e-16	1.24163e-18	3.15532e-18
HDL	2.32782e-33	1.52452e-24	3.82379e-34	1.35539e-26	4.93886e-32	2.95805e-30	6.41681e-29	5.43859e-26	1.74481e-29	2.69388e-23	2.84347e-27	8.93619e-27	3.8021e-30	3.52504e-27	3.6306e-31	3.65395e-25	1.2228e-24	4.85015e-29	4.59287e-25	6.9101e-29	1.93823e-27	6.1867e-27	2.01724e-29	1.43892e-28	1.86762e-29	4.16053e-29	2.22217e-30	4.8665e-32	4.66211e-30	6.02515e-34	6.67414e-27	6.30097e-27	1.15552e-31	1.16082e-27	1.35401e-27	2.83782e-30	4.05407e-28	1.05115e-33	7.89834e-28	4.22725e-29	3.55048e-26	6.732e-29	4.5336e-28	1.52731e-29	3.20144e-26	2.45289e-28	2.49384e-27	1.41725e-28	6.35599e-29
HDM	4.59012e-14	3.5945e-11	1.61647e-10	2.20099e-13	2.24481e-13	1.16643e-10	3.24666e-12	2.12633e-13	3.8069e-12	4.6609e-14	1.60415e-13	4.70025e-11	8.77508e-10	2.20099e-13	7.82651e-12	6.02245e-13	1.65256e-13	2.76751e-12	3.90457e-12	5.34391e-09	4.68002e-11	3.70309e-12	1.03253e-10	3.09282e-12	3.06434e-12	1.00943e-12	5.72939e-11	7.54483e-13	4.27356e-14	9.93375e-12	7.61738e-13	2.62555e-14	4.6609e-14	7.47296e-13	1.80124e-10	9.45505e-12	2.1794e-13	3.33023e-12	1.22061e-11	1.30626e-10	7.47296e-13	4.07909e-12	1.74506e-13	8.79134e-13	5.03584e-11	4.6609e-14	4.05814e-11	7.15778e-13	3.90307e-11
HDV	1.22406e-08	1.36076e-07	1.87232e-10	3.29907e-07	5.29111e-12	2.04803e-08	1.44363e-11	1.69681e-09	1.44775e-10	4.43125e-10	2.49401e-12	4.32056e-13	3.96302e-11	1.23635e-07	1.04752e-10	1.77946e-11	1.25478e-09	1.87232e-10	4.8961e-11	4.55506e-10	1.37646e-09	1.83918e-08	1.08994e-12	1.75816e-11	9.24873e-09	1.3157e-11	1.42702e-12	3.30833e-09	1.48307e-09	1.58073e-12	8.11854e-10	1.29677e-10	1.57104e-11	9.23247e-07	1.62241e-11	4.11103e-09	3.04316e-12	3.50738e-12	4.58022e-10	6.7112e-11	3.43774e-13	5.33507e-11	4.52041e-12	9.09281e-10	2.23372e-09	2.08877e-11	4.48038e-10	1.82662e-12	1.75064e-12
HI	8.41127e-16	2.26038e-07	2.98078e-14	1.79435e-15	4.14203e-13	1.22896e-12	1.04445e-14	6.36596e-09	1.92263e-20	1.02173e-11	2.46515e-12	2.16139e-07	5.20329e-10	2.09264e-15	9.32557e-08	8.65617e-11	8.58738e-12	7.77186e-16	1.19631e-12	4.13375e-08	1.99883e-14	6.98005e-14	5.60273e-15	5.59636e-22	1.79435e-15	3.78284e-13	7.00594e-10	7.63591e-15	1.9077e-14	9.22756e-14	5.37897e-12	6.48974e-17	1.92928e-23	5.14495e-17	1.07101e-15	8.42887e-19	2.88194e-16	2.56398e-15	2.57383e-15	1.99615e-13	2.18839e-17	7.09144e-17	2.16703e-17	1.60471e-21	1.32245e-12	1.44607e-10	8.47798e-16	1.15523e-18	4.53695e-14
HIP	1.2014e-10	1.90281e-13	4.08646e-16	9.81782e-15	2.99103e-14	1.21179e-16	4.94167e-16	1.1847e-13	1.18755e-14	1.62953e-12	9.05238e-13	1.80221e-13	1.53222e-11	3.95235e-14	2.81153e-11	2.73649e-15	6.9473e-10	4.10802e-13	5.83665e-11	8.92488e-15	1.25622e-10	3.71516e-13	1.20482e-13	4.31506e-13	5.82592e-13	1.45471e-14	6.56837e-10	1.25252e-12	3.31098e-15	8.55627e-15	2.36578e-15	1.00894e-12	2.21827e-13	3.23045e-13	9.92405e-14	1.90737e-14	1.28871e-13	1.49887e-12	3.02432e-17	4.75061e-13	6.08098e-12	3.22201e-16	3.5052e-17	7.48907e-16	1.18953e-11	8.37943e-14	1.17489e-12	3.70473e-14	8.28841e-11
HL	9.76458e-30	1.38048e-21	1.4918e-31	3.64262e-22	1.78647e-23	2.89946e-31	6.11271e-24	5.33117e-25	5.14036e-28	4.05539e-28	2.94136e-19	3.25627e-20	5.86219e-23	4.72074e-26	1.21463e-25	2.81078e-25	2.55218e-33	1.2169e-22	3.72435e-29	8.76848e-27	6.02369e-24	4.43926e-26	1.24419e-20	3.32893e-18	2.89995e-29	2.38063e-22	3.60144e-27	2.72137e-21	4.86586e-26	1.3452e-40	5.86972e-27	2.0885e-22	4.14903e-31	7.16784e-27	1.33471e-23	3.49153e-22	3.88642e-32	9.3088e-27	3.83368e-29	1.94789e-27	7.06903e-29	1.57468e-26	1.69952e-25	5.58599e-26	1.75048e-28	1.77525e-18	2.18179e-23	5.06618e-31	3.99122e-23
HLD	1.44014e-12	4.46718e-13	6.30473e-14	2.54873e-12	1.9196e-14	3.18766e-15	6.40003e-12	1.93865e-12	3.09279e-13	3.83405e-11	2.02414e-15	1.4924e-09	5.18089e-15	4.83284e-11	7.84112e-16	1.39567e-16	8.91507e-15	4.73724e-15	1.75188e-11	5.58697e-13	1.75866e-08	3.16217e-12	2.30387e-13	3.67216e-15	4.28221e-13	2.31352e-12	6.35121e-12	6.55001e-08	9.78157e-15	4.78313e-13	1.41716e-11	3.27224e-14	6.60569e-15	7.34244e-14	5.54154e-12	4.57245e-11	2.64826e-14	4.78729e-10	1.33479e-12	7.66742e-15	2.88821e-14	1.10351e-13	1.83742e-13	2.63413e-12	2.6924e-10	6.46602e-12	8.71523e-13	3.12861e-13	2.72736e-15
HLE	1.49691e-15	3.67729e-15	5.55582e-18	1.37948e-13	5.18981e-23	1.13906e-14	4.44033e-13	5.79689e-17	2.23155e-17	1.48537e-15	4.48706e-15	1.41513e-16	3.17195e-19	9.58659e-15	1.53789e-14	1.37437e-13	3.50671e-14	4.84525e-17	9.46583e-16	1.63425e-12	1.60981e-16	8.37592e-19	4.51536e-11	7.80551e-16	1.43449e-15	7.88775e-13	4.94484e-15	1.65961e-17	3.38882e-20	6.49643e-20	1.46511e-12	1.3535e-15	2.195e-14	3.27802e-16	2.61353e-17	7.69804e-12	1.56556e-16	1.45126e-15	9.37841e-13	2.24798e-13	1.01194e-17	3.50455e-12	4.40415e-19	1.36337e-14	7.27333e-16	1.02302e-12	1.90904e-16	6.07867e-18	2.28862e-18
HLK	1.94838e-34	2.21276e-30	2.19055e-30	1.65004e-25	2.69394e-26	6.20575e-31	2.10138e-29	1.32527e-28	3.47396e-26	1.11753e-34	2.35721e-29	1.31246e-30	7.49575e-27	5.87326e-26	5.86429e-28	5.97436e-31	4.09476e-28	1.94871e-29	1.14777e-26	2.73807e-30	4.60179e-28	4.31407e-32	7.22983e-27	4.53639e-26	1.61655e-27	1.09547e-34	3.19637e-27	7.35197e-31	1.60927e-27	2.44015e-34	2.00004e-27	1.7278e-26	3.01869e-28	8.09294e-28	8.13118e-35	2.94585e-27	3.97141e-35	2.74511e-32	5.64873e-28	5.65004e-27	1.6312e-27	2.34085e-32	2.0245e-33	4.10235e-28	3.59138e-29	4.80126e-27	8.01341e-32	3.07187e-31	7.07113e-27
HLN	1.57059e-11	1.18917e-08	3.12988e-11	8.94174e-12	5.47249e-10	3.20307e-09	2.3438e-11	6.38222e-11	6.53206e-09	2.66414e-11	6.02263e-10	2.2226e-10	5.53818e-09	4.85381e-09	1.60086e-09	8.18451e-09	3.53407e-11	9.16155e-12	2.99763e-11	4.1768e-07	1.46124e-09	9.75672e-09	1.85215e-11	1.24926e-08	7.29415e-13	3.05706e-11	1.53033e-14	5.06246e-10	3.29355e-11	2.73046e-09	8.41429e-10	1.3318e-08	4.22144e-10	1.0817e-07	2.65175e-09	5.11784e-10	2.06127e-11	1.92689e-09	7.43497e-10	3.88195e-10	2.32566e-07	1.25375e-09	8.74648e-09	1.39084e-11	6.46652e-09	4.28058e-11	1.73818e-11	3.35747e-15	2.26645e-11
HLP	2.6543e-13	1.79433e-11	1.73276e-11	1.46723e-10	9.22225e-10	7.01998e-11	9.51337e-13	3.52404e-13	3.99007e-10	1.12084e-12	1.39623e-09	3.59113e-08	3.66828e-13	6.6494e-13	1.30747e-09	2.8672e-15	5.22381e-13	4.01799e-15	4.78939e-12	2.53796e-12	2.80575e-14	3.09391e-14	1.01306e-09	1.69677e-10	1.57623e-09	9.49635e-12	9.16327e-13	1.1382e-10	5.96644e-09	8.00882e-14	1.52058e-10	5.56499e-11	2.9043e-14	7.047e-12	1.889e-10	4.70777e-12	8.62272e-16	1.56444e-11	6.23631e-12	1.06366e-06	2.92106e-14	1.07478e-10	1.39421e-10	9.32309e-14	2.49501e-10	5.88044e-10	2.04953e-09	3.39227e-12	2.99056e-11
HLR	5.32212e-31	9.21569e-31	1.12379e-33	3.45172e-32	7.74521e-30	3.37802e-32	1.73464e-27	1.18904e-26	6.41583e-34	1.1955e-35	9.96873e-31	3.97768e-31	2.44656e-30	1.01369e-32	6.95021e-29	8.95166e-29	7.8322e-32	7.24432e-28	1.1e-31	7.43413e-31	1.67355e-30	8.23889e-31	4.94058e-28	5.42074e-31	6.55241e-31	4.01757e-29	7.97765e-34	1.15606e-35	5.98821e-26	1.0253e-36	1.12692e-28	2.45616e-31	4.63568e-32	1.33612e-34	1.20224e-33	6.75261e-28	5.38052e-32	1.27135e-29	2.02432e-35	7.57245e-31	6.81329e-30	4.99265e-33	4.01522e-31	3.08316e-29	1.06178e-24	9.9249e-26	4.91889e-29	5.2212e-34	8.92319e-25
HLS	2.8643e-19	3.56708e-21	2.56251e-18	1.46957e-19	2.02306e-20	4.14631e-20	5.60216e-15	2.44611e-17	2.2446e-17	1.11457e-19	3.29833e-18	6.48322e-17	1.46556e-21	7.439e-17	2.72715e-19	3.24163e-18	2.11178e-21	1.0229e-17	1.12242e-22	6.65259e-17	5.30396e-19	2.2508e-16	3.49166e-23	2.94612e-18	1.58252e-20	2.14009e-13	4.15372e-19	4.54019e-13	8.51298e-20	2.03843e-24	4.23249e-19	7.89641e-16	9.77106e-22	1.59117e-16	6.23654e-21	3.0483e-21	7.46579e-23	3.3481e-16	7.17376e-25	5.34931e-19	3.38166e-22	2.33165e-16	1.43273e-17	4.87039e-19	7.84324e-16	7.6824e-18	8.91402e-18	2.45883e-19	2.49318e-18
HLT	1.96955e-17	2.09331e-16	1.51318e-16	5.56229e-16	2.50291e-16	4.21685e-16	1.25465e-13	5.03917e-13	1.97596e-18	3.45971e-14	4.70595e-15	2.92235e-16	6.48872e-13	1.16656e-15	6.42781e-17	7.85273e-14	3.39757e-15	4.10184e-15	2.27705e-12	1.08077e-12	7.29087e-17	3.02345e-20	6.75553e-15	1.12855e-15	3.59962e-19	4.25389e-15	1.58361e-14	4.50138e-12	4.33197e-15	1.19128e-16	2.24568e-16	2.5053e-18	1.81028e-18	3.17407e-16	5.9988e-14	1.75687e-11	2.62822e-16	7.58534e-15	1.09696e-19	6.27816e-16	2.70281e-17	2.30333e-14	3.25768e-14	4.09047e-16	2.66723e-17	1.06451e-13	1.8897e-16	1.40912e-16	3.61726e-12
HLV	1.16783e-11	1.96029e-07	1.20456e-12	2.27763e-08	2.66202e-10	3.4002e-11	1.51918e-10	2.61887e-10	1.1063e-09	6.25285e-09	2.10305e-07	4.10602e-13	2.43094e-11	2.73886e-15	2.21054e-08	1.3886e-11	6.06191e-12	1.51337e-07	2.27977e-10	1.41331e-11	1.07383e-09	2.82783e-10	1.18757e-09	1.63928e-10	7.12321e-11	6.97903e-08	3.70681e-09	6.25284e-09	1.99531e-07	2.11151e-11	6.92863e-13	3.47658e-08	9.25416e-13	1.5828e-08	3.86071e-09	7.21497e-11	3.46866e-14	2.56275e-12	2.68825e-11	4.01072e-10	2.14087e-06	1.23185e-08	1.13976e-10	8.09905e-12	7.74013e-16	4.73379e-10	6.26149e-08	5.10821e-11	1.73934e-09
HNL	4.57461e-19	6.51908e-22	1.69538e-17	8.24818e-18	2.59235e-24	1.07252e-17	6.8635e-17	7.06611e-21	3.3524e-18	3.15081e-18	6.75233e-24	4.12543e-23	1.42142e-18	8.0041e-16	3.19601e-23	5.48298e-18	1.63474e-18	1.1434e-23	1.3061e-21	3.84177e-21	4.97587e-23	5.66164e-21	7.9977e-19	1.04963e-23	7.12234e-18	6.27757e-20	4.94015e-23	4.58755e-18	7.19444e-21	8.33164e-20	1.16855e-22	2.60484e-20	4.92797e-20	1.20133e-20	1.07042e-21	3.06669e-20	1.50701e-20	3.45859e-20	6.27542e-18	2.68932e-20	9.02885e-18	2.64804e-20	1.46392e-20	4.62998e-23	1.04023e-22	1.30739e-17	2.04274e-21	5.89897e-22	7.8675e-22
HSL	1.37465e-10	5.64581e-12	5.71488e-12	1.83727e-11	1.50309e-09	1.3737e-12	1.24896e-14	2.62807e-14	3.11332e-13	2.1924e-09	1.40616e-09	1.00037e-13	8.35487e-14	1.20885e-12	7.55806e-14	7.13854e-17	6.4297e-13	8.6255e-16	3.91697e-13	4.0804e-13	1.17932e-11	1.05851e-10	5.11029e-12	2.40633e-09	2.05411e-13	8.20738e-15	3.89992e-12	1.23294e-14	3.28234e-10	1.00083e-10	6.86862e-09	1.30625e-10	2.71069e-14	6.65256e-12	1.33364e-11	3.36246e-08	3.14632e-12	1.26378e-10	1.19166e-13	1.09607e-09	9.57541e-10	9.27568e-15	2.11515e-14	4.35307e-10	6.05967e-14	7.15688e-13	6.25783e-10	3.92144e-11	6.29109e-14
hydrophobicity.Group2	1.80578e-57	1.18161e-49	5.05748e-50	5.39734e-54	3.46753e-49	2.62107e-44	9.30385e-51	6.61521e-45	2.27921e-46	8.001e-45	1.04494e-51	1.82606e-48	6.66773e-49	5.09037e-48	3.16574e-53	5.48216e-53	3.35366e-54	4.75841e-54	1.03302e-49	9.07107e-51	3.3118e-43	3.53593e-47	1.31087e-52	1.02922e-46	8.53886e-57	3.58973e-55	4.33245e-48	1.14075e-48	5.9251e-53	1.73942e-49	6.70213e-48	6.79493e-47	7.52174e-57	6.38446e-50	1.87226e-42	2.64659e-52	5.00006e-48	4.38199e-55	4.95453e-50	1.99914e-54	3.06285e-53	3.93501e-51	2.68636e-57	1.09787e-48	3.08523e-50	4.89344e-57	2.33205e-45	8.51372e-56	7.15141e-49
hydrophobicity.Group3	1.7375e-51	1.98211e-44	3.54347e-47	1.44776e-44	3.35444e-38	1.14325e-48	2.81098e-45	9.12835e-44	5.05771e-45	4.85897e-41	1.58236e-41	1.08792e-48	8.67353e-38	1.05531e-43	9.76636e-40	5.82247e-45	2.06681e-56	7.65409e-31	6.44303e-46	2.64105e-40	4.10864e-42	2.81388e-46	9.1573e-42	2.50646e-47	4.50474e-56	2.30403e-46	3.55127e-46	2.10544e-45	5.08491e-47	1.01666e-44	1.41992e-45	2.15029e-44	5.47972e-48	5.21383e-45	1.49529e-44	4.49002e-48	3.18831e-49	4.82658e-53	6.84998e-46	5.63249e-44	5.02314e-55	8.9199e-48	3.02119e-58	2.24506e-39	2.46233e-47	6.4353e-43	2.48145e-50	1.44634e-51	1.75012e-40
I	1.81376e-34	7.75338e-32	3.74628e-41	1.43501e-31	5.08299e-32	7.07523e-37	6.21507e-35	2.14041e-29	7.33477e-29	5.79055e-34	4.86733e-31	5.48289e-35	9.83789e-29	2.03854e-35	2.89152e-36	2.16057e-39	7.17541e-41	9.54174e-30	5.45989e-39	2.78521e-31	2.17249e-26	1.54069e-32	9.59391e-31	3.6401e-36	2.45433e-42	3.44672e-29	1.54793e-34	1.14007e-26	5.34794e-32	1.15789e-31	6.71011e-36	1.20636e-30	8.83583e-36	1.00685e-38	9.93442e-36	3.15842e-37	4.07867e-39	3.98007e-38	1.51228e-35	2.48117e-36	1.1421e-40	1.02994e-44	2.84876e-43	7.2744e-34	5.72488e-29	4.99953e-31	1.87298e-36	2.05946e-41	8.35205e-37
IAC	1.69823e-12	1.46382e-13	1.99258e-09	9.90111e-11	9.9807e-11	2.27619e-11	7.32543e-09	1.03881e-10	9.0099e-10	6.02518e-13	2.14738e-11	1.791e-12	6.1081e-11	2.0782e-09	2.38268e-11	1.01013e-10	7.32433e-10	1.88425e-08	1.45013e-13	3.13188e-11	1.88873e-12	8.70888e-11	5.28834e-15	5.30165e-15	2.46693e-09	6.57705e-12	5.85143e-07	7.8131e-11	9.86154e-11	5.20787e-13	8.58024e-10	1.48238e-09	9.8959e-10	1.83391e-14	1.12314e-07	5.34348e-11	2.8956e-13	3.29034e-14	2.88931e-11	4.60848e-09	2.98035e-11	5.98573e-11	8.13384e-11	7.90742e-12	1.3578e-13	7.75045e-11	6.54276e-11	8.32355e-12	7.908e-11
IAE	3.84044e-16	2.23047e-19	5.08746e-21	9.88173e-21	3.03741e-18	6.74379e-12	5.96872e-20	6.15183e-18	3.01459e-19	8.85156e-12	4.05445e-15	4.14077e-17	9.94338e-21	2.14933e-15	2.08896e-19	1.43927e-15	6.21969e-15	5.86766e-19	6.09977e-18	3.12789e-18	1.00084e-14	1.01046e-19	1.16587e-21	1.63131e-17	1.05858e-14	5.05626e-20	3.59859e-15	8.20038e-20	3.20087e-22	1.12695e-17	1.317e-20	3.21258e-13	4.3622e-15	9.89054e-19	4.17369e-16	6.7665e-13	6.13628e-15	7.40788e-20	9.18906e-20	5.52274e-18	6.7816e-12	5.87732e-17	7.62017e-13	5.03972e-15	2.1273e-14	3.7601e-20	1.0222e-19	1.17439e-15	5.52723e-20
IAI	4.74809e-12	3.09237e-08	4.40922e-12	5.63604e-09	1.80138e-09	9.89472e-13	5.42944e-12	4.77198e-10	1.76448e-13	4.76737e-10	5.82645e-15	1.74783e-12	7.05443e-10	7.89006e-10	1.84572e-11	7.42468e-09	3.05366e-11	1.82229e-07	7.32675e-10	7.59883e-11	5.62662e-09	1.60748e-09	5.75972e-12	1.8039e-14	1.33492e-11	1.19773e-10	1.46804e-10	4.13871e-08	1.03651e-07	8.09663e-12	8.41581e-10	3.44043e-09	1.05407e-14	2.26166e-14	4.06422e-11	2.71245e-11	5.38583e-15	3.56863e-10	6.2777e-08	1.47686e-13	9.39686e-10	2.78254e-10	1.69106e-13	3.15242e-09	5.73464e-14	2.06915e-11	3.79375e-10	2.73261e-14	2.64307e-13
IAK	2.14024e-11	1.48041e-09	2.49242e-09	9.64388e-12	5.78009e-10	7.15656e-09	2.68559e-07	6.90352e-10	3.29215e-09	6.58604e-10	2.00388e-08	8.38168e-10	1.21846e-07	5.97441e-10	1.99531e-07	3.0744e-08	3.38839e-08	3.74374e-08	5.8626e-10	2.58367e-11	1.37341e-10	9.9327e-10	3.49926e-06	1.2546e-08	8.41313e-09	3.37778e-12	2.30871e-10	2.38665e-09	6.88997e-08	6.75175e-10	2.20812e-10	1.03487e-08	2.41287e-12	2.4433e-12	3.14725e-12	3.89942e-11	1.17721e-07	2.05884e-09	1.79335e-12	3.07582e-08	1.99646e-09	2.23641e-09	2.15518e-10	1.19095e-13	1.54485e-12	2.78544e-14	1.00279e-12	7.6315e-10	2.33324e-07
IAN	9.87215e-12	8.62618e-13	1.93391e-10	3.24817e-14	7.29065e-12	3.45812e-08	1.60451e-08	3.9557e-10	2.52138e-11	8.07122e-10	7.7647e-12	8.59262e-13	5.37797e-10	7.42984e-07	8.11736e-12	5.44359e-11	3.29393e-09	4.00733e-12	8.37664e-12	1.76051e-10	7.60811e-12	4.23872e-09	3.31239e-10	3.8065e-10	2.19534e-15	2.93495e-10	1.7309e-09	1.7955e-11	5.12948e-10	2.71418e-12	3.50238e-11	1.17941e-09	1.52951e-13	3.18731e-13	1.08396e-11	1.88672e-09	9.48966e-13	3.74963e-10	3.4254e-10	2.06297e-08	5.44156e-15	1.31517e-10	1.07616e-13	2.34222e-09	7.36405e-10	3.69977e-10	2.37164e-11	1.60866e-13	3.87716e-10
IC	5.99002e-16	4.74021e-15	2.99414e-13	2.11057e-14	8.18565e-09	7.77274e-16	5.28316e-14	5.15789e-10	3.08469e-13	8.89013e-16	2.97475e-07	7.46745e-12	2.63106e-11	2.49015e-11	2.49464e-13	1.11092e-11	1.29326e-09	7.46104e-08	6.47005e-13	1.49561e-15	6.75636e-10	1.18169e-09	2.08197e-12	3.48352e-11	9.18496e-10	1.83e-14	8.66177e-12	2.54903e-11	4.18327e-13	2.32879e-11	9.37406e-09	1.60897e-13	1.17994e-20	6.74703e-12	5.72398e-12	5.55283e-13	1.3542e-18	1.79982e-14	5.84218e-13	8.21209e-12	6.68358e-10	6.34954e-11	1.9719e-10	6.69004e-13	1.05506e-13	1.13477e-11	2.18685e-11	4.638e-15	1.43014e-13
ID	5.93756e-13	1.71333e-11	9.38266e-17	1.50989e-12	2.13184e-12	1.06432e-07	1.87413e-09	1.91396e-12	3.60364e-13	1.6679e-08	3.10567e-09	5.32537e-15	4.63429e-11	2.55164e-12	4.48742e-14	1.00942e-10	1.13685e-08	1.53981e-09	3.02861e-12	1.2706e-12	1.95659e-07	1.10645e-10	1.12017e-07	4.45986e-09	1.62694e-10	3.73224e-11	4.42746e-11	3.14455e-08	3.71185e-12	1.32281e-15	2.51321e-16	2.17289e-09	4.15398e-11	1.90758e-14	2.23996e-10	2.01349e-13	3.07411e-10	4.91373e-11	3.88879e-14	7.68727e-12	2.43377e-11	1.90154e-11	9.16203e-13	2.13666e-14	4.94188e-08	5.52942e-12	1.3749e-08	2.92071e-08	2.13016e-14
IDD	2.03744e-17	1.42531e-16	5.88488e-19	4.3409e-15	3.75908e-16	4.95871e-11	4.74434e-12	8.89554e-13	5.06001e-14	2.4345e-14	1.05879e-18	8.03324e-15	1.8163e-16	1.92064e-14	2.52613e-15	5.02811e-12	1.00038e-11	2.79252e-16	1.20143e-14	4.70767e-16	2.7206e-18	1.87176e-16	1.96774e-13	3.127e-13	5.98015e-18	3.2172e-15	2.7071e-16	6.57815e-12	1.7626e-09	4.81275e-18	4.88499e-11	2.84511e-16	3.36763e-15	2.2012e-14	3.22446e-12	3.95445e-17	9.82664e-15	7.70595e-14	6.66912e-13	3.064e-13	2.41884e-12	2.97471e-14	2.74383e-14	2.59994e-12	4.03056e-09	8.69632e-13	2.18707e-12	1.21795e-14	6.82407e-18
IDL	5.7114e-17	7.63256e-13	4.69584e-12	1.57085e-14	3.61979e-12	4.55702e-13	1.49827e-17	3.12627e-13	2.51183e-10	1.27537e-12	1.84971e-10	1.33178e-13	7.92737e-14	7.96415e-15	5.40166e-15	4.61335e-11	1.38716e-14	2.45846e-11	6.41825e-13	1.98928e-13	7.90658e-12	2.20265e-13	4.37501e-11	3.16621e-13	1.71326e-12	1.49931e-12	4.52982e-12	3.91908e-11	6.52375e-14	8.76532e-14	8.1661e-14	2.83063e-11	1.64876e-11	2.64411e-16	2.71906e-13	1.18182e-13	2.29149e-14	1.16839e-14	5.55137e-19	1.95485e-14	2.42183e-13	5.88708e-11	4.82524e-18	1.37337e-15	2.1635e-14	9.14112e-18	4.66709e-13	2.08437e-16	1.12626e-14
IDR	4.39121e-08	2.82977e-07	3.58925e-12	3.69528e-09	7.29421e-11	1.43982e-08	1.35821e-08	1.17881e-08	1.86528e-09	9.08498e-09	2.09116e-12	9.09928e-07	7.63417e-10	5.33887e-11	8.30007e-10	7.89277e-10	1.93355e-08	9.62376e-11	1.39201e-08	4.09103e-10	4.2053e-07	2.08302e-08	1.22296e-11	3.88475e-09	1.47623e-09	3.61842e-11	1.02011e-06	5.7768e-07	2.88115e-07	3.16967e-12	3.21664e-10	2.26423e-10	3.80032e-10	2.52871e-13	4.54136e-07	2.05885e-08	3.30405e-08	2.06961e-11	1.66786e-15	1.0872e-10	3.70374e-10	8.16131e-10	2.64177e-09	1.39354e-07	1.0241e-08	2.11619e-11	5.61627e-11	1.48922e-08	7.87295e-13
IE	1.77255e-16	1.52887e-11	1.02219e-18	2.17649e-14	1.26395e-15	1.7011e-12	3.77027e-13	1.48096e-11	2.35537e-20	5.7071e-14	2.71471e-15	5.2616e-18	9.74671e-17	2.38748e-21	4.61829e-21	2.67225e-19	1.00109e-17	2.16463e-19	1.15528e-18	4.98789e-15	6.74482e-14	2.62112e-17	8.71083e-16	8.30793e-18	5.55463e-14	3.78351e-24	2.56096e-19	9.01039e-16	7.35544e-16	1.45359e-12	1.36807e-17	3.86234e-15	4.95082e-11	1.97484e-22	5.9163e-16	8.91472e-18	4.85985e-13	2.14616e-22	7.87529e-17	5.17566e-16	1.53045e-18	5.11762e-25	9.86885e-19	1.46855e-16	3.94918e-17	1.84501e-16	9.52722e-18	4.24631e-18	2.83066e-17
IED	8.16127e-12	1.2829e-13	1.13108e-12	1.67324e-12	1.13495e-15	8.27058e-12	9.9383e-14	4.41121e-13	1.5799e-14	4.22612e-12	3.43042e-15	1.30729e-13	7.78081e-17	7.08354e-13	8.41625e-13	1.11195e-16	1.05868e-13	1.17483e-15	9.043e-18	2.61256e-14	5.9021e-18	4.6064e-17	1.42386e-12	1.23923e-11	2.40401e-15	5.23909e-12	7.47196e-14	1.1634e-12	1.52473e-13	3.55344e-08	1.07889e-18	2.64779e-14	1.85382e-14	3.81085e-18	1.86215e-15	1.45901e-12	2.70556e-13	3.45321e-20	3.77402e-15	5.35635e-12	4.04859e-13	6.50733e-14	2.53699e-16	6.26973e-15	7.32774e-13	2.75813e-13	2.05717e-16	4.71225e-15	4.11386e-17
IEE	2.81606e-10	2.90372e-08	2.85497e-10	9.0107e-15	7.43543e-12	8.63278e-14	3.36322e-10	6.92889e-10	2.15659e-13	2.2335e-12	9.32783e-10	2.01463e-12	1.45721e-10	8.95851e-13	3.17168e-13	5.02678e-12	4.44796e-10	1.45188e-13	1.32859e-10	8.86494e-14	9.68106e-12	9.18055e-11	2.67202e-15	4.19156e-11	1.4326e-14	1.79709e-10	2.30165e-13	2.08424e-14	6.07328e-13	3.90577e-11	2.76618e-09	8.18997e-14	5.2909e-11	3.71063e-15	7.44286e-13	4.32847e-15	1.96533e-12	1.98299e-13	8.29186e-12	6.34498e-10	5.07395e-09	2.15827e-13	5.27385e-13	4.26426e-09	1.13129e-09	1.13463e-13	7.62153e-12	1.68372e-11	4.6676e-12
IEL	1.05156e-09	1.02751e-12	9.21082e-12	1.2378e-12	1.97938e-14	1.88396e-09	3.26826e-12	1.21292e-08	2.81849e-19	2.21037e-09	4.1854e-11	1.20644e-16	4.65437e-14	2.93005e-10	1.52189e-17	1.72699e-10	1.87371e-09	1.55796e-15	9.22901e-15	4.27778e-12	4.13674e-10	3.13534e-12	9.94432e-10	4.17743e-14	2.96788e-13	2.935e-15	6.88195e-13	4.10604e-13	3.9229e-14	1.99255e-13	5.58071e-16	6.77184e-10	5.1385e-15	1.04811e-14	1.57277e-12	8.8667e-11	5.42758e-11	2.61145e-13	6.13597e-14	1.42561e-13	3.95139e-13	8.64893e-11	1.15424e-15	1.18202e-11	2.93506e-12	1.80652e-14	4.01578e-10	7.91208e-12	1.63464e-12
IER	3.70503e-12	1.31199e-08	3.27366e-10	4.84442e-12	2.24305e-13	4.89451e-14	1.0837e-13	5.86857e-10	1.19775e-11	6.30883e-13	2.39321e-14	1.47986e-14	6.58091e-12	8.62587e-11	3.35656e-19	8.05025e-12	2.32198e-15	2.18451e-15	3.13929e-15	6.05236e-15	1.8842e-15	1.51109e-15	3.38673e-12	6.60952e-12	8.95284e-12	1.1245e-13	2.70438e-13	7.59502e-12	4.93913e-08	3.04475e-15	3.67379e-12	2.32471e-12	1.22652e-12	2.65806e-12	5.12963e-14	9.94165e-16	9.3297e-17	2.19402e-12	4.69695e-17	1.64066e-13	9.62861e-14	2.92554e-13	9.47556e-16	7.75589e-13	1.5125e-13	1.56468e-09	2.87702e-12	1.98923e-14	2.11507e-13
IES	1.93998e-09	1.06272e-11	4.94032e-13	2.29646e-10	1.67287e-10	8.61015e-12	1.20174e-08	7.9765e-10	4.82863e-12	1.66295e-11	3.26309e-10	2.98583e-12	6.81596e-11	1.01768e-11	9.80249e-10	2.39337e-08	6.11675e-11	1.935e-13	1.92251e-11	1.82123e-09	2.67802e-11	1.25772e-10	2.47746e-09	1.46555e-09	2.198e-07	1.32948e-10	5.29793e-12	4.85479e-15	4.32079e-10	2.42463e-11	3.13527e-11	2.35796e-08	3.24821e-09	6.55403e-12	4.68429e-13	9.98608e-10	1.52125e-08	1.43461e-09	2.47923e-11	3.94233e-09	2.39526e-07	2.50267e-14	1.7755e-08	3.72307e-13	1.77762e-12	4.64403e-10	1.67557e-09	1.08097e-10	9.80518e-14
IFP	1.2953e-18	5.61548e-20	3.0724e-20	3.12241e-20	2.97106e-19	7.80352e-21	1.26436e-19	2.50944e-19	2.29098e-22	1.27964e-17	8.00467e-20	5.35776e-20	4.38402e-19	1.7907e-22	5.27429e-20	1.16769e-19	1.41779e-19	3.78698e-16	1.42297e-18	8.77396e-21	6.57702e-19	1.07384e-24	3.34755e-19	5.05418e-20	1.3571e-19	7.63444e-19	5.83772e-21	4.82465e-19	6.63873e-20	1.64826e-19	9.88619e-20	3.14922e-19	1.93803e-15	2.85403e-21	1.09852e-18	9.8103e-16	2.68999e-20	6.62395e-20	1.22619e-20	6.37817e-16	1.83382e-23	1.24429e-15	2.08347e-18	2.08347e-18	5.88466e-22	3.11824e-22	9.05446e-23	5.23183e-18	7.26472e-20
IG	1.56394e-19	1.13927e-27	5.85215e-28	8.12594e-25	1.81784e-21	3.91456e-20	2.098e-27	7.41597e-19	1.95615e-29	9.94997e-24	1.38208e-23	2.8235e-22	1.95442e-19	1.18254e-29	1.57966e-27	1.37364e-23	1.74758e-26	2.34931e-25	4.52852e-34	1.07028e-28	2.10416e-24	1.92268e-26	2.77439e-27	4.09401e-22	3.0784e-24	6.68384e-21	7.23761e-22	9.51125e-22	1.08876e-25	4.65465e-22	2.43319e-23	2.60437e-27	2.69648e-35	4.55629e-28	7.75705e-29	1.37669e-23	4.63092e-32	3.68834e-34	5.16523e-25	2.17967e-24	3.45181e-25	4.50778e-25	8.64445e-20	1.4357e-20	6.35816e-20	5.44792e-31	1.14666e-22	4.52163e-26	3.92697e-23
IGE	1.55854e-16	4.83643e-22	1.46676e-17	1.51937e-17	1.46462e-19	2.65013e-16	7.61913e-15	1.56377e-15	2.80269e-16	6.59368e-15	4.028e-17	6.45549e-15	7.56007e-18	1.95418e-18	1.76738e-16	7.93829e-16	6.42527e-17	5.03072e-13	6.07494e-22	1.96208e-18	9.22769e-17	2.7256e-18	3.81113e-13	4.17554e-16	3.60881e-17	2.6502e-16	1.13267e-17	8.42699e-18	3.12365e-13	6.34995e-17	2.46214e-18	3.53871e-14	2.1911e-18	2.60783e-20	1.94731e-17	1.19064e-13	6.36844e-19	2.55583e-19	1.06988e-18	3.56039e-17	8.76321e-16	3.86147e-14	3.60131e-13	4.8039e-15	8.6445e-20	4.42182e-16	4.46929e-17	4.25317e-18	1.11497e-17
IGI	2.14244e-10	1.26857e-11	5.00786e-14	1.49641e-11	3.82094e-11	2.69501e-08	3.59952e-10	1.16375e-09	4.904e-10	1.0972e-15	1.59948e-11	1.37674e-09	1.52823e-11	7.00836e-12	2.99659e-11	2.48014e-15	7.8968e-12	3.55544e-11	3.50396e-14	1.59023e-09	5.08614e-09	1.46433e-12	1.03639e-10	1.04488e-09	1.97622e-11	3.04211e-08	2.70248e-12	1.00737e-10	2.9503e-12	5.89089e-10	5.31711e-12	2.16072e-08	3.98298e-15	8.34542e-11	7.08711e-13	7.60553e-10	2.75164e-13	2.04644e-10	4.15526e-11	2.9326e-11	6.30584e-12	1.64931e-11	7.10503e-10	1.14348e-13	7.80333e-11	2.44959e-10	7.47419e-14	8.25352e-11	3.64048e-10
IGK	5.47927e-38	3.07117e-44	9.3105e-43	7.10266e-43	1.11931e-39	3.3622e-46	1.53097e-48	1.7611e-41	6.32153e-51	5.19496e-44	6.85931e-45	2.40067e-46	7.01904e-43	5.33979e-40	2.85691e-51	1.10169e-44	2.75657e-50	7.02806e-46	8.00844e-47	7.87267e-47	3.13351e-51	8.22483e-45	2.09091e-43	1.05624e-42	4.19433e-41	1.85092e-48	7.2509e-48	6.63529e-48	2.25679e-38	7.93414e-43	5.20746e-43	4.1835e-48	8.35904e-47	1.22499e-41	3.91234e-43	6.00344e-42	1.25703e-42	1.1646e-47	2.21328e-40	1.63453e-45	1.36612e-43	3.16961e-49	3.18937e-45	8.20218e-38	7.37811e-46	1.09881e-50	2.41925e-49	1.51072e-45	1.99375e-45
IGN	6.70651e-15	2.3735e-13	3.36513e-13	8.91756e-13	2.63636e-10	1.17266e-09	2.73891e-14	5.15792e-11	2.28606e-15	2.09915e-12	4.26816e-11	5.54294e-15	1.10109e-11	1.47044e-13	2.9595e-15	4.81101e-15	3.52511e-13	5.03981e-16	6.05672e-10	6.89635e-18	1.40644e-08	1.17499e-15	3.66539e-15	5.26293e-12	7.00306e-14	8.50017e-09	1.25311e-14	1.98378e-13	1.84497e-11	7.6831e-14	1.42478e-11	6.06287e-11	4.86618e-13	7.71257e-14	1.77738e-11	2.09838e-11	1.17821e-14	4.13147e-14	2.53345e-15	4.07625e-11	2.13312e-12	6.91727e-12	5.60935e-18	9.17915e-13	1.81063e-12	2.2116e-13	3.26668e-12	8.59788e-16	1.03653e-11
IGR	5.2416e-11	4.99021e-10	2.84873e-08	1.09448e-14	5.5511e-12	1.76769e-11	2.2344e-13	5.48554e-12	2.63355e-14	2.57369e-10	2.22012e-12	2.77765e-13	4.18164e-08	4.89474e-15	6.31166e-13	2.9728e-08	1.99549e-11	9.63301e-13	2.2872e-11	7.37311e-14	2.57285e-13	8.71608e-13	5.75443e-12	1.22277e-09	6.10761e-10	3.1314e-11	1.10948e-13	3.43956e-12	1.95222e-10	2.97376e-12	1.0597e-11	3.77302e-08	4.38352e-17	1.35097e-15	1.3646e-13	7.08305e-12	2.6478e-08	1.00514e-10	9.8839e-11	1.59082e-11	1.97723e-07	3.25424e-12	1.35889e-07	2.13578e-11	3.64711e-14	8.61786e-11	2.81394e-11	1.02101e-12	8.50007e-10
IGS	5.22648e-11	1.35589e-13	1.18277e-15	9.7522e-13	6.48295e-13	1.47957e-16	4.54881e-13	3.01893e-11	2.7457e-11	1.51651e-11	6.61257e-15	2.52745e-11	1.66955e-13	4.93835e-14	1.93277e-13	9.79072e-12	1.10708e-16	5.08495e-16	5.77823e-14	4.74572e-10	7.76764e-15	5.64364e-12	1.71844e-13	8.50346e-13	1.07908e-13	1.13943e-09	2.19943e-16	1.4546e-09	4.33871e-16	2.17535e-13	4.63724e-18	1.83844e-16	1.34632e-13	1.8641e-12	1.3834e-11	5.4051e-14	1.83782e-16	9.94536e-18	2.48995e-13	2.83969e-10	1.30647e-15	1.13707e-16	7.82259e-16	4.22256e-12	1.73579e-12	7.18148e-18	5.41963e-13	4.01802e-13	2.12508e-15
IGY	4.9902e-11	1.54659e-12	1.00422e-11	9.35309e-15	1.36646e-12	5.89427e-12	1.88774e-11	1.42115e-12	1.14942e-09	9.76718e-13	3.9293e-11	4.1757e-11	4.70999e-12	1.34963e-12	3.62007e-14	1.77052e-11	1.04655e-11	1.27898e-12	3.39546e-09	8.6582e-11	1.19128e-11	1.31686e-10	7.80827e-11	5.41012e-13	7.16653e-12	4.6771e-10	4.69112e-12	1.75246e-09	1.27107e-12	6.53546e-11	6.77951e-13	8.98026e-10	1.28332e-11	5.95949e-11	1.56534e-10	1.20306e-10	1.91059e-13	7.99975e-11	2.86876e-10	1.02071e-14	1.56534e-10	1.43457e-11	3.05297e-14	1.4964e-12	4.23172e-13	1.9393e-12	5.7397e-13	6.48499e-09	4.86719e-13
IH	1.80852e-14	5.35429e-15	5.39494e-16	1.02904e-14	1.18862e-18	1.21171e-15	1.24551e-11	1.46815e-13	2.02441e-14	1.05637e-12	3.00831e-20	1.02403e-18	1.52301e-13	2.2217e-11	2.61384e-17	1.00865e-14	2.49937e-16	2.43543e-12	1.00808e-16	4.30492e-13	3.30993e-14	5.33167e-18	7.43506e-21	3.97847e-14	5.58411e-22	4.12002e-16	6.62984e-15	1.30194e-14	2.52181e-10	8.78019e-14	1.89708e-23	1.41426e-11	1.57027e-20	6.15541e-13	9.17964e-18	3.86526e-13	1.54174e-15	5.40665e-13	1.38065e-16	1.09265e-11	8.38361e-15	1.93769e-10	8.2496e-16	1.13476e-13	1.18222e-14	2.12886e-12	1.99985e-12	8.37213e-19	2.4397e-17
IHD	1.2362e-17	1.59558e-15	2.98591e-12	7.73003e-14	3.47731e-16	1.1392e-16	5.3564e-14	2.46895e-12	3.10685e-10	5.59995e-13	1.13097e-12	1.72723e-15	1.78966e-14	5.3222e-13	5.51944e-17	3.83523e-15	7.61241e-16	5.30753e-18	2.49631e-12	2.43084e-14	4.45217e-15	2.02488e-13	5.2582e-14	1.04668e-13	3.92762e-15	2.56569e-16	8.39169e-14	2.36799e-19	8.47375e-14	4.55249e-14	6.68207e-17	3.029e-14	7.51132e-16	7.85354e-16	4.37592e-15	3.98182e-18	1.35034e-16	1.57734e-14	4.05711e-15	1.72343e-15	3.72625e-14	2.15732e-14	4.45217e-15	9.53395e-15	9.21765e-13	2.11594e-13	1.25167e-11	1.26556e-13	7.65147e-14
IHL	1.93126e-12	4.264e-11	2.65964e-14	1.56316e-15	3.93932e-14	4.19257e-13	2.93e-15	6.41516e-13	1.4112e-15	2.00143e-12	7.34589e-11	1.609e-12	1.69705e-13	1.58192e-12	3.014e-14	1.14708e-08	2.96654e-12	1.17441e-14	3.10148e-11	2.61932e-12	1.84873e-14	4.03289e-13	1.30087e-14	2.99419e-12	6.11346e-13	2.95787e-11	4.08015e-13	1.26344e-14	8.51671e-10	3.33186e-15	2.14544e-15	2.87524e-14	7.9917e-16	9.35909e-16	1.48004e-13	1.59577e-11	1.21685e-14	4.69922e-12	8.54175e-14	1.09072e-11	3.78955e-14	2.585e-09	1.39287e-15	5.70335e-13	4.67422e-14	1.23258e-12	9.7489e-15	4.50845e-11	1.98879e-11
II	1.02406e-17	2.92657e-20	7.78409e-20	1.65424e-20	1.77175e-15	9.95543e-22	2.75056e-22	1.18146e-22	7.35007e-15	3.46489e-20	2.87079e-16	4.01154e-19	8.14437e-14	1.67879e-18	8.91552e-25	1.28814e-13	1.56144e-18	5.44427e-18	1.89003e-26	1.19844e-17	8.09689e-12	1.27899e-16	2.84082e-16	5.52724e-22	1.22655e-21	4.97795e-16	2.52431e-16	4.0598e-17	1.743e-18	6.28521e-14	3.59253e-14	5.50846e-22	6.0843e-21	8.72333e-19	1.30346e-21	1.00436e-22	3.52211e-20	1.2436e-24	2.83712e-19	1.74687e-18	6.27803e-21	3.98009e-28	1.98473e-25	1.05937e-20	7.10632e-16	3.84199e-21	1.49991e-19	3.41992e-23	2.09436e-23
IID	2.62841e-16	7.57316e-16	9.77462e-13	1.537e-13	4.35701e-12	5.83699e-14	1.51818e-19	6.11312e-15	1.33596e-16	6.19691e-18	6.6838e-20	3.76391e-14	5.07348e-15	7.62886e-14	9.7068e-16	2.13907e-15	7.86692e-12	4.90679e-14	3.38342e-17	2.32095e-14	1.7476e-14	5.41599e-17	1.26485e-14	8.70527e-16	2.13745e-17	1.63297e-14	1.55896e-14	2.51686e-13	2.51767e-14	1.12434e-11	7.54716e-15	9.2374e-16	3.53209e-12	1.124e-13	5.53017e-14	2.52578e-12	1.75094e-12	4.23225e-12	3.22806e-14	7.15063e-16	4.95269e-15	5.53388e-15	4.1092e-20	9.72464e-18	3.98319e-16	2.29719e-15	2.72311e-14	2.73436e-15	9.81728e-17
IIG	2.19558e-11	3.48235e-13	1.70537e-16	9.10267e-14	1.06268e-12	2.58391e-17	1.9625e-13	1.96088e-14	5.12031e-16	6.70708e-19	1.41501e-14	6.29683e-14	1.13531e-15	5.65066e-18	1.13801e-16	5.95959e-13	1.32883e-12	4.31039e-17	5.78083e-19	4.306e-14	1.79862e-15	5.21307e-13	2.52147e-15	1.5488e-17	3.82443e-17	1.26064e-11	6.71993e-15	3.87327e-18	6.71728e-14	7.00544e-14	6.56634e-12	1.54793e-19	6.62032e-18	5.86246e-16	3.9015e-17	2.05396e-15	8.44202e-17	2.43332e-14	2.68351e-14	4.80165e-18	4.35128e-16	4.35439e-15	1.72318e-13	6.28734e-17	5.89439e-11	4.79783e-16	4.03685e-18	1.71657e-16	1.27223e-18
III	3.85976e-14	2.36922e-12	1.40224e-14	3.38415e-14	1.07706e-10	3.21274e-12	2.17944e-10	8.26716e-13	4.43061e-11	4.27024e-12	1.08733e-11	6.68099e-12	2.48579e-10	1.22474e-09	2.88272e-14	3.30437e-09	1.17999e-12	3.77501e-13	2.43646e-11	2.52342e-13	8.54171e-14	2.3601e-13	6.49201e-14	2.67146e-13	2.24129e-14	1.65345e-11	1.03177e-13	2.34847e-11	4.87679e-13	4.7426e-12	8.71535e-14	1.32415e-13	2.60136e-11	3.20097e-11	7.41884e-09	1.72841e-12	2.19687e-15	7.99245e-14	6.34778e-12	1.73786e-13	5.95495e-12	1.28266e-13	3.7082e-11	2.29501e-12	5.6704e-13	1.33871e-11	5.45429e-14	4.28687e-15	2.34553e-14
IIT	1.05368e-16	4.60411e-18	2.4983e-16	2.7996e-12	1.65189e-17	9.15479e-18	1.54312e-16	4.17551e-20	1.46995e-16	1.42789e-19	9.78785e-13	4.1758e-16	4.53891e-12	2.05935e-20	4.04909e-18	5.02722e-15	4.84316e-15	1.06639e-16	8.45535e-19	1.14343e-21	1.52654e-16	4.25849e-14	9.26944e-19	7.17154e-13	1.41993e-18	1.53415e-15	2.54254e-20	1.40025e-16	1.2906e-18	2.77661e-17	1.71882e-15	4.51096e-15	1.32141e-18	1.18147e-18	1.92245e-21	2.57017e-19	1.8483e-13	4.52379e-16	4.72214e-16	4.00988e-16	5.62937e-18	8.86457e-19	1.2868e-21	2.63405e-15	3.07087e-18	2.88587e-19	8.65262e-20	1.58966e-16	1.96463e-14
IIV	1.14611e-15	2.15729e-17	4.39787e-13	5.03022e-13	1.72452e-14	4.40743e-15	1.88928e-13	3.42585e-16	6.69617e-13	3.05474e-16	3.93168e-13	1.64421e-14	2.64453e-14	1.22682e-15	8.7149e-21	6.56905e-14	1.10639e-15	6.02008e-13	8.99524e-13	6.52038e-14	5.72398e-14	3.42401e-11	6.40904e-15	2.24914e-13	1.03141e-13	1.09165e-11	1.38896e-11	3.42503e-13	3.11697e-11	5.94025e-15	1.54896e-13	8.83805e-13	2.03525e-14	2.18734e-18	2.54093e-13	5.37807e-12	2.03913e-14	5.39189e-13	1.6855e-14	4.04359e-14	2.32569e-17	2.82592e-13	2.49893e-18	6.16655e-14	7.49953e-13	5.62851e-12	4.83776e-17	2.78111e-16	5.0328e-14
IK	1.18703e-17	1.77963e-13	1.54802e-18	3.59489e-16	1.45008e-14	7.02668e-15	7.93128e-12	1.53832e-10	1.09728e-15	1.17328e-17	5.44329e-17	4.06526e-18	5.47996e-11	4.65658e-25	1.5715e-14	1.99871e-12	2.60835e-21	4.13577e-20	2.20029e-24	6.24251e-24	9.08228e-16	3.64337e-16	4.31985e-15	4.96407e-18	1.70309e-19	1.19518e-14	1.76538e-14	4.80105e-16	1.09341e-17	3.47444e-11	1.4542e-15	9.37034e-10	1.21531e-20	2.1626e-18	4.92685e-13	2.32822e-18	1.50956e-10	1.61454e-17	2.76788e-23	4.5076e-16	2.94406e-11	1.80371e-18	8.41271e-18	1.32914e-20	9.75483e-18	1.8726e-19	1.03903e-15	1.55246e-16	5.50002e-20
IKD	3.96381e-08	2.08699e-15	2.49577e-08	1.83236e-11	1.29159e-11	1.05736e-10	8.05209e-10	7.21692e-10	7.79797e-10	1.17911e-11	2.25081e-09	1.21538e-14	5.29354e-11	2.18852e-14	6.07787e-11	3.22729e-09	1.66512e-12	5.0412e-13	4.5085e-14	1.24399e-08	1.89645e-09	4.03552e-13	1.82575e-07	6.2237e-13	7.68979e-12	1.19556e-12	1.17179e-10	4.34798e-11	7.30697e-10	2.60011e-12	9.5945e-10	9.06472e-10	1.33002e-13	2.77323e-14	1.22739e-13	2.92171e-10	4.5494e-10	3.03139e-11	9.71564e-12	1.65078e-07	3.18823e-13	1.88683e-08	7.06194e-10	1.10861e-10	1.10794e-11	1.9469e-13	4.89122e-15	1.28706e-08	9.2719e-12
IKE	6.79051e-21	9.80672e-15	3.87528e-16	4.11176e-18	4.70088e-15	3.84179e-16	8.0731e-17	4.49948e-16	1.72691e-14	3.87372e-17	1.63856e-16	1.10806e-16	3.9907e-13	2.64833e-20	2.83824e-19	5.43258e-20	3.67524e-17	1.25969e-21	4.36797e-21	3.26198e-19	1.24549e-16	2.58007e-16	7.85273e-15	1.18534e-16	1.41556e-21	1.34249e-18	7.43231e-21	3.49437e-19	1.33994e-18	2.58847e-17	6.05722e-18	2.39542e-13	8.39017e-20	1.3351e-17	2.83578e-16	4.69665e-18	4.11677e-17	4.16111e-16	2.4798e-19	3.26576e-17	2.65309e-18	1.74452e-16	1.5932e-17	2.35906e-17	1.26855e-14	1.15541e-18	5.94572e-18	3.32515e-22	5.49779e-19
IKG	1.44493e-17	6.2059e-17	2.74068e-12	5.74931e-16	1.22149e-17	3.75299e-18	5.62875e-16	6.61049e-16	3.67105e-14	1.14164e-16	9.64991e-14	5.3298e-17	3.08966e-17	2.01148e-16	4.84058e-17	1.51975e-11	8.07922e-18	1.0972e-14	2.06407e-15	1.79103e-20	4.46692e-17	6.58664e-13	6.77724e-16	2.74053e-16	7.93649e-15	2.17097e-16	1.1638e-13	5.28179e-16	1.28385e-11	4.82373e-16	2.54125e-18	6.87101e-13	8.33932e-15	2.94074e-15	3.48179e-13	4.72534e-17	2.94138e-14	6.84247e-16	1.20737e-20	1.21515e-16	1.41982e-12	5.44335e-15	4.08907e-14	1.46858e-16	1.55838e-18	4.34299e-17	7.13574e-14	3.55571e-19	8.44271e-14
IKK	4.54292e-12	6.24436e-13	4.37676e-11	1.22752e-14	1.48005e-13	2.35826e-08	2.4658e-11	5.0967e-09	1.92744e-14	4.39444e-12	2.36053e-10	3.87615e-13	3.49524e-14	4.87471e-17	5.56205e-13	1.88037e-11	1.5726e-11	3.10537e-13	3.14647e-14	3.75749e-15	2.78002e-11	3.27664e-17	4.39488e-15	3.24067e-11	1.54651e-14	1.38084e-09	3.64217e-10	1.34296e-15	5.84502e-14	3.79979e-09	4.71795e-15	1.8839e-09	1.6324e-12	9.67119e-11	2.92236e-12	5.73017e-13	1.00179e-10	2.26436e-14	5.98385e-15	2.37098e-14	4.36012e-14	1.23141e-10	1.58833e-14	1.22449e-14	8.74297e-15	5.54915e-16	3.88797e-11	1.89347e-15	9.36232e-15
IKR	1.00324e-10	2.41816e-12	1.60539e-11	1.69601e-11	1.00492e-08	1.76217e-06	2.24654e-07	7.08226e-09	1.03361e-07	7.2468e-08	1.0012e-09	1.86621e-09	6.00009e-08	5.89341e-07	8.19137e-10	9.50327e-09	1.863e-10	4.87496e-09	3.17251e-12	9.04839e-11	3.17528e-08	7.96044e-12	7.19605e-10	7.16238e-09	2.60207e-10	2.73116e-11	6.78995e-08	5.73001e-09	3.62473e-09	7.56285e-13	1.19772e-09	5.91182e-11	1.37321e-11	3.46704e-11	3.25309e-08	8.13125e-11	1.51765e-10	1.00035e-13	5.90065e-08	5.56458e-10	3.03376e-06	4.43775e-09	3.68265e-08	4.9643e-09	1.70472e-09	3.76984e-12	5.193e-12	3.07222e-10	1.27948e-12
IKS	1.41075e-14	8.44719e-12	1.3998e-12	4.81509e-11	2.3236e-15	1.67704e-11	7.13577e-10	4.89296e-09	1.57944e-13	4.71086e-15	7.54656e-13	3.20363e-12	5.46069e-11	1.61035e-17	1.94555e-14	6.02e-12	1.01312e-14	2.80844e-12	7.92291e-13	2.13506e-12	3.54445e-10	4.86346e-14	5.82671e-14	1.24341e-11	1.77771e-14	1.2682e-09	4.50887e-11	3.25317e-12	4.91158e-13	2.39158e-10	2.72921e-10	9.05846e-11	1.60145e-13	8.6214e-11	4.37013e-13	2.02368e-12	1.1239e-14	1.2729e-12	9.02869e-14	1.16527e-12	6.98974e-11	1.25888e-14	1.40811e-10	1.70537e-14	2.02685e-12	5.17528e-10	9.37597e-13	2.11517e-11	1.77396e-11
IL	3.65217e-16	3.89414e-12	7.55869e-20	1.31789e-12	3.15812e-11	5.04015e-20	7.45687e-17	2.03284e-17	2.02055e-13	6.06983e-14	1.07302e-13	2.09865e-21	6.02589e-14	8.3988e-13	2.81252e-13	7.60605e-16	8.17959e-24	1.24718e-15	1.12087e-12	9.42991e-08	3.82732e-17	1.22497e-14	2.74753e-13	6.05659e-18	1.4452e-16	7.82389e-14	2.91023e-15	6.27421e-11	9.09644e-16	1.92017e-12	5.71983e-16	2.06371e-15	1.08615e-16	5.18783e-14	2.82094e-15	7.38814e-16	6.17188e-19	1.02211e-15	5.33269e-15	9.56222e-20	1.45953e-14	1.62634e-20	1.93821e-18	2.99814e-18	2.3754e-12	7.75325e-15	1.61179e-13	2.93874e-17	1.11621e-15
ILD	7.1146e-21	2.93873e-16	8.3945e-22	1.41942e-15	2.50405e-21	2.49588e-18	3.70814e-20	1.78896e-20	7.4773e-20	8.79451e-21	1.98055e-24	1.18486e-25	6.27177e-20	3.05426e-15	8.41533e-19	1.18887e-14	1.01933e-18	5.2278e-21	3.02655e-15	5.95118e-18	3.06846e-17	3.01459e-14	2.54331e-17	2.97742e-20	6.41581e-20	1.71305e-21	2.71747e-17	4.98159e-18	1.14589e-22	1.58875e-19	2.93323e-20	2.31906e-22	1.28799e-19	1.90644e-17	6.15691e-19	1.20397e-19	8.80864e-19	1.46728e-17	1.00971e-23	2.41843e-18	2.1347e-20	2.22183e-20	1.07184e-17	8.71298e-24	7.34993e-18	1.02054e-19	4.58053e-23	1.44226e-14	1.85779e-19
ILE	5.5729e-18	5.38934e-16	2.22033e-15	3.11254e-17	5.39784e-14	2.57643e-14	3.40818e-14	7.00516e-15	3.2558e-16	7.10379e-16	7.13168e-17	1.85923e-14	3.23295e-13	5.80456e-18	5.6801e-16	1.88796e-13	1.96111e-14	3.16145e-18	1.4264e-16	6.85603e-12	6.93768e-14	3.97799e-18	1.57254e-12	7.82801e-16	2.15846e-14	4.73547e-15	2.46114e-12	1.34867e-14	1.78485e-14	1.76491e-13	1.46227e-11	3.99144e-13	3.62248e-18	4.41123e-17	1.04947e-14	1.95121e-14	1.21518e-14	3.49812e-16	5.80779e-18	2.26784e-15	4.14463e-15	1.69909e-16	1.53361e-17	4.44051e-16	1.40714e-12	1.53904e-17	1.42521e-14	8.05509e-19	1.72673e-14
ILG	1.30019e-06	4.22275e-13	4.31284e-09	4.04759e-13	2.48076e-09	5.06725e-10	2.30887e-10	2.67913e-10	9.18267e-11	2.12579e-14	6.49013e-12	6.69727e-12	4.75696e-09	1.56327e-11	1.53982e-09	1.88405e-11	4.79338e-16	3.45505e-14	3.00309e-12	6.30268e-10	1.6505e-10	2.87226e-11	2.84351e-09	9.30655e-10	4.2749e-17	1.9297e-11	1.37244e-11	3.66852e-11	1.11549e-10	1.66679e-15	8.48506e-08	8.64975e-12	1.77667e-12	4.17749e-12	2.62527e-14	3.19873e-10	3.25858e-12	4.8324e-10	3.80494e-13	4.73732e-12	1.92809e-08	1.90255e-09	9.30331e-14	4.94974e-12	2.95403e-11	2.97938e-09	1.35173e-13	6.80519e-15	7.71216e-12
ILK	4.62403e-17	5.76322e-19	2.665e-16	9.26355e-17	3.75206e-19	3.86493e-16	4.5514e-25	4.909e-18	2.72374e-17	2.65864e-17	7.33648e-21	4.39586e-17	6.69528e-18	3.29596e-16	2.75576e-17	2.44435e-16	8.67031e-20	1.02742e-23	5.44733e-22	1.54439e-19	1.95444e-22	1.96495e-26	3.70565e-17	1.64823e-23	5.66849e-17	4.89636e-16	1.43306e-15	2.14323e-21	2.09839e-19	2.05667e-24	8.26741e-22	3.01971e-21	7.4087e-22	7.15725e-19	9.997e-20	1.02541e-17	1.64462e-20	1.233e-16	2.04153e-20	7.92293e-22	2.31314e-19	1.08878e-19	3.91353e-23	5.24254e-18	2.03417e-18	2.26306e-20	3.6305e-18	1.03258e-20	3.5768e-19
ILL	1.46931e-16	1.10251e-14	1.24063e-25	6.27131e-17	2.39448e-17	1.33778e-16	9.29869e-24	3.54222e-21	3.75337e-21	4.49603e-19	5.41722e-19	1.90456e-24	1.93446e-13	4.53565e-19	7.19372e-23	3.6854e-20	2.16921e-21	3.15837e-18	9.03152e-25	1.9902e-19	7.86609e-25	9.18233e-17	1.44402e-18	7.84925e-21	4.04119e-23	9.56015e-21	2.01543e-20	8.01052e-15	2.60902e-18	1.37944e-16	6.6702e-25	5.385e-24	3.46237e-24	6.9324e-20	1.37294e-21	1.56035e-24	2.56017e-27	3.06201e-17	1.44019e-16	3.74784e-21	1.24803e-21	9.92858e-22	7.70447e-24	5.52553e-22	3.89852e-21	4.60217e-22	4.39645e-22	2.73505e-18	3.7961e-16
ILP	7.00872e-17	3.54997e-17	6.10075e-15	3.38401e-18	2.36221e-17	7.04791e-20	8.63389e-16	5.96871e-13	4.34265e-12	1.82495e-14	7.78282e-15	1.15681e-21	1.27257e-15	9.10007e-13	8.15906e-19	6.34414e-12	7.18005e-17	6.45822e-16	2.9606e-12	1.19929e-12	2.68454e-14	9.94824e-18	1.85604e-14	2.88015e-17	4.99906e-16	4.44647e-14	1.27875e-17	8.20601e-14	2.13275e-12	1.59018e-11	1.26016e-11	3.68754e-16	7.37208e-15	1.26683e-15	6.96395e-16	5.80841e-16	4.68606e-17	1.65209e-19	1.83909e-17	2.89359e-15	3.41606e-14	3.7717e-15	1.14302e-20	2.17755e-13	5.32565e-12	4.02203e-14	1.62623e-17	2.27653e-17	3.88736e-12
ILS	5.65049e-14	2.1428e-14	1.84464e-12	6.68686e-11	3.51446e-07	1.75274e-16	2.54673e-16	2.57562e-19	5.56497e-16	5.49533e-13	1.18227e-12	1.3496e-16	1.17252e-18	1.22382e-17	1.7174e-11	3.55257e-16	7.27391e-22	2.86474e-17	2.2605e-13	7.50372e-16	2.5035e-16	3.60448e-21	1.69487e-15	1.73061e-16	1.83178e-19	5.71919e-12	4.47001e-12	5.65047e-14	7.52958e-14	1.30764e-14	5.06728e-16	1.61827e-18	9.84981e-15	6.58047e-13	5.51328e-16	6.29948e-18	2.45224e-15	3.72393e-16	3.79405e-18	5.70541e-13	2.27128e-18	2.98175e-19	2.10927e-14	9.97109e-15	4.68807e-16	1.19519e-12	4.63074e-21	7.25176e-14	4.25663e-13
IN	1.52133e-16	6.68439e-07	2.19131e-12	2.45644e-15	2.9278e-12	1.60492e-10	3.85105e-12	3.24452e-14	1.54048e-10	8.35986e-10	3.88601e-15	8.23612e-15	4.60003e-13	2.6618e-10	3.15123e-10	3.41493e-21	1.67418e-17	1.08189e-14	2.03577e-15	2.26531e-13	1.76226e-09	4.49703e-11	1.37497e-11	2.11964e-13	5.3581e-15	2.78975e-11	2.63436e-14	7.05622e-11	5.50964e-12	1.03222e-11	9.19431e-10	4.97002e-11	1.97949e-13	7.34619e-16	2.82843e-15	3.10835e-14	2.86004e-19	7.28686e-09	1.04463e-17	4.38841e-19	6.37435e-17	1.99934e-24	2.39626e-15	5.94094e-20	3.00748e-13	7.33046e-08	6.1062e-13	1.06707e-14	1.4203e-17
INL	1.71484e-16	1.94936e-14	1.27704e-13	2.24476e-18	1.56204e-15	1.51544e-15	2.66002e-17	9.71111e-19	3.78547e-17	6.07749e-22	2.3088e-17	4.35812e-20	9.0921e-20	4.34552e-19	2.26232e-14	8.43968e-18	1.67882e-17	9.51958e-21	2.70455e-18	3.61894e-18	3.16003e-19	2.69775e-15	5.65357e-16	3.6765e-20	8.04088e-19	1.47928e-14	2.39711e-20	4.19862e-18	4.30687e-17	1.50435e-20	4.22883e-17	8.81173e-13	3.7273e-18	3.71399e-21	1.09621e-15	1.55033e-16	4.61763e-19	8.36482e-17	1.12318e-21	1.48267e-18	8.37138e-17	1.52369e-20	4.26002e-25	7.22644e-21	1.73822e-18	1.72836e-17	2.30163e-19	1.20772e-15	5.3167e-18
IP	2.09304e-10	7.55196e-09	2.38282e-13	1.18149e-09	4.95509e-10	9.69616e-14	6.69087e-15	2.15537e-11	3.79729e-10	1.35902e-13	5.70658e-16	1.47502e-11	9.89724e-07	3.63656e-11	2.68803e-12	3.71411e-10	8.75995e-10	6.03036e-13	2.0519e-10	3.10322e-12	1.07916e-10	3.67857e-10	8.08861e-08	6.38085e-11	2.28013e-14	5.23691e-11	8.47335e-13	6.19222e-10	7.63739e-09	1.08628e-12	2.01429e-10	7.14429e-16	1.18049e-14	2.50093e-11	2.40279e-13	1.37502e-10	5.39466e-12	4.43282e-12	3.01348e-09	1.28455e-09	9.76543e-11	6.05594e-15	5.16954e-14	6.25176e-12	1.93659e-11	8.22366e-12	4.6962e-12	7.67953e-13	1.75669e-11
IPD	5.68623e-12	3.1768e-12	1.0123e-09	1.62319e-10	9.3076e-10	4.27257e-13	6.36786e-09	6.70665e-12	5.6669e-10	2.71215e-09	2.17713e-13	9.96869e-15	2.39478e-13	2.07218e-10	2.35965e-12	2.60295e-08	2.00709e-09	4.51484e-11	3.73224e-12	1.37869e-09	9.01133e-10	6.07897e-13	8.25644e-14	6.85646e-12	5.86894e-13	8.55262e-13	2.01734e-11	1.84311e-14	1.09022e-09	4.59996e-12	5.97126e-12	5.01868e-12	3.54832e-12	4.81821e-12	2.71465e-10	6.04044e-10	1.07207e-10	6.6342e-09	2.25429e-14	5.18742e-10	2.06121e-10	6.0266e-12	6.89775e-15	1.95676e-11	1.86442e-09	6.0627e-16	4.33381e-12	3.02151e-16	3.32042e-13
IPK	1.53943e-10	2.2181e-09	1.05773e-14	4.73294e-12	6.1716e-12	4.50729e-09	1.6392e-08	2.38898e-14	1.12126e-13	7.41465e-13	3.60363e-14	3.64731e-14	9.07958e-16	2.7782e-11	5.15249e-10	3.43241e-08	1.95563e-11	1.81419e-11	7.90087e-11	5.29798e-12	4.85667e-10	2.51245e-11	3.95405e-11	1.63613e-12	2.2147e-09	1.35855e-13	2.1293e-12	1.87063e-10	5.97555e-12	9.96616e-14	4.64303e-14	1.13686e-12	1.47295e-11	3.41275e-15	8.54446e-08	2.2382e-10	8.49874e-09	7.4743e-10	1.5032e-12	2.41386e-10	1.98487e-10	6.96584e-10	1.92692e-10	7.46109e-16	3.3653e-09	1.76837e-11	2.52086e-12	3.12143e-10	2.77518e-11
IPN	2.01656e-09	1.49668e-09	2.96216e-12	5.20873e-09	3.35877e-06	1.97956e-11	1.5081e-11	4.49713e-08	4.8476e-08	2.4319e-11	2.35724e-10	3.30899e-11	1.04196e-07	6.15605e-11	1.6984e-10	2.33753e-11	1.80724e-07	1.56352e-09	2.74124e-08	2.70929e-09	3.69951e-13	4.58203e-09	2.67706e-07	1.08583e-08	1.30163e-08	2.42422e-08	3.17796e-09	1.06039e-08	8.96037e-11	2.53464e-07	1.92955e-07	3.33325e-10	4.18948e-10	1.77729e-08	6.61315e-11	2.18324e-08	2.30067e-08	6.91219e-09	1.93142e-10	1.05537e-08	4.84032e-10	1.09524e-09	1.56696e-10	4.07353e-12	6.88799e-10	5.88044e-09	1.11438e-10	4.4296e-10	1.13546e-11
IPS	5.13908e-16	3.68955e-12	2.66579e-14	1.97658e-15	1.60061e-14	2.73459e-12	2.67888e-15	2.55662e-14	6.05412e-13	3.2023e-13	4.36432e-15	5.34686e-16	7.60344e-16	3.94946e-15	4.1391e-14	6.98994e-11	8.25766e-13	4.38462e-15	1.93549e-12	2.50648e-15	1.38145e-12	4.48616e-13	4.49699e-12	4.00336e-14	9.57375e-14	4.01539e-13	4.91043e-18	3.16605e-12	6.01598e-13	8.69388e-15	1.86789e-10	1.33674e-14	4.16612e-17	2.26451e-11	3.55336e-14	1.14952e-13	4.36097e-12	3.78257e-14	9.07523e-15	1.05447e-08	3.05522e-11	6.05756e-14	3.16551e-16	9.04158e-15	4.19428e-16	3.77791e-15	2.74538e-15	1.29472e-11	9.64108e-13
IQ	1.40236e-08	3.69939e-12	1.32259e-18	5.51498e-12	6.28647e-15	3.95343e-10	3.42606e-11	1.2891e-11	3.30313e-12	8.22238e-11	3.08294e-13	1.1715e-10	6.16067e-14	3.93959e-17	2.18414e-17	7.61293e-15	8.15597e-15	2.15804e-18	5.86361e-16	2.3563e-21	4.35981e-14	4.33906e-15	1.0365e-22	1.18298e-13	1.0539e-17	9.67284e-15	8.49108e-17	3.50212e-10	3.23662e-20	7.13606e-17	2.42483e-19	4.17776e-11	2.75884e-12	5.75451e-18	2.2927e-11	3.02443e-15	1.0663e-21	1.09457e-11	6.29001e-16	1.20597e-15	1.50382e-14	1.40123e-23	2.668e-17	8.84188e-19	3.13223e-14	1.74564e-13	1.93283e-10	3.79334e-26	3.45155e-18
IRD	6.67226e-11	8.52829e-12	3.69719e-09	1.67614e-10	3.58366e-10	1.88971e-09	9.67351e-09	4.43885e-11	7.86605e-09	7.09171e-12	5.42501e-10	8.01162e-10	2.11145e-10	2.38256e-12	1.77586e-09	6.39908e-10	2.18307e-10	1.13887e-11	4.50117e-07	1.49237e-07	3.02295e-06	3.96275e-11	6.44666e-11	3.69784e-12	6.02042e-12	9.0958e-10	6.25824e-09	2.67425e-10	4.85732e-12	7.64141e-11	6.73041e-10	2.72593e-07	1.3913e-07	1.13705e-09	6.67995e-09	4.75753e-11	1.15895e-09	8.42484e-11	3.60339e-12	2.46741e-11	1.80745e-10	1.12235e-10	2.73635e-13	8.79535e-10	7.45345e-13	1.03277e-07	1.80148e-12	2.88399e-08	1.45483e-06
IRS	2.44228e-12	3.15887e-15	3.76701e-11	3.45176e-10	4.61136e-10	7.71996e-10	2.74185e-12	2.96912e-11	1.37174e-10	7.66747e-12	5.57876e-14	3.0066e-15	1.1967e-11	3.15391e-12	2.32256e-12	3.10331e-09	7.4302e-11	2.18494e-13	3.01058e-10	1.47451e-08	1.96669e-12	4.47059e-10	6.51278e-09	1.52122e-14	6.5694e-15	8.50889e-17	2.0291e-16	4.50138e-17	9.11557e-12	2.52568e-13	2.20717e-13	2.64489e-14	7.4658e-15	1.68206e-11	4.56173e-14	9.88554e-07	7.64168e-10	2.02442e-12	1.92403e-14	7.70542e-12	2.25065e-12	2.15804e-15	5.28548e-10	3.30259e-10	2.86338e-11	2.21491e-10	4.13972e-13	3.76977e-10	9.4829e-13
ISE	7.27793e-11	1.41404e-12	3.66136e-11	3.72286e-13	5.5081e-13	1.70305e-15	1.61904e-10	3.07586e-14	1.29791e-15	1.11541e-12	4.8658e-13	1.11826e-13	3.08095e-14	3.27941e-14	7.50835e-15	2.20985e-15	5.05532e-15	1.23209e-15	5.52324e-12	3.11851e-13	4.88471e-15	5.58425e-14	2.51357e-14	7.5e-16	9.04756e-13	1.01036e-12	9.60289e-10	3.99484e-10	1.75687e-14	8.76404e-14	1.40793e-14	1.65344e-11	1.55554e-12	2.35907e-12	1.7693e-13	2.70285e-14	3.26503e-13	8.69304e-14	3.6702e-13	4.57121e-13	2.32341e-15	9.88338e-13	1.57994e-17	1.86913e-12	2.46338e-13	5.16582e-13	3.43882e-11	4.5285e-14	1.02494e-10
ISG	5.82535e-09	5.95923e-13	1.93496e-11	2.5495e-07	8.46808e-10	2.11182e-09	2.32489e-15	1.01511e-12	1.10886e-10	2.3974e-12	1.98111e-10	5.60734e-11	3.73018e-06	1.15588e-16	2.22358e-09	1.11225e-13	3.70863e-11	5.05614e-18	1.42068e-14	3.39613e-09	7.4585e-13	3.90085e-08	2.49301e-12	3.67833e-12	1.42697e-10	5.12121e-12	7.01073e-10	6.66448e-12	9.25916e-09	4.65775e-10	2.04643e-09	8.57988e-17	3.05952e-09	1.92006e-10	2.13709e-07	1.45617e-07	6.94076e-11	3.1822e-12	5.0934e-10	1.51099e-12	3.61171e-12	8.95878e-08	1.16355e-14	6.10436e-11	1.59037e-08	3.6013e-14	2.45939e-11	1.48728e-11	1.04525e-10
ISI	5.51599e-12	4.7274e-10	6.11864e-10	7.19312e-13	4.17817e-10	6.05601e-10	1.07169e-09	2.73731e-09	1.40421e-08	4.27474e-12	1.896e-13	1.55179e-13	2.17133e-09	2.47576e-16	1.0964e-10	4.55137e-12	6.89023e-13	2.37283e-12	2.65272e-10	6.04225e-09	1.7089e-12	1.65732e-12	8.37072e-09	8.1343e-13	9.70376e-11	1.97768e-08	7.66103e-14	1.5816e-07	6.16375e-10	2.19218e-10	3.69224e-10	1.17959e-14	1.48652e-13	4.77963e-11	3.39123e-14	2.8671e-14	2.19186e-12	6.58183e-12	3.3108e-10	1.76289e-09	1.27353e-11	3.6637e-09	1.41013e-10	4.74966e-11	4.40468e-09	2.72233e-12	7.23628e-09	2.51365e-11	9.08103e-14
ISK	1.98391e-17	4.00239e-18	2.96262e-14	2.1574e-16	2.78016e-16	1.20796e-11	3.03029e-14	3.23216e-14	9.71852e-15	1.21279e-14	6.48393e-16	3.69734e-19	3.43117e-16	3.68803e-14	5.7877e-19	3.83783e-14	8.83053e-14	4.4526e-12	3.45028e-21	6.34543e-14	1.06921e-17	6.11763e-13	7.21851e-14	9.36152e-18	1.35792e-16	1.38044e-15	1.46379e-12	1.58932e-12	9.75075e-15	1.33641e-16	1.44992e-14	3.59348e-15	4.6237e-16	4.14426e-15	6.61144e-15	5.69469e-15	7.66381e-14	7.88293e-13	1.37312e-16	3.37385e-13	4.97639e-17	9.97373e-15	2.6141e-14	1.11142e-17	2.00452e-15	9.21634e-14	1.45415e-12	2.24069e-14	1.31604e-12
ISL	1.5546e-16	8.62308e-14	3.64943e-16	6.12319e-11	5.32498e-18	8.17408e-13	4.26594e-16	3.53221e-10	1.40756e-12	4.72852e-14	1.37931e-13	2.73244e-10	1.77588e-16	8.68874e-12	4.24887e-16	3.25404e-10	1.42186e-13	1.98565e-11	7.05105e-18	1.0693e-14	1.86542e-12	3.36926e-14	8.43712e-10	3.26871e-15	1.18588e-15	3.38287e-10	1.80281e-13	1.08821e-12	8.6699e-13	8.79821e-12	6.82037e-15	1.21415e-11	6.83808e-17	1.82122e-12	2.27676e-08	3.92032e-13	1.92086e-10	8.78282e-13	1.93141e-09	1.45726e-11	3.40351e-09	1.75451e-14	1.29754e-14	1.24194e-09	8.63843e-12	5.076e-11	3.43487e-13	4.16295e-17	1.80692e-12
ISN	4.76361e-12	9.12054e-08	4.08113e-14	2.06579e-10	5.85144e-13	9.36998e-17	1.82862e-10	5.48195e-10	2.70484e-12	2.65507e-17	1.58187e-10	9.2396e-12	3.27505e-11	2.16849e-11	7.32788e-17	1.89015e-17	1.52718e-16	8.6336e-17	5.02642e-12	1.09144e-11	1.95423e-11	2.21791e-15	7.61009e-13	5.20563e-13	6.96066e-16	7.3885e-13	6.87968e-18	2.76805e-14	8.29469e-08	1.24536e-11	5.70471e-14	2.9071e-12	5.16481e-16	6.03385e-11	2.91359e-14	1.58814e-13	2.10866e-17	3.4395e-13	1.97228e-10	1.07015e-15	9.64002e-13	1.75741e-11	2.23307e-17	5.83929e-16	1.73321e-13	1.24064e-09	9.04295e-14	1.17546e-13	1.26901e-14
ITT	1.51488e-21	6.29906e-17	8.58412e-16	1.97363e-16	2.53405e-15	6.59202e-20	3.11835e-21	1.11094e-19	8.89089e-19	9.88352e-20	3.22249e-21	9.37459e-15	3.5705e-22	1.79273e-19	3.83063e-17	3.47957e-24	1.35685e-15	1.19743e-17	2.12861e-20	1.92496e-20	9.05148e-22	2.80431e-16	1.1858e-20	4.556e-20	6.7942e-20	1.71864e-16	8.86054e-18	7.81895e-20	8.17744e-21	3.90495e-20	7.77579e-17	3.82636e-18	2.63446e-17	4.05365e-14	2.70374e-20	4.21304e-19	7.79317e-17	3.64099e-16	5.35703e-22	1.28567e-18	5.6223e-22	7.47249e-17	2.95598e-19	5.99684e-24	1.84032e-20	3.292e-19	1.91177e-19	1.2688e-21	1.14051e-17
IV	1.13861e-12	6.8006e-11	8.53623e-16	2.242e-15	8.20302e-11	2.11551e-10	1.57021e-11	4.81517e-11	4.82138e-10	2.50455e-13	2.18895e-11	4.01836e-13	8.86635e-13	3.54719e-12	3.13936e-10	2.04242e-16	1.57269e-11	5.66566e-10	3.02462e-12	2.37548e-07	1.53888e-10	4.30485e-14	1.32896e-10	1.93178e-11	3.42102e-14	2.26982e-09	1.54281e-08	1.23066e-09	2.73393e-14	3.69104e-18	8.29344e-11	7.39033e-11	6.755e-14	4.45629e-11	1.71425e-11	1.52397e-10	2.84274e-08	1.55276e-14	1.53219e-13	7.5989e-10	4.08283e-14	1.1703e-12	2.56364e-11	1.66498e-11	2.86595e-12	1.60846e-11	5.4551e-18	1.53891e-14	7.98495e-14
IVG	5.94137e-27	9.69287e-24	1.25579e-28	1.52683e-26	1.19904e-23	2.75793e-26	1.19232e-25	2.32763e-22	1.15377e-23	6.2342e-25	1.8466e-21	1.3692e-27	7.76407e-24	1.02713e-24	8.31964e-25	4.92941e-25	1.85165e-30	1.24088e-20	9.69859e-28	4.29248e-24	1.80344e-23	2.21928e-27	6.93315e-23	3.69604e-30	2.19039e-22	2.55256e-24	5.90822e-28	2.10948e-22	1.59984e-28	3.01891e-25	1.31262e-27	4.40698e-27	3.76187e-26	3.24126e-26	3.95676e-27	6.62869e-29	3.12441e-23	2.21423e-24	4.11714e-28	7.84501e-24	5.30797e-28	1.037e-27	7.83052e-25	8.55182e-31	8.16271e-27	6.3139e-22	4.21624e-25	4.00652e-29	1.22479e-28
IVI	1.39128e-13	1.07315e-10	2.97249e-08	5.73238e-11	4.09143e-08	1.65569e-12	4.41593e-12	5.76333e-08	7.94984e-09	1.19299e-09	3.45137e-10	2.79091e-10	8.86754e-10	7.08312e-09	9.89646e-11	6.71558e-09	1.32883e-12	5.01722e-10	6.5214e-13	1.64065e-13	2.26421e-11	3.61989e-14	1.4085e-11	1.06437e-11	8.33223e-09	1.22991e-07	1.28222e-06	2.46933e-11	4.9836e-12	4.31119e-11	7.5291e-11	1.45064e-09	3.51584e-10	5.93913e-08	4.69442e-08	6.21497e-09	3.37385e-14	8.58907e-11	2.98449e-10	4.6282e-14	1.51218e-09	1.74384e-11	5.39418e-10	4.61845e-10	9.8125e-07	1.57551e-12	4.55121e-09	2.14888e-08	2.80256e-11
IVL	7.18952e-13	1.29092e-13	1.21827e-12	5.9109e-15	1.02362e-11	3.67453e-13	1.72543e-12	2.77072e-14	2.75608e-12	2.36524e-16	2.79082e-14	1.33385e-15	3.77437e-15	3.83088e-15	3.46351e-13	8.48727e-15	1.53223e-09	1.46034e-14	2.2201e-13	4.95342e-12	1.07609e-10	1.63285e-15	5.17494e-13	3.00348e-13	2.19906e-18	3.3587e-09	3.60375e-14	8.27299e-16	3.50535e-15	3.00843e-17	9.53814e-12	9.10847e-08	3.89793e-14	1.89122e-13	2.28543e-13	1.41285e-15	4.60013e-11	5.78359e-14	3.63808e-10	2.96511e-12	4.01171e-13	1.78295e-11	6.25671e-15	1.28759e-14	3.82588e-10	1.22856e-12	4.36577e-14	1.27792e-13	1.25073e-12
IVV	3.54831e-12	2.98259e-07	1.34659e-10	4.58771e-09	1.02849e-10	2.90786e-07	1.3417e-09	9.31674e-09	1.55553e-07	3.18904e-07	5.19779e-09	5.81263e-09	6.24799e-10	2.98346e-09	4.61854e-08	3.02825e-10	1.89193e-09	4.24224e-08	2.31236e-09	6.80725e-08	6.44707e-09	1.14577e-10	1.63891e-06	2.15406e-11	8.27632e-12	8.71493e-13	1.23438e-08	1.76101e-09	2.35558e-10	1.38106e-10	5.70636e-08	3.27828e-06	1.03497e-11	1.57852e-11	3.19014e-08	2.12443e-10	1.32091e-11	1.46314e-11	1.00194e-10	8.4167e-08	2.15117e-10	5.05809e-11	5.05929e-10	2.38609e-11	5.29276e-11	5.37042e-11	5.47816e-09	2.1154e-07	1.09334e-09
IW	1.32491e-31	3.07631e-25	6.42731e-23	6.32675e-27	5.09841e-27	2.20522e-25	5.0323e-29	2.52002e-26	9.759e-32	1.43071e-28	4.80037e-22	6.45456e-33	1.68935e-23	8.56351e-22	1.86266e-32	8.98012e-25	2.33691e-26	4.04119e-28	1.01947e-25	1.32254e-25	5.12266e-30	1.1126e-25	2.7251e-26	2.17392e-26	1.8124e-30	1.76232e-30	1.07823e-30	7.48575e-30	2.93223e-17	2.09804e-34	4.80715e-33	3.73562e-24	1.61879e-28	4.10966e-28	5.10293e-24	2.1551e-28	3.60945e-36	3.89637e-29	6.67306e-21	2.4915e-30	1.9329e-35	2.04366e-35	1.46872e-26	3.03561e-32	4.48132e-30	5.88162e-27	3.97359e-34	1.5452e-29	6.08058e-27
IWG	3.7808e-13	1.96744e-11	5.8629e-13	4.91908e-13	1.75954e-12	2.45806e-11	4.13434e-13	2.08627e-12	1.39009e-13	1.03793e-13	5.30028e-11	9.32361e-11	3.29407e-13	3.14982e-14	4.63625e-17	2.95721e-14	5.62749e-13	5.9706e-13	7.75045e-11	1.39754e-15	1.37708e-13	2.47342e-11	2.76273e-14	3.22714e-14	2.98607e-14	6.16671e-12	6.98411e-12	3.06686e-14	2.81173e-09	1.10363e-13	7.77329e-12	1.7363e-12	1.0137e-13	1.75176e-12	1.82301e-12	8.34877e-14	1.90712e-14	8.46697e-12	2.95721e-14	1.3578e-13	4.30828e-13	1.70578e-12	2.22417e-12	1.48315e-12	5.56178e-12	1.35143e-13	6.22536e-15	1.42984e-13	1.85965e-11
IWK	2.53463e-09	1.98367e-09	6.3819e-09	7.48927e-09	2.00351e-07	1.6285e-11	5.11889e-11	7.68621e-08	4.66102e-09	1.51309e-07	6.46841e-08	1.60863e-10	7.3735e-09	2.35132e-06	1.63659e-13	7.25947e-09	6.71454e-09	2.00187e-10	4.6854e-11	2.27244e-09	6.35998e-11	2.22259e-10	5.85726e-08	2.11863e-10	8.0382e-13	6.35287e-08	2.29285e-08	6.86145e-10	7.2031e-09	1.65154e-11	5.07635e-08	1.57761e-07	2.46701e-10	5.5222e-10	4.13263e-07	1.45304e-08	2.16528e-10	6.5079e-09	5.34083e-08	5.64097e-09	7.95747e-13	2.0409e-09	2.50917e-09	6.12405e-10	7.40045e-10	2.63903e-09	2.65257e-08	6.63632e-09	2.0285e-09
IY	1.23145e-14	7.90427e-11	1.3955e-20	1.69607e-14	3.58549e-15	9.95838e-14	4.78281e-14	2.28007e-11	1.45298e-11	4.59856e-16	2.1222e-12	3.07012e-18	6.60881e-14	6.39878e-13	1.75933e-18	2.44222e-10	2.87027e-14	2.0568e-16	1.02526e-11	3.40408e-09	9.17008e-13	4.00348e-13	1.39027e-14	1.88046e-14	4.0875e-18	3.66135e-18	2.33998e-16	5.74695e-12	3.32036e-10	4.03028e-17	3.66112e-10	9.63893e-17	1.8907e-15	1.26479e-14	1.91513e-16	5.64345e-10	4.45635e-17	1.12538e-09	8.94895e-16	6.57698e-19	4.583e-18	1.69037e-21	3.98899e-16	4.17827e-13	3.1521e-09	2.34e-09	2.06193e-17	1.20246e-14	1.80887e-14
KAF	3.14553e-07	1.28914e-10	1.1301e-07	3.98239e-11	6.43271e-11	4.43853e-09	4.97036e-07	5.77384e-08	1.71934e-06	2.25717e-11	4.96805e-09	5.17023e-13	6.32722e-08	4.83238e-10	4.30387e-12	1.43625e-07	1.98358e-07	3.4327e-10	3.35288e-11	2.30669e-10	1.57178e-09	2.0788e-12	3.43869e-10	1.97757e-07	5.29881e-08	3.38409e-09	1.23734e-07	1.45778e-09	5.23423e-13	6.20173e-11	1.07712e-09	4.28043e-08	2.92114e-09	1.95153e-09	1.32427e-08	7.31216e-07	5.43546e-09	1.42877e-09	7.22762e-12	7.17738e-09	4.20866e-07	1.07245e-08	1.56921e-10	6.46069e-09	1.24294e-09	3.81238e-08	7.06e-10	1.31575e-09	2.59575e-09
KC	3.33622e-22	3.56211e-16	1.03386e-25	6.14462e-19	4.64426e-17	1.15482e-21	8.48764e-19	5.03711e-26	4.94093e-23	1.0471e-22	2.03552e-24	5.03826e-23	4.07961e-21	1.73629e-24	3.22321e-21	2.08265e-26	3.85194e-22	9.15162e-23	1.06152e-29	5.52511e-20	1.95197e-23	1.25822e-15	1.58871e-22	1.73968e-26	9.13252e-22	2.66777e-17	1.77181e-18	1.23091e-25	2.96737e-23	1.44141e-23	3.87713e-24	1.18955e-20	1.34349e-20	1.00114e-21	6.53162e-25	3.81362e-20	2.34875e-16	8.07979e-21	1.36924e-22	1.2295e-21	1.37328e-18	4.91459e-19	8.61464e-24	1.51144e-17	4.96421e-22	6.566e-19	4.53386e-26	4.85024e-19	1.58324e-20
KCG	2.27702e-07	4.02647e-08	6.59441e-07	1.56176e-08	2.08579e-09	2.23285e-08	7.75073e-10	2.37091e-10	1.88037e-12	8.6218e-11	5.47512e-11	2.577e-09	5.50565e-08	2.88331e-11	6.92074e-10	5.07279e-09	2.03308e-09	2.74118e-09	1.48785e-09	2.02565e-09	3.36345e-10	5.73189e-12	6.86529e-12	2.28935e-09	2.22933e-11	7.68912e-09	1.31813e-12	5.60998e-11	1.9231e-08	2.75115e-09	1.27869e-09	1.0728e-13	6.42479e-11	6.63779e-09	8.44883e-12	1.83127e-10	5.42652e-09	1.27549e-08	3.22711e-14	2.40482e-09	9.77437e-12	1.3961e-07	8.3996e-11	2.75731e-07	4.28378e-09	3.11768e-08	1.77217e-08	1.37253e-11	6.76898e-07
KCL	6.89578e-08	5.64245e-07	1.52172e-10	2.41624e-10	7.9454e-10	1.53299e-08	7.38175e-10	1.2875e-10	8.70319e-11	6.6625e-10	7.38384e-11	5.17379e-10	1.41823e-09	2.3196e-10	1.05859e-12	2.42214e-12	8.28173e-11	3.70387e-11	5.65837e-09	5.31339e-08	9.18052e-11	7.80418e-10	1.221e-09	8.1792e-12	3.34578e-08	1.89114e-08	2.01289e-11	2.1011e-08	2.44294e-11	7.24808e-09	1.20994e-10	1.34295e-09	1.03547e-08	4.78846e-09	1.60933e-08	2.99077e-09	4.93777e-13	2.78645e-10	2.63847e-12	3.19212e-09	6.42209e-08	1.02695e-08	6.02532e-09	1.57304e-09	2.27693e-10	4.99885e-07	2.74459e-09	2.81498e-11	7.29947e-11
KDI	8.45469e-14	6.70773e-15	6.78818e-13	2.29838e-13	3.12344e-13	3.27429e-15	2.26871e-14	2.41513e-13	6.15999e-15	8.77569e-14	5.64838e-14	4.19022e-19	6.76571e-16	3.84877e-13	1.34538e-14	1.33635e-14	1.74428e-13	3.52077e-19	1.65187e-14	1.95248e-13	2.02895e-16	4.85976e-13	1.08109e-14	9.59091e-14	2.46746e-14	1.77174e-14	5.80854e-16	4.77795e-14	3.63431e-14	2.04317e-17	1.57892e-13	1.00611e-16	1.2759e-15	4.45349e-16	3.05439e-19	1.26518e-10	7.68281e-14	1.70005e-14	7.05807e-18	5.99528e-17	3.65011e-14	1.84945e-12	1.26804e-14	1.50701e-12	1.3995e-16	5.57527e-11	9.83659e-15	9.43437e-12	3.79697e-13
KDL	1.03658e-09	1.35733e-09	6.87286e-12	2.92474e-08	1.90611e-10	4.90125e-12	9.41688e-09	7.24597e-09	8.92537e-11	7.45358e-14	6.07907e-10	6.46071e-11	3.25811e-08	2.97805e-10	1.17515e-08	1.36745e-09	5.84004e-11	1.50506e-13	1.47355e-10	1.45553e-08	1.18718e-12	1.1251e-08	1.94349e-11	2.12811e-11	1.57343e-10	8.77141e-11	3.93539e-13	5.86957e-09	2.60957e-10	3.63593e-11	3.67854e-06	3.64131e-07	5.55933e-11	9.94991e-13	6.60472e-13	3.58303e-11	2.02693e-06	1.80975e-11	4.12743e-10	5.89026e-11	2.87522e-09	1.52188e-10	8.75808e-13	3.15314e-07	1.01615e-09	1.65792e-09	6.6191e-12	1.17365e-11	3.31996e-11
KED	2.26344e-12	1.38179e-11	4.25751e-09	5.94029e-13	1.44295e-13	3.34549e-13	9.04788e-11	7.16018e-10	4.22593e-11	5.55071e-12	6.44493e-13	5.44657e-15	1.95106e-13	6.56437e-12	4.4228e-14	1.69019e-09	2.16174e-09	9.56688e-14	2.37156e-09	2.14355e-12	1.07676e-13	2.22314e-14	1.06692e-14	1.19008e-11	8.11469e-12	1.07553e-15	1.06315e-10	1.02616e-09	1.91767e-11	1.61081e-13	4.31202e-12	1.7062e-12	8.27224e-12	9.59555e-11	3.09726e-09	3.31276e-12	8.95696e-12	6.55163e-11	1.12115e-13	2.64726e-13	5.0352e-11	3.10837e-09	8.49824e-14	2.66278e-09	1.68313e-15	4.67748e-11	8.87423e-13	1.54164e-10	3.78884e-15
KEI	1.95843e-24	7.1803e-27	1.7649e-21	7.34387e-34	1.93827e-20	1.27344e-21	1.41417e-18	2.53053e-26	2.61522e-28	3.98508e-20	4.90425e-23	1.57586e-28	7.33286e-24	1.43826e-22	2.09307e-29	2.6576e-24	5.24342e-20	7.02736e-31	6.14137e-25	1.01401e-23	2.05288e-27	4.13482e-23	1.26296e-22	2.33925e-29	1.47989e-26	2.1076e-20	6.00501e-26	5.74347e-25	5.37299e-26	2.93666e-23	1.44507e-24	2.91087e-32	1.25653e-26	2.41193e-25	7.61975e-15	6.72984e-21	6.74534e-28	2.43203e-22	4.39057e-27	7.36231e-24	3.99739e-22	5.07771e-20	6.12117e-23	1.58272e-21	3.3161e-28	1.57561e-23	1.95451e-22	4.32076e-26	9.44633e-24
KEL	5.98243e-33	4.59028e-39	1.13386e-23	4.57126e-34	8.24487e-39	7.26471e-32	5.57302e-40	1.25569e-25	5.70449e-34	1.8368e-40	4.64237e-32	3.49509e-31	5.30426e-36	3.33618e-35	9.76532e-30	1.82855e-30	8.17498e-31	1.20371e-35	5.87921e-31	8.00833e-31	1.25135e-31	9.20725e-33	7.91282e-33	5.70306e-40	7.49448e-39	1.27699e-35	5.38215e-37	1.20165e-41	3.73402e-32	6.71293e-36	1.34469e-37	2.93852e-36	1.25192e-38	1.36451e-32	2.35734e-27	4.37857e-33	5.37659e-29	1.55585e-27	1.8419e-37	8.14345e-34	1.42208e-34	4.45175e-32	2.05485e-28	1.09915e-33	1.07026e-32	6.27221e-36	8.97198e-32	3.53093e-31	8.1779e-32
KEV	1.67975e-09	2.4807e-14	2.18174e-13	2.56635e-11	1.30913e-14	7.8024e-15	2.49849e-11	9.96865e-10	3.2336e-08	2.05426e-11	1.44226e-11	3.06017e-09	5.16554e-12	4.87033e-13	1.07269e-12	8.09003e-11	1.87616e-06	6.05318e-12	1.17238e-12	2.46821e-14	2.067e-10	5.65707e-12	9.4202e-10	3.07804e-13	4.63343e-07	1.31365e-09	8.66555e-17	2.40908e-12	8.23733e-14	7.0385e-13	2.06711e-07	1.16417e-09	2.65225e-13	5.0372e-13	1.14725e-07	3.47787e-08	1.39562e-12	7.32044e-14	5.07649e-15	5.79571e-12	1.97957e-10	8.17672e-08	4.20427e-14	4.79354e-09	4.07764e-11	1.25332e-12	1.48637e-14	6.39663e-12	3.26976e-13
KFL	6.0712e-15	2.61498e-18	1.19807e-17	2.52422e-17	2.83347e-14	2.16453e-19	8.33204e-15	2.36257e-14	4.10952e-11	6.63025e-16	2.98332e-15	2.06598e-13	4.202e-14	3.02939e-16	2.74233e-16	6.44938e-13	1.11733e-18	7.22349e-18	2.36826e-18	3.5334e-16	2.68883e-14	1.87122e-16	1.59075e-17	1.25685e-19	2.025e-15	6.14924e-15	1.15891e-15	1.71525e-14	1.61389e-11	4.61002e-13	7.55819e-12	4.25947e-14	3.08741e-20	8.05883e-12	3.38603e-19	3.07892e-13	4.20847e-19	1.576e-15	3.48322e-19	3.04886e-15	7.18563e-18	5.23406e-17	1.63129e-16	1.45809e-14	5.27695e-16	9.59622e-17	8.82332e-11	6.38888e-14	1.0323e-17
KGL	1.94966e-16	7.20969e-16	5.09403e-15	1.01623e-17	1.60326e-18	5.88533e-15	9.77381e-14	4.73552e-16	4.15445e-15	2.17715e-14	7.6706e-16	1.13335e-17	8.39639e-15	4.53666e-12	3.03952e-18	1.38309e-15	3.04872e-13	1.10881e-14	6.08972e-22	1.49955e-11	7.75126e-16	2.23208e-16	4.71972e-16	9.59619e-15	2.88416e-15	2.20939e-17	8.16954e-13	1.89488e-13	1.78361e-15	1.21608e-17	4.36616e-14	3.64663e-17	1.05656e-20	6.03947e-15	2.04917e-12	5.52269e-14	2.21566e-12	5.24418e-15	8.84824e-16	1.31328e-18	3.17964e-13	3.99629e-10	4.96344e-14	6.48926e-14	2.02241e-19	2.03555e-15	6.63286e-17	1.65334e-16	3.77881e-18
KHL	2.6976e-23	5.30545e-22	1.86524e-19	5.30247e-20	1.27167e-18	1.54326e-20	1.99644e-16	4.58951e-18	8.81382e-21	2.66131e-22	3.16445e-21	3.53125e-22	1.44168e-23	2.12007e-21	2.16243e-20	2.83068e-20	8.38035e-23	4.25266e-18	4.75471e-17	3.30497e-20	4.85876e-18	3.40813e-18	7.59014e-19	5.06009e-19	3.49608e-20	2.85141e-18	1.96527e-15	8.44219e-21	2.57174e-18	2.40835e-23	5.59616e-17	5.18499e-19	1.75113e-18	1.82134e-17	1.66064e-20	3.12592e-22	1.82717e-19	3.74759e-18	1.6739e-18	6.72224e-19	3.19246e-19	1.93673e-23	1.07901e-15	8.86773e-19	1.49479e-21	6.84712e-15	9.24771e-15	4.76187e-19	3.51861e-23
KI	7.55792e-20	1.72817e-15	8.94223e-20	2.19302e-19	8.94482e-21	8.46465e-15	2.45567e-18	1.36172e-21	5.45859e-14	4.33742e-18	2.21738e-17	3.40388e-25	1.53047e-22	7.37782e-24	1.43614e-24	2.38188e-19	2.16913e-24	8.27581e-23	9.95534e-24	1.06585e-25	6.18566e-21	4.80853e-18	1.05949e-19	3.66201e-20	1.54602e-23	5.45487e-19	5.1882e-18	1.01022e-23	1.6365e-21	1.10658e-15	7.90435e-20	1.01371e-14	1.32471e-20	6.8011e-20	1.25534e-11	3.06931e-19	2.72345e-21	4.75281e-17	3.29169e-19	1.12703e-18	1.39863e-21	9.30071e-28	2.97001e-25	1.27853e-16	5.91538e-18	6.12716e-20	5.01137e-19	1.65942e-18	5.20759e-22
KIE	3.87605e-11	1.58649e-12	2.35268e-07	3.5159e-10	4.8341e-09	8.71714e-11	4.59358e-10	1.93253e-10	1.36866e-12	6.03585e-08	1.78263e-08	2.56499e-11	2.2273e-07	7.47679e-12	2.19532e-10	1.13114e-07	3.43944e-09	4.64661e-12	2.22631e-11	1.65574e-11	9.67143e-09	2.18472e-09	2.96195e-10	6.6463e-11	2.01432e-08	3.1427e-11	2.48025e-08	1.68401e-10	3.57239e-12	7.25999e-09	6.41418e-08	3.59999e-09	1.70875e-11	3.13758e-11	3.63001e-11	1.58008e-10	9.09604e-08	1.8404e-09	2.73854e-08	8.61163e-13	4.48241e-09	2.7481e-13	7.32705e-11	2.00614e-08	3.58736e-14	4.66878e-12	1.84427e-10	6.78288e-08	1.31367e-11
KIG	7.2119e-12	1.52288e-11	5.42697e-08	8.94843e-10	4.8937e-08	2.44953e-07	7.07066e-11	1.55132e-09	4.49749e-10	2.23725e-08	5.76948e-13	6.30464e-11	3.77536e-11	1.97073e-10	1.10265e-14	1.43215e-12	3.38425e-11	1.81595e-10	1.10423e-10	8.23085e-10	3.61813e-14	9.56485e-11	1.13015e-10	7.00438e-10	1.24053e-09	3.21485e-09	6.22813e-10	4.26843e-07	9.15725e-15	3.9411e-12	1.114e-09	7.6695e-10	2.07166e-13	8.55744e-07	2.92995e-10	1.26106e-09	6.83977e-10	1.63311e-12	7.41465e-13	2.85731e-09	1.64e-09	2.34639e-10	7.70421e-11	1.95491e-12	8.84639e-13	6.21066e-13	9.13195e-10	2.14896e-12	9.86547e-10
KIH	3.3252e-08	5.24606e-07	9.13724e-09	1.938e-08	8.13006e-11	6.66225e-11	5.00429e-07	1.12294e-08	2.88984e-06	5.29235e-09	6.19907e-11	5.30491e-10	9.14714e-08	1.90729e-11	5.14167e-09	2.38378e-09	1.2944e-12	7.16859e-10	1.92358e-11	5.2828e-09	2.46005e-11	6.898e-10	1.84739e-11	2.10006e-10	3.778e-12	6.53586e-10	2.80793e-07	5.21238e-12	7.16859e-10	2.22972e-09	1.47293e-08	4.32146e-09	7.39248e-10	2.97317e-08	7.04253e-11	1.1754e-08	3.7705e-11	2.15013e-07	3.81276e-08	7.10665e-09	8.07485e-10	1.01042e-08	1.56776e-11	1.88182e-08	1.09373e-09	1.23397e-06	1.25762e-11	3.1646e-09	1.88311e-11
KIK	2.89055e-11	2.49846e-10	1.01277e-12	1.37838e-10	3.81956e-12	6.29909e-11	5.64904e-10	8.45626e-11	6.4782e-09	1.60401e-14	2.91718e-12	1.38916e-10	1.58545e-09	6.83775e-13	3.98372e-12	7.30505e-10	2.82752e-15	1.11235e-13	4.48541e-11	1.34851e-15	3.18402e-11	2.92523e-13	2.26239e-10	4.68693e-14	3.6585e-10	1.46478e-11	1.77352e-12	1.10317e-11	5.9081e-14	6.11043e-09	1.82028e-08	1.81204e-07	7.64254e-14	3.39307e-12	1.82456e-11	1.0081e-10	3.15211e-08	1.97339e-10	1.0405e-12	4.86709e-11	3.52583e-13	8.14196e-09	2.81014e-09	4.02342e-11	1.88159e-10	3.18269e-12	5.36511e-10	3.26854e-14	5.55502e-11
KIL	4.94654e-18	1.88842e-18	6.52382e-21	6.18758e-15	3.24794e-16	4.82519e-22	1.65669e-17	2.04219e-19	8.20156e-20	2.33812e-17	4.13572e-18	6.85958e-19	3.35735e-21	1.36056e-18	6.53678e-18	3.59731e-14	3.86406e-20	1.07303e-19	4.354e-21	5.60017e-20	4.33089e-20	4.60388e-17	8.69432e-16	2.53659e-18	7.28033e-16	5.71511e-16	9.06524e-16	4.13639e-16	3.40771e-18	2.74008e-14	9.39144e-19	3.15548e-17	3.59331e-17	2.26021e-18	1.00235e-14	6.66127e-16	2.48036e-15	7.18146e-17	1.41438e-21	1.27061e-14	1.67447e-18	4.1182e-20	7.07361e-17	1.31027e-15	1.5604e-19	3.90616e-20	7.62537e-25	3.08963e-16	5.90817e-18
KIS	2.62277e-14	2.04319e-08	1.27726e-11	3.16973e-11	4.96858e-12	1.79261e-15	7.39155e-11	1.20849e-14	3.54941e-13	7.35108e-13	1.47158e-09	5.26257e-13	2.33366e-15	3.75376e-16	2.18425e-10	1.8788e-10	1.46679e-13	2.26391e-19	5.63317e-13	1.39189e-13	4.51328e-16	1.10536e-13	6.33438e-10	2.84044e-15	1.59091e-15	4.28576e-10	5.78833e-13	5.32344e-13	2.12846e-10	1.77324e-12	2.26978e-09	5.85495e-15	1.03327e-11	2.49699e-11	1.63465e-12	6.98763e-12	1.24898e-12	3.09705e-10	2.55012e-11	3.18082e-13	3.71293e-13	6.60359e-11	8.08384e-12	2.30727e-14	5.0749e-13	8.92696e-09	1.70972e-08	4.28374e-13	1.45876e-11
KKC	9.95904e-16	2.76724e-13	7.34227e-17	1.18792e-17	5.2779e-15	5.20679e-15	1.84412e-13	2.30505e-12	4.42362e-15	1.61403e-14	6.00483e-19	1.09315e-15	7.62349e-13	6.065e-16	1.79069e-13	1.38248e-14	2.76681e-16	2.14147e-11	3.76322e-14	2.35143e-13	1.20993e-13	2.03695e-16	1.65739e-14	1.41344e-14	4.69205e-15	1.34026e-14	2.45179e-13	4.96233e-13	1.34746e-15	1.66622e-12	5.03311e-15	9.11712e-13	3.71818e-12	7.18055e-16	1.28038e-15	1.25679e-14	3.61915e-14	1.51962e-10	5.97954e-13	5.31832e-14	1.59277e-14	8.8213e-16	1.90068e-12	2.57549e-16	3.94401e-12	1.31088e-14	1.08807e-15	1.59983e-14	2.80515e-11
KKI	7.4211e-11	1.5888e-10	1.0884e-10	1.57249e-11	1.12928e-12	1.14459e-10	2.6545e-12	7.34248e-12	7.21922e-11	8.08854e-13	8.27254e-13	4.791e-13	8.67809e-11	1.04984e-12	5.64104e-14	1.4409e-10	1.9379e-11	1.41096e-15	9.67108e-11	1.12784e-13	1.4729e-09	4.60475e-13	1.66324e-10	5.88112e-14	1.15485e-11	1.02653e-13	9.09552e-12	1.6947e-13	7.12145e-13	4.8113e-09	6.03753e-11	4.29939e-10	2.01331e-10	3.7813e-10	3.62351e-09	9.00411e-12	3.30802e-11	1.60889e-10	2.60514e-10	1.66238e-11	1.21886e-09	1.01678e-11	1.95837e-11	4.19627e-12	1.47922e-10	1.14796e-14	5.81867e-13	1.10604e-12	1.51137e-10
KKL	5.39997e-35	4.45966e-30	1.68729e-33	4.54003e-31	4.48032e-34	3.51254e-28	2.47639e-25	8.30288e-28	5.49309e-32	1.16527e-26	1.12828e-26	2.83987e-35	3.5882e-33	7.58135e-26	1.87448e-34	3.18703e-33	5.46327e-27	2.39641e-29	4.86593e-37	2.09438e-25	1.41585e-29	2.3177e-29	1.0723e-28	2.27629e-26	2.15446e-28	7.60643e-34	1.3156e-26	1.68035e-34	9.07456e-26	4.11708e-33	5.97404e-30	1.08821e-27	2.7622e-30	8.98356e-24	7.6737e-26	5.55787e-34	2.29075e-26	6.34874e-27	3.65807e-31	2.20596e-34	1.42861e-28	1.73195e-28	7.88629e-29	4.18752e-36	1.42806e-32	4.13098e-32	3.21547e-31	1.36569e-29	8.69874e-34
KKV	2.58022e-12	4.84861e-13	5.2878e-12	7.33246e-15	6.34749e-11	1.079e-11	2.45921e-10	6.74593e-10	9.82483e-09	1.35289e-09	1.2005e-11	3.64598e-16	2.22765e-15	1.89603e-11	5.41616e-15	4.29739e-08	1.67245e-13	5.66517e-12	4.49504e-15	1.56048e-10	7.8085e-14	7.78793e-12	1.40286e-15	1.24311e-10	4.08102e-12	1.71079e-09	1.75307e-13	1.53548e-13	9.59769e-12	2.3062e-10	1.70164e-12	4.30333e-12	5.95539e-10	1.71618e-09	2.27611e-14	8.29578e-10	1.16651e-13	6.04483e-09	3.17605e-17	3.89734e-09	1.59933e-10	5.98991e-09	1.17007e-12	6.27276e-17	2.26032e-13	3.21964e-15	2.35006e-14	1.99584e-09	6.20677e-15
KL	1.53237e-55	5.28258e-59	2.93018e-49	2.09765e-54	2.21239e-54	1.23455e-55	1.4886e-50	1.10863e-44	3.35123e-58	5.70333e-55	2.50883e-53	5.93381e-57	2.59346e-51	1.26668e-61	7.46161e-58	5.2903e-54	2.75027e-56	2.33427e-60	2.7823e-60	3.01044e-52	3.06096e-55	3.06319e-52	8.39447e-51	1.5564e-50	2.70665e-55	2.49217e-56	1.07467e-53	4.22303e-56	3.05813e-49	7.65098e-54	1.03368e-48	9.13968e-47	5.1835e-56	4.4314e-55	2.63893e-55	6.40801e-54	2.13291e-49	2.37561e-56	7.62689e-51	4.12259e-61	1.46749e-54	7.59733e-52	7.70533e-52	6.88366e-55	1.63782e-48	3.49819e-55	2.19687e-45	3.6913e-53	6.5827e-54
KLC	1.45143e-12	2.36976e-13	7.86352e-12	2.48923e-09	1.54109e-14	9.14625e-13	1.70049e-10	5.27001e-12	7.85913e-15	2.66741e-10	7.55836e-12	5.31371e-14	4.90122e-12	1.75176e-13	9.14062e-12	1.21965e-11	3.58956e-12	1.13806e-10	1.00586e-11	5.92437e-16	8.1573e-15	4.38259e-14	5.09295e-13	1.40795e-11	1.28225e-12	4.07143e-13	1.42039e-12	2.03941e-09	5.31122e-11	1.2509e-09	2.30484e-12	3.35892e-11	1.5139e-11	7.19216e-13	4.27053e-12	1.05608e-11	7.2468e-14	1.28848e-09	1.98965e-12	1.71149e-14	4.29973e-14	1.55093e-11	2.92024e-15	1.00284e-09	3.94769e-12	7.32252e-13	4.253e-11	1.53373e-11	3.968e-08
KLD	5.05378e-13	1.59945e-10	2.03818e-11	1.33576e-13	2.56562e-13	2.87865e-14	9.77718e-14	1.23874e-12	3.20417e-14	1.27243e-13	1.08067e-10	9.02418e-12	5.31131e-21	6.62497e-16	1.09705e-17	7.52175e-15	2.68497e-14	3.66104e-19	1.05836e-15	5.7637e-13	3.44453e-18	6.51325e-14	7.26016e-13	7.16167e-21	3.38603e-13	6.78252e-13	1.66642e-12	7.29354e-12	2.37671e-12	1.42565e-16	2.55535e-13	3.90586e-11	4.91189e-13	6.18755e-13	1.04823e-11	2.48751e-17	7.09882e-12	1.64258e-16	1.73613e-15	9.42378e-13	5.77324e-13	4.74799e-12	2.45554e-13	4.4274e-10	4.35167e-13	1.49712e-14	1.6028e-11	7.92404e-15	2.76636e-14
KLE	8.08592e-34	4.34415e-29	8.07237e-30	1.62051e-30	4.44476e-33	5.34092e-33	4.56393e-36	1.07587e-31	7.56468e-27	8.97488e-35	2.79551e-36	1.55683e-35	2.61338e-30	1.76836e-41	3.03635e-42	2.75774e-30	7.31089e-33	4.8757e-33	5.35515e-41	8.65257e-28	3.00104e-31	7.52056e-32	5.55884e-30	2.45163e-34	1.64413e-36	1.66387e-29	8.98935e-29	6.27328e-31	1.18136e-25	1.59911e-38	2.83699e-29	4.40946e-34	3.00485e-41	3.61763e-37	1.02478e-31	2.55862e-30	1.6237e-26	2.86861e-35	8.30049e-33	3.9063e-36	5.93565e-36	1.29697e-29	5.7027e-38	8.29531e-39	1.21693e-30	7.58865e-34	1.17627e-33	1.92982e-30	7.82833e-30
KLG	4.59418e-17	5.13709e-23	2.53125e-17	1.49175e-20	2.24703e-16	1.38089e-22	1.16625e-13	6.54827e-20	2.28318e-20	1.66131e-20	6.36422e-22	2.74103e-22	2.93557e-14	8.18068e-22	1.35236e-19	2.6566e-13	5.56919e-17	1.56297e-22	1.44727e-19	2.61371e-22	1.07067e-20	7.38671e-17	6.51997e-17	1.96928e-20	1.8759e-15	2.40715e-20	1.25408e-13	9.76094e-16	1.20764e-18	4.08241e-17	8.35707e-22	1.23079e-18	1.05627e-18	2.58007e-17	1.29303e-21	7.23288e-17	4.82128e-19	9.00831e-20	2.644e-21	3.84114e-17	6.84609e-21	8.08334e-19	5.39573e-16	1.08336e-25	9.23706e-19	1.1276e-19	3.89161e-20	3.01839e-19	1.25363e-18
KLH	1.21146e-12	1.92499e-10	2.14139e-11	1.89537e-15	1.10061e-12	2.50687e-13	3.34018e-17	8.50121e-12	2.25928e-14	8.4761e-20	6.94934e-14	5.02919e-16	8.78872e-15	4.95583e-13	5.40218e-11	2.032e-11	4.97685e-12	9.65364e-15	1.2358e-14	7.78079e-09	5.62997e-14	4.72032e-16	1.12219e-09	3.31953e-10	1.10771e-14	5.60833e-14	2.34193e-14	1.09876e-11	4.23374e-12	6.78217e-15	6.24679e-17	2.7168e-10	6.8442e-13	2.01351e-09	2.09223e-14	1.1413e-15	1.03287e-15	1.55125e-12	3.75474e-13	2.2038e-11	1.36238e-10	8.83515e-13	1.07647e-17	3.79295e-14	4.19415e-10	1.42786e-12	6.94935e-14	6.23444e-13	1.75304e-12
KLI	1.51506e-17	1.0754e-29	2.55472e-23	1.3256e-21	2.3563e-24	2.03069e-20	1.75569e-24	2.30887e-20	2.06789e-22	9.98699e-20	5.09392e-24	7.53087e-22	4.97213e-20	6.13134e-24	8.49218e-25	3.5194e-19	7.0513e-20	7.68964e-23	2.44004e-23	2.28529e-22	5.59219e-19	1.9789e-16	5.53385e-23	3.18344e-22	3.73458e-21	2.79365e-19	1.88263e-17	1.8321e-22	2.93734e-15	3.49139e-28	7.72431e-23	5.95914e-22	7.63873e-23	2.22678e-21	4.39396e-20	5.51211e-19	3.54697e-20	5.32609e-27	2.26076e-17	4.74604e-24	1.12831e-20	5.24988e-21	5.34654e-19	1.6567e-20	1.13169e-17	1.63738e-18	3.6383e-19	3.77182e-25	3.615e-23
KLK	2.72232e-34	1.28241e-39	4.27102e-30	7.13072e-45	1.28086e-40	5.07681e-30	1.96774e-33	2.7006e-33	7.74225e-37	7.60872e-31	1.83412e-25	4.75768e-32	1.4487e-36	3.11532e-42	6.61876e-40	2.65613e-34	6.58533e-41	2.01396e-36	1.0497e-33	2.87722e-37	1.44471e-32	2.99613e-43	1.1676e-39	9.70278e-34	3.99963e-40	2.6219e-36	1.14667e-36	6.70345e-38	1.36886e-33	5.43934e-38	4.06729e-39	6.76302e-35	9.6214e-33	1.07187e-35	1.78751e-40	1.14133e-39	8.10337e-30	5.85354e-35	3.5358e-33	1.86352e-43	4.2637e-37	2.714e-42	3.19e-40	1.23047e-34	5.59693e-29	1.23937e-34	2.27266e-35	1.11603e-40	1.81681e-40
KLL	5.19173e-21	5.67944e-15	1.17423e-16	3.80362e-18	1.01892e-14	1.74037e-17	7.50988e-21	3.2214e-16	4.93118e-21	9.74474e-19	2.00378e-24	4.40297e-13	1.00144e-18	9.13534e-15	2.97587e-17	8.90134e-16	1.06837e-20	9.48721e-16	3.27642e-22	3.30099e-14	6.30542e-19	4.22033e-21	5.02407e-16	2.27355e-17	1.24539e-18	2.41665e-19	5.25586e-17	2.02613e-15	1.70035e-16	5.11196e-20	1.74286e-19	1.55279e-16	2.8518e-22	2.01828e-20	1.2535e-15	3.08577e-14	2.24259e-13	1.80216e-14	1.20142e-23	9.47375e-19	5.60994e-17	1.34169e-17	1.01581e-14	1.90138e-20	9.47385e-17	1.03322e-14	5.4672e-15	4.14888e-19	1.76528e-17
KLN	2.89597e-09	3.20163e-08	3.78174e-09	4.00634e-11	1.98733e-09	7.37355e-11	3.7237e-12	1.44825e-10	1.57164e-10	6.69329e-12	2.00705e-09	8.22871e-10	1.61492e-11	1.34428e-13	2.73703e-13	1.36713e-10	7.89055e-10	6.58455e-12	1.71045e-10	3.95378e-14	7.05713e-10	7.98204e-14	4.26058e-11	6.89612e-12	6.10626e-12	3.82086e-08	7.09822e-10	1.36882e-08	2.63559e-11	1.59e-08	3.63543e-10	9.57357e-09	4.629e-10	2.98192e-13	4.17749e-07	5.16264e-13	4.87601e-13	5.47791e-09	1.10557e-11	7.88839e-13	1.06912e-11	2.02591e-11	1.99078e-13	5.47495e-11	1.30743e-09	3.62055e-12	8.58008e-13	3.17445e-09	7.26496e-10
KLP	2.3089e-25	2.05118e-28	9.82154e-33	2.78779e-28	2.57432e-29	1.77452e-29	9.94631e-33	1.81398e-25	1.2041e-26	3.53023e-26	5.99476e-31	2.96278e-31	3.16432e-32	4.12647e-36	1.01807e-24	8.7827e-29	2.80321e-30	2.33283e-24	3.15915e-29	1.14569e-30	5.33956e-30	4.06325e-29	9.20615e-28	1.741e-27	2.36423e-31	2.21824e-35	1.09878e-26	4.54393e-23	3.97675e-28	1.4258e-30	1.94649e-31	7.03406e-29	3.74647e-34	6.10631e-34	4.79643e-27	1.14963e-26	1.40406e-35	5.62401e-28	2.26701e-27	1.37631e-30	2.86341e-27	5.25128e-29	2.96463e-29	4.72652e-31	4.58233e-26	6.25468e-28	1.09476e-32	1.4024e-26	2.20435e-28
KLQ	6.06735e-19	7.55342e-20	6.17594e-17	1.51604e-24	1.6207e-17	3.06203e-21	2.3892e-19	1.02751e-17	1.03388e-24	1.68108e-23	2.129e-21	3.15882e-20	6.65092e-24	1.39651e-21	1.65711e-20	6.42764e-17	5.15338e-15	1.59506e-21	5.79116e-21	3.74578e-19	3.30179e-19	3.91914e-19	9.12682e-22	4.10859e-20	2.30123e-21	8.08257e-22	1.31288e-21	9.05616e-25	7.45501e-20	1.99029e-19	2.63549e-19	6.75392e-17	4.41572e-20	1.48414e-16	1.48525e-27	4.39671e-29	2.03944e-18	1.31044e-20	6.90683e-20	3.46572e-18	2.28846e-16	2.38068e-16	2.30546e-24	9.60442e-26	9.48293e-20	5.39067e-23	3.77725e-22	9.67348e-23	5.96763e-19
KLR	6.75388e-31	4.59715e-37	1.05479e-32	2.84473e-30	2.41003e-36	6.40445e-33	1.09669e-24	4.76288e-24	4.27194e-30	3.90942e-36	6.12738e-30	3.71976e-34	6.81609e-32	1.69903e-32	1.46657e-32	4.72821e-27	3.83615e-34	1.33449e-40	3.62509e-29	2.07559e-30	3.68131e-33	6.91809e-29	7.6682e-32	2.58668e-30	1.89307e-34	1.46772e-39	2.99101e-37	4.74899e-35	1.9959e-27	3.99501e-28	2.47654e-23	1.30547e-33	2.71374e-34	1.42262e-29	1.29785e-32	1.89817e-22	3.13837e-33	1.65372e-33	8.85018e-30	1.03786e-30	5.65803e-34	1.79149e-34	5.7463e-35	2.36064e-32	7.64748e-36	1.84813e-35	3.43578e-29	3.04807e-35	5.02927e-29
KLS	5.73926e-23	5.48332e-16	3.54727e-20	9.83856e-27	5.64678e-18	1.12063e-22	1.83722e-20	1.13852e-23	4.83491e-26	5.22125e-21	6.71181e-27	6.40308e-29	8.48808e-21	2.54676e-26	3.74221e-19	7.35962e-19	2.31892e-27	5.30603e-17	6.65614e-20	3.29997e-20	1.40922e-21	1.07132e-21	4.14949e-21	1.00874e-24	5.41145e-24	3.18648e-17	6.21311e-18	6.73057e-24	1.64148e-22	3.40605e-26	1.94346e-23	7.64131e-26	1.28519e-26	1.22786e-19	9.34438e-27	7.86608e-22	1.12994e-23	2.36944e-21	2.18259e-23	2.33482e-22	7.60733e-21	2.34034e-20	1.28325e-19	3.34108e-21	4.21543e-22	2.59719e-22	1.15579e-18	2.61201e-20	8.14439e-27
KLT	1.92972e-29	4.33937e-31	7.99651e-26	1.55809e-27	1.89727e-32	1.24226e-24	3.28185e-24	3.99581e-28	3.45701e-30	1.06702e-23	4.90613e-29	1.27511e-38	1.92886e-25	1.79475e-31	1.83141e-26	6.87431e-25	1.6824e-29	7.41124e-34	1.66693e-33	4.70261e-21	1.68835e-23	7.88131e-31	7.17968e-28	2.79715e-24	1.41231e-27	2.82043e-32	1.80996e-34	1.33045e-29	1.44121e-32	8.45496e-36	1.01967e-23	2.8792e-27	1.92275e-24	8.21737e-27	6.15474e-25	1.33553e-30	1.13194e-24	1.6071e-33	1.46778e-29	3.60861e-27	2.56119e-33	1.75601e-23	3.75851e-25	1.13923e-32	1.12371e-33	1.86103e-26	4.48927e-32	1.30388e-27	2.217e-36
KLV	2.76175e-28	1.9461e-23	4.52454e-27	5.84263e-21	1.29638e-19	8.27605e-21	2.88205e-22	4.4379e-15	2.73303e-28	2.7837e-25	1.65551e-25	2.71555e-31	2.94822e-30	3.95415e-19	1.5591e-21	7.45562e-21	3.03059e-22	2.1996e-26	8.98012e-28	4.8331e-22	2.56729e-26	5.65862e-30	1.49916e-27	9.51186e-25	3.39856e-16	7.25495e-22	2.62321e-25	1.49555e-19	2.9398e-18	8.46023e-20	7.76537e-24	4.018e-21	4.67433e-33	1.73634e-21	1.05761e-21	5.88217e-23	8.60839e-26	4.56189e-27	3.7368e-25	2.7494e-22	1.13016e-19	1.45711e-24	3.1617e-24	3.58434e-23	2.65712e-26	2.85575e-22	9.78964e-22	3.68487e-19	3.01032e-26
KLW	4.26703e-17	6.30406e-21	8.60272e-15	6.26936e-17	8.98231e-16	1.90383e-16	1.74245e-16	7.93031e-14	1.39857e-17	1.19479e-17	1.67874e-14	4.07139e-21	3.31861e-14	2.65128e-16	1.45802e-17	3.03555e-18	5.66535e-15	3.02549e-16	3.21316e-18	2.09431e-17	5.93863e-17	3.21316e-18	9.23404e-17	6.52358e-18	1.43268e-12	4.30764e-18	2.32815e-19	6.22564e-18	1.12488e-17	1.8198e-17	1.55759e-13	2.28212e-16	1.19435e-16	9.00744e-15	1.63348e-15	1.86216e-16	4.28645e-17	9.93884e-16	6.46176e-13	1.10966e-16	2.27118e-14	1.97243e-16	5.54885e-15	2.59923e-16	6.21301e-17	2.76953e-19	5.11344e-19	5.27583e-16	2.62165e-14
KM	1.52528e-18	7.48581e-12	3.81106e-14	3.6685e-10	1.96928e-22	3.83746e-13	2.14553e-10	9.56669e-13	3.60507e-14	3.47832e-16	4.50865e-11	1.4876e-17	6.22166e-13	6.38773e-13	6.12804e-15	1.37323e-12	4.81752e-16	7.74671e-17	4.72052e-10	9.2361e-12	3.95735e-16	5.50701e-17	2.17647e-15	1.111e-14	2.37264e-12	2.22486e-13	4.02514e-08	3.27986e-21	5.76112e-16	9.70879e-26	1.31053e-13	8.87987e-08	3.9233e-13	1.16344e-13	3.0729e-12	2.16916e-14	1.53934e-15	8.53665e-18	5.43576e-12	1.35081e-13	3.2639e-16	2.16733e-17	8.03073e-15	3.23346e-12	5.18607e-15	8.49126e-11	7.32915e-16	3.48165e-17	4.30594e-09
KNL	4.83336e-21	2.27452e-25	1.63716e-29	5.65751e-22	2.18281e-31	1.17534e-32	1.5288e-21	4.38602e-24	7.86403e-24	2.43537e-24	2.30465e-26	5.32294e-28	1.29477e-27	1.60854e-28	4.14426e-19	1.26984e-23	3.26974e-19	1.08221e-25	6.53528e-20	3.59336e-30	1.24434e-27	2.76206e-28	8.67051e-26	1.25646e-24	3.53829e-24	1.8354e-33	1.15192e-26	4.85668e-24	2.0277e-24	7.24865e-27	3.55558e-23	2.35416e-21	2.93903e-27	5.97472e-24	2.34713e-27	1.72376e-30	7.17252e-28	6.57392e-25	1.72022e-24	1.41702e-19	1.5203e-26	7.3511e-25	3.96497e-30	2.02357e-24	6.51151e-27	5.03816e-26	1.84163e-20	4.02761e-31	1.1885e-25
KQL	1.98534e-14	2.89964e-16	3.79204e-15	1.12499e-18	1.94755e-14	1.55645e-14	8.59732e-15	1.70958e-12	6.37131e-16	4.97857e-15	5.26715e-17	4.71726e-14	9.52919e-16	7.56916e-15	2.01025e-14	2.82212e-14	3.60284e-18	3.20511e-19	8.69626e-17	3.77299e-18	1.29486e-15	4.61982e-19	2.66489e-16	8.39567e-14	9.87381e-15	2.72428e-17	9.63304e-13	5.31739e-16	1.72632e-17	1.99185e-18	7.72962e-16	1.45053e-15	6.6763e-18	2.71075e-15	1.03891e-17	2.49045e-20	1.32941e-16	7.31148e-12	2.60226e-14	5.43638e-13	2.40868e-17	6.77086e-13	2.35602e-17	2.07493e-14	1.05051e-18	9.54041e-18	6.88231e-15	4.05095e-18	2.26336e-18
KRI	2.57284e-11	2.12621e-12	4.78065e-11	3.34432e-13	1.05641e-12	9.23809e-11	1.2342e-09	2.64958e-11	1.99278e-11	7.44273e-10	4.54611e-10	5.02341e-13	1.08431e-11	4.50949e-08	5.42908e-10	1.11514e-07	3.41848e-11	3.64238e-12	5.69833e-14	1.54382e-12	4.65773e-10	3.00606e-14	4.24469e-10	2.5897e-11	1.94479e-09	8.3756e-11	6.56722e-14	2.96631e-09	1.4213e-08	1.23318e-10	7.17011e-13	7.03318e-08	3.86522e-11	1.96016e-08	1.48048e-12	2.85741e-09	4.94383e-12	1.79964e-12	4.31712e-16	5.50329e-09	1.7896e-08	1.60068e-13	1.4285e-14	6.54484e-15	1.11681e-12	7.51681e-10	1.03338e-13	2.84778e-07	9.31554e-14
KRL	1.06938e-21	1.64666e-26	1.00624e-27	4.12758e-29	2.81952e-27	3.2583e-22	3.43905e-21	2.36991e-26	1.58643e-23	6.00683e-24	8.61328e-29	1.09838e-24	1.95119e-29	1.91227e-19	1.42257e-23	2.30819e-27	1.15883e-22	2.49415e-27	3.99553e-28	1.93141e-20	1.69492e-27	5.21719e-25	9.8982e-27	6.35247e-27	4.23587e-28	1.51136e-32	5.14235e-26	2.45298e-25	5.2314e-21	6.8421e-26	4.41761e-23	1.33971e-25	4.90327e-29	3.17378e-23	6.18937e-23	2.73621e-31	2.17345e-22	4.2458e-24	5.74643e-24	2.73e-26	1.71443e-29	2.1296e-25	5.79546e-27	1.90672e-23	1.71023e-25	1.42818e-28	1.20021e-20	1.92228e-20	5.10417e-32
KRY	4.9434e-14	3.80557e-11	1.04184e-12	5.16929e-11	1.7284e-13	1.97044e-10	3.70722e-10	1.01044e-11	9.50778e-12	2.79672e-14	8.32631e-14	4.99287e-12	5.01159e-16	2.38995e-13	6.57826e-11	9.22261e-12	8.97996e-12	1.47369e-14	7.30692e-12	3.33274e-11	1.66452e-13	8.10566e-16	9.98191e-09	1.99761e-17	7.95622e-16	6.07116e-16	9.84053e-14	4.76603e-12	8.90986e-14	4.50907e-15	6.83537e-14	7.9632e-12	1.99834e-10	4.00964e-12	3.22379e-13	4.39577e-10	7.41582e-13	2.62623e-14	7.98067e-11	2.44068e-12	7.91771e-12	3.411e-12	8.80103e-13	1.94244e-13	1.2778e-12	9.34819e-13	4.74905e-09	1.6038e-12	1.81563e-15
KSF	3.08585e-13	7.12224e-14	8.45491e-12	2.54434e-15	1.90187e-11	9.34258e-11	3.6928e-15	5.99169e-12	3.4097e-09	8.84456e-11	5.60017e-14	2.66542e-11	3.84954e-12	2.98543e-13	2.11131e-12	9.58877e-12	6.09171e-11	2.9474e-11	5.47136e-09	6.79822e-13	6.21494e-11	1.13499e-12	8.06774e-12	6.46106e-09	7.02153e-14	4.91009e-10	3.15647e-13	2.73547e-14	1.15029e-10	6.75186e-13	2.04271e-11	1.16117e-12	1.79585e-11	4.79708e-12	5.95815e-13	2.11236e-13	1.45762e-13	6.72879e-13	3.90021e-11	7.81778e-10	1.60882e-13	2.39042e-14	3.63784e-14	8.24374e-11	4.4042e-13	4.07096e-12	1.76953e-13	4.33615e-13	6.67209e-12
KSI	7.74935e-11	3.73129e-09	8.97374e-12	1.1951e-13	4.60897e-17	5.11307e-14	3.72946e-13	5.63812e-12	4.32799e-10	1.917e-13	1.63415e-15	4.70359e-16	2.17586e-14	3.45945e-14	3.54196e-10	2.47873e-12	9.34774e-11	1.99372e-15	6.30694e-12	1.4874e-10	6.18994e-09	5.66673e-15	4.70748e-14	4.79714e-13	1.14068e-09	1.54661e-09	8.83e-14	5.68365e-11	5.42944e-13	8.10799e-14	4.7044e-11	1.29749e-12	6.38098e-11	4.83305e-10	6.43085e-13	8.50055e-13	2.14061e-13	4.86533e-10	5.64764e-13	3.64152e-15	8.58328e-10	3.46253e-13	1.88418e-10	4.62612e-15	1.02817e-14	1.51084e-13	1.59965e-10	3.39017e-14	2.84463e-11
KSL	1.22043e-36	4.13487e-33	7.04543e-34	3.626e-33	1.29231e-40	9.32283e-27	1.4932e-26	2.80101e-28	1.27624e-34	3.79565e-32	1.20486e-33	1.01316e-29	3.35814e-29	3.56714e-34	4.00116e-30	1.11843e-29	6.74782e-35	1.45025e-34	8.5919e-34	1.49594e-22	1.61535e-29	9.28e-29	7.75153e-34	1.70874e-28	2.97849e-27	1.62153e-33	7.40714e-23	8.98046e-37	1.23717e-29	1.41897e-31	3.54976e-30	6.77986e-27	3.72971e-36	6.57649e-26	2.04175e-35	3.69365e-30	3.17108e-29	1.06662e-32	3.54166e-33	2.68569e-29	6.00217e-29	3.76985e-27	9.73798e-39	5.49833e-40	4.59247e-30	1.3041e-36	1.49579e-32	1.16472e-29	5.5377e-32
KTC	2.62679e-15	8.7789e-14	4.08283e-13	1.16001e-13	1.30757e-11	1.04923e-14	1.05388e-14	1.61662e-12	2.34432e-15	5.59653e-12	3.92682e-13	5.79399e-16	2.23129e-14	2.71172e-15	1.53076e-13	9.14441e-18	4.79697e-14	1.37291e-15	1.47527e-16	1.45474e-12	6.15685e-16	1.14095e-11	7.11029e-13	1.66225e-12	2.56774e-15	9.10438e-16	1.28035e-12	5.89882e-20	1.9028e-13	4.54585e-17	1.17972e-13	1.20312e-11	3.88675e-13	1.703e-15	2.73674e-14	4.45767e-17	4.45767e-17	1.58295e-13	1.40479e-15	2.61487e-15	4.21753e-12	2.9294e-15	7.73715e-16	7.16174e-15	1.7069e-15	4.01642e-13	7.25807e-15	8.16261e-17	1.50023e-14
KTL	4.80785e-18	2.05298e-14	8.7981e-17	3.8468e-15	4.7672e-15	7.51241e-15	2.27809e-15	1.36882e-15	1.38319e-12	3.07765e-19	3.06722e-13	1.80541e-18	1.48182e-19	1.10903e-19	7.34343e-16	8.34607e-17	1.73178e-14	3.07492e-17	3.019e-15	3.2187e-15	1.87819e-14	1.21502e-13	9.90887e-14	4.62993e-18	2.81474e-11	4.87724e-17	8.77746e-13	4.43676e-18	1.42125e-14	4.05905e-16	1.63526e-14	2.53758e-12	2.23122e-19	1.06201e-16	6.84477e-17	1.96224e-16	9.81508e-16	2.3849e-18	3.5715e-18	2.45366e-11	1.61646e-16	3.26406e-09	1.36558e-21	2.65301e-17	2.69985e-14	1.45201e-14	4.4015e-16	7.74842e-12	1.55556e-17
KTT	6.81835e-50	1.59056e-55	4.94242e-51	8.02392e-60	1.20325e-45	3.97482e-47	2.67061e-50	1.17791e-54	2.05288e-47	4.4628e-51	1.88318e-60	1.10805e-53	6.45634e-60	2.46262e-57	3.2209e-45	5.99195e-58	7.08275e-57	7.29802e-55	5.27979e-47	3.9892e-50	1.34158e-57	8.79639e-47	3.16434e-48	2.85439e-52	1.28605e-58	1.5639e-48	1.23454e-45	1.36834e-53	8.74462e-62	3.71801e-50	3.51917e-59	6.36221e-49	2.07823e-62	7.35067e-49	1.48498e-45	4.6513e-61	7.3426e-55	4.52364e-45	7.31311e-52	1.94032e-51	3.09224e-48	1.0952e-59	9.03128e-59	1.68464e-48	1.26596e-52	3.23243e-48	4.82954e-48	1.3249e-58	1.6406e-54
KVF	1.86294e-10	1.36543e-11	1.31988e-12	4.38524e-14	5.35052e-13	2.81571e-10	1.34175e-12	1.11292e-11	5.25415e-13	1.8765e-12	2.01828e-13	5.84288e-15	1.3275e-12	5.90697e-11	7.65694e-14	4.74439e-14	1.48331e-14	1.38788e-12	3.57485e-12	2.07381e-16	3.14945e-11	6.26355e-12	2.6915e-09	2.1564e-12	1.23833e-11	2.30173e-11	1.06218e-12	1.05298e-11	2.75921e-10	5.92282e-13	4.20467e-15	1.81307e-11	6.31024e-14	1.29286e-13	2.59851e-13	7.80351e-13	2.79036e-12	1.63414e-13	2.42697e-10	7.62695e-12	1.99862e-10	1.62944e-12	1.26606e-14	8.23435e-15	5.31048e-15	2.95044e-10	3.12044e-10	6.73152e-12	1.42357e-08
KVK	2.04978e-10	2.13931e-09	1.28091e-10	9.70554e-10	2.66481e-13	4.79467e-12	5.00145e-06	2.1748e-09	3.90986e-07	1.75361e-17	2.31373e-08	1.30407e-11	4.07191e-13	7.64899e-13	7.84726e-08	3.67806e-13	1.60568e-11	3.0491e-13	7.96405e-11	8.12911e-12	2.97305e-09	1.94406e-11	7.69442e-11	6.5381e-12	8.24805e-11	4.49029e-07	3.66061e-11	5.57665e-13	1.21604e-08	1.68851e-12	1.65741e-08	3.15336e-07	1.77129e-10	3.86447e-11	4.18904e-13	1.11976e-07	9.21081e-12	1.44278e-08	1.36934e-12	1.90314e-12	2.68262e-10	4.2609e-06	2.40654e-11	5.97303e-15	1.52149e-11	2.25635e-11	1.36799e-11	4.90784e-08	3.13012e-15
KVL	1.82305e-22	6.0982e-22	7.7001e-25	1.81171e-28	4.67005e-26	5.97481e-26	7.29085e-20	7.46707e-25	6.22178e-13	1.6166e-20	2.99407e-28	3.79213e-25	6.13874e-26	7.32122e-25	3.90732e-26	4.3905e-14	1.84457e-22	1.01032e-23	4.94496e-16	1.0002e-24	2.75351e-18	1.06437e-22	2.4535e-26	5.70615e-25	6.94085e-23	6.14627e-27	2.46775e-19	3.22704e-21	1.87758e-20	1.23095e-22	2.27036e-22	5.43304e-25	1.13899e-18	7.64439e-16	1.06984e-21	5.29727e-28	4.98187e-23	4.90529e-27	9.01819e-19	1.66167e-18	2.87668e-23	2.09578e-21	1.45187e-28	2.75491e-24	1.46858e-21	3.98819e-26	5.70552e-24	2.06779e-18	8.69277e-25
KYL	2.46049e-17	1.15023e-19	1.78507e-19	9.41265e-25	3.0213e-15	6.02769e-19	2.97757e-17	4.26713e-18	1.15259e-19	6.94977e-19	2.1787e-20	4.84843e-14	9.09542e-24	3.15319e-21	6.30418e-21	1.35644e-15	2.1787e-20	1.59234e-21	2.92283e-18	1.93711e-20	1.07001e-18	7.14361e-25	9.39484e-17	1.04973e-16	1.57688e-22	4.12986e-19	4.74546e-21	8.65503e-20	1.15347e-18	1.48053e-22	5.28816e-17	7.34486e-20	2.28249e-21	6.96883e-19	1.24382e-18	3.97915e-18	4.24295e-20	1.63637e-16	3.86111e-23	1.50739e-18	6.26877e-17	1.73659e-20	7.48832e-17	2.49472e-19	1.80722e-23	1.94527e-20	6.48916e-23	1.38027e-17	2.29115e-21
L	3.38072e-80	4.48029e-77	1.27115e-71	2.81473e-74	3.77265e-70	2.11503e-77	1.06636e-69	3.49767e-73	1.38257e-79	1.75833e-75	2.32494e-70	7.30504e-76	1.78746e-62	3.43993e-73	5.28945e-75	1.4097e-72	1.15446e-83	2.40641e-74	3.61388e-72	1.27328e-70	8.55241e-75	3.71772e-73	6.8144e-67	1.75849e-75	4.14824e-77	9.62285e-75	5.21666e-76	6.37797e-76	2.78423e-75	2.26066e-76	7.80892e-77	2.3794e-74	4.19582e-84	5.20136e-73	7.21513e-72	1.17448e-72	1.82206e-76	1.57104e-77	3.85487e-73	3.06114e-74	1.06357e-78	1.32645e-70	4.47656e-81	9.51643e-73	4.5189e-77	2.93723e-75	3.56643e-77	8.05476e-72	1.13872e-74
LAI	5.46511e-16	1.79027e-15	2.03375e-18	4.48051e-17	8.29291e-18	7.15844e-16	1.04606e-23	3.2648e-12	1.03999e-19	3.59512e-22	7.78539e-19	1.19527e-18	7.2584e-18	3.57339e-20	9.03605e-16	2.60673e-18	4.60272e-20	9.49845e-11	1.3693e-15	5.59227e-16	1.56904e-18	2.82372e-10	9.89388e-14	5.25553e-17	1.1214e-17	2.97847e-17	1.5121e-17	1.85472e-17	3.22581e-21	8.97903e-16	1.131e-19	1.84962e-15	7.21476e-17	6.99222e-18	1.30798e-15	4.77873e-19	2.95445e-14	3.04532e-18	1.22187e-15	7.61117e-18	1.76827e-20	4.28916e-16	7.86288e-18	3.89205e-16	3.26414e-18	1.62474e-12	1.58307e-20	8.3795e-20	3.18924e-19
LAK	1.003e-14	1.7811e-14	1.39836e-14	3.93737e-13	9.48466e-16	6.57196e-15	5.76498e-12	8.18088e-13	3.72785e-09	4.66555e-13	5.31804e-16	1.45642e-18	7.61143e-16	2.08593e-09	2.14955e-14	1.16309e-12	1.90919e-08	5.43058e-15	1.49068e-16	1.60896e-11	2.47273e-12	2.62476e-15	2.20649e-13	1.89642e-17	2.32684e-14	9.73064e-14	1.9165e-15	5.24491e-17	1.03227e-09	5.80645e-18	6.02129e-16	2.18336e-14	1.59581e-17	4.07073e-10	4.40486e-10	2.61704e-14	1.23995e-12	2.33926e-16	1.49447e-14	2.00645e-11	5.29668e-15	3.58429e-11	2.53734e-12	9.29403e-18	9.60736e-15	3.74579e-12	1.04119e-12	7.80812e-11	4.5529e-15
LAN	4.89791e-13	1.7869e-16	2.34145e-08	1.62763e-12	5.87935e-12	2.79095e-13	7.16227e-12	5.35493e-12	4.82493e-13	1.0127e-09	6.69545e-13	2.98904e-11	9.82397e-08	2.39552e-13	1.03268e-11	1.44225e-09	3.25064e-10	2.73992e-08	4.00145e-13	7.52242e-09	6.85089e-10	7.90257e-10	2.02495e-08	3.23193e-12	1.43625e-13	6.71496e-12	3.65525e-12	5.5978e-09	7.50702e-09	2.75392e-17	4.74029e-16	3.32429e-16	6.4022e-13	3.23828e-13	1.93333e-12	3.88829e-09	3.7347e-09	9.19959e-12	1.60766e-11	1.02141e-08	5.03505e-14	8.50002e-14	2.44023e-11	1.15421e-11	1.35956e-10	1.06794e-11	5.04901e-11	6.03007e-12	1.58323e-12
LAQ	2.09298e-11	4.7721e-11	2.41316e-12	1.04193e-11	5.92225e-12	2.67877e-13	2.79655e-11	6.13119e-12	2.47388e-13	1.68274e-09	2.20641e-08	3.09976e-10	3.11211e-15	1.59783e-09	5.9548e-11	1.96849e-11	3.5105e-12	3.54223e-14	1.22053e-15	1.35539e-09	2.07086e-10	8.20443e-12	9.93455e-11	9.12364e-12	1.17548e-12	2.5211e-10	2.41378e-11	5.88431e-13	2.82279e-11	1.28554e-13	1.23326e-12	4.1194e-12	1.3765e-11	3.29655e-08	3.41068e-09	4.19607e-09	2.20988e-10	1.04937e-12	9.41724e-10	2.30471e-09	3.92012e-09	5.47929e-10	6.68601e-09	6.16162e-12	9.45592e-11	2.26391e-10	4.18099e-11	1.39102e-09	1.82324e-13
LCL	1.38808e-12	8.40782e-10	1.68727e-10	8.38768e-16	2.76021e-13	1.8285e-12	3.64624e-13	1.4287e-12	1.13885e-12	1.12082e-11	1.0079e-12	1.67364e-12	2.18195e-15	7.85978e-10	7.28874e-17	1.1092e-10	3.47993e-11	3.79574e-10	2.30216e-11	2.96367e-08	2.35868e-13	2.39432e-10	5.84948e-08	5.8471e-14	1.64549e-11	4.62191e-11	9.27964e-14	4.73553e-11	8.34398e-08	2.68826e-12	8.45844e-09	4.32352e-10	1.81906e-15	1.77885e-11	1.11328e-09	2.34945e-09	4.08456e-14	3.17061e-15	3.48449e-10	8.30247e-13	2.2483e-11	5.34437e-12	9.84186e-16	1.26023e-09	1.77337e-11	1.54135e-11	1.22355e-12	9.18454e-08	5.89643e-09
LD	3.32642e-42	4.30712e-28	7.43695e-38	9.33563e-34	8.29435e-41	5.07868e-38	7.72208e-31	7.55339e-36	3.27046e-40	2.80886e-35	8.42651e-38	2.23387e-33	5.74556e-40	1.80476e-31	1.43064e-41	6.25242e-35	9.26584e-44	7.78242e-40	9.72903e-32	3.09826e-34	4.95955e-33	5.47804e-36	6.92233e-31	8.01116e-31	1.09653e-35	1.57895e-37	4.02586e-37	1.28968e-32	3.27238e-37	1.00168e-44	1.46025e-36	5.75066e-38	2.69449e-39	5.5438e-40	1.43458e-34	7.93748e-34	1.33402e-31	5.34151e-34	1.52642e-39	1.83386e-30	2.09161e-36	1.95494e-33	7.39839e-38	9.79446e-33	4.51917e-37	6.56294e-32	4.76116e-40	7.41866e-28	4.77707e-40
LDD	4.09507e-43	6.18089e-45	2.48169e-40	2.30899e-34	6.21754e-46	2.19734e-34	1.73531e-32	5.32674e-41	7.63372e-45	1.21511e-40	1.3953e-37	7.52901e-40	4.22167e-48	1.33879e-46	3.68931e-47	2.40726e-39	4.02008e-49	5.86478e-47	8.5583e-38	8.89274e-39	1.92153e-45	9.05577e-35	2.10913e-40	9.98289e-45	4.93106e-33	1.49601e-37	2.68743e-45	2.28632e-31	5.60631e-42	8.69516e-41	9.81012e-45	1.74724e-46	3.47755e-43	5.0047e-47	1.47944e-38	2.66795e-42	3.60877e-30	4.98606e-34	6.01101e-41	1.9385e-32	1.02654e-43	2.32321e-42	2.22878e-37	4.19195e-40	2.55091e-46	1.57004e-35	7.75596e-48	6.68776e-49	7.3364e-41
LDE	1.23357e-19	1.43956e-17	1.63482e-20	9.15999e-16	1.51339e-21	8.76895e-16	4.90134e-16	4.37271e-15	4.91021e-21	1.38858e-18	7.50293e-22	3.13468e-16	2.4602e-24	4.61575e-16	9.95536e-23	9.31687e-14	8.88368e-23	1.23376e-19	1.1112e-22	3.271e-16	3.90966e-14	9.75777e-22	1.58706e-15	6.93583e-21	8.27741e-22	2.31458e-22	1.54072e-20	1.87725e-18	9.34809e-14	8.00746e-21	9.01215e-20	2.86655e-21	3.05569e-21	2.07822e-16	1.52426e-17	4.9783e-15	6.88943e-20	7.08147e-19	4.00498e-21	1.95309e-16	3.84831e-19	1.73784e-20	4.14265e-17	3.61098e-15	8.62217e-15	2.40965e-18	1.46834e-17	1.73663e-16	1.63361e-21
LDG	6.34901e-12	7.0699e-13	1.51854e-09	3.47524e-13	4.58405e-15	3.63799e-14	5.72511e-15	1.10339e-13	2.02315e-17	5.20947e-13	8.69149e-13	1.96236e-10	1.53822e-23	1.17775e-09	2.27376e-13	1.37917e-13	2.28939e-15	1.50806e-19	2.30573e-12	1.19283e-13	4.49378e-21	6.20562e-17	2.36291e-15	4.64346e-15	4.70597e-13	3.48275e-10	2.23894e-13	3.56496e-12	2.17598e-12	6.59518e-17	5.21451e-12	3.91583e-13	1.07405e-17	3.95105e-12	5.87474e-12	1.25796e-11	5.1606e-18	2.61667e-13	3.58466e-15	1.41514e-16	1.90414e-12	2.9972e-13	2.38995e-16	2.42543e-15	8.24129e-13	8.28735e-12	9.59029e-15	1.69899e-14	7.58428e-12
LDI	4.38082e-26	2.24803e-29	8.82856e-29	1.27217e-33	2.55069e-31	2.75568e-25	1.53162e-27	1.02608e-25	5.77086e-33	8.16339e-31	5.0033e-27	6.4143e-32	2.26372e-32	6.86189e-32	4.88529e-33	2.01923e-32	1.38987e-34	4.34913e-33	2.46657e-28	6.50858e-26	1.27365e-26	2.71255e-30	1.37064e-30	2.18685e-33	6.07494e-28	1.98577e-34	9.69605e-25	1.11811e-28	9.77067e-34	2.15956e-30	2.99238e-33	6.91737e-30	3.78428e-30	1.36139e-30	7.04183e-30	3.76461e-37	7.08746e-32	1.91193e-22	1.19967e-37	2.12838e-29	3.22698e-25	3.74555e-27	5.53862e-27	2.46142e-29	4.61884e-33	1.54654e-25	7.70293e-35	3.78422e-26	5.15579e-32
LDL	6.1674e-49	3.54946e-45	2.50425e-50	8.1688e-46	1.29754e-40	7.70762e-49	7.67972e-50	4.95572e-49	1.2822e-49	1.21698e-45	1.36085e-45	9.96905e-51	1.23386e-42	9.21006e-37	2.00012e-43	1.96744e-37	1.53575e-41	2.87576e-48	2.07305e-40	2.1813e-43	1.88376e-42	3.39873e-44	2.89795e-46	2.07067e-45	1.25203e-44	6.57647e-42	2.6878e-36	2.35015e-46	5.19957e-45	4.01944e-46	2.57262e-44	7.79123e-43	6.85738e-36	1.56435e-46	5.46913e-42	2.52622e-46	1.13342e-49	2.59325e-49	1.11675e-48	1.1556e-43	1.17279e-47	1.30644e-40	3.53174e-55	1.66888e-44	2.1655e-41	1.90308e-45	2.68343e-39	4.28429e-37	3.95465e-47
LDS	8.04851e-15	2.57421e-11	1.7979e-11	8.3908e-10	3.29018e-14	5.28003e-13	5.38869e-12	1.61746e-13	2.70914e-15	6.39105e-14	5.77377e-11	1.72159e-08	1.38591e-14	5.43857e-12	2.20076e-14	1.14554e-08	2.40945e-10	3.11314e-14	4.86742e-10	1.94446e-13	1.99053e-12	2.08994e-12	1.52971e-12	2.24196e-12	1.43977e-10	4.61031e-11	2.94383e-12	1.64432e-13	9.41866e-14	2.06157e-15	1.49925e-15	1.44606e-09	8.6719e-14	4.67229e-11	1.63643e-12	1.30039e-15	8.92398e-12	7.59444e-13	5.28772e-13	3.30867e-09	9.15576e-11	3.47955e-14	2.57803e-18	1.04908e-15	3.01031e-10	7.922e-16	3.72292e-11	2.1859e-15	2.23477e-13
LDV	1.63312e-17	2.84545e-12	3.28048e-19	1.41903e-17	8.55545e-19	1.76426e-14	3.84763e-17	1.13083e-12	1.65921e-16	5.71757e-14	5.14405e-11	8.00669e-15	1.10472e-15	4.05206e-17	4.32503e-18	2.37218e-12	1.16672e-13	2.69398e-18	3.00708e-16	7.82111e-19	4.48439e-15	2.83832e-14	6.35247e-19	1.60464e-16	6.20725e-13	2.07405e-17	5.35731e-16	4.54829e-11	1.23269e-17	5.24518e-15	2.12452e-22	7.27199e-15	1.91319e-18	2.58148e-16	7.66209e-16	1.16509e-15	1.42569e-16	1.17369e-15	3.92699e-15	1.20259e-14	1.87654e-14	1.18638e-16	9.79772e-17	1.4385e-14	2.76366e-14	1.58456e-17	2.94253e-15	5.14126e-15	1.06811e-16
LE	2.31049e-52	3.36911e-50	6.64187e-48	1.09822e-42	5.38833e-53	3.84724e-45	3.08379e-50	3.46114e-46	1.90983e-46	9.56235e-43	9.70089e-48	5.7166e-41	1.98386e-43	3.10948e-43	3.18275e-57	1.08407e-44	1.57512e-50	1.32426e-48	5.00183e-44	1.73226e-44	8.13609e-40	1.68387e-45	4.24247e-46	1.8873e-47	6.1562e-52	2.19232e-47	1.24873e-45	7.22086e-50	7.15323e-52	1.89507e-53	3.45322e-40	6.98165e-44	6.35225e-52	3.1555e-53	3.9845e-44	1.32417e-48	9.49746e-43	1.1558e-51	2.21361e-48	1.70572e-47	1.2023e-46	8.31003e-38	4.63992e-49	2.81317e-47	6.38682e-48	2.62482e-45	3.79606e-38	5.15598e-47	3.14293e-45
LEC	1.2804e-08	1.58411e-09	2.44775e-11	1.07682e-11	3.92739e-11	7.854e-12	7.68057e-12	7.30135e-16	3.9231e-12	1.03007e-11	2.38466e-13	7.51931e-14	2.48359e-12	4.31274e-11	6.25395e-12	2.82607e-11	7.65164e-10	7.07011e-10	8.73653e-10	2.16551e-10	8.06819e-13	3.31002e-12	2.61e-13	4.04404e-11	3.21699e-11	9.82381e-13	3.51526e-12	7.32889e-10	2.7765e-11	2.88216e-11	1.54469e-14	2.74934e-11	2.01393e-10	1.8669e-11	1.9501e-11	3.63217e-11	6.18894e-11	1.07451e-12	6.75521e-09	5.56232e-10	3.23562e-10	1.82219e-09	8.03133e-10	8.17656e-10	4.1398e-11	8.82773e-13	3.24725e-09	2.5254e-12	1.40581e-09
LED	2.70893e-18	5.28833e-22	1.97896e-17	5.81072e-21	2.62945e-17	4.00562e-16	1.27414e-17	1.30441e-18	2.08842e-17	1.51955e-15	1.59113e-16	9.45681e-20	8.98254e-25	1.6639e-17	1.03164e-15	5.50747e-18	1.7476e-21	1.19402e-21	1.39909e-17	9.46433e-17	3.51749e-18	1.92555e-18	4.74164e-18	1.50647e-18	3.16078e-20	6.83517e-25	2.32955e-21	1.82764e-19	1.62396e-21	1.64636e-18	1.81283e-16	2.4249e-17	6.73252e-22	8.12551e-15	1.31107e-18	3.84769e-25	4.35959e-19	2.05897e-19	2.46919e-25	6.94133e-21	5.48395e-17	2.35749e-12	3.15456e-19	6.59774e-21	7.90364e-20	9.79914e-18	7.50976e-17	5.58302e-21	7.98277e-19
LEE	4.79241e-21	9.52622e-25	1.2442e-24	2.70969e-25	8.12796e-25	2.12734e-18	1.98829e-24	1.46628e-20	1.88223e-17	3.45279e-21	2.4951e-23	1.15319e-25	4.48416e-24	1.42484e-26	1.42334e-28	4.23935e-23	2.3574e-21	1.02469e-25	1.62434e-22	1.92232e-21	3.56758e-24	2.01772e-22	4.75939e-20	5.22244e-28	1.56191e-23	5.3933e-22	1.62673e-19	1.74617e-26	1.04057e-24	2.82906e-26	1.45936e-20	2.60442e-26	6.21775e-23	1.70061e-29	5.03005e-28	3.62634e-23	1.13298e-28	1.10088e-27	3.20376e-23	3.46829e-25	1.94739e-26	1.94619e-21	1.38104e-27	6.11734e-22	8.96569e-30	5.54098e-27	8.02121e-23	2.21187e-24	1.02181e-28
LEF	8.46645e-19	5.51286e-14	4.49477e-14	6.38732e-15	6.20494e-14	4.66277e-14	2.24765e-16	7.98534e-14	8.77325e-12	4.8235e-15	5.48811e-16	1.97111e-17	3.21145e-17	6.9471e-14	1.66769e-15	1.69018e-10	1.65431e-12	6.60601e-14	1.19502e-14	5.35637e-12	1.71861e-18	1.22862e-16	2.5778e-13	3.51332e-15	3.64927e-13	7.91539e-12	3.38303e-12	6.57537e-11	8.1932e-12	8.20822e-19	4.0896e-14	2.50829e-11	4.46047e-16	2.41995e-16	6.76618e-18	6.78675e-16	1.78345e-16	2.65661e-17	2.108e-15	1.38793e-11	1.50405e-13	6.30306e-14	6.57992e-19	9.552e-14	1.51449e-12	8.71162e-15	9.28155e-15	4.19737e-15	6.21497e-21
LEG	3.38144e-22	4.97485e-20	3.2068e-14	1.40395e-18	5.06914e-14	3.08065e-14	2.04313e-17	8.27684e-15	6.55328e-17	3.23868e-13	9.15742e-13	2.66197e-16	4.3906e-16	7.44482e-19	1.02e-16	3.37985e-13	4.12923e-18	1.32913e-15	5.45268e-12	1.04595e-14	1.68538e-15	5.47393e-18	2.82764e-15	4.91975e-17	7.62783e-12	1.56646e-18	7.97044e-14	1.52775e-12	1.03983e-13	1.15442e-18	3.23855e-15	1.0247e-11	7.9563e-18	2.33127e-16	2.98254e-12	1.43518e-17	2.4667e-13	2.95202e-13	1.80287e-16	1.49313e-18	3.36652e-12	1.11937e-14	2.37591e-19	2.65662e-16	6.51333e-21	1.7271e-14	8.10492e-14	5.87298e-20	1.59694e-15
LEH	1.77719e-14	1.71754e-15	2.31869e-15	1.59927e-14	2.47417e-16	2.57175e-13	3.50834e-16	1.36594e-08	1.42216e-15	3.0989e-12	8.28553e-17	7.24457e-10	1.70041e-15	3.25506e-14	1.74487e-13	6.46766e-13	4.96128e-14	1.24532e-13	1.8601e-12	3.94135e-12	1.59213e-16	1.23779e-19	8.14624e-15	5.28768e-13	3.47428e-10	3.17477e-11	4.70367e-14	1.66525e-14	2.27745e-16	1.34479e-12	5.47604e-16	1.30175e-13	1.64507e-13	4.76531e-11	4.02339e-15	2.89751e-12	3.71229e-11	6.89337e-14	2.76049e-13	2.91067e-14	2.0289e-12	1.17214e-16	4.88816e-16	5.00277e-13	3.57133e-10	1.97414e-14	3.72191e-13	4.27709e-17	4.80054e-15
LEI	1.06946e-32	2.1612e-33	2.88773e-34	1.35544e-27	5.48059e-31	3.79485e-34	1.50731e-32	9.96949e-32	1.46495e-38	1.02838e-29	1.19066e-28	8.05358e-33	1.55175e-33	6.94042e-34	7.26773e-37	2.52783e-28	1.76616e-35	6.68652e-32	2.12905e-37	2.00595e-29	1.34046e-26	2.15586e-30	9.90289e-31	4.74238e-31	1.34201e-36	2.9028e-31	4.50536e-29	4.50259e-30	3.02037e-35	2.85494e-41	1.34135e-30	1.08778e-37	6.98613e-33	6.30371e-38	1.03948e-29	7.23961e-28	5.42893e-30	3.74518e-35	1.29299e-32	2.16606e-25	3.01089e-35	2.78133e-29	2.2311e-27	2.9429e-37	4.09552e-34	1.05813e-31	1.00881e-29	5.02319e-33	6.13468e-30
LEK	2.25641e-25	9.62453e-26	1.24065e-26	6.40418e-27	9.69892e-33	7.86815e-24	3.10618e-33	3.12716e-24	1.72098e-25	9.71509e-26	8.82103e-33	8.19476e-26	1.64404e-27	7.53205e-27	3.53368e-35	9.61984e-29	2.33434e-25	5.27611e-32	1.49919e-30	4.43497e-27	2.10365e-23	2.77561e-26	9.1336e-27	1.92592e-29	3.70454e-30	1.82737e-24	3.64114e-31	1.29159e-27	2.47775e-25	4.44759e-27	3.12594e-23	4.14523e-27	7.5032e-27	3.53597e-27	5.74755e-25	9.9648e-30	2.88618e-24	1.59252e-26	3.44373e-33	3.76111e-27	7.46188e-25	2.62703e-22	1.7552e-26	1.90567e-25	3.18466e-27	1.93789e-30	1.04883e-24	3.17056e-25	8.97284e-25
LEL	8.89427e-28	2.15801e-19	9.22193e-24	9.64571e-24	1.14397e-27	1.2931e-27	1.12799e-22	4.88683e-24	2.56554e-28	2.16512e-26	2.20535e-27	1.21704e-25	2.60477e-25	5.14836e-22	1.91546e-26	3.96716e-23	2.37018e-32	3.74505e-26	2.34868e-26	1.1134e-22	5.73457e-24	3.12694e-22	2.37501e-27	1.98321e-28	7.83161e-27	2.49009e-24	8.163e-24	3.88136e-29	1.25803e-22	2.29961e-27	7.3744e-20	2.72719e-23	5.04172e-32	3.98954e-20	5.06756e-25	2.76038e-21	1.98124e-21	1.22358e-21	1.08062e-26	1.09403e-24	3.59478e-29	1.29202e-21	7.4797e-24	1.92087e-21	2.07825e-26	6.25639e-23	1.48301e-24	1.91006e-22	1.40818e-24
LEM	5.29382e-10	7.19692e-10	3.56602e-12	5.9216e-09	4.96637e-11	4.76876e-12	7.35115e-11	8.11091e-10	5.13799e-10	1.62146e-12	1.59252e-13	6.32097e-10	8.62616e-13	7.148e-11	1.43738e-09	5.06646e-07	7.27543e-09	1.15906e-12	2.20783e-14	1.13982e-10	4.82904e-09	2.05618e-09	4.70815e-13	2.70941e-11	6.13611e-14	9.61974e-13	1.46875e-14	4.8113e-13	5.78974e-11	8.70812e-12	2.4604e-08	4.38689e-10	3.57793e-10	3.81937e-08	1.64968e-10	9.58524e-12	7.52369e-09	1.0205e-11	3.68685e-11	7.32182e-13	1.1987e-11	1.35201e-09	1.53881e-14	6.71974e-09	6.33461e-13	3.4538e-12	7.24617e-11	3.91735e-11	1.99632e-10
LEN	8.38191e-29	1.96179e-27	2.66897e-27	6.23907e-31	9.58325e-30	3.0591e-28	6.56058e-27	1.55239e-30	4.04775e-36	1.18475e-33	1.92058e-24	5.73368e-33	1.45569e-25	1.04821e-27	6.13129e-35	1.83331e-27	2.86534e-31	1.75653e-34	1.11423e-24	8.06268e-31	4.41984e-32	2.51497e-33	7.37485e-33	3.17068e-33	6.86708e-34	2.39394e-35	1.56632e-28	1.35738e-27	7.95622e-23	7.78242e-30	8.63169e-31	2.00463e-31	1.6701e-32	3.18522e-32	1.95397e-32	2.01881e-27	1.02971e-31	1.93426e-28	1.29297e-35	2.36887e-25	8.10088e-28	2.68994e-28	2.97353e-33	4.06902e-33	2.67222e-25	1.2317e-24	9.39097e-26	3.5085e-31	5.2988e-30
length	1.02512e-85	1.84254e-91	1.69966e-87	2.46497e-96	1.58591e-89	1.50056e-89	3.74502e-87	9.58145e-91	5.45066e-92	3.98608e-90	4.08392e-88	1.5379e-92	5.23425e-92	2.97846e-89	1.29403e-88	3.68714e-80	3.20245e-85	5.46783e-93	1.99149e-89	3.79036e-87	7.66416e-91	9.02774e-94	9.70893e-88	6.49253e-88	3.04671e-87	4.60321e-87	3.39513e-90	1.0101e-87	4.78816e-87	1.36227e-91	3.40964e-89	2.77474e-89	6.2521e-92	4.76462e-83	3.13131e-88	5.64115e-83	1.464e-86	7.22477e-88	9.85872e-94	5.96142e-86	2.84108e-87	1.47961e-84	1.33024e-90	8.17905e-90	1.08678e-88	6.22293e-89	3.14269e-90	4.13759e-89	1.85687e-88
LER	7.72505e-16	6.62735e-12	6.1889e-11	1.26367e-11	1.83224e-18	1.69092e-12	1.80872e-13	5.45042e-11	1.2231e-14	1.2185e-11	6.70801e-15	3.99143e-13	1.37587e-14	5.45631e-15	4.65653e-13	5.71264e-10	3.24902e-15	1.37418e-13	1.76701e-13	7.94184e-13	1.24564e-08	1.07134e-14	1.49013e-12	3.84991e-13	4.8632e-14	6.37441e-15	3.2435e-13	7.36382e-11	4.67008e-16	3.57332e-19	5.40187e-13	6.05507e-19	1.25238e-14	3.42045e-12	2.62543e-08	5.86797e-19	2.69775e-13	4.18883e-17	4.68391e-10	2.21252e-12	3.58081e-16	4.7963e-16	7.38812e-16	9.38793e-12	3.10464e-14	8.21915e-13	1.59786e-11	7.02748e-15	2.38128e-12
LES	3.54283e-32	1.49183e-25	1.52277e-29	3.13184e-21	2.67206e-25	3.79807e-29	5.91806e-31	4.8279e-32	2.22783e-31	8.82048e-31	2.36254e-27	2.73772e-24	1.0351e-19	1.72591e-19	5.86764e-28	6.23135e-25	2.79294e-26	1.26565e-32	7.6207e-30	2.95453e-21	1.79398e-23	4.71731e-26	4.91052e-24	8.86007e-28	6.6516e-28	2.18186e-29	1.41386e-25	4.32846e-28	3.1166e-25	2.85358e-27	1.19407e-27	1.28416e-19	5.18308e-26	8.2958e-26	1.30813e-22	5.65401e-27	3.78502e-24	1.37444e-19	3.58166e-27	2.08579e-25	4.94964e-23	1.35842e-20	1.41777e-25	2.5492e-32	5.10895e-24	3.49696e-23	1.55834e-21	5.2817e-27	6.84504e-24
LET	6.86776e-23	5.74219e-22	3.44974e-25	5.27087e-22	1.49962e-26	3.46744e-26	1.93995e-22	2.50976e-24	8.5715e-21	9.31068e-21	1.72637e-21	1.07167e-22	1.59591e-23	7.54296e-25	2.88831e-28	8.41817e-22	7.26071e-17	4.05419e-23	4.32292e-17	1.08359e-22	1.91114e-24	2.23399e-28	5.61694e-22	9.51358e-21	8.13368e-23	1.01613e-23	7.25036e-18	1.20399e-25	2.90393e-20	2.39848e-23	1.00284e-22	1.0664e-19	3.82291e-27	2.08503e-23	9.01333e-21	3.63524e-22	6.0412e-23	2.18617e-23	2.54336e-29	6.54146e-27	1.29685e-20	3.79973e-19	8.14425e-25	1.93405e-24	1.57335e-28	2.5154e-22	3.05961e-25	5.91567e-24	1.57161e-21
LEV	1.17914e-31	1.94329e-27	2.82811e-24	5.16756e-30	6.27716e-27	1.99697e-26	2.95629e-24	2.0576e-29	1.57712e-30	4.19419e-27	1.38467e-30	2.76084e-25	1.67455e-26	3.50892e-23	1.25583e-30	1.82291e-19	5.1422e-25	1.13773e-30	2.23857e-23	1.08394e-24	2.34013e-21	1.24986e-23	3.14771e-31	6.84339e-27	3.16404e-23	1.7112e-19	1.3469e-25	2.47067e-25	5.36812e-27	1.74486e-28	3.55411e-23	6.44146e-27	1.74215e-24	4.77443e-26	1.00625e-25	1.1925e-26	5.64694e-24	2.3281e-29	1.61909e-21	5.50107e-25	4.21165e-26	1.90654e-22	1.83407e-25	3.20113e-29	1.19845e-23	1.33878e-25	2.18512e-28	1.33388e-23	1.52617e-28
LEY	1.69406e-22	6.88797e-22	6.80313e-20	8.87373e-20	1.24026e-22	1.0634e-20	1.25098e-18	3.70686e-21	8.57191e-23	1.40971e-21	1.66697e-17	1.7999e-20	3.97058e-24	1.26613e-21	5.22267e-23	6.504e-20	9.14209e-23	9.51239e-24	2.13779e-25	4.43059e-21	2.16291e-19	2.79393e-19	3.82566e-19	9.0731e-26	4.43829e-17	2.1451e-20	1.29601e-23	2.78807e-19	5.2499e-22	2.08656e-17	1.38948e-17	4.29468e-17	3.76394e-24	3.75348e-20	1.34977e-18	6.93375e-21	4.99772e-19	2.54195e-19	6.33348e-23	4.0556e-21	5.43207e-19	1.75115e-18	3.51397e-23	9.19522e-20	2.70475e-18	1.19559e-22	5.81803e-25	2.70063e-20	1.78815e-19
LFL	1.40988e-16	1.31539e-16	2.58131e-10	4.19331e-15	1.49046e-19	2.50028e-11	3.19815e-14	3.70218e-14	7.08147e-13	3.68996e-11	5.53168e-11	1.07599e-17	1.29787e-14	4.01049e-13	6.46211e-12	2.89668e-11	9.1561e-17	8.3881e-14	8.02551e-16	3.34891e-12	5.65412e-14	5.79074e-18	2.02847e-09	3.18904e-15	3.40956e-12	9.35569e-14	3.00778e-14	4.01131e-17	5.21152e-11	3.61553e-13	7.75073e-16	4.55898e-11	3.02699e-16	4.39876e-12	8.3651e-14	3.11428e-09	7.01138e-12	1.09342e-10	3.14777e-14	9.64431e-11	2.60361e-14	5.89366e-13	5.15889e-16	7.3649e-17	2.02153e-17	4.14564e-13	1.74262e-12	3.61858e-13	4.08338e-15
LGI	4.66751e-09	5.12088e-11	2.08228e-08	2.78981e-11	4.62691e-13	1.6414e-06	3.38942e-12	1.79013e-11	5.82047e-11	3.49817e-08	1.13807e-10	3.30666e-13	2.26127e-11	3.0602e-12	1.0481e-12	3.43883e-08	7.50427e-10	3.28874e-11	9.32588e-12	4.73382e-10	6.86963e-12	1.4941e-10	7.16864e-12	4.14746e-11	1.86901e-10	3.34185e-12	1.09866e-07	4.36441e-07	4.72371e-07	6.43394e-10	1.12305e-12	2.77524e-08	4.30291e-12	4.16561e-16	1.28416e-11	1.74776e-11	2.90124e-10	3.37221e-08	6.27305e-13	2.18068e-09	3.60336e-12	1.50407e-07	1.89873e-11	6.21109e-12	1.89189e-08	1.14624e-12	1.15346e-08	8.79409e-08	3.98631e-16
LGK	3.58266e-25	1.95676e-26	2.26368e-29	1.21675e-24	9.68217e-30	1.15129e-29	1.44139e-25	9.97849e-28	2.62591e-28	2.4213e-26	5.20958e-33	8.35525e-23	1.46637e-25	2.40513e-28	1.35456e-23	4.63944e-27	1.89468e-31	8.55259e-28	4.2335e-23	8.75599e-31	6.95657e-23	5.7783e-35	2.01407e-27	6.10157e-26	3.94198e-27	1.21014e-28	1.20277e-26	2.88176e-28	1.80217e-24	1.97265e-29	3.43824e-25	3.94026e-26	2.01572e-29	1.52892e-25	1.463e-22	2.4066e-26	8.22966e-24	6.57828e-28	1.30825e-27	1.55897e-28	3.6838e-29	7.21952e-28	1.31786e-30	8.54652e-27	8.41588e-30	1.32305e-27	1.80981e-28	1.97733e-36	5.19113e-29
LGN	8.20474e-23	5.5335e-24	2.16101e-24	2.83151e-25	1.54074e-19	1.99343e-24	6.9237e-20	7.56007e-22	9.65236e-23	2.59152e-23	4.60785e-21	1.73415e-23	2.45717e-20	2.37472e-20	3.05693e-25	3.0717e-23	5.98693e-19	2.32613e-27	2.60752e-23	5.39897e-20	2.7359e-20	3.19467e-24	4.38204e-25	2.20919e-21	8.20797e-24	1.41195e-22	1.5285e-16	7.65943e-22	2.51784e-23	3.13819e-23	1.18526e-20	1.96531e-24	7.49513e-26	3.74394e-26	2.29121e-22	4.55375e-22	4.73431e-27	3.80042e-20	1.59192e-24	3.52065e-20	6.67186e-23	2.80066e-18	1.02911e-25	1.30505e-23	2.18778e-20	1.05416e-25	3.519e-28	6.76117e-24	1.39732e-22
LGQ	1.87302e-11	1.76546e-16	1.22875e-13	2.69401e-14	8.16607e-14	1.88205e-15	2.53551e-13	8.9823e-14	8.02293e-19	3.18492e-14	8.41471e-11	1.35914e-14	9.39428e-15	1.20633e-15	1.3772e-15	2.67162e-09	1.00606e-14	2.37843e-15	7.32799e-17	1.63271e-13	7.0153e-13	2.36987e-13	1.69367e-11	1.93283e-14	6.6577e-15	4.94355e-15	2.33053e-14	5.22235e-14	2.19252e-10	8.52712e-13	1.0285e-14	1.28974e-15	3.52418e-15	6.68015e-15	1.07961e-15	3.31277e-12	1.3425e-15	2.75812e-14	4.15138e-16	1.18305e-16	2.42538e-14	1.02162e-12	1.28328e-13	1.75711e-19	5.30488e-17	5.51597e-20	1.42427e-15	4.92515e-15	5.9113e-15
LGS	2.14801e-15	8.89912e-16	7.92229e-09	2.06644e-14	1.16555e-15	9.83175e-16	7.05551e-16	5.22678e-14	7.67905e-13	2.94529e-17	1.4217e-12	7.98669e-14	1.14817e-19	5.52761e-13	6.68455e-18	4.09833e-12	1.16603e-14	2.12165e-14	2.57729e-15	5.48243e-14	1.53142e-13	7.74792e-18	3.1773e-15	2.23836e-12	1.29643e-14	7.08599e-12	2.75503e-17	2.26811e-19	3.83227e-19	2.49613e-13	6.24503e-16	3.38521e-14	6.61138e-17	1.16465e-16	2.9714e-19	2.79927e-12	1.17497e-15	3.05811e-16	8.75966e-20	5.67151e-13	1.03623e-10	9.27328e-16	6.00752e-14	2.56129e-18	6.10306e-12	3.62674e-14	3.63388e-13	4.80294e-19	4.60014e-21
LHI	5.16338e-09	5.4814e-10	2.08635e-10	5.52871e-14	3.35643e-12	1.82232e-10	1.68755e-10	4.26599e-10	3.03322e-09	6.24197e-13	6.01393e-12	2.56708e-08	6.01641e-13	5.74239e-10	1.78357e-07	7.07207e-10	5.52593e-11	1.86641e-09	7.99648e-09	5.36617e-09	5.63849e-11	2.79625e-13	3.88792e-11	2.62694e-10	2.01258e-11	2.88311e-09	2.35676e-11	1.16202e-09	5.94614e-11	1.78386e-10	1.80116e-06	2.63873e-09	1.41891e-11	8.68351e-13	4.73315e-10	7.39252e-10	5.72807e-13	7.04761e-11	5.97889e-11	1.12921e-09	4.64392e-10	3.51183e-11	6.99638e-11	1.10912e-12	9.12441e-11	1.28544e-09	1.7482e-08	8.63073e-13	4.95075e-10
LHK	4.54563e-15	2.92812e-12	2.88165e-14	8.26326e-16	8.28346e-12	8.66977e-10	6.21708e-08	2.86736e-13	5.32412e-16	9.88752e-15	1.15697e-13	5.66482e-14	5.50505e-13	3.8016e-13	1.33323e-12	2.33733e-14	1.58154e-08	9.0407e-14	8.2624e-14	5.41107e-11	1.04568e-11	1.001e-10	6.38465e-14	1.22696e-11	6.92718e-13	4.8698e-15	2.34317e-15	9.19523e-08	4.61461e-12	1.95439e-16	8.45546e-16	5.53554e-13	6.75791e-12	3.59156e-15	1.78977e-13	8.13697e-14	8.19957e-13	8.01615e-11	6.2058e-17	7.34419e-13	9.96443e-12	7.70675e-13	1.46665e-18	1.3565e-14	3.08816e-10	1.58916e-10	4.97947e-15	5.64329e-12	1.21804e-12
LHL	6.56863e-18	6.54579e-14	2.22309e-18	6.40442e-17	4.9586e-17	6.57319e-18	3.55075e-20	7.87573e-16	2.87456e-15	3.13032e-17	7.50841e-15	9.75782e-17	2.21376e-17	4.86177e-18	1.23787e-17	1.15229e-13	8.60222e-20	8.90377e-13	1.06058e-17	1.25699e-19	1.1516e-18	1.35756e-15	1.80883e-14	1.908e-16	6.21401e-23	4.62925e-17	4.4778e-18	2.36542e-15	3.29614e-16	7.86656e-21	4.47275e-17	1.7754e-16	1.03766e-20	4.53216e-19	9.83942e-17	1.05293e-18	1.73862e-20	9.50384e-20	1.29766e-19	3.77237e-15	1.12363e-14	1.07347e-15	5.27222e-15	6.40886e-23	5.2119e-17	1.2282e-12	1.27836e-19	1.00739e-19	1.0477e-11
LHN	1.49705e-08	1.82049e-08	1.1007e-08	2.14603e-13	1.59701e-11	1.65692e-10	1.45235e-08	1.12149e-10	2.02982e-10	1.96333e-12	2.12756e-13	3.46551e-08	1.5539e-10	1.0745e-08	1.12967e-09	2.73322e-09	8.99904e-08	1.32377e-08	6.27043e-11	1.00891e-06	2.01054e-07	6.0046e-11	4.40366e-11	3.17394e-11	1.47872e-10	9.67379e-12	5.79956e-09	6.01758e-10	1.71939e-08	6.99271e-09	1.82338e-08	5.3822e-11	7.52399e-11	3.47066e-10	4.8569e-13	1.29387e-07	1.14545e-09	9.56198e-09	8.28716e-09	2.40344e-08	4.26951e-09	9.97237e-13	1.91729e-11	1.0708e-10	6.09783e-08	4.27135e-14	4.01352e-08	3.32235e-07	5.42302e-11
LI	6.41985e-15	7.40253e-12	9.25766e-19	3.51545e-17	2.31865e-14	9.47121e-17	9.7008e-19	1.82375e-18	2.66419e-14	5.46017e-15	4.9007e-15	6.06902e-20	3.17206e-15	1.01528e-15	4.94317e-17	4.63306e-17	3.62083e-21	2.20727e-14	8.16662e-25	2.29418e-11	7.34307e-15	5.96658e-17	2.60688e-17	2.37614e-19	4.29298e-20	1.06197e-19	2.63526e-13	2.5042e-17	4.17281e-18	1.64245e-13	2.88998e-17	2.95514e-15	4.77673e-17	1.00955e-15	2.66526e-18	1.29791e-15	2.0067e-18	2.28472e-18	6.49689e-16	5.07366e-20	1.82387e-18	8.1979e-21	7.0218e-19	9.03212e-20	1.02558e-15	5.77933e-16	1.60714e-13	2.79197e-18	2.14225e-16
LID	2.4601e-14	1.09854e-13	5.17311e-20	3.10676e-11	3.58624e-14	1.12676e-12	7.86117e-15	7.54807e-13	9.64319e-12	2.05302e-15	2.31207e-14	7.27585e-13	3.48243e-10	9.09364e-16	2.38344e-14	2.44342e-14	3.5508e-14	3.60683e-13	2.43158e-14	1.94938e-14	9.32315e-11	1.53845e-14	2.53886e-16	2.99264e-13	1.13943e-11	1.25774e-17	9.40415e-14	9.3958e-11	2.56016e-12	2.78382e-16	2.39834e-15	1.01226e-14	5.55624e-12	1.20441e-10	1.97291e-13	6.24291e-12	1.56383e-19	2.02256e-14	1.06055e-15	6.44393e-18	1.92895e-13	2.79956e-12	1.11352e-18	9.8687e-15	9.29718e-16	4.48104e-12	1.85708e-10	4.66359e-13	1.45535e-17
LIE	3.4267e-15	7.44235e-13	5.39632e-14	4.32033e-18	3.74307e-13	1.95436e-13	6.61086e-17	1.31184e-18	5.87178e-18	1.72593e-15	3.40715e-17	4.89225e-18	2.89871e-22	1.94925e-13	7.99365e-14	2.75393e-12	6.06128e-17	4.68842e-19	6.965e-18	4.03065e-14	1.62622e-14	8.75331e-15	1.03925e-15	4.08641e-13	1.50144e-14	7.55326e-14	3.97118e-18	3.57356e-12	2.82492e-14	1.76704e-12	5.17589e-16	2.33415e-16	1.69715e-13	6.14798e-15	8.54048e-16	2.11776e-15	1.77146e-15	2.16958e-15	7.60928e-13	1.20209e-13	3.47018e-15	2.61792e-16	1.11531e-14	8.55095e-17	7.91061e-15	3.40853e-11	1.47244e-12	8.97462e-13	3.19939e-18
LIG	1.29827e-11	1.03912e-10	1.06778e-16	3.56766e-10	5.03326e-10	5.20772e-12	2.05706e-08	6.80592e-10	5.40726e-11	1.0979e-09	1.08708e-09	1.81055e-12	2.20361e-08	6.82708e-12	2.92952e-15	4.547e-11	2.80568e-15	1.59694e-11	9.44056e-14	7.96848e-16	1.50324e-09	7.74852e-11	3.50963e-14	1.23896e-09	7.4699e-12	6.23385e-08	7.32043e-10	1.48311e-10	1.52237e-11	5.17952e-11	9.86597e-12	2.06896e-09	1.07671e-09	3.65347e-09	1.75517e-08	2.39396e-11	7.10439e-10	1.54966e-12	1.41517e-14	5.4652e-13	1.002e-10	2.71531e-12	6.35616e-12	1.46072e-10	3.70643e-10	7.27753e-17	2.00506e-14	3.08419e-08	7.41223e-12
LII	1.98433e-11	1.01198e-15	6.03823e-10	3.16147e-15	3.07412e-13	6.81726e-12	8.46364e-13	2.98334e-13	1.49431e-09	4.70185e-13	1.04553e-09	1.88419e-14	1.04524e-15	4.35439e-11	5.85046e-12	4.99306e-10	1.25792e-12	1.27886e-14	4.34396e-17	1.16745e-12	2.11517e-10	8.2437e-15	3.76251e-16	1.69292e-11	2.81956e-13	5.04055e-13	7.75027e-13	2.79904e-14	1.52971e-12	1.59834e-10	1.13355e-13	1.57401e-17	2.38251e-16	1.93625e-09	4.0463e-14	1.33381e-11	1.20863e-15	9.20956e-13	4.15932e-14	3.93969e-10	1.5286e-15	2.46952e-13	5.8542e-12	2.0679e-16	6.56397e-13	1.00854e-13	6.74768e-14	9.22544e-13	1.96977e-16
LIK	7.24855e-08	3.16679e-07	2.16117e-13	3.07927e-07	1.26346e-10	6.55656e-10	5.11079e-09	1.05296e-08	1.92299e-11	4.98802e-13	7.66949e-09	9.7302e-10	2.03934e-10	1.10488e-10	1.49508e-08	4.66089e-06	3.6146e-09	3.11638e-12	4.24497e-13	3.13405e-08	1.53607e-07	8.29203e-09	5.1222e-13	6.76794e-11	2.87535e-11	2.84683e-09	5.61028e-08	2.38788e-06	5.11681e-10	6.75634e-08	9.85204e-13	3.76968e-08	1.48337e-11	1.48106e-11	6.27995e-09	1.06861e-10	3.24718e-08	8.48543e-11	2.37545e-09	7.35909e-09	1.77373e-07	3.49393e-08	6.63465e-10	3.06074e-09	2.49695e-07	1.22609e-09	9.83965e-12	9.03149e-14	7.10422e-09
LIL	1.61765e-12	8.02202e-13	3.85558e-15	1.85955e-12	3.68444e-14	5.36579e-16	3.79835e-16	7.54285e-13	1.58302e-19	7.5112e-16	4.19858e-12	3.25786e-16	1.11172e-13	1.6883e-13	2.09149e-13	4.36814e-12	3.68018e-16	9.16926e-13	2.44025e-18	3.83305e-12	6.11183e-14	5.28647e-14	2.41874e-11	1.19686e-15	3.50095e-16	2.98757e-17	1.72997e-13	2.96387e-15	3.50095e-16	6.17459e-13	5.88791e-14	8.96082e-15	2.54122e-16	2.44891e-16	4.11187e-14	6.28655e-16	1.4141e-16	8.54054e-14	1.93181e-13	2.01223e-13	8.56242e-12	1.22451e-16	7.87922e-19	3.57434e-17	1.09865e-13	4.70679e-12	7.9236e-13	1.37513e-15	1.28884e-15
LIN	4.28912e-11	9.99469e-07	9.72417e-11	1.52216e-13	7.94469e-11	2.79999e-11	6.94712e-12	3.83037e-12	6.24505e-10	4.76715e-12	2.07743e-13	5.91562e-11	3.54413e-13	6.94336e-15	1.12143e-12	6.22407e-14	3.1421e-16	1.30947e-15	2.68914e-14	3.88882e-13	6.49568e-13	1.41891e-08	4.29466e-12	5.41188e-11	2.1779e-14	2.15212e-14	4.9823e-14	3.14137e-13	2.07869e-10	8.96301e-14	1.88688e-08	1.57304e-10	4.82303e-13	8.66218e-12	3.96196e-17	1.03754e-10	1.74154e-14	2.95966e-09	1.29185e-11	1.40649e-15	2.20064e-16	1.07752e-13	6.08703e-12	1.65085e-12	3.41029e-10	1.10371e-14	1.34389e-12	7.92289e-15	2.99911e-12
LIQ	1.56785e-11	4.40058e-08	1.14868e-08	3.5952e-09	6.98463e-10	2.85951e-12	1.28121e-10	3.84048e-10	9.84796e-11	1.58299e-13	1.18866e-08	2.95133e-11	3.41246e-10	3.85484e-14	9.22297e-10	1.02417e-13	2.181e-10	6.89125e-12	5.4902e-13	2.60129e-14	7.16232e-12	3.64939e-13	4.0056e-12	2.26414e-13	2.81041e-10	6.04723e-10	2.33392e-14	4.0551e-10	5.78816e-12	4.01259e-12	2.06889e-11	7.76424e-11	4.28994e-11	9.55175e-12	4.26097e-10	5.55254e-11	2.6844e-14	2.37052e-14	3.50685e-14	5.22492e-10	3.07135e-11	2.32454e-13	1.12007e-14	1.1265e-11	7.10136e-10	2.99362e-13	1.93083e-08	2.13072e-15	8.22963e-14
LIS	3.54935e-11	1.33933e-10	9.66281e-09	8.27688e-10	9.26398e-14	9.5766e-12	4.60432e-13	2.8429e-08	3.40505e-10	1.78032e-13	4.41033e-11	3.05872e-12	1.75164e-11	1.29664e-10	6.83291e-16	4.65247e-11	1.26775e-12	6.67258e-12	2.10984e-13	2.39815e-07	5.56956e-11	1.16189e-13	4.07035e-09	4.7954e-15	3.80172e-09	1.61872e-06	6.23862e-11	2.33865e-11	2.01004e-10	2.4763e-10	6.12538e-11	4.47528e-11	3.18504e-11	1.5274e-10	1.52484e-11	2.89424e-10	2.13894e-07	5.46735e-11	4.14224e-12	8.25013e-12	2.09373e-10	2.32161e-11	1.06822e-13	5.8562e-10	5.87086e-12	5.14124e-08	8.64986e-12	5.46031e-12	4.47096e-12
LIV	1.58179e-22	2.68268e-15	3.35352e-18	1.29427e-24	5.37567e-17	1.05316e-13	3.25752e-17	9.38609e-15	1.0575e-14	3.11902e-13	3.56216e-19	7.82183e-19	1.25605e-18	1.59749e-19	1.87418e-15	6.50527e-17	5.87711e-19	1.94019e-17	2.64451e-14	4.6483e-16	1.44061e-16	1.01699e-16	1.92324e-16	1.7878e-18	3.91664e-17	3.58303e-19	1.66369e-13	3.873e-19	5.22372e-15	5.56899e-18	7.45836e-21	1.5164e-14	1.0023e-23	3.37973e-19	1.92528e-14	5.40667e-15	3.71254e-18	1.45058e-16	1.00777e-18	1.18826e-18	6.92654e-19	1.03901e-12	1.66458e-22	8.78346e-16	1.57008e-17	5.14112e-13	1.11125e-18	4.01094e-19	5.19766e-16
LIY	2.25956e-12	1.04278e-11	6.42772e-15	2.23001e-15	1.03557e-14	9.70659e-13	1.43445e-14	1.32195e-15	1.68461e-16	2.40175e-12	1.86482e-13	3.37461e-13	3.67347e-16	4.21685e-10	1.15796e-12	3.47735e-10	2.25122e-12	1.88774e-12	8.1943e-12	7.98974e-11	4.99026e-13	1.94503e-10	3.95057e-13	5.36586e-13	1.65431e-12	2.70845e-18	7.87903e-13	5.60651e-13	1.7543e-08	6.51609e-14	8.3829e-16	2.03317e-12	1.65474e-16	6.05718e-10	3.68156e-16	1.86483e-13	7.0019e-15	9.24053e-16	1.50069e-15	1.28097e-14	1.46013e-12	1.00083e-16	1.11268e-15	1.67782e-15	4.1152e-11	7.95342e-14	1.67646e-17	2.85186e-17	7.86963e-15
LK	4.31972e-45	1.21465e-50	2.37956e-46	2.64996e-41	2.6268e-50	1.00354e-41	9.56921e-48	1.11446e-41	1.01938e-43	4.93331e-40	2.96959e-47	4.3622e-42	4.59552e-46	2.60226e-42	2.02361e-46	5.53039e-47	8.18291e-49	3.25265e-51	5.44617e-47	1.19832e-44	1.80134e-49	3.94961e-52	1.98872e-44	3.73285e-48	2.3309e-47	9.08126e-45	1.64616e-43	1.00041e-50	4.96689e-47	1.53444e-48	1.44118e-49	1.11387e-37	8.28537e-50	1.43074e-48	1.65232e-45	4.63763e-50	7.14679e-46	7.94759e-45	1.31272e-43	4.57634e-54	5.29558e-47	5.50487e-49	7.18714e-46	9.67504e-46	7.35901e-46	3.77815e-43	1.53445e-48	1.60483e-46	1.94473e-48
LKA	6.9492e-09	1.39337e-11	5.41485e-13	1.92562e-13	7.75288e-12	1.03545e-14	3.82181e-11	7.32895e-14	1.1309e-08	4.76136e-10	7.55636e-15	2.63509e-17	2.16599e-10	1.0239e-14	1.75896e-11	7.22137e-11	4.23194e-13	3.77184e-12	6.04343e-15	7.09252e-08	5.22554e-13	1.56999e-13	3.30732e-10	4.01802e-17	1.26812e-13	5.14314e-14	3.42514e-09	5.07428e-13	1.53559e-13	3.60959e-17	2.96509e-14	1.01013e-16	2.92411e-13	2.58556e-11	9.99963e-17	9.81419e-10	1.3637e-12	2.06457e-11	9.60258e-14	9.89609e-11	1.98336e-12	5.44121e-14	1.63148e-12	5.61329e-13	6.59362e-11	6.41094e-10	2.40093e-14	2.1275e-09	9.86028e-15
LKD	2.06961e-16	2.57327e-23	2.04812e-23	3.13567e-13	1.67743e-21	4.22845e-19	1.84424e-19	5.07985e-16	8.06877e-17	2.23397e-20	5.34665e-18	4.15915e-18	3.17598e-21	4.80341e-15	7.41466e-16	9.83549e-17	3.01183e-18	4.25925e-15	1.4905e-16	1.03536e-16	8.10536e-22	8.38221e-24	1.56092e-19	9.6025e-21	4.30976e-18	1.04843e-19	8.45271e-21	2.0908e-17	6.33652e-20	1.8701e-22	4.91848e-16	1.38476e-19	2.69365e-16	4.53594e-15	6.30653e-18	2.52077e-20	5.9386e-15	1.35996e-13	1.55125e-20	8.20665e-23	9.3694e-18	3.95722e-20	5.23085e-19	7.17015e-21	4.89715e-20	3.46938e-18	2.30645e-18	8.15352e-20	4.84196e-25
LKE	1.83406e-29	1.57807e-39	1.98975e-31	3.17493e-33	2.39976e-36	1.01933e-34	2.5859e-39	2.8663e-31	2.86402e-36	2.73069e-28	1.43038e-38	2.07778e-33	2.96477e-29	4.37097e-36	1.68399e-37	4.57039e-38	2.0965e-33	1.37699e-33	6.06743e-40	3.69281e-34	5.37064e-34	3.10573e-37	1.75244e-31	5.76293e-29	2.37324e-36	3.22043e-35	3.23594e-32	6.0749e-38	1.8919e-34	6.63997e-42	4.42047e-34	5.83344e-27	1.35471e-38	1.70727e-36	6.2799e-35	2.62869e-36	4.386e-28	5.97133e-37	3.72211e-36	3.36441e-33	3.88794e-33	7.27929e-33	3.39779e-30	3.54328e-33	6.32032e-36	5.44618e-33	1.12772e-36	7.29025e-34	6.78854e-33
LKF	2.21349e-09	2.23112e-12	5.92317e-13	1.93259e-15	1.51353e-07	3.18919e-11	9.58688e-13	4.99015e-12	1.59919e-13	2.25753e-10	2.6427e-11	9.57896e-13	5.82857e-10	2.03646e-11	2.12158e-10	5.36963e-10	1.32961e-13	2.53255e-14	1.42482e-14	2.4228e-11	1.87959e-15	1.41845e-13	1.09911e-14	2.92004e-11	3.57681e-10	1.14517e-08	3.58777e-10	4.06074e-15	2.40416e-12	5.67959e-11	6.21135e-12	6.02706e-14	4.55381e-15	9.93851e-12	3.93461e-12	2.76932e-10	2.50043e-09	9.27808e-13	2.85736e-17	1.53142e-11	8.70388e-13	2.64355e-15	5.04146e-13	1.03184e-11	6.63509e-15	5.43774e-11	1.58627e-11	7.24026e-14	3.43449e-09
LKG	7.78983e-20	1.42962e-25	1.56866e-21	5.45053e-20	2.1076e-20	6.86469e-20	7.24607e-23	3.99936e-18	4.50638e-24	9.74353e-25	6.98696e-21	5.29467e-18	2.65039e-28	2.13962e-20	1.88954e-22	5.44512e-20	1.54924e-24	1.32757e-21	1.69669e-22	1.80889e-24	2.38104e-19	2.85806e-24	3.1127e-23	1.08543e-23	2.89918e-23	8.95114e-17	2.44738e-22	5.26044e-21	1.07268e-20	6.59494e-24	3.00615e-26	2.46929e-21	9.02142e-28	7.14939e-23	1.43695e-18	2.9912e-20	3.81057e-25	5.04589e-21	1.52575e-18	1.67869e-29	1.13934e-23	6.74845e-23	6.67251e-21	9.71966e-25	2.03491e-18	4.81677e-20	4.5213e-22	4.978e-20	7.05232e-23
LKH	3.03664e-20	4.74473e-21	1.17152e-19	2.64071e-17	9.91395e-20	5.17984e-20	2.81208e-16	4.19124e-13	4.90878e-18	1.02886e-14	2.38935e-17	5.54656e-17	7.9285e-15	1.28215e-13	4.78279e-17	7.39441e-17	1.92714e-18	1.14886e-17	8.49574e-18	6.27594e-13	1.52918e-18	5.81804e-16	1.53924e-15	1.08252e-16	1.37069e-21	2.43731e-18	1.26973e-14	1.12219e-18	9.48691e-17	7.03197e-14	6.80082e-21	6.86922e-15	1.51644e-21	6.26388e-20	2.11293e-20	1.76946e-18	1.92313e-18	8.27227e-19	5.26081e-19	1.0852e-18	2.75576e-15	1.70575e-16	1.47705e-20	2.26637e-16	4.68685e-16	3.3151e-18	2.19747e-16	1.45498e-16	4.48645e-19
LKI	1.23109e-27	1.47332e-25	7.85435e-24	1.89235e-23	6.87567e-23	4.69289e-27	3.22846e-25	5.77122e-23	1.89302e-20	6.7463e-20	3.39897e-19	1.83854e-21	4.22688e-27	5.20907e-24	2.51874e-25	1.09014e-29	1.23929e-28	1.15888e-26	3.42813e-27	2.18622e-26	1.07885e-25	5.23306e-30	2.18503e-25	5.04598e-24	7.96017e-26	6.0701e-21	4.48765e-21	7.91376e-27	3.54559e-24	3.87297e-26	8.54363e-21	4.23407e-20	3.75756e-26	3.74756e-20	6.72267e-22	6.07488e-23	9.72783e-24	6.12906e-25	1.0237e-25	1.44603e-25	6.43861e-28	1.01734e-24	1.42681e-28	1.03285e-20	1.19621e-25	9.46655e-21	7.04038e-26	6.25299e-23	8.85053e-24
LKK	2.11888e-29	3.63938e-19	3.10369e-20	3.59488e-25	1.03033e-24	6.06368e-21	4.87646e-23	2.41332e-20	4.49053e-24	2.43039e-21	1.12203e-26	1.27935e-22	2.50182e-22	3.42975e-27	8.3582e-24	4.95408e-24	3.32041e-22	1.69252e-25	7.94867e-22	4.01015e-23	5.62479e-22	2.96556e-28	8.29314e-25	4.8035e-24	2.53225e-25	1.27285e-23	4.8499e-22	1.11639e-29	1.88137e-26	5.93924e-19	3.02692e-27	1.62825e-21	3.75053e-25	3.65305e-22	4.74981e-26	3.70057e-29	2.47419e-22	9.87604e-24	4.04235e-29	2.92368e-21	8.75594e-28	3.33067e-21	6.95178e-23	9.5216e-28	4.44789e-21	1.18128e-28	3.0447e-20	9.13686e-27	4.75728e-22
LKL	4.90927e-29	1.69771e-36	2.84895e-27	2.08334e-31	2.90658e-33	1.40159e-25	9.21857e-32	5.99634e-29	2.93705e-33	3.50723e-28	3.3018e-29	2.03674e-33	2.88694e-32	5.52859e-38	1.0897e-29	1.09002e-26	9.99181e-38	3.146e-38	5.57937e-36	2.86207e-37	2.48432e-32	5.50912e-32	2.82685e-28	1.29928e-29	4.37129e-34	3.18362e-32	1.01463e-26	2.43569e-30	1.83116e-30	9.77984e-33	3.96383e-34	5.81767e-32	2.53275e-37	3.05217e-31	1.35067e-34	4.25021e-33	2.69292e-31	4.22121e-32	1.10863e-24	1.2125e-33	4.21963e-32	7.16999e-31	8.12816e-30	3.80007e-26	1.1854e-25	7.74628e-30	8.81194e-26	9.48905e-35	2.99801e-30
LKN	3.06951e-16	1.39624e-14	1.55601e-16	2.51151e-15	1.39162e-18	1.15834e-12	1.47954e-16	5.21768e-14	3.16298e-10	3.30992e-18	4.06093e-17	1.02116e-18	5.30754e-18	4.76426e-15	5.80149e-15	2.6873e-15	1.92332e-15	7.61247e-15	1.55513e-17	9.58255e-17	1.84355e-18	3.8732e-17	2.31359e-16	2.44082e-14	1.9222e-20	3.50032e-15	2.21111e-15	4.74141e-13	8.51209e-15	4.91407e-18	1.12522e-13	1.79333e-12	2.22241e-19	6.67035e-20	4.51332e-15	6.46787e-18	4.15166e-17	4.61854e-11	2.91201e-15	1.59054e-19	1.07319e-15	2.29987e-14	4.17856e-22	1.25189e-16	3.44515e-14	5.31054e-15	1.72852e-16	3.79454e-18	3.17229e-14
LKR	1.38287e-15	2.63525e-12	7.34674e-13	1.28034e-15	2.11764e-17	1.54505e-17	4.30652e-10	3.24454e-13	2.63525e-12	2.62602e-10	4.80101e-14	2.58439e-16	4.6502e-19	1.89302e-12	9.49475e-14	4.2219e-14	2.54561e-13	2.45206e-18	2.7777e-11	1.57951e-13	1.9813e-14	1.01911e-13	3.05294e-12	6.03043e-17	1.55185e-17	3.37453e-15	3.63119e-17	5.58847e-14	1.40873e-10	5.2639e-22	3.29302e-16	1.59274e-16	4.82523e-10	1.11574e-10	3.33535e-17	1.14719e-12	1.18421e-17	4.06356e-16	3.30424e-16	8.03762e-17	1.53548e-13	2.72783e-14	9.38963e-16	4.03652e-16	9.64758e-14	3.56928e-13	1.61435e-16	8.53897e-11	1.1626e-18
LKS	1.08798e-27	3.68655e-25	1.65731e-22	4.12513e-22	1.1148e-30	1.02223e-21	4.90528e-19	1.13675e-26	3.2761e-23	1.90009e-21	1.65092e-27	1.04382e-21	3.89713e-26	1.00818e-21	5.55547e-27	3.28266e-21	4.8538e-27	1.93398e-29	2.12454e-23	1.79946e-21	8.98629e-28	7.62692e-31	7.06268e-24	6.29141e-31	2.40362e-21	2.26141e-22	5.56803e-21	1.4225e-21	3.61236e-19	1.36993e-23	9.95751e-25	7.59136e-24	5.91288e-34	7.41005e-23	1.73296e-25	7.84043e-25	1.65504e-20	1.3985e-25	7.56841e-25	4.44867e-22	2.1271e-23	5.10922e-19	1.71263e-26	2.00391e-25	1.62471e-27	5.48887e-25	8.97421e-28	1.09933e-24	6.40928e-24
LKT	1.2026e-26	3.03179e-24	2.34705e-36	3.91467e-22	1.24973e-25	1.9647e-25	6.42378e-29	7.02111e-24	8.02333e-25	2.16926e-30	6.82303e-24	1.51094e-29	4.60798e-29	5.13023e-26	5.92484e-31	4.88375e-28	5.97479e-30	6.88442e-28	2.70083e-23	3.12509e-28	7.79907e-31	1.37525e-25	2.36791e-24	3.01096e-30	1.44008e-32	5.47833e-31	5.25778e-31	1.43239e-27	7.7111e-31	3.74715e-27	1.09162e-27	8.47167e-24	1.72925e-32	2.45676e-31	3.19902e-23	2.42706e-30	3.1433e-29	3.23599e-27	7.93472e-23	2.19511e-29	4.79504e-25	2.10737e-25	3.48514e-29	1.56694e-29	3.3536e-33	1.68752e-23	6.67735e-25	7.19471e-29	1.30284e-31
LKV	2.23222e-23	1.1146e-25	6.39034e-25	2.25571e-24	1.28389e-24	4.13925e-24	1.53308e-26	4.02635e-25	5.91947e-25	2.73949e-23	4.34357e-26	1.0416e-24	2.80326e-29	2.50179e-25	7.22926e-28	6.45555e-21	6.7734e-18	3.22154e-31	3.21782e-24	4.63124e-28	1.64119e-23	1.77587e-32	1.1258e-27	1.4376e-21	9.76628e-25	1.02932e-27	8.07123e-20	4.79981e-26	4.93884e-24	1.78714e-30	3.63595e-23	8.06525e-22	6.06522e-21	3.62472e-28	6.54123e-23	2.57372e-25	1.9184e-25	4.47471e-21	5.16633e-26	1.85263e-21	1.15712e-26	7.65423e-29	1.55339e-27	1.13085e-26	3.66748e-27	1.64873e-25	5.41912e-25	5.95393e-24	2.79171e-24
LKW	3.69061e-08	1.51176e-08	9.49779e-10	2.86446e-07	3.45142e-08	1.43091e-09	2.16733e-08	9.21968e-08	3.19634e-07	9.18665e-08	2.55165e-11	3.89555e-10	3.33004e-06	6.46963e-12	4.10298e-09	1.20519e-06	2.0998e-07	1.06153e-09	1.31847e-08	4.07832e-09	7.47617e-07	2.69267e-07	4.74797e-08	9.5378e-10	7.88403e-08	1.01926e-07	1.18546e-08	3.28927e-10	6.88469e-08	4.57234e-09	2.67421e-07	9.94046e-08	9.5378e-10	1.30018e-09	4.01329e-09	3.57214e-10	1.32757e-09	3.58767e-10	1.11033e-10	7.89067e-10	8.66687e-11	8.58041e-08	6.55106e-07	1.41055e-08	6.10373e-12	1.50543e-06	1.09477e-07	1.28669e-09	1.34427e-09
LKY	4.03704e-19	3.59659e-19	2.43526e-17	2.30992e-17	4.8181e-14	9.81707e-15	1.40191e-15	2.2543e-16	3.56861e-17	2.67892e-16	5.78235e-15	5.45177e-13	4.20159e-19	1.70221e-14	2.07038e-17	2.12618e-11	8.92153e-19	4.20974e-18	6.28667e-15	8.21906e-17	3.06315e-15	2.00442e-19	5.11201e-14	2.16371e-14	2.17492e-13	1.55108e-14	1.93173e-13	2.46484e-10	6.91467e-15	9.87244e-14	9.08453e-17	1.00968e-14	5.77722e-17	3.49226e-16	5.7446e-16	8.06341e-17	6.91466e-15	1.31959e-20	1.02935e-11	1.16268e-16	8.39334e-18	3.39159e-20	7.79338e-17	1.5701e-16	1.50954e-19	8.41897e-16	3.99297e-22	7.54115e-16	9.5525e-19
LLD	7.89883e-25	1.25874e-15	3.98668e-22	5.86097e-21	9.15567e-18	2.88604e-23	2.81671e-15	4.72334e-20	1.32613e-15	3.65848e-19	2.53819e-21	4.87948e-17	1.93601e-20	2.61913e-19	9.81899e-21	9.56115e-17	1.06665e-19	2.87066e-24	5.4726e-20	8.51538e-19	3.07706e-14	2.37268e-24	9.19232e-17	7.78471e-16	5.85958e-18	7.1654e-22	1.65294e-23	9.25234e-12	1.10753e-26	1.91525e-22	1.39442e-25	2.86931e-23	2.9183e-25	1.42985e-18	4.56656e-26	1.96508e-20	6.10866e-17	1.95931e-27	3.60879e-21	5.43778e-17	3.11107e-17	3.46147e-19	1.44194e-17	3.52306e-14	1.54756e-18	3.35762e-18	9.78579e-20	3.64589e-25	1.14422e-26
LLE	3.26726e-24	6.02613e-18	9.60828e-19	1.0171e-18	2.84217e-24	3.82139e-18	1.1647e-25	9.00011e-18	2.27046e-25	1.66328e-16	4.98942e-23	6.41668e-16	1.99784e-24	2.81117e-23	2.16894e-28	3.2878e-19	6.99718e-25	7.91615e-24	7.09672e-25	2.64585e-20	2.54371e-29	5.28853e-28	1.09857e-28	2.41399e-22	8.70252e-19	3.29865e-29	4.29025e-20	8.97273e-22	3.65853e-18	1.31547e-25	9.30364e-20	7.13271e-17	4.03771e-22	2.11918e-25	4.36833e-23	8.62342e-21	1.85029e-20	3.12296e-21	1.60831e-22	2.08718e-21	1.60747e-20	1.17052e-19	9.14488e-16	7.50603e-22	1.58353e-23	2.55051e-18	3.69836e-20	8.33248e-18	8.59493e-22
LLK	1.04539e-20	2.64243e-15	1.55895e-17	9.7697e-17	4.12375e-20	9.2417e-23	1.20275e-21	2.07242e-18	1.16517e-18	2.74613e-21	7.07308e-18	2.62046e-20	1.4277e-23	5.61006e-19	2.021e-15	1.96465e-17	2.13873e-26	5.081e-25	1.06842e-21	1.84462e-18	4.96814e-22	1.81043e-20	6.72082e-15	1.05948e-16	2.501e-20	3.98647e-18	7.64692e-19	1.18034e-18	3.8743e-17	4.47937e-26	1.19021e-23	1.71884e-20	3.78613e-23	2.06947e-16	3.32458e-17	4.59386e-23	1.18588e-15	2.0001e-19	3.20523e-18	1.02721e-20	2.20444e-21	6.52149e-21	2.52443e-25	6.92048e-24	1.20857e-22	1.16074e-18	2.7348e-20	1.81091e-19	1.39417e-16
LLN	4.26779e-12	6.07652e-10	5.77904e-13	3.59103e-10	5.37865e-11	2.23274e-10	9.02658e-12	3.67331e-10	1.18467e-17	4.69113e-11	1.20684e-10	2.39806e-10	2.30889e-11	2.99092e-09	1.17073e-11	1.98654e-09	1.22694e-13	7.02097e-13	1.26845e-13	4.87293e-15	7.78178e-19	2.55598e-11	1.0313e-10	1.1652e-16	1.56648e-14	2.32395e-12	1.65107e-11	2.27322e-16	2.55811e-12	2.36778e-14	4.64287e-10	9.7808e-11	5.67669e-13	9.47197e-12	1.8538e-11	2.58503e-12	1.65141e-08	4.53116e-14	1.13272e-13	5.76203e-10	9.41396e-12	2.74119e-15	7.21612e-14	2.3529e-12	2.79157e-10	3.44065e-09	4.67205e-10	1.48194e-10	3.30179e-13
LLQ	1.38927e-10	1.88285e-11	1.23669e-17	2.21894e-13	6.79508e-09	2.75851e-09	1.86162e-13	3.46289e-08	5.50619e-14	2.95658e-13	3.06004e-13	1.68559e-10	1.63944e-09	2.46348e-09	9.00106e-13	3.10939e-11	5.05336e-13	2.19955e-16	3.28e-16	5.80512e-10	2.89541e-15	2.40087e-14	2.51275e-09	1.13978e-13	2.71541e-14	1.80806e-11	2.12697e-07	1.84655e-11	5.65424e-09	7.217e-17	2.79206e-12	1.55576e-12	7.05092e-19	5.30198e-13	1.55414e-09	4.47527e-11	7.95696e-15	1.44307e-11	4.49234e-17	1.61274e-12	1.31773e-09	2.05524e-15	1.80032e-14	5.45164e-12	9.28795e-13	1.61602e-07	4.94972e-10	1.14956e-12	1.70059e-12
LLR	1.47665e-13	3.42952e-11	1.0877e-11	4.22424e-14	5.36889e-10	4.03032e-13	6.00361e-11	3.81207e-13	1.22442e-12	3.40626e-13	5.00224e-09	6.60853e-21	6.3291e-10	1.72151e-13	3.78404e-11	2.23661e-11	8.81723e-16	5.91883e-14	8.75266e-15	4.77084e-15	6.61515e-10	1.2472e-14	9.96068e-15	1.54554e-11	5.84964e-13	1.22917e-12	3.06582e-09	4.65299e-15	4.00435e-13	8.60846e-18	1.8895e-12	6.81627e-13	1.14427e-16	1.70855e-10	3.02118e-14	1.71598e-11	5.09071e-13	5.57978e-12	8.82789e-09	1.08018e-11	7.47739e-09	2.67246e-13	2.28584e-12	4.66087e-07	4.53272e-15	2.91452e-10	1.29098e-10	3.15636e-07	1.58325e-09
LLT	1.46544e-17	5.7366e-13	1.48756e-14	5.96576e-15	1.75427e-14	1.34715e-13	4.0434e-13	4.96547e-15	7.84019e-17	3.65447e-12	5.7073e-20	1.63363e-18	4.12926e-14	3.4614e-15	1.18768e-14	6.48835e-13	1.44135e-15	5.43764e-15	1.13371e-14	1.41229e-14	1.63178e-21	8.40254e-20	2.96349e-11	1.01313e-20	1.31066e-16	8.37478e-20	2.16023e-14	2.21507e-12	1.46109e-11	2.57231e-15	9.638e-18	1.23374e-19	2.88549e-15	1.60303e-17	5.80531e-15	2.60426e-08	6.47807e-21	5.24161e-17	3.48046e-17	1.05427e-10	2.83621e-20	2.06054e-16	1.19302e-16	4.26399e-13	1.65048e-22	3.77481e-19	5.66935e-12	2.13956e-15	9.96044e-17
LLY	9.29136e-17	4.79581e-17	2.00316e-16	7.05232e-12	8.41173e-20	1.94727e-15	1.09662e-16	2.56068e-13	6.68487e-20	8.80635e-17	9.33958e-15	7.5799e-17	5.16324e-16	2.51461e-17	7.62042e-16	5.31063e-14	9.51856e-13	3.41184e-12	3.03256e-16	1.66722e-13	1.15135e-13	1.52756e-18	2.55975e-12	8.80358e-12	2.97591e-11	5.16617e-16	3.09635e-19	1.6386e-16	4.1953e-10	1.37641e-15	1.69533e-15	2.21671e-14	1.58008e-18	1.06085e-13	4.97157e-20	1.3596e-16	9.29821e-21	1.23895e-14	1.38839e-18	9.25961e-15	1.13597e-16	1.15964e-12	1.22075e-16	3.49304e-17	6.07343e-20	2.73838e-13	3.01836e-17	6.33618e-12	1.7108e-18
LMH	7.20509e-13	1.41798e-10	3.59376e-07	1.35442e-13	2.6668e-12	3.36509e-11	9.20686e-12	4.15991e-09	3.8505e-09	4.08618e-11	2.87924e-12	4.20604e-09	6.12013e-13	4.46563e-10	1.17293e-11	9.26616e-11	6.26469e-13	1.77398e-13	3.83634e-09	3.78268e-14	4.10342e-11	3.91656e-14	4.29789e-11	1.18576e-11	8.09975e-15	9.34264e-11	3.68749e-10	3.05281e-12	7.0886e-13	6.06323e-13	4.27985e-11	1.12823e-10	2.56063e-12	1.16529e-11	3.23936e-11	3.31341e-10	1.45668e-09	1.42667e-10	3.30863e-11	1.19872e-11	2.41359e-09	6.83221e-12	2.442e-12	2.45306e-12	4.22616e-11	2.36059e-12	1.53146e-15	3.33675e-11	2.5256e-14
LN	1.15214e-18	2.36957e-15	8.93109e-21	8.66617e-16	2.27785e-19	1.9848e-19	1.71822e-21	5.09531e-17	6.19741e-23	6.05191e-22	1.59604e-20	1.61446e-17	1.25414e-14	1.68878e-17	7.98315e-20	7.42052e-20	4.88802e-19	1.91729e-20	4.30816e-17	5.22746e-19	5.39506e-18	8.92994e-21	1.02461e-19	7.19515e-25	1.061e-18	1.20997e-18	1.59734e-23	1.27421e-21	1.79934e-18	3.62825e-16	3.94629e-18	2.99252e-19	1.0706e-22	7.07112e-19	1.55776e-13	2.14041e-19	2.93651e-16	9.59658e-20	9.34242e-22	1.66162e-22	2.03434e-17	2.55935e-22	6.14143e-18	4.40287e-21	8.24761e-19	1.09961e-25	1.66642e-16	1.80354e-19	1.24373e-17
LND	1.71218e-14	2.33956e-16	2.03589e-15	1.30887e-10	6.68197e-10	1.03814e-09	9.31539e-15	5.70894e-12	2.60002e-14	9.34635e-16	1.4263e-12	5.68002e-11	1.30713e-15	9.11207e-09	1.69392e-08	4.78738e-12	1.5895e-15	9.55249e-14	2.57e-10	5.52796e-10	7.0646e-10	5.07336e-18	3.86854e-09	3.58209e-10	3.19389e-14	3.37579e-10	1.15229e-13	4.356e-15	9.60437e-13	2.27964e-14	9.32641e-10	8.68545e-13	1.0067e-14	2.24365e-09	4.0617e-10	3.1109e-13	5.81327e-14	8.15081e-12	4.01606e-13	1.38968e-10	1.3161e-14	6.04335e-15	2.04627e-12	1.59171e-16	1.19774e-14	5.58542e-09	1.23244e-11	6.7134e-14	1.79232e-12
LNE	3.7425e-12	5.3767e-13	8.47869e-14	2.19343e-14	9.18468e-09	3.89585e-12	5.60651e-14	4.54996e-16	1.156e-11	6.75511e-08	3.37142e-12	3.32864e-11	1.46853e-12	2.42861e-11	1.90861e-20	1.79763e-08	1.41431e-16	7.43956e-09	3.92326e-11	2.32364e-12	9.72907e-11	2.27336e-12	2.16295e-13	7.47472e-14	1.53852e-10	5.25959e-14	2.15497e-14	3.11612e-17	1.26439e-18	8.97092e-13	4.07656e-14	1.18061e-12	8.898e-14	6.23217e-14	3.84722e-11	2.4388e-14	1.15341e-10	2.54388e-10	7.54997e-11	2.6969e-12	2.98855e-12	2.005e-12	3.09178e-14	4.38191e-13	1.66567e-11	7.99048e-14	1.20199e-12	1.38113e-10	4.39284e-10
LNI	5.12467e-18	1.38747e-12	1.75362e-17	2.12652e-16	5.1723e-19	8.34761e-14	3.13879e-16	1.40303e-17	3.55201e-18	6.58602e-12	2.44191e-13	1.72776e-15	3.88179e-16	6.09717e-12	4.10604e-14	4.90219e-12	2.57645e-13	5.16958e-18	2.49857e-18	1.03339e-15	8.15296e-16	5.27502e-14	5.23075e-18	1.07333e-13	8.94274e-16	5.09693e-14	4.17288e-22	5.73592e-15	8.80894e-16	6.76461e-12	1.15819e-17	4.78327e-11	4.02185e-13	8.29135e-18	2.47536e-14	2.34275e-14	1.07491e-15	3.49288e-14	8.06322e-16	3.79292e-16	1.68392e-14	1.88274e-16	1.28484e-16	1.63134e-18	2.14455e-14	6.77362e-13	8.83999e-13	1.9473e-18	5.71136e-16
LNK	5.51617e-11	1.21281e-08	4.80365e-10	3.01107e-09	4.47339e-11	2.35273e-09	1.84823e-11	2.38802e-12	1.38592e-10	1.03528e-15	8.4913e-14	2.49822e-09	2.51819e-11	4.67889e-13	1.67663e-13	4.54154e-10	1.01434e-12	1.56747e-13	1.17951e-11	8.80094e-14	3.47319e-13	1.09509e-12	6.38221e-14	2.54164e-13	9.48076e-13	2.60019e-13	6.3165e-10	7.00824e-11	2.26434e-11	1.47394e-14	1.52046e-12	5.30712e-13	1.8324e-10	2.02594e-09	1.31787e-06	3.5929e-12	3.76802e-12	3.12921e-09	4.2814e-13	4.77689e-13	9.90995e-10	1.3379e-12	3.42743e-12	5.66658e-14	1.1663e-11	4.66208e-14	3.45265e-09	1.34879e-12	5.67596e-13
LNL	6.70787e-35	5.84395e-36	4.55702e-40	7.66007e-39	6.5808e-42	9.44631e-40	5.38179e-45	8.76657e-38	1.25371e-44	2.26776e-41	5.49393e-43	6.66519e-41	4.18354e-40	5.69937e-35	2.85268e-34	3.73496e-42	1.05494e-35	2.42978e-36	1.16935e-39	4.01854e-40	4.28615e-40	2.93792e-42	8.04194e-36	7.70343e-41	1.23176e-39	6.17708e-39	4.70809e-43	1.11319e-39	4.59968e-38	2.99147e-39	5.48051e-43	7.83205e-41	8.99107e-41	1.67094e-41	1.07654e-38	3.23633e-38	1.06813e-41	2.29028e-35	9.61329e-36	4.19976e-49	1.39383e-36	1.65389e-39	6.68173e-42	1.69374e-36	2.57061e-33	5.3295e-46	1.33583e-41	3.12419e-37	1.58539e-42
LNN	6.57562e-16	2.22699e-12	1.60611e-15	7.4272e-15	3.56128e-10	3.50886e-15	3.97858e-11	2.56736e-12	5.74933e-12	2.87565e-15	1.64912e-14	2.24041e-16	4.9428e-13	1.32815e-11	3.4215e-10	8.69345e-14	2.19625e-15	2.84731e-20	7.02035e-13	1.96169e-11	5.62141e-14	3.24305e-17	8.50847e-17	5.0885e-14	8.30952e-11	2.05552e-11	2.04574e-10	5.66232e-16	2.86017e-12	5.65239e-14	1.51921e-11	5.26227e-14	4.15118e-14	1.24814e-12	2.87968e-12	5.33542e-15	4.1667e-12	8.0773e-15	1.8204e-15	3.19883e-14	1.31313e-11	4.32276e-14	2.08964e-09	3.80411e-13	2.55571e-13	8.80386e-13	5.48092e-13	2.83616e-12	2.08552e-11
LNV	5.54469e-10	1.1004e-08	2.44666e-09	3.27537e-09	4.85565e-09	6.98847e-09	1.16157e-10	3.34252e-14	3.44439e-09	5.1558e-11	1.95675e-10	1.13607e-10	1.00259e-08	1.55451e-11	2.58249e-08	2.89319e-06	6.16647e-07	6.44101e-12	2.52401e-10	3.99218e-11	7.86679e-10	3.79551e-12	1.03659e-08	5.09776e-11	1.19311e-10	3.09892e-12	7.23481e-19	1.13622e-10	2.51751e-06	1.13415e-08	2.35955e-09	3.06528e-07	2.65139e-11	2.49421e-11	6.48866e-11	4.94298e-13	5.51432e-11	1.12686e-11	5.26427e-09	3.76195e-10	7.17014e-13	4.39774e-12	1.71269e-08	3.44624e-17	8.74017e-08	9.08508e-11	2.6817e-14	1.06765e-12	3.37505e-07
LP	9.94534e-22	1.30797e-18	4.45152e-22	5.24294e-17	1.49838e-15	8.29851e-17	1.03501e-19	2.25083e-19	5.16277e-23	9.46671e-17	1.28879e-14	1.56933e-17	7.57994e-15	9.73439e-15	2.29244e-14	1.75929e-18	2.35073e-21	1.43213e-22	4.1892e-19	2.67512e-16	6.02434e-22	7.27872e-18	3.52238e-15	2.78139e-17	4.01645e-16	2.23871e-17	4.87243e-17	2.7268e-17	5.59834e-20	1.36546e-18	1.92991e-15	1.03812e-11	6.47832e-22	1.29821e-20	1.58005e-19	2.02883e-17	2.49365e-27	3.15277e-14	1.92883e-18	4.2696e-14	1.39679e-22	6.35647e-18	2.96255e-18	3.14864e-12	2.08116e-15	7.32533e-23	1.48801e-20	2.9779e-21	1.38633e-12
LPD	5.19048e-14	2.45643e-16	7.18382e-14	6.42408e-15	3.6501e-09	1.24436e-17	1.06754e-16	8.35799e-22	6.785e-16	1.38164e-12	2.17693e-18	3.16716e-16	1.7231e-16	7.18439e-15	4.36602e-16	2.42916e-17	2.51614e-18	1.23151e-15	5.06679e-17	2.34102e-15	7.56321e-27	4.23697e-12	8.90982e-18	2.82364e-18	8.40318e-12	1.48123e-15	5.82409e-14	1.32204e-16	3.13433e-15	4.6962e-20	1.39314e-20	1.71061e-12	4.00609e-17	2.12807e-15	1.12642e-16	4.75218e-16	3.07871e-17	1.02831e-18	2.22445e-16	4.03476e-13	3.63276e-12	1.08482e-16	1.77414e-15	6.87393e-15	9.44344e-15	5.09497e-20	2.95017e-15	4.90494e-14	1.94955e-17
LPE	9.87709e-21	2.25715e-21	4.44968e-21	4.26985e-22	2.99164e-23	1.1483e-21	4.1436e-23	3.59221e-24	2.39725e-20	3.86577e-23	5.18706e-22	8.51546e-22	1.00203e-20	1.63321e-22	3.87952e-23	6.65737e-24	3.67302e-27	1.19715e-18	1.67728e-23	1.83306e-19	5.13338e-24	2.23183e-27	5.75869e-24	9.99502e-20	1.59171e-20	3.7462e-17	3.77715e-18	3.85727e-23	2.1821e-23	3.62157e-19	3.18468e-22	2.82934e-18	2.88427e-28	1.56409e-20	1.61579e-19	5.45683e-23	5.0892e-24	1.22556e-20	2.23592e-19	3.9894e-19	3.89285e-21	1.78192e-18	2.71803e-18	1.61537e-21	1.31444e-20	2.26528e-15	8.97992e-28	7.34791e-22	9.50311e-20
LPK	1.30469e-18	1.22746e-20	7.25538e-21	3.90825e-21	6.86071e-23	3.51269e-21	4.50522e-21	4.20725e-22	5.7592e-19	1.81906e-21	7.09658e-17	6.79082e-23	9.40042e-23	9.3718e-23	2.97067e-16	9.91203e-17	1.47736e-23	3.4355e-19	7.9292e-21	4.14825e-15	4.56168e-13	3.46549e-22	4.25592e-16	4.73883e-18	1.64625e-18	2.84595e-16	1.71717e-19	1.8168e-21	1.24077e-17	1.26332e-20	1.13914e-17	1.69746e-18	7.05742e-22	5.49555e-20	1.47404e-19	1.12035e-15	7.92861e-24	3.95699e-22	1.25502e-23	8.84939e-20	6.09078e-21	2.63529e-22	4.39489e-21	4.29689e-20	8.69847e-15	2.32991e-21	3.28201e-24	7.42468e-21	3.44484e-25
LPL	6.03053e-34	1.63699e-29	1.47888e-33	3.32795e-28	5.66344e-22	4.05162e-26	3.57937e-26	4.36101e-29	1.89454e-33	6.46842e-24	2.71205e-22	6.39912e-31	2.29199e-29	4.29788e-30	1.99882e-29	4.53738e-27	4.33219e-30	1.00663e-28	4.86692e-36	7.03228e-24	2.09383e-28	2.58202e-29	4.54615e-26	2.23826e-25	4.55289e-27	9.98246e-26	1.03573e-25	1.04517e-27	3.22472e-26	1.38883e-37	6.71663e-26	2.24358e-27	2.06895e-32	3.84884e-26	1.95834e-28	1.0951e-24	2.87468e-35	1.68604e-28	7.80063e-31	1.02545e-31	4.62241e-28	8.47561e-26	3.96243e-37	8.12424e-25	1.13746e-34	4.83801e-34	4.01886e-30	3.28815e-35	1.12174e-26
LPN	8.28122e-27	2.02172e-19	1.25479e-25	6.48517e-20	1.54226e-17	8.13671e-25	3.66344e-25	2.33783e-19	9.18802e-25	1.03581e-25	2.88009e-20	6.69565e-21	1.83516e-24	1.05641e-23	1.77681e-25	1.60889e-21	9.43454e-24	1.15652e-27	7.00499e-24	4.49365e-21	7.64111e-25	1.60782e-22	1.82076e-22	6.55211e-22	1.08731e-26	7.8057e-22	1.86644e-24	2.89827e-27	1.58834e-23	1.6015e-23	9.59348e-19	1.17401e-20	3.05388e-30	1.74172e-24	6.62071e-28	3.6448e-27	6.83209e-24	1.62034e-21	4.90033e-24	1.34119e-19	1.73719e-26	3.39608e-25	7.82522e-28	4.79039e-20	3.62033e-24	7.79255e-31	9.08456e-24	3.12356e-25	1.78408e-23
LPS	1.83359e-26	4.62371e-23	3.44371e-22	3.95372e-26	4.98925e-28	6.54346e-26	3.81731e-31	2.80944e-23	1.12855e-30	9.45723e-29	9.18116e-32	4.16158e-22	3.24492e-28	4.5342e-26	1.75527e-29	8.34277e-27	3.89742e-25	4.76704e-33	1.06724e-24	1.40309e-30	1.32094e-28	2.54608e-25	3.6173e-21	7.28295e-29	5.9046e-30	4.11489e-27	7.02102e-25	1.10038e-18	2.48637e-21	1.78896e-22	5.00152e-27	2.79137e-22	3.05908e-23	1.62345e-28	2.56474e-27	1.52562e-30	5.6729e-32	7.60412e-23	8.86024e-30	2.45567e-21	2.67864e-26	1.14373e-25	1.41123e-23	5.43295e-26	2.38798e-30	9.4341e-29	2.53174e-26	2.04371e-25	5.5151e-21
LPT	5.40992e-13	3.25964e-13	4.7601e-13	2.25058e-17	2.63291e-11	2.91253e-14	4.23705e-12	2.18112e-14	5.79442e-13	2.32421e-09	8.01336e-11	9.3015e-14	6.76809e-14	2.15116e-10	7.66289e-11	8.95706e-10	3.54487e-09	1.22736e-15	2.0442e-14	1.30915e-08	6.72004e-13	4.94996e-18	1.76878e-14	5.95067e-12	1.6383e-09	8.17012e-13	3.54104e-12	5.16648e-10	2.00232e-15	1.22756e-10	1.7178e-10	3.00835e-11	1.31224e-13	2.43133e-13	1.69018e-13	4.36068e-15	4.82736e-15	1.25364e-07	3.35822e-14	5.57803e-11	5.61743e-12	1.65955e-17	6.35191e-14	4.97825e-13	2.91254e-14	2.94473e-10	2.60258e-13	3.39932e-13	7.13699e-14
LQ	8.44133e-25	6.32564e-29	1.07915e-31	7.16967e-29	9.13538e-18	3.19367e-28	3.07094e-16	4.43139e-24	3.21797e-29	1.11827e-24	1.60596e-26	6.23907e-22	7.51057e-26	4.80642e-27	1.31899e-26	5.42543e-23	2.13017e-22	7.14718e-28	8.01353e-30	9.90073e-26	2.61155e-24	4.45524e-19	1.13023e-21	1.56864e-27	5.63518e-27	5.47967e-26	6.5907e-19	1.45066e-27	9.94017e-29	3.12974e-26	5.07341e-30	1.14256e-28	2.31495e-26	1.49985e-22	1.43782e-26	1.29146e-28	2.44822e-26	3.33475e-30	6.68521e-22	3.39371e-24	1.40696e-22	7.70404e-23	1.07184e-31	1.37069e-26	4.43483e-23	1.96092e-28	6.282e-21	2.277e-23	1.34821e-26
LQE	1.47003e-21	1.44841e-19	1.50779e-24	1.45829e-16	2.33552e-13	1.20987e-20	1.7713e-15	1.16904e-19	1.39542e-24	6.58096e-19	1.32593e-26	7.84146e-19	1.56683e-19	1.79024e-22	7.21695e-23	3.0189e-22	2.42918e-24	1.15426e-20	2.65559e-19	6.60053e-21	2.86739e-19	7.73973e-22	4.1727e-19	5.55109e-21	4.50203e-21	2.12701e-23	1.55295e-18	1.15972e-26	1.91315e-19	8.9432e-22	1.31868e-20	1.18884e-23	1.5174e-20	7.35771e-20	1.38888e-19	1.89001e-27	3.18394e-19	2.11393e-20	2.05622e-21	4.09195e-22	1.38516e-16	6.17459e-17	3.93266e-25	4.12028e-24	7.44773e-23	1.24059e-24	2.09679e-24	8.62753e-21	2.55935e-23
LQG	1.5213e-18	5.78189e-15	1.87622e-13	2.79246e-14	1.56859e-15	1.49777e-14	3.68137e-14	1.48861e-16	1.63315e-13	4.18913e-15	9.97679e-12	3.78698e-15	2.71334e-20	9.25612e-18	7.29305e-12	6.18623e-13	7.40954e-16	5.30721e-22	7.51661e-14	1.43875e-17	1.71504e-18	3.9977e-14	1.58885e-15	5.68605e-14	5.63106e-18	7.83703e-20	5.03708e-15	1.18483e-15	5.98465e-21	1.21605e-18	1.5801e-17	2.37323e-15	7.4416e-19	7.26455e-13	1.85321e-15	3.48429e-11	3.40504e-17	6.41007e-19	5.06845e-17	1.39926e-13	6.38065e-14	8.56662e-15	8.93796e-19	6.55376e-13	4.55047e-20	2.22517e-21	1.91862e-15	6.74549e-18	3.22101e-15
LQI	1.10464e-17	1.33417e-18	1.49153e-18	1.51075e-20	7.13869e-13	2.88172e-19	4.69926e-18	1.7346e-17	2.34066e-21	5.75561e-15	2.76406e-18	1.59912e-12	6.77278e-17	1.92099e-20	2.24118e-19	1.31033e-20	8.7206e-15	1.47033e-16	6.791e-20	2.31699e-18	6.58823e-19	1.17173e-16	3.34826e-13	1.73941e-21	1.29614e-16	1.02111e-19	3.53674e-13	8.88305e-15	5.3375e-18	3.48821e-20	1.6409e-18	5.80335e-23	3.41301e-19	2.36354e-16	3.55934e-16	2.89659e-18	4.77289e-19	1.04298e-13	7.73386e-15	8.1854e-16	2.07123e-14	3.89203e-18	7.6846e-22	9.62808e-17	2.33099e-17	2.65547e-21	2.19837e-18	4.44566e-19	8.55975e-18
LQK	1.03283e-20	8.57428e-22	2.03605e-21	7.91588e-26	1.25618e-14	8.09663e-18	5.68229e-18	7.00622e-18	1.57481e-12	9.58706e-20	1.49022e-19	2.17875e-20	5.06121e-21	1.09866e-22	4.37048e-20	2.25776e-15	6.31746e-18	2.06784e-20	4.52934e-17	3.28163e-16	2.67219e-19	9.19811e-15	2.07586e-20	4.70416e-18	6.28305e-18	3.05107e-17	5.2148e-13	3.06927e-17	2.42491e-18	8.23555e-19	1.99072e-22	1.74466e-20	3.2038e-17	6.43521e-19	1.32892e-16	1.20513e-20	3.74446e-19	9.10685e-18	1.17729e-18	2.81355e-19	3.16918e-18	1.91564e-14	1.25063e-15	3.46663e-23	2.0433e-16	4.37282e-21	4.38998e-17	2.42725e-21	8.36927e-22
LQL	2.33634e-17	6.47334e-19	2.25971e-20	7.93392e-19	2.36726e-17	1.71981e-16	4.44152e-13	2.14415e-16	4.09022e-19	1.11219e-18	1.33975e-19	1.6697e-17	4.4245e-16	1.09024e-15	2.32151e-22	1.48027e-14	1.20485e-16	3.53034e-20	1.71342e-21	2.85144e-18	2.6565e-20	1.03207e-19	1.67293e-21	6.78749e-22	7.91755e-20	1.59973e-20	4.36162e-21	4.88792e-18	1.05006e-16	2.15782e-25	5.35332e-20	2.96052e-18	3.12671e-23	8.38217e-18	2.47774e-20	1.73978e-23	1.6239e-17	1.55815e-17	7.06457e-19	4.6478e-18	1.62649e-15	8.38549e-19	2.83275e-22	2.23024e-20	2.30233e-14	3.92037e-14	3.68368e-21	2.7274e-13	2.93047e-19
LQN	1.98008e-19	2.70709e-17	6.33699e-20	4.00797e-19	1.05519e-14	4.73396e-24	2.39691e-17	6.79636e-15	9.28957e-18	7.3021e-17	9.46563e-16	4.51154e-22	9.8875e-23	7.66323e-14	1.32657e-25	5.93791e-12	4.84883e-15	2.74845e-22	1.69355e-20	2.19116e-16	4.10688e-16	7.34211e-20	8.07773e-16	2.98264e-23	9.46223e-16	3.37544e-18	1.03075e-21	3.54714e-20	5.37492e-17	2.82195e-17	8.01361e-19	1.07018e-18	1.66867e-17	1.47606e-21	2.28544e-19	1.29707e-18	4.10654e-18	1.19082e-18	1.10456e-19	4.49725e-17	1.60209e-17	1.18917e-19	3.39738e-23	2.52829e-24	9.49035e-18	2.27934e-20	1.31652e-20	1.34933e-20	1.13434e-22
LQR	3.30664e-13	3.06883e-12	8.22523e-15	1.02473e-13	1.25503e-09	1.08923e-13	8.63473e-11	6.46307e-15	2.13855e-08	3.51107e-11	1.54986e-11	8.18435e-12	5.08556e-13	1.53696e-16	2.59915e-09	4.01839e-10	8.04111e-13	1.41292e-13	1.11316e-20	1.19432e-14	1.49874e-09	6.52697e-12	3.90958e-12	7.21306e-11	3.66564e-12	4.35077e-09	1.74956e-10	1.95316e-12	6.74109e-12	4.49856e-14	1.65627e-13	1.81989e-13	2.21911e-11	6.01557e-12	2.95973e-12	2.24147e-14	9.25449e-17	9.48357e-12	5.39703e-12	3.25269e-11	6.45689e-16	1.45308e-15	1.38982e-15	4.24427e-14	9.45144e-11	1.23393e-12	8.79112e-10	1.36321e-12	5.89469e-14
LQS	6.82867e-11	1.77749e-14	1.14072e-11	5.39721e-15	4.34984e-15	6.77466e-15	1.65292e-13	1.83594e-10	5.91021e-18	7.00355e-17	2.59846e-19	7.90251e-15	2.05064e-18	3.57548e-17	9.09838e-16	2.06958e-14	7.25019e-13	3.52763e-14	1.72598e-15	1.92374e-15	1.82986e-16	1.30137e-13	6.13427e-16	8.62838e-16	1.39475e-16	1.80709e-12	6.44532e-11	7.26718e-13	1.19557e-14	9.36995e-14	3.68671e-13	5.89142e-12	2.74447e-13	1.33436e-12	4.26505e-09	1.87648e-14	1.16316e-14	5.89042e-16	1.44949e-12	9.21169e-15	2.83576e-13	1.40644e-14	1.26407e-21	1.14861e-14	1.34512e-11	2.93811e-11	7.58611e-13	1.45344e-14	4.76385e-12
LQT	9.61096e-16	4.70188e-14	7.72815e-17	5.02853e-19	6.67725e-14	6.13461e-21	3.64567e-14	7.50864e-18	3.19536e-20	2.45253e-18	4.54256e-18	1.32035e-21	1.61502e-21	1.29102e-17	1.3124e-14	2.32976e-19	3.54438e-19	1.22314e-20	1.26011e-17	2.73638e-18	7.25386e-18	3.74441e-20	1.03146e-14	1.33496e-15	7.15742e-23	6.06665e-21	3.4161e-20	6.58621e-18	2.25502e-17	1.42272e-22	1.84957e-18	2.22274e-19	3.51952e-18	2.12998e-18	2.72117e-19	1.0817e-17	9.65778e-17	1.55251e-18	4.52948e-16	1.33663e-18	3.65162e-19	3.01551e-19	3.82671e-17	2.25659e-16	7.09159e-20	1.08889e-18	1.26246e-16	1.15379e-20	1.98385e-23
LQV	6.05744e-09	2.11914e-11	1.36403e-11	2.33984e-11	2.60986e-10	6.50809e-15	1.13509e-09	1.77119e-12	4.26648e-12	6.89929e-12	1.99051e-08	9.03138e-11	2.24241e-12	6.86218e-09	1.02775e-11	1.22612e-07	2.47326e-12	1.57803e-09	1.01794e-10	2.18479e-10	6.50773e-10	2.41803e-10	5.61198e-11	1.94905e-12	3.41393e-09	3.80341e-13	4.24837e-10	2.9365e-08	8.90704e-09	6.7396e-15	1.89624e-09	1.97517e-10	1.08434e-11	2.11767e-12	6.59135e-10	4.73807e-12	5.49903e-12	7.00668e-11	1.58053e-10	9.77322e-10	5.96756e-10	2.51611e-11	1.79166e-12	3.25715e-13	1.74604e-13	9.09862e-10	4.38209e-11	1.17702e-09	9.35812e-12
LQY	2.05115e-10	2.54222e-12	2.25109e-14	4.46485e-11	1.99057e-13	5.98308e-11	1.8531e-09	2.33518e-12	2.50082e-10	4.46414e-09	8.79436e-14	2.42751e-06	5.60196e-15	6.24532e-11	1.68199e-08	5.21368e-09	3.28548e-11	3.63997e-11	4.24342e-13	1.62677e-10	1.12962e-10	2.89707e-08	1.09538e-09	7.56428e-11	8.32353e-09	7.35217e-13	7.23659e-12	2.67999e-11	7.27495e-11	8.2399e-12	2.58455e-11	8.73699e-14	6.09509e-12	8.08945e-13	3.78832e-16	9.14208e-13	2.59411e-12	4.8667e-10	2.60494e-13	3.92353e-10	1.17119e-09	7.42425e-12	1.52731e-11	6.83934e-10	4.96812e-15	7.78331e-12	2.37798e-10	1.0457e-09	2.21365e-11
LR	1.71294e-23	5.76208e-27	3.73028e-26	1.70607e-21	1.49515e-25	2.46258e-24	2.74238e-20	5.66346e-26	1.18623e-29	1.28181e-25	1.11508e-26	2.12498e-27	1.00836e-23	3.83099e-24	1.12582e-27	1.22061e-23	1.96582e-26	6.42945e-23	6.01893e-25	1.98878e-25	1.04686e-28	1.70985e-23	1.58448e-26	5.1149e-21	1.68951e-26	1.32313e-31	7.83874e-30	3.14003e-23	4.3521e-23	1.53739e-27	7.11042e-28	1.8861e-26	6.88453e-29	2.45482e-21	2.59419e-26	3.1621e-21	1.10156e-22	2.20028e-30	4.91567e-23	2.97381e-30	2.349e-24	4.18595e-20	1.12286e-25	4.94729e-24	8.06438e-26	3.23007e-23	1.54015e-26	7.88129e-20	2.91751e-23
LRD	4.5166e-14	7.54719e-17	3.33838e-16	2.73288e-09	1.36046e-15	1.18112e-08	9.59553e-08	4.84991e-14	2.26515e-15	2.35519e-11	3.82652e-14	2.84595e-16	2.91417e-12	7.02411e-12	1.72424e-13	5.26205e-11	5.83774e-15	3.24136e-14	1.47708e-11	1.53278e-09	9.64362e-10	2.34805e-12	9.10448e-12	1.23287e-11	1.20548e-12	1.7168e-15	9.35938e-13	7.3887e-14	4.2752e-12	2.4767e-14	3.55029e-12	4.12334e-14	1.5338e-15	1.79567e-13	3.94649e-09	2.05793e-09	2.16048e-15	3.18531e-17	2.25088e-14	1.93672e-09	2.38151e-14	5.99224e-15	1.09678e-15	9.52475e-13	2.38758e-16	6.24672e-15	6.56248e-15	6.55992e-11	9.41189e-10
LRE	3.12415e-18	3.79178e-20	3.55553e-20	5.57945e-16	1.02906e-14	3.92239e-22	6.28924e-18	5.13927e-16	2.20469e-18	4.56504e-18	7.46057e-17	2.3984e-17	4.02749e-19	1.82497e-15	1.92114e-17	1.81924e-16	7.35327e-17	1.13381e-17	3.11e-16	2.11103e-16	4.97336e-18	1.05749e-17	1.91206e-18	2.1739e-23	1.17682e-19	9.0494e-20	7.54596e-13	1.39848e-12	1.0423e-19	1.95637e-20	1.13888e-18	7.14699e-24	1.35415e-21	4.72366e-14	3.48919e-22	3.40312e-19	2.0013e-20	2.61766e-20	9.46851e-20	1.08978e-16	2.0525e-20	5.97758e-22	5.20816e-20	1.33225e-19	2.73556e-19	6.74674e-13	9.60747e-16	2.19754e-14	8.86246e-17
LRF	5.32221e-17	1.96758e-15	3.97422e-11	1.96063e-11	5.44974e-13	7.84714e-12	2.15207e-11	8.6662e-12	6.85992e-14	2.18344e-13	2.53161e-18	4.65337e-14	9.98234e-12	4.20595e-13	7.09877e-15	1.63707e-08	5.48935e-11	2.77194e-12	1.39115e-15	2.43314e-13	1.40911e-13	1.49685e-15	2.43773e-11	1.22952e-11	6.79032e-10	6.2002e-15	3.01929e-13	5.36622e-15	2.4551e-10	5.32288e-14	3.76674e-12	2.08368e-14	3.43549e-15	2.3571e-12	1.41133e-16	1.17253e-09	8.16268e-15	2.41536e-11	2.52165e-15	1.46077e-15	5.38409e-15	2.19395e-09	4.33468e-16	2.86819e-11	6.74744e-11	4.71941e-14	1.14139e-13	1.0359e-13	1.52235e-15
LRG	3.07789e-23	1.30807e-19	1.33141e-21	7.13654e-18	6.94404e-20	3.46025e-22	3.53219e-19	1.00473e-22	1.33242e-20	3.56065e-23	5.23943e-20	7.44033e-19	8.15211e-20	5.15121e-21	7.36123e-20	5.26414e-22	3.17656e-18	9.26356e-21	1.1628e-19	1.01587e-19	4.29516e-13	1.54442e-20	7.86412e-24	9.04684e-26	1.71602e-25	9.72671e-24	3.22974e-20	1.91792e-22	2.415e-21	2.59315e-25	7.90675e-23	3.06704e-18	4.3931e-28	8.53538e-26	5.13435e-24	4.13641e-24	9.22762e-26	8.68522e-23	1.52732e-23	4.80475e-20	6.18225e-21	3.71006e-19	4.30363e-21	1.60437e-20	3.09612e-18	9.48556e-24	5.08899e-23	5.68897e-22	3.20604e-15
LRH	3.01164e-17	2.05682e-18	9.14274e-18	5.73729e-18	1.06869e-15	6.22217e-17	4.90614e-20	3.19634e-19	3.68879e-18	1.46063e-18	2.11513e-18	1.32251e-14	1.04818e-19	1.08161e-22	1.01369e-20	7.18667e-19	1.97296e-22	2.85554e-21	1.9098e-15	2.54653e-22	2.96065e-12	6.10369e-24	3.56304e-22	1.26772e-13	1.26133e-19	5.78628e-18	1.0605e-20	2.6739e-19	6.15182e-17	3.14755e-17	3.09319e-17	3.19607e-17	2.78484e-18	3.40153e-20	1.2094e-14	2.21484e-14	1.80533e-16	7.25314e-17	1.93009e-16	1.1238e-17	8.58859e-17	4.97609e-17	5.85596e-17	1.71725e-15	2.51996e-16	2.02476e-17	8.1444e-20	1.04647e-15	4.37562e-16
LRI	1.25874e-23	2.3844e-20	9.06595e-23	3.72759e-22	1.69089e-24	2.11526e-26	4.31853e-18	4.63139e-24	2.1603e-23	1.26414e-26	5.54904e-18	5.75071e-26	5.84088e-22	2.62415e-21	1.58929e-25	1.49935e-22	1.47337e-25	4.74745e-24	2.54285e-25	3.70521e-29	4.67533e-23	3.91764e-24	1.39192e-21	5.72844e-23	8.01941e-27	2.07543e-24	2.29117e-23	6.2098e-25	4.83664e-23	1.49433e-26	1.51273e-24	1.41248e-20	1.2103e-19	3.87353e-22	3.3274e-26	4.64723e-22	3.47876e-21	5.52741e-26	1.46403e-23	1.38402e-19	8.72122e-22	6.37827e-19	1.91623e-20	3.63032e-20	5.03956e-25	6.15956e-19	1.82337e-26	6.6739e-21	1.83755e-25
LRK	3.81335e-18	1.6736e-17	1.01364e-18	4.4725e-16	3.51516e-13	7.81877e-17	4.89962e-19	1.14024e-12	4.78297e-17	7.07781e-21	7.57377e-15	1.34785e-19	1.94793e-15	7.25882e-18	2.50582e-18	9.20013e-17	3.35101e-16	3.50567e-17	4.60279e-16	4.61991e-18	2.64298e-21	1.64825e-20	3.72204e-19	8.11793e-23	1.46362e-18	1.61087e-18	5.24295e-17	1.59744e-16	1.33937e-16	1.36451e-14	6.15303e-19	2.13781e-17	8.09955e-19	6.15348e-18	3.68856e-23	4.93993e-16	1.15487e-18	1.67494e-15	8.63097e-18	4.00613e-15	2.21523e-16	9.81699e-23	6.11899e-19	3.24463e-17	3.30665e-16	2.76783e-17	3.36814e-12	3.41411e-16	3.89879e-18
LRL	1.44298e-14	5.17421e-19	2.6179e-19	1.67625e-17	7.14259e-17	7.98985e-16	2.44781e-16	1.44448e-26	9.78001e-18	3.19226e-17	1.4712e-19	4.05345e-22	1.70749e-13	1.18853e-18	1.14144e-12	4.99737e-12	1.51015e-17	4.95197e-19	1.08065e-17	1.75388e-13	3.56711e-16	3.18407e-20	1.00625e-16	2.50482e-17	2.62901e-15	5.52822e-16	1.09513e-19	8.0001e-12	1.19345e-17	9.89357e-19	1.28459e-19	7.86853e-17	2.42396e-14	1.25519e-14	2.01029e-18	4.6247e-21	1.0017e-14	4.377e-19	1.15659e-15	8.36884e-19	2.67415e-15	3.25492e-16	2.73778e-20	6.24732e-15	2.12705e-19	2.43215e-17	6.94406e-26	3.0884e-18	1.6657e-16
LRN	6.8592e-17	6.50185e-17	1.40346e-17	8.49607e-16	5.09403e-22	2.05801e-15	7.88816e-16	5.55983e-17	2.54372e-18	9.69338e-20	5.28098e-15	6.82308e-16	2.40795e-22	1.83484e-15	6.25353e-15	1.93268e-17	1.54926e-18	2.69628e-20	1.64496e-18	2.29922e-16	2.3409e-21	3.77748e-15	1.65643e-15	2.92494e-16	3.3373e-23	3.84829e-22	7.61036e-16	2.09906e-14	1.78444e-15	2.37657e-19	2.10334e-15	3.53697e-20	2.55501e-22	4.08198e-14	1.31791e-15	3.76897e-16	2.44357e-16	4.46046e-16	4.95849e-14	1.20873e-16	5.14359e-18	7.53497e-19	4.62067e-23	1.5916e-19	6.48969e-20	2.81391e-13	2.10393e-15	6.80751e-18	8.52886e-20
LRS	2.72512e-15	1.82855e-20	6.71596e-16	2.35767e-19	8.27039e-19	8.07364e-21	1.5774e-15	6.31727e-21	6.66845e-17	9.95112e-21	3.54514e-19	1.39421e-16	2.27738e-16	1.0688e-18	6.82843e-21	6.19095e-12	3.41511e-20	2.96979e-17	6.12617e-16	7.19177e-21	1.50412e-20	8.46041e-20	5.51875e-20	1.30525e-18	1.85993e-23	5.79522e-15	7.47972e-28	1.26643e-17	2.0209e-21	7.9735e-18	2.74209e-18	9.64473e-17	2.35146e-18	1.10127e-17	5.5722e-14	3.7095e-17	8.53558e-17	6.7081e-15	5.63991e-20	1.71571e-15	1.6451e-20	4.67051e-11	3.57309e-14	1.82629e-22	9.18837e-22	8.37157e-23	6.0819e-22	6.07206e-21	9.92858e-22
LRT	5.44018e-14	2.22766e-15	1.02878e-13	1.25562e-15	3.95861e-19	1.73458e-12	1.70875e-11	1.32319e-15	1.47497e-16	3.20089e-14	9.01486e-13	1.6363e-15	2.01521e-17	9.27163e-13	8.71143e-16	3.37518e-12	1.00047e-16	1.35588e-13	1.73341e-14	8.92549e-11	2.617e-14	1.71647e-13	7.91633e-15	1.18038e-14	3.98725e-15	4.22084e-11	1.97633e-15	4.60043e-10	6.71833e-15	2.53618e-22	4.84973e-12	1.9605e-13	8.49317e-13	1.76485e-08	3.29212e-15	4.45961e-13	2.14237e-16	7.42147e-15	3.69484e-18	1.4836e-12	2.47406e-11	3.9294e-14	9.69375e-17	8.96454e-16	1.76304e-14	2.7422e-12	3.56463e-13	9.53807e-13	1.73193e-12
LRV	9.15984e-34	1.96111e-27	8.37855e-33	1.09356e-26	2.85179e-25	3.92622e-25	2.63344e-30	2.22563e-26	1.08544e-33	4.43354e-25	7.3132e-24	5.91972e-30	3.15674e-25	4.12931e-31	4.12684e-27	5.04235e-29	2.84675e-32	1.42597e-24	1.90944e-32	3.4001e-25	4.27163e-36	3.67249e-33	7.73856e-33	2.20891e-23	1.90404e-22	4.68305e-32	1.85124e-27	2.03366e-31	8.65009e-30	9.80883e-32	6.7394e-29	2.19016e-27	7.29145e-35	5.79693e-25	1.45151e-28	1.7395e-27	7.18974e-39	3.1865e-32	1.56243e-27	1.59245e-27	1.12722e-25	3.27088e-24	6.14931e-30	1.38704e-22	1.74178e-27	2.10758e-32	5.5068e-31	1.00459e-27	1.88623e-29
LRY	8.52029e-39	1.0787e-40	2.86301e-35	1.79159e-39	6.53323e-36	2.07319e-38	2.40152e-36	5.63542e-40	1.61122e-36	1.27125e-39	3.11413e-36	5.95302e-35	6.4141e-34	1.20911e-33	7.81597e-32	5.70527e-36	8.38821e-39	1.01986e-35	3.45012e-39	5.03345e-35	3.07921e-37	2.21178e-41	1.64029e-37	1.45774e-33	1.66948e-39	1.1521e-38	9.15072e-38	4.44728e-40	2.55177e-33	1.22509e-39	1.32013e-38	2.58167e-37	1.05471e-38	1.99901e-35	5.176e-42	6.20188e-34	1.5627e-41	1.90329e-40	8.65188e-43	1.44011e-35	4.64876e-34	2.50409e-37	2.96388e-35	1.52064e-36	2.08821e-30	1.90587e-34	4.11957e-37	3.83348e-39	5.74797e-36
LS	8.81241e-36	6.79645e-33	2.14689e-28	1.09617e-33	9.57898e-34	8.81959e-30	6.34263e-30	1.81272e-30	4.15286e-31	1.23328e-29	3.43277e-31	2.65101e-34	1.17405e-32	1.24247e-30	3.49752e-29	1.44138e-30	2.89944e-32	4.94076e-34	8.64466e-36	3.83937e-30	5.41368e-35	3.13569e-32	1.03532e-30	6.57478e-36	5.21204e-38	3.12079e-27	2.49513e-25	5.35668e-30	6.58293e-36	3.58115e-34	1.46519e-27	1.26889e-30	1.64487e-36	2.10137e-31	3.29917e-34	2.50775e-35	1.7136e-36	4.62825e-31	3.65271e-32	8.82746e-34	4.74509e-34	3.91182e-30	1.37894e-30	4.15593e-28	2.18547e-34	1.92194e-31	9.16652e-32	1.07684e-29	8.16987e-31
LSD	2.4548e-12	3.66281e-13	7.16429e-12	6.49528e-10	2.83718e-08	3.28137e-08	8.41198e-14	1.01707e-12	1.59116e-10	3.05979e-13	2.96582e-11	1.0023e-11	2.87977e-12	4.27817e-13	5.81675e-10	2.52348e-08	7.90307e-12	4.63308e-13	1.23216e-09	3.71437e-11	4.27946e-11	2.74267e-11	8.52391e-13	3.22562e-16	9.95447e-15	3.11345e-09	5.58747e-08	4.32005e-14	4.711e-11	3.47137e-11	3.33347e-12	2.94361e-14	2.45919e-12	6.72462e-11	1.67662e-13	2.76509e-09	3.7774e-14	5.70483e-10	1.43808e-15	4.99346e-11	1.64703e-14	1.6609e-14	6.94e-13	5.91986e-12	4.68968e-10	8.19228e-11	1.25001e-10	1.70853e-08	2.33835e-16
LSE	1.32738e-16	4.83174e-15	1.64515e-18	9.08992e-15	5.30961e-19	4.53654e-15	2.45473e-13	1.97966e-17	6.41093e-20	5.83894e-20	4.28059e-14	1.08848e-16	3.26731e-17	5.78464e-16	9.60351e-18	2.98335e-15	1.17682e-13	1.9851e-18	9.38594e-20	2.23861e-15	4.15122e-18	6.16789e-18	1.69832e-20	5.85113e-21	5.59619e-18	5.62241e-18	7.35932e-18	6.60045e-15	1.09248e-16	1.34985e-19	1.0436e-12	3.30237e-15	1.08068e-20	1.83281e-13	2.43878e-16	1.41669e-15	3.41761e-12	1.41204e-21	1.4322e-15	1.50657e-15	4.48301e-18	2.64881e-17	2.89785e-16	1.86235e-16	1.56093e-17	2.78876e-15	2.30749e-18	5.06693e-17	5.82637e-18
LSF	1.59581e-18	9.63822e-12	3.26289e-14	1.2837e-18	1.80771e-13	9.22785e-14	1.14987e-17	5.53157e-17	6.25497e-23	7.21405e-16	5.94301e-16	5.98064e-20	6.04431e-16	4.22831e-14	3.94759e-16	4.14549e-14	1.58003e-13	1.96236e-15	1.23086e-14	3.79799e-12	4.06936e-11	4.03636e-13	8.92816e-19	1.79137e-14	1.13636e-16	6.74224e-13	8.48417e-14	1.5936e-12	5.74479e-15	8.77221e-12	2.80827e-13	1.17758e-10	4.81371e-15	1.14118e-13	5.09729e-17	5.88396e-18	8.09046e-15	1.42478e-11	1.96442e-16	8.07399e-14	6.54045e-19	1.75871e-18	3.61379e-18	4.38388e-18	1.20598e-13	2.87828e-14	2.28109e-16	2.98366e-11	4.54095e-13
LSG	5.7667e-29	8.5914e-30	1.12596e-23	9.15716e-24	1.15959e-25	2.3497e-28	1.36759e-26	7.09632e-20	7.9536e-28	1.19686e-21	1.256e-26	7.57118e-27	4.47098e-28	3.28477e-28	2.27884e-29	3.98474e-19	3.4331e-25	4.06381e-26	1.55976e-26	3.64646e-21	8.14408e-28	5.46553e-27	2.24809e-28	9.44712e-25	3.44205e-24	4.02972e-29	1.07885e-27	4.66437e-24	2.16973e-23	1.46112e-23	2.98824e-18	1.41122e-29	8.16729e-27	9.68672e-27	3.07025e-33	5.71308e-26	4.36324e-30	6.0939e-22	6.4977e-23	1.18496e-25	9.4503e-17	2.87271e-22	5.48492e-30	4.0394e-30	3.41036e-27	3.22352e-25	4.30666e-23	2.97986e-27	4.91607e-20
LSH	2.42714e-25	2.60284e-17	5.87075e-21	1.36883e-18	4.83422e-20	1.25461e-18	6.3189e-19	1.92312e-17	2.78531e-18	9.64372e-16	9.01196e-21	3.05456e-19	2.57677e-22	3.49378e-21	1.39147e-25	3.24239e-18	2.87147e-14	6.02283e-17	3.70822e-22	2.64796e-18	9.0196e-19	7.35682e-18	2.99083e-23	6.4039e-20	1.38377e-18	5.22739e-22	3.16747e-17	1.74618e-17	2.38846e-16	8.30078e-20	1.23476e-21	1.56733e-18	3.76245e-21	9.99965e-17	5.47134e-17	2.1909e-20	5.33679e-20	8.28283e-17	4.19313e-21	1.05884e-19	2.51914e-23	1.59708e-19	8.90817e-20	1.63865e-15	5.05736e-24	6.22631e-23	1.18786e-19	1.23555e-20	1.65228e-18
LSI	6.10386e-27	8.5001e-22	1.63168e-26	1.66391e-27	1.58606e-28	2.94959e-31	6.73097e-30	1.36574e-23	1.09935e-27	8.48317e-27	6.64483e-25	2.82124e-23	1.33262e-27	9.07989e-34	1.42966e-23	1.42882e-26	9.71217e-30	1.82977e-30	1.50797e-33	2.22621e-28	7.17182e-29	7.06753e-29	7.06092e-26	1.51844e-22	6.18761e-29	1.50902e-28	4.3647e-26	5.81548e-21	4.50077e-27	4.82258e-29	3.03627e-27	4.77904e-25	1.04668e-23	1.95984e-29	1.92364e-32	1.82975e-27	3.45287e-30	5.62859e-27	2.91633e-25	1.79255e-24	1.86745e-34	2.65936e-23	5.26306e-26	4.50882e-25	4.35234e-22	1.89984e-22	4.49408e-30	1.44556e-29	2.55866e-28
LSK	1.30674e-20	5.16063e-27	1.55408e-26	5.05428e-25	8.70856e-25	5.6363e-21	1.85467e-18	1.11067e-24	2.41389e-20	1.17053e-28	1.05178e-26	4.09737e-27	5.74955e-20	1.14106e-20	1.24078e-23	1.18124e-19	5.37951e-26	7.82544e-27	3.65803e-23	1.5719e-24	6.38113e-20	1.12749e-22	1.6056e-23	1.32199e-25	8.92335e-25	6.31283e-25	4.63476e-19	6.49807e-22	7.32184e-28	7.32765e-28	2.35191e-26	1.02878e-25	6.60549e-30	7.95859e-26	1.14045e-21	2.84949e-24	2.30809e-32	1.10363e-28	1.08985e-24	1.65277e-22	1.93632e-20	1.953e-23	4.46612e-32	1.74121e-22	1.38187e-23	3.67455e-26	6.92972e-26	1.52981e-20	1.8053e-23
LSL	5.76579e-24	1.14138e-28	2.36217e-23	7.08491e-26	5.24624e-21	9.12459e-26	2.49505e-28	5.00616e-22	3.43932e-19	1.91646e-20	5.02252e-29	4.44515e-31	3.17634e-24	7.36055e-26	1.27833e-24	6.09938e-27	9.4829e-25	7.17253e-28	4.50133e-29	5.53975e-25	3.67304e-25	1.62047e-27	2.34035e-25	1.25085e-31	8.72779e-31	2.55895e-22	7.20379e-20	6.20772e-23	3.30863e-27	1.3182e-23	2.25831e-23	1.74032e-22	5.44064e-30	2.03143e-23	2.86978e-29	1.44139e-28	1.54425e-28	1.32065e-23	6.25829e-21	2.1135e-24	9.75153e-26	2.63875e-26	1.45379e-28	1.2307e-19	1.48776e-33	1.05088e-23	5.4263e-22	6.81548e-25	5.86879e-22
LSN	1.10737e-28	2.38005e-29	2.81034e-25	3.07988e-23	1.531e-26	5.07061e-28	4.28275e-26	7.17689e-26	1.73095e-26	3.00152e-23	9.58894e-21	7.57056e-26	4.97001e-30	1.31124e-28	1.58755e-23	3.9374e-21	2.8966e-29	1.09615e-29	3.41051e-19	1.51478e-20	9.13672e-26	1.28087e-30	1.14917e-24	3.98732e-31	2.28816e-24	2.78312e-23	7.48985e-24	1.71813e-23	2.08829e-27	6.52479e-25	4.21472e-25	9.24058e-29	1.67082e-26	8.422e-23	3.42862e-27	1.54505e-27	9.60511e-24	6.06382e-26	4.62672e-30	8.34388e-21	4.29742e-26	2.874e-27	8.82768e-27	1.26491e-30	1.66503e-24	1.33093e-22	1.12464e-20	8.95295e-29	2.35185e-27
LSQ	6.1182e-14	1.16812e-10	6.45162e-13	8.6519e-14	3.12765e-10	1.67665e-12	5.90121e-13	1.28894e-11	1.40612e-12	1.88949e-15	3.13007e-08	5.91873e-15	4.6026e-12	1.06836e-10	2.29673e-12	3.95498e-12	3.12462e-11	3.32084e-15	2.03542e-15	7.5759e-10	1.78772e-10	1.63789e-12	1.93843e-12	4.55453e-12	6.27567e-10	6.59642e-11	2.83292e-09	6.97484e-13	1.17964e-11	4.06365e-14	6.99744e-11	3.36245e-10	7.7803e-13	2.4077e-12	4.68173e-16	3.86081e-13	2.0422e-11	8.88448e-11	1.04717e-14	2.84743e-13	8.68433e-12	3.66198e-11	1.07958e-13	1.11541e-12	1.0162e-11	5.35117e-14	1.97723e-11	4.92359e-12	1.77158e-14
LSR	2.02851e-13	9.1322e-10	1.82397e-12	1.18349e-12	1.32136e-12	7.14479e-17	3.23732e-12	1.94734e-13	1.01387e-13	1.03594e-13	3.54928e-12	4.11129e-13	1.12291e-15	1.54929e-13	3.92403e-14	1.9631e-14	6.3902e-15	8.13935e-13	3.33158e-12	1.64345e-14	3.4326e-12	1.68402e-13	3.47004e-12	3.9038e-16	2.7922e-14	2.34248e-12	1.2499e-09	2.0369e-07	3.65297e-11	3.928e-15	2.17514e-09	1.7225e-13	3.84846e-12	1.60092e-16	8.43563e-13	1.05392e-12	1.21855e-16	4.74193e-11	9.98305e-16	5.28121e-14	3.01987e-11	2.84805e-09	3.43392e-15	1.792e-09	1.35238e-13	1.23271e-10	3.07632e-19	5.94458e-15	2.42458e-13
LSS	1.34282e-20	1.96947e-11	1.36005e-17	1.82422e-21	5.57531e-16	9.68937e-21	1.79663e-17	2.94764e-16	2.01108e-15	8.75238e-12	4.04332e-15	2.72894e-13	4.1116e-18	2.1315e-14	2.15248e-17	4.28404e-17	1.57304e-17	6.51665e-18	7.68071e-21	7.43821e-14	2.6441e-17	2.44339e-14	4.20819e-11	1.6301e-18	1.42098e-18	3.3758e-10	2.71221e-15	6.20365e-17	5.5129e-17	2.18256e-19	1.62763e-13	6.65845e-23	8.02319e-20	1.93742e-14	8.6804e-19	3.32357e-16	4.07772e-24	7.71846e-18	5.84396e-16	1.41713e-16	8.60858e-19	7.75864e-12	4.60757e-11	4.17073e-14	1.1121e-16	1.51389e-17	2.0347e-15	1.30159e-13	6.81327e-17
LSV	2.76779e-13	4.30084e-11	3.00631e-14	1.38618e-12	7.11723e-13	8.30911e-15	5.54444e-21	6.82563e-16	1.08911e-14	8.87468e-14	1.71668e-14	2.02777e-19	1.09819e-15	1.60342e-14	4.86815e-14	2.09631e-11	1.66584e-16	3.16443e-13	2.09872e-12	6.3814e-12	3.29783e-11	1.46071e-15	2.27463e-11	1.07343e-11	6.45327e-15	1.43107e-10	2.6883e-17	1.96476e-13	4.92054e-15	6.96877e-18	1.43533e-12	2.3921e-15	3.10754e-12	5.51862e-11	2.40895e-14	1.33097e-12	2.91857e-15	1.77199e-12	2.20173e-11	4.34146e-08	5.32515e-14	1.31685e-20	2.85735e-16	5.70057e-15	3.27836e-13	4.49066e-14	7.44101e-17	3.50794e-14	2.50045e-14
LSY	8.419e-48	3.37437e-42	5.37144e-42	3.16345e-47	1.87387e-41	3.81033e-38	1.64522e-46	2.00806e-48	1.22113e-41	1.02235e-50	2.68437e-48	1.46667e-43	1.24548e-43	1.34933e-48	2.37019e-43	1.82909e-43	3.09715e-48	3.07926e-47	2.52813e-43	1.11287e-41	9.68134e-45	4.12881e-45	2.86631e-40	7.77574e-48	2.64999e-45	1.27625e-47	7.96202e-35	3.1617e-49	1.26973e-42	6.00184e-46	3.4681e-39	1.69227e-47	9.8955e-52	2.55679e-38	2.31299e-45	1.73658e-43	1.92231e-44	9.05753e-42	3.77203e-46	1.14689e-45	6.29617e-42	4.65308e-46	8.806e-47	1.06967e-42	9.19289e-47	1.03244e-39	5.59316e-48	1.50595e-47	4.19126e-42
LT	3.18482e-26	3.81694e-26	1.60601e-25	7.45501e-23	1.98578e-25	2.10206e-29	1.79952e-26	6.20656e-28	4.46734e-30	4.54202e-28	4.29455e-24	1.67755e-30	8.42354e-21	1.54256e-29	3.11709e-26	9.75172e-26	2.8323e-27	4.60168e-24	1.13466e-25	9.50624e-28	4.02712e-24	1.60576e-34	4.56854e-22	4.61207e-28	1.60237e-30	3.59672e-33	3.84233e-30	4.46401e-22	3.02125e-28	5.39522e-28	2.37408e-24	1.07299e-29	1.9845e-29	2.15461e-30	3.81352e-28	5.14477e-27	4.68729e-24	4.12032e-32	2.83026e-27	8.93047e-26	3.90014e-29	2.1157e-22	3.04095e-22	1.58179e-27	1.26336e-28	2.35818e-23	5.99354e-27	1.85189e-29	1.39964e-31
[truncated: 464 more rows]
[truncated: 51 more columns]
