# Supplementary material for: RFPDR: a random forest approach for plant disease resistance protein prediction
Source: PeerJ. 2022 Apr 22;10:e11683. doi: 10.7717/peerj.11683 (PMC9037127; doi:10.7717/peerj.11683)
Supplement: Supplemental Information 4 — FD-RFPDR (positive:negative ratio 1:1): The 5% top features are presented (percImp: percentage of Importance; cumsum: cumulative sum) In bold, the most important features in FD-RFPDR, which account for 50% cumulative importance. In bold+italic, top 1% features. RD-RFPDR (positive:negative ratio 1:1): The most important features in RD-RFPDR, which account for 50% cumulative importance are presented (percImp: percentage of Importance; cumsum: cumulative sum) In bold, the to 5% features. In bold+italic, top 1% features. Feature names and categories are those described in the prot R Package (Xiao et al., 2015, https://cran.r-project.org/web/packages/protr/vignettes/protr.html). [file peerj-10-11683-s004.xlsx]

## Sheet: FD-RFPDR (1_1)
Supplementary table S3 (a). Mean Gini importance of features in the Full-Dimention model (FD-RFPDR)
The 5% top features are presented (percImp: percentage of Importance; cumsum: cumulative sum)
In bold, the most important features in FD-RFPDR, which account for 50% cumulative importance. In bold+itallic, top 1% features
Feature	percImp	cumsum	Feature Category	Feature description
prop6.G1.residue0	1.31	1.31	Distribution	First residue secondary structure: Helix (i.e., E, A, L, M, Q, K, R, H)
prop2.G3.residue0	1.22	2.54	Distribution	First residue normalized van der Waals volume ~ 4.03-8.08 (i.e., M, H, K, F, R, Y, W)
length	1.18	3.72	Sequence length	Sequence length (in amino acids)
prop4.G3.residue0	1.16	4.88	Distribution	First residue polarizability ~ 0.219-0.409 (i.e., K, M, H, F, R, Y, W)
prop7.G3.residue0	1.16	6.04	Distribution	First residue solvent accessibility: Intermediate (i.e., M, S, P, T, H, Y)
prop1.G3.residue0	1.16	7.2	Distribution	First residue hydrophobicity: Negative (i.e., D, E)
prop5.G2.residue0	1.08	8.27	Distribution	First residue charge: Neutral (i.e., A, N, C, Q, G, H, I, L, M, F, P, S, T, W, Y, V)
prop3.G1.residue0	1	9.27	Distribution	First residue polarity ~ 4.9-6.2 (i.e., L, I, F, W, C, M, V, Y)
prop2.G1.residue0	0.83	10.1	Distribution	First residue normalized van der Waals volume ~ 0-2.78 (i.e., G, A, S, T, P, D, C)
prop7.G1.residue0	0.79	10.89	Distribution	First residue solvent accessibility: Buried (i.e., A, L, F, C, G, I, V, W)
prop1.Tr1331	0.77	11.66	Transition	Hydrophobicity: Polar <-> Hydrophobic (i.e., {R, K, E, D, Q, N} <-> {C, L, V, I, M, F, W})
prop4.G1.residue0	0.77	12.43	Distribution	First residue polarizability ~ 0-1.08 (i.e., G, A, S, D, T)
prop3.Tr1331	0.77	13.2	Transition	Polarity: 4.9-6.2 <-> 10.4-13.0 (i.e., {L, I, F, W, C, M, V, Y} <-> {H, Q, R, K, N, E, D})
L	0.76	13.96	Amino acid	Relative frequency
GKT	0.74	14.71	Tripeptide	Relative frequency
CIDH920105.lag1	0.68	15.39	Normalized Moreau-Broto	Property: normalized average hydrophobicity scales; lag 1
prop3.G2.residue0	0.68	16.07	Distribution	First residue polarity ~ 8.0-9.2 (i.e., P, A, T, G, S)
prop1.G2.residue0	0.68	16.75	Distribution	First residue hydrophobicity: Neutral (i.e., A, N, C, Q, G, H, I, L, M, F, P, S, T, W, Y, V)
KTT	0.62	17.37	Tripeptide	Relative frequency
normwaalsvolume.Group2	0.6	17.97	Composition	Normalized van der Waals volume ~ 2.95-4.0 (i.e., N, V, E, Q, I, L)
CIDH920105.lag2	0.52	18.49	Normalized Moreau-Broto	Property: normalized average hydrophobicity scales; lag 2
NLK	0.47	18.95	Tripeptide	Relative frequency
LSY	0.46	19.42	Tripeptide	Relative frequency
VLD	0.45	19.87	Tripeptide	Relative frequency
NL	0.45	20.31	Dipeptide	Relative frequency
prop7.G2.residue0	0.41	20.72	Distribution	First residue solvent accessibility: Exposed (i.e., R, K, Q, E, N, D)
prop6.G2.residue0	0.41	21.13	Distribution	First residue secondary structure: Strand (i.e., V, I, Y, C, W, F, T)
prop7.Tr1221	0.41	21.54	Transition	Solvent accessibility: Buried <-> Exposed (i.e., {A, L, F, C, G, I, V, W} <-> {R, K, Q, E, N, D})
prop4.G2.residue0	0.4	21.94	Distribution	First residue polarizability ~ 0.128-0.186 (i.e., C, P, N, V, E, Q, I, L)
polarity.Group1	0.4	22.34	Composition	Polarity ~ 4.9-6.2 (i.e., L, I, F, W, C, M, V, Y)
hydrophobicity.Group3	0.4	22.74	Composition	Hydrophobicity: Hydrophobic (i.e., C, L, V, I, M, F, W)
IGK	0.4	23.14	Tripeptide	Relative frequency
TTR	0.4	23.53	Tripeptide	Relative frequency
KL	0.38	23.91	Dipeptide	Relative frequency
prop3.G3.residue0	0.37	24.28	Distribution	First residue polarity ~ 10.4-13.0 (i.e., H, Q, R, K, N, E, D)
polarizability.Group2	0.37	24.65	Composition	Polarizability ~ 0.128-0.186 (i.e., C, P, N, V, E, Q, I, L)
prop1.G1.residue0	0.36	25.01	Distribution	First residue hydrophobicity: Polar (i.e., R, K, E, D, Q, N)
prop5.G3.residue0	0.36	25.37	Distribution	First residue charge: Negative (i.e., D, E)
LDD	0.34	25.71	Tripeptide	Relative frequency
NLE	0.34	26.05	Tripeptide	Relative frequency
NLS	0.34	26.38	Tripeptide	Relative frequency
TTL	0.33	26.71	Tripeptide	Relative frequency
CIDH920105.lag1.2	0.31	27.02	Geary	Property: normalized average hydrophobicity scales; lag 1
prop2.G2.residue0	0.3	27.32	Distribution	First residue normalized van der Waals volume ~ 2.95-4.0 (i.e., N, V, E, Q, I, L)
prop3.Tr2332	0.3	27.62	Transition	Polarity: 8.0-9.2 <-> 10.4-13.0 (i.e., {P, A, T, G, S} <-> {H, Q, R, K, N, E, D})
NLQ	0.28	27.89	Tripeptide	Relative frequency
LRY	0.28	28.17	Tripeptide	Relative frequency
CHAM810101.lag3.2	0.27	28.44	Geary	Property: steric parameter; lag 3
LDL	0.27	28.72	Tripeptide	Relative frequency
prop6.G3.residue0	0.27	28.99	Distribution	First residue secondary structure: Coil (i.e., G, N, P, S, D)
CIDH920105.lag7	0.27	29.26	Normalized Moreau-Broto	Property: normalized average hydrophobicity scales; lag 7
CIDH920105.lag1.1	0.27	29.52	Moran	Property: normalized average hydrophobicity scales; lag 1
hydrophobicity.Group2	0.26	29.78	Composition	Hydrophobicity: Neutral (i.e., G, A, S, T, P, H, Y)
VS226	0.25	30.03	Conjunt triad	Triad {ILFP}-{ILFP}-{DE}
CHAM810101.lag3	0.25	30.28	Normalized Moreau-Broto	Property: steric parameter; lag 3
MHD	0.24	30.52	Tripeptide	Relative frequency
BHAR880101.lag1	0.23	30.76	Normalized Moreau-Broto	Property: average flexibility indices; lag 1
VS622	0.23	30.99	Conjunt triad	Triad {DE}-{ILFP}-{ILFP}
NLT	0.23	31.22	Tripeptide	Relative frequency
prop1.Tr1221	0.23	31.46	Transition	Hydrophobicity: Polar <-> Neutral (i.e., {R, K, E, D, Q, N} <-> {G, A, S, T, P, H, Y})
LYL	0.23	31.69	Tripeptide	Relative frequency
CIDH920105.lag12	0.23	31.92	Normalized Moreau-Broto	Property: normalized average hydrophobicity scales; lag 12
ELP	0.22	32.14	Tripeptide	Relative frequency
DLS	0.22	32.36	Tripeptide	Relative frequency
PNL	0.22	32.58	Tripeptide	Relative frequency
LE	0.22	32.79	Dipeptide	Relative frequency
I	0.22	33.01	Amino acid	Relative frequency
polarity.Group2	0.22	33.23	Composition	Polarity ~ 8.0-9.2 (i.e., P, A, T, G, S)
CIDH920105.lag4	0.21	33.44	Normalized Moreau-Broto	Property: normalized average hydrophobicity scales; lag 4
SLE	0.21	33.65	Tripeptide	Relative frequency
CHAM810101.lag3.1	0.21	33.87	Moran	Property: steric parameter; lag 3
VS425	0.21	34.08	Conjunt triad	Triad {HNQW}-{ILFP}-{RK}
CIDH920105.lag2.2	0.21	34.29	Geary	Property: normalized average hydrophobicity scales; lag 2
normwaalsvolume.Group1	0.2	34.49	Composition	Normalized van der Waals volume ~ 0-2.78 (i.e., G, A, S, T, P, D, C)
RYL	0.2	34.7	Tripeptide	Relative frequency
BHAR880101.lag1.2	0.2	34.89	Geary	Property: average flexibility index; lag 1
VS262	0.2	35.09	Conjunt triad	Triad {ILFP}-{DE}-{ILFP}
LK	0.2	35.28	Dipeptide	Relative frequency
DDV	0.19	35.47	Tripeptide	Relative frequency
KLK	0.19	35.66	Tripeptide	Relative frequency
LNL	0.19	35.85	Tripeptide	Relative frequency
CIDH920105.lag2.1	0.18	36.03	Moran	Property: normalized average hydrophobicity scales; lag 2
KLE	0.18	36.22	Tripeptide	Relative frequency
GNL	0.18	36.4	Tripeptide	Relative frequency
WE	0.18	36.58	Dipeptide	Relative frequency
NLR	0.18	36.76	Tripeptide	Relative frequency
BHAR880101.lag2	0.18	36.94	Normalized Moreau-Broto	Property: average flexibility indices; lag 2
HLR	0.16	37.1	Tripeptide	Relative frequency
A	0.16	37.26	Amino acid	Relative frequency
solventaccess.Group1	0.16	37.42	Composition	Solvent accessibility: Buried (i.e., A, L, F, C, G, I, V, W)
SLQ	0.16	37.58	Tripeptide	Relative frequency
KEL	0.16	37.73	Tripeptide	Relative frequency
BIGC670101.lag1	0.15	37.89	Normalized Moreau-Broto	Property: residue volume; lag 1
PLA	0.15	38.04	Tripeptide	Relative frequency
CHAM820102.lag12	0.15	38.18	Normalized Moreau-Broto	Property: free energy of solution in water; lag 12
LEI	0.15	38.33	Tripeptide	Relative frequency
CHAM820102.lag2	0.15	38.48	Normalized Moreau-Broto	Property: free energy of solution in water; lag 2
LPL	0.15	38.62	Tripeptide	Relative frequency
DVW	0.15	38.77	Tripeptide	Relative frequency
LKE	0.15	38.91	Tripeptide	Relative frequency
SKL	0.15	39.06	Tripeptide	Relative frequency
BHAR880101.lag1.1	0.14	39.2	Moran	Property: average flexibility index; lag 1
CF	0.14	39.35	Dipeptide	Relative frequency
polarizability.Group1	0.14	39.49	Composition	Polarizability ~ 0-1.08 (i.e., G, A, S, D, T)
VS223	0.14	39.63	Conjunt triad	Triad {ILFP}-{ILFP}-{YMTS}
DAYM780201.lag1	0.14	39.77	Normalized Moreau-Broto	Property: relative mutability; lag 1
LS	0.14	39.9	Dipeptide	Relative frequency
BHAR880101.lag2.2	0.14	40.04	Geary	Property: average flexibility index; lag 2
DFG	0.14	40.18	Tripeptide	Relative frequency
VS266	0.13	40.31	Conjunt triad	Triad {ILFP}-{DE}-{DE}
KLR	0.13	40.44	Tripeptide	Relative frequency
LRV	0.13	40.57	Tripeptide	Relative frequency
VS242	0.13	40.7	Conjunt triad	Triad {ILFP}-{HNQW}-{ILFP}
CFL	0.12	40.82	Tripeptide	Relative frequency
ELV	0.12	40.95	Tripeptide	Relative frequency
BIGC670101.lag7	0.12	41.07	Normalized Moreau-Broto	Property: residue volume; lag 7
BHAR880101.lag12	0.12	41.19	Normalized Moreau-Broto	Property: average flexibility indices; lag 12
BHAR880101.lag4	0.12	41.31	Normalized Moreau-Broto	Property: average flexibility indices; lag 4
BHAR880101.lag3.2	0.12	41.43	Geary	Property: average flexibility index; lag 3
BHAR880101.lag3.1	0.12	41.55	Moran	Property: average flexibility index; lag 3
DIW	0.12	41.66	Tripeptide	Relative frequency
NC	0.12	41.78	Dipeptide	Relative frequency
YL	0.11	41.89	Dipeptide	Relative frequency
BHAR880101.lag2.1	0.11	42	Moran	Property: average flexibility index; lag 2
IW	0.11	42.12	Dipeptide	Relative frequency
LKL	0.11	42.23	Tripeptide	Relative frequency
LTS	0.11	42.34	Tripeptide	Relative frequency
FPE	0.11	42.44	Tripeptide	Relative frequency
BIGC670101.lag12	0.11	42.55	Normalized Moreau-Broto	Property: residue volume; lag 12
EVL	0.11	42.66	Tripeptide	Relative frequency
EW	0.11	42.77	Dipeptide	Relative frequency
VS263	0.11	42.87	Conjunt triad	Triad {ILFP}-{DE}-{YMTS}
VS253	0.11	42.98	Conjunt triad	Triad {ILFP}-{RK}-{YMTS}
VS472	0.11	43.08	Conjunt triad	Triad {HNQW}-{C}-{ILFP}
RII	0.11	43.19	Tripeptide	Relative frequency
VS252	0.1	43.29	Conjunt triad	Triad {ILFP}-{RK}-{ILFP}
EKL	0.1	43.4	Tripeptide	Relative frequency
KLP	0.1	43.5	Tripeptide	Relative frequency
BIGC670101.lag15	0.1	43.61	Normalized Moreau-Broto	Property: residue volume; lag 15
KKL	0.1	43.71	Tripeptide	Relative frequency
CHAM820102.lag15	0.1	43.81	Normalized Moreau-Broto	Property: free energy of solution in water; lag 15
VS725	0.1	43.91	Conjunt triad	Triad {C}-{ILFP}-{RK}
VS562	0.1	44.01	Conjunt triad	Triad {RK}-{DE}-{ILFP}
prop2.Tr2332	0.1	44.11	Transition	Normalized van der Waals volume: 2.95-4.0 <-> 4.03-8.08 (i.e., {N, V, E, Q, I, L} <-> {M, H, K, F, R, Y, W})
LSN	0.1	44.21	Tripeptide	Relative frequency
HDL	0.1	44.31	Tripeptide	Relative frequency
BIGC670101.lag19	0.1	44.41	Normalized Moreau-Broto	Property: residue volume; lag 19
SL	0.1	44.51	Dipeptide	Relative frequency
CIDH920105.lag10	0.1	44.61	Normalized Moreau-Broto	Property: normalized average hydrophobicity scales; lag 10
CIDH920105.lag3.2	0.1	44.7	Geary	Property: normalized average hydrophobicity scales; lag 3
IG	0.1	44.8	Dipeptide	Relative frequency
SHL	0.1	44.89	Tripeptide	Relative frequency
SLK	0.1	44.99	Tripeptide	Relative frequency
CHAM820102.lag17	0.09	45.08	Normalized Moreau-Broto	Property: free energy of solution in water; lag 17
LEN	0.09	45.18	Tripeptide	Relative frequency
CHAM820101.lag1	0.09	45.27	Normalized Moreau-Broto	Property: polarizability parameter; lag 1
KLT	0.09	45.37	Tripeptide	Relative frequency
LY	0.09	45.46	Dipeptide	Relative frequency
EL	0.09	45.56	Dipeptide	Relative frequency
VS522	0.09	45.65	Conjunt triad	Triad {RK}-{ILFP}-{ILFP}
CIDH920105.lag19	0.09	45.74	Normalized Moreau-Broto	Property: normalized average hydrophobicity scales; lag 19
NLV	0.09	45.83	Tripeptide	Relative frequency
AA	0.09	45.92	Dipeptide	Relative frequency
RNL	0.09	46.02	Tripeptide	Relative frequency
HLK	0.09	46.11	Tripeptide	Relative frequency
RLS	0.09	46.2	Tripeptide	Relative frequency
CHAM810101.lag12.2	0.09	46.29	Geary	Property: steric parameter; lag 12
CHAM810101.lag12	0.09	46.38	Normalized Moreau-Broto	Property: steric parameter; lag 12
KC	0.09	46.47	Dipeptide	Relative frequency
YLH	0.09	46.56	Tripeptide	Relative frequency
VS532	0.09	46.65	Conjunt triad	Triad {RK}-{YMTS}-{ILFP}
CIDH920105.lag25	0.09	46.73	Normalized Moreau-Broto	Property: normalized average hydrophobicity scales; lag 25
FP	0.09	46.82	Dipeptide	Relative frequency
LKT	0.09	46.91	Tripeptide	Relative frequency
DVY	0.09	46.99	Tripeptide	Relative frequency
VS625	0.09	47.08	Conjunt triad	Triad {DE}-{ILFP}-{RK}
DC	0.09	47.16	Dipeptide	Relative frequency
CIDH920105.lag3.1	0.08	47.25	Moran	Property: normalized average hydrophobicity scales; lag 3
DAYM780201.lag4	0.08	47.33	Normalized Moreau-Broto	Property: relative mutability; lag 4
LDI	0.08	47.42	Tripeptide	Relative frequency
prop5.G3.residue100	0.08	47.5	Distribution	100% residues charge: Negative (i.e., D, E)
KSL	0.08	47.58	Tripeptide	Relative frequency
LR	0.08	47.66	Dipeptide	Relative frequency
LSG	0.08	47.75	Tripeptide	Relative frequency
VS234	0.08	47.83	Conjunt triad	Triad {ILFP}-{YMTS}-{HNQW}
VS722	0.08	47.91	Conjunt triad	Triad {C}-{ILFP}-{ILFP}
LEK	0.08	47.99	Tripeptide	Relative frequency
VS326	0.08	48.07	Conjunt triad	Triad {YMTS}-{ILFP}-{DE}
prop7.Tr2332	0.08	48.15	Transition	Solvent accessibility: Exposed <-> Intermediate (i.e., {R, K, Q, E, N, D} <-> {M, S, P, T, H, Y})
ESL	0.08	48.23	Tripeptide	Relative frequency
NI	0.08	48.31	Dipeptide	Relative frequency
LRI	0.08	48.39	Tripeptide	Relative frequency
TSL	0.08	48.47	Tripeptide	Relative frequency
VS251	0.08	48.55	Conjunt triad	Triad {ILFP}-{RK}-{AGV}
ENL	0.08	48.63	Tripeptide	Relative frequency
LPS	0.08	48.71	Tripeptide	Relative frequency
LSI	0.08	48.79	Tripeptide	Relative frequency
CHAM820102.lag5	0.08	48.86	Normalized Moreau-Broto	Property: free energy of solution in water; lag 5
VS426	0.08	48.94	Conjunt triad	Triad {HNQW}-{ILFP}-{DE}
AS	0.08	49.02	Dipeptide	Relative frequency
prop1.Tr2332	0.08	49.09	Transition	Hydrophobicity: Neutral <-> Hydrophobic (i.e., {G, A, S, T, P, H, Y} <-> {C, L, V, I, M, F, W})
HD	0.08	49.17	Dipeptide	Relative frequency
VS126	0.08	49.24	Conjunt triad	Triad {AGV}-{ILFP}-{DE}
BIGC670101.lag4	0.08	49.32	Normalized Moreau-Broto	Property: residue volume; lag 4
VS256	0.08	49.39	Conjunt triad	Triad {ILFP}-{RK}-{DE}
GMG	0.07	49.47	Tripeptide	Relative frequency
MGG	0.07	49.54	Tripeptide	Relative frequency
CHAM820102.lag1	0.07	49.62	Normalized Moreau-Broto	Property: free energy of solution in water; lag 1
WCL	0.07	49.69	Tripeptide	Relative frequency
LP	0.07	49.76	Dipeptide	Relative frequency
LKI	0.07	49.84	Tripeptide	Relative frequency
CHAM820102.lag14	0.07	49.91	Normalized Moreau-Broto	Property: free energy of solution in water; lag 14
VS525	0.07	49.98	Conjunt triad	Triad {RK}-{ILFP}-{RK}
LES	0.07	50.05	Tripeptide	Relative frequency
LEY	0.07	50.12	Tripeptide	Relative frequency
CIDH920105.lag22	0.07	50.19	Normalized Moreau-Broto	Property: normalized average hydrophobicity scales; lag 22
CHAM820101.lag12	0.07	50.26	Normalized Moreau-Broto	Property: polarizability parameter; lag 12
CIDH920105.lag7.1	0.07	50.34	Moran	Property: normalized average hydrophobicity scales; lag 7
LD	0.07	50.41	Dipeptide	Relative frequency
prop2.Tr1331	0.07	50.48	Transition	Normalized van der Waals volume: 0-2.78 <-> 4.03-8.08 (i.e., {G, A, S, T, P, D, C} <-> {M, H, K, F, R, Y, W})
FLY	0.07	50.55	Tripeptide	Relative frequency
LKV	0.07	50.62	Tripeptide	Relative frequency
BIGC670101.lag8	0.07	50.69	Normalized Moreau-Broto	Property: residue volume; lag 8
P	0.07	50.76	Amino acid	Relative frequency
BHAR880101.lag7	0.07	50.83	Normalized Moreau-Broto	Property: average flexibility indices; lag 7
BHAR880101.lag12.2	0.07	50.9	Geary	Property: average flexibility index; lag 12
VS652	0.07	50.96	Conjunt triad	Triad {DE}-{RK}-{ILFP}
CHAM810101.lag12.1	0.07	51.03	Moran	Property: steric parameter; lag 12
HL	0.07	51.1	Dipeptide	Relative frequency
HRD	0.07	51.17	Tripeptide	Relative frequency
DIK	0.07	51.23	Tripeptide	Relative frequency
SLT	0.07	51.3	Tripeptide	Relative frequency
CHAM820102.lag9	0.07	51.36	Normalized Moreau-Broto	Property: free energy of solution in water; lag 9
prop7.G3.residue25	0.07	51.43	Distribution	25% residues solvent accessibility: Intermediate (i.e., M, S, P, T, H, Y)
CHAM810101.lag24.1	0.07	51.5	Moran	Property: steric parameter; lag 24
SP	0.06	51.56	Dipeptide	Relative frequency
FPK	0.06	51.62	Tripeptide	Relative frequency
CIDH920105.lag7.2	0.06	51.69	Geary	Property: normalized average hydrophobicity scales; lag 7
VS352	0.06	51.75	Conjunt triad	Triad {YMTS}-{RK}-{ILFP}
DAYM780201.lag16	0.06	51.82	Normalized Moreau-Broto	Property: relative mutability; lag 16
DI	0.06	51.88	Dipeptide	Relative frequency
CHAM810101.lag24.2	0.06	51.94	Geary	Property: steric parameter; lag 24
solventaccess.Group3	0.06	52	Composition	Solvent accessibility: Intermediate (i.e., M, S, P, T, H, Y)
CHAM820101.lag15	0.06	52.06	Normalized Moreau-Broto	Property: polarizability parameter; lag 15
VS423	0.06	52.13	Conjunt triad	Triad {HNQW}-{ILFP}-{YMTS}
GKL	0.06	52.19	Tripeptide	Relative frequency
CHAM820101.lag7	0.06	52.25	Normalized Moreau-Broto	Property: polarizability parameter; lag 7
KRL	0.06	52.31	Tripeptide	Relative frequency
CHAM820102.lag28	0.06	52.37	Normalized Moreau-Broto	Property: free energy of solution in water; lag 28
VS347	0.06	52.43	Conjunt triad	Triad {YMTS}-{HNQW}-{C}
BHAR880101.lag10	0.06	52.49	Normalized Moreau-Broto	Property: average flexibility indices; lag 10
VS623	0.06	52.55	Conjunt triad	Triad {DE}-{ILFP}-{YMTS}
VS526	0.06	52.61	Conjunt triad	Triad {RK}-{ILFP}-{DE}
CIDH920105.lag16	0.06	52.67	Normalized Moreau-Broto	Property: normalized average hydrophobicity scales; lag 16
KVL	0.06	52.73	Tripeptide	Relative frequency
SNL	0.06	52.79	Tripeptide	Relative frequency
WIA	0.06	52.85	Tripeptide	Relative frequency
RVL	0.06	52.91	Tripeptide	Relative frequency
KNL	0.06	52.97	Tripeptide	Relative frequency
VS642	0.06	53.03	Conjunt triad	Triad {DE}-{HNQW}-{ILFP}
VS246	0.06	53.09	Conjunt triad	Triad {ILFP}-{HNQW}-{DE}
PEY	0.06	53.14	Tripeptide	Relative frequency
VYK	0.06	53.2	Tripeptide	Relative frequency
YLS	0.06	53.26	Tripeptide	Relative frequency
CIDH920105.lag4.2	0.06	53.32	Geary	Property: normalized average hydrophobicity scales; lag 4
SYD	0.06	53.38	Tripeptide	Relative frequency
TLA	0.06	53.43	Tripeptide	Relative frequency
LGK	0.06	53.49	Tripeptide	Relative frequency
CIDH920105.lag28	0.06	53.55	Normalized Moreau-Broto	Property: normalized average hydrophobicity scales; lag 28
CHAM820102.lag11	0.06	53.61	Normalized Moreau-Broto	Property: free energy of solution in water; lag 11
LEV	0.06	53.66	Tripeptide	Relative frequency
CIDH920105.lag30	0.06	53.72	Normalized Moreau-Broto	Property: normalized average hydrophobicity scales; lag 30
VS267	0.06	53.77	Conjunt triad	Triad {ILFP}-{DE}-{C}
AP	0.06	53.83	Dipeptide	Relative frequency
RL	0.06	53.88	Dipeptide	Relative frequency
CHAM820101.lag9	0.05	53.94	Normalized Moreau-Broto	Property: polarizability parameter; lag 9
IVG	0.05	53.99	Tripeptide	Relative frequency
YC	0.05	54.05	Dipeptide	Relative frequency
SLR	0.05	54.1	Tripeptide	Relative frequency
CHAM820102.lag13	0.05	54.15	Normalized Moreau-Broto	Property: free energy of solution in water; lag 13
CHAM820102.lag19	0.05	54.21	Normalized Moreau-Broto	Property: free energy of solution in water; lag 19
CIDH920105.lag15	0.05	54.26	Normalized Moreau-Broto	Property: normalized average hydrophobicity scales; lag 15
CHAM820101.lag19	0.05	54.32	Normalized Moreau-Broto	Property: polarizability parameter; lag 19
YSF	0.05	54.37	Tripeptide	Relative frequency
VYE	0.05	54.42	Tripeptide	Relative frequency
HNL	0.05	54.48	Tripeptide	Relative frequency
prop4.Tr2332	0.05	54.53	Transition	Polarizability: 0.128-0.186 <-> 0.219-0.409 (i.e., {C, P, N, V, E, Q, I, L} <-> {K, M, H, F, R, Y, W})
PKL	0.05	54.58	Tripeptide	Relative frequency
CHAM820101.lag26	0.05	54.63	Normalized Moreau-Broto	Property: polarizability parameter; lag 26
BIGC670101.lag28	0.05	54.69	Normalized Moreau-Broto	Property: residue volume; lag 28
KT	0.05	54.74	Dipeptide	Relative frequency
secondarystruct.Group2	0.05	54.79	Composition	Secondary structure: Strand (i.e., V, I, Y, C, W, F, T)
DL	0.05	54.84	Dipeptide	Relative frequency
CHAM820102.lag18	0.05	54.9	Normalized Moreau-Broto	Property: free energy of solution in water; lag 18
CHAM820102.lag27	0.05	54.95	Normalized Moreau-Broto	Property: free energy of solution in water; lag 27
FD	0.05	55	Dipeptide	Relative frequency
LSL	0.05	55.05	Tripeptide	Relative frequency
CHAM820101.lag16	0.05	55.1	Normalized Moreau-Broto	Property: polarizability parameter; lag 16
prop5.G1.residue0	0.05	55.15	Distribution	First residue charge: Positive (i.e., K, R)
CHAM820102.lag25	0.05	55.2	Normalized Moreau-Broto	Property: free energy of solution in water; lag 25
VS236	0.05	55.25	Conjunt triad	Triad {ILFP}-{YMTS}-{DE}
BIGC670101.lag2	0.05	55.3	Normalized Moreau-Broto	Property: residue volume; lag 2
LW	0.05	55.35	Dipeptide	Relative frequency
CHAM820101.lag20	0.05	55.4	Normalized Moreau-Broto	Property: polarizability parameter; lag 20
LEE	0.05	55.45	Tripeptide	Relative frequency
BIGC670101.lag9	0.05	55.5	Normalized Moreau-Broto	Property: residue volume; lag 9
BHAR880101.lag3	0.05	55.55	Normalized Moreau-Broto	Property: average flexibility indices; lag 3
LKS	0.05	55.6	Tripeptide	Relative frequency
BHAR880101.lag12.1	0.05	55.65	Moran	Property: average flexibility index; lag 12
VS524	0.05	55.7	Conjunt triad	Triad {RK}-{ILFP}-{HNQW}
KEI	0.05	55.75	Tripeptide	Relative frequency
SA	0.05	55.8	Dipeptide	Relative frequency
CIDH920105.lag26	0.05	55.84	Normalized Moreau-Broto	Property: normalized average hydrophobicity scales; lag 26
ELK	0.05	55.89	Tripeptide	Relative frequency
NNL	0.05	55.94	Tripeptide	Relative frequency
YD	0.05	55.99	Dipeptide	Relative frequency
LTN	0.05	56.03	Tripeptide	Relative frequency
CHAM820101.lag2	0.05	56.08	Normalized Moreau-Broto	Property: polarizability parameter; lag 2
LT	0.05	56.13	Dipeptide	Relative frequency
NIL	0.05	56.18	Tripeptide	Relative frequency
prop3.Tr1221	0.05	56.22	Transition	Polarity: 4.9-6.2 <-> 8.0-9.2 (i.e., { L, I, F, W, C, M, V, Y} <-> {P, A, T, G, S})
CIDH920105.lag12.1	0.05	56.27	Moran	Property: normalized average hydrophobicity scales; lag 12
LET	0.05	56.32	Tripeptide	Relative frequency
VS342	0.05	56.36	Conjunt triad	Triad {HNQW}-{YMTS}-{ILFP}
DAYM780201.lag1.2	0.05	56.41	Geary	Property: relative mutability; lag 1
LGN	0.05	56.46	Tripeptide	Relative frequency
CHAM820102.lag20	0.05	56.5	Normalized Moreau-Broto	Property: free energy of solution in water; lag 20
VS672	0.05	56.55	Conjunt triad	Triad {DE}-{C}-{ILFP}
VS627	0.05	56.6	Conjunt triad	Triad {DE}-{ILFP}-{C}
CHAM820102.lag26	0.05	56.64	Normalized Moreau-Broto	Property: free energy of solution in water; lag 26
prop7.G3.residue50	0.05	56.69	Distribution	50% residues solvent accessibility: Intermediate (i.e., M, S, P, T, H, Y)
CHOC760101.lag1	0.05	56.73	Normalized Moreau-Broto	Property: residue accessible surface area in tripeptide; lag 1
CIDH920105.lag4.1	0.05	56.78	Moran	Property: normalized average hydrophobicity scales; lag 4
CHAM820102.lag4	0.05	56.83	Normalized Moreau-Broto	Property: free energy of solution in water; lag 4
VS264	0.04	56.87	Conjunt triad	Triad {ILFP}-{DE}-{HNQW}
KI	0.04	56.91	Dipeptide	Relative frequency
BHAR880101.lag4.2	0.04	56.96	Geary	Property: average flexibility index; lag 4
RLK	0.04	57	Tripeptide	Relative frequency
BIGC670101.lag16	0.04	57.05	Normalized Moreau-Broto	Property: residue volume; lag 16
VS225	0.04	57.09	Conjunt triad	Triad {ILFP}-{ILFP}-{RK}
KLQ	0.04	57.14	Tripeptide	Relative frequency
RLE	0.04	57.18	Tripeptide	Relative frequency
GLP	0.04	57.23	Tripeptide	Relative frequency
DF	0.04	57.27	Dipeptide	Relative frequency
CHAM820101.lag8	0.04	57.31	Normalized Moreau-Broto	Property: polarizability parameter; lag 8
prop4.Tr1331	0.04	57.36	Transition	Polarizability: 0-1.08 <-> 0.219-0.409 (i.e., {G, A, S, D, T} <-> {K, M, H, F, R, Y, W})
CIDH920105.lag9	0.04	57.4	Normalized Moreau-Broto	Property: normalized average hydrophobicity scales; lag 9
CHOC760101.lag12	0.04	57.45	Normalized Moreau-Broto	Property: residue accessible surface area in tripeptide; lag 12
RSL	0.04	57.49	Tripeptide	Relative frequency
IGY	0.04	57.53	Tripeptide	Relative frequency
SY	0.04	57.58	Dipeptide	Relative frequency
GIG	0.04	57.62	Tripeptide	Relative frequency
CHAM820101.lag22	0.04	57.66	Normalized Moreau-Broto	Property: polarizability parameter; lag 22
DAYM780201.lag7	0.04	57.7	Normalized Moreau-Broto	Property: relative mutability; lag 7
VS621	0.04	57.75	Conjunt triad	Triad {DE}-{ILFP}-{AGV}
CHAM820101.lag4	0.04	57.79	Normalized Moreau-Broto	Property: polarizability parameter; lag 4
VS662	0.04	57.83	Conjunt triad	Triad {DE}-{DE}-{ILFP}
BIGC670101.lag1.2	0.04	57.87	Geary	Property: residue volume; lag 2
LC	0.04	57.91	Dipeptide	Relative frequency
YLN	0.04	57.96	Tripeptide	Relative frequency
REL	0.04	58	Tripeptide	Relative frequency
IP	0.04	58.04	Dipeptide	Relative frequency
IFP	0.04	58.08	Tripeptide	Relative frequency
BIGC670101.lag26	0.04	58.12	Normalized Moreau-Broto	Property: residue volume; lag 26
LH	0.04	58.16	Dipeptide	Relative frequency
CHAM810101.lag24	0.04	58.2	Normalized Moreau-Broto	Property: steric parameter; lag 24
BHAR880101.lag15	0.04	58.24	Normalized Moreau-Broto	Property: average flexibility indices; lag 15
PE	0.04	58.28	Dipeptide	Relative frequency
LEL	0.04	58.33	Tripeptide	Relative frequency
EI	0.04	58.37	Dipeptide	Relative frequency
RY	0.04	58.41	Dipeptide	Relative frequency
CIDH920105.lag12.2	0.04	58.45	Geary	Property: normalized average hydrophobicity scales; lag 12
VS442	0.04	58.49	Conjunt triad	Triad {HNQW}-{HNQW}-{ILFP}
VS244	0.04	58.53	Conjunt triad	Triad {ILFP}-{HNQW}-{HNQW}
ILL	0.04	58.57	Tripeptide	Relative frequency
BIGC670101.lag20	0.04	58.61	Normalized Moreau-Broto	Property: residue volume; lag 20
CHOC760101.lag15	0.04	58.65	Normalized Moreau-Broto	Property: residue accessible surface area in tripeptide; lag 15
FGV	0.04	58.69	Tripeptide	Relative frequency
VS632	0.04	58.73	Conjunt triad	Triad {DE}-{YMTS}-{ILFP}
CHAM810101.lag1.2	0.04	58.76	Geary	Property: steric parameter; lag 2
YKG	0.04	58.8	Tripeptide	Relative frequency
YN	0.04	58.84	Dipeptide	Relative frequency
VS542	0.04	58.88	Conjunt triad	Triad {RK}-{HNQW}-{ILFP}
CHAM820102.lag6	0.04	58.92	Normalized Moreau-Broto	Property: free energy of solution in water; lag 6
solventaccess.Group2	0.04	58.96	Composition	Solvent accessibility: Exposed (i.e., R, K, Q, E, N, D)
VS233	0.04	58.99	Conjunt triad	Triad {ILFP}-{YMTS}-{YMTS}
CIDH920105.lag20	0.04	59.03	Normalized Moreau-Broto	Property: normalized average hydrophobicity scales; lag 20
LVG	0.04	59.07	Tripeptide	Relative frequency
RP	0.04	59.11	Dipeptide	Relative frequency
IH	0.04	59.15	Dipeptide	Relative frequency
CHAM820102.lag30	0.04	59.18	Normalized Moreau-Broto	Property: free energy of solution in water; lag 30
prop5.G2.residue50	0.04	59.22	Distribution	50% residues charge: Neutral (i.e., A, N, C, Q, G, H, I, L, M, F, P, S, T, W, Y, V)
polarity.Group3	0.04	59.26	Composition	Polarity ~ 10.4-13.0 (i.e., H, Q, R, K, N, E, D)
VY	0.04	59.3	Dipeptide	Relative frequency
LVY	0.04	59.33	Tripeptide	Relative frequency
CHAM820101.lag21	0.04	59.37	Normalized Moreau-Broto	Property: polarizability parameter; lag 21
TP	0.04	59.41	Dipeptide	Relative frequency
EEL	0.04	59.45	Tripeptide	Relative frequency
VS462	0.04	59.48	Conjunt triad	Triad {HNQW}-{DE}-{ILFP}
charge.Group2	0.04	59.52	Composition	Charge: Neutral (i.e., A, N, C, Q, G, H, I, L, M, F, P, S, T, W, Y, V)
VS212	0.04	59.56	Conjunt triad	Triad {ILFP}-{AGV}-{ILFP}
CHAM820102.lag16	0.04	59.59	Normalized Moreau-Broto	Property: free energy of solution in water; lag 16
CHAM820101.lag11	0.04	59.63	Normalized Moreau-Broto	Property: polarizability parameter; lag 11
TT	0.04	59.67	Dipeptide	Relative frequency
VS624	0.04	59.7	Conjunt triad	Triad {DE}-{ILFP}-{HNQW}
SLP	0.04	59.74	Tripeptide	Relative frequency
DAYM780201.lag28	0.04	59.78	Normalized Moreau-Broto	Property: relative mutability; lag 28
DLK	0.04	59.81	Tripeptide	Relative frequency
prop7.G3.residue75	0.04	59.85	Distribution	75% residues solvent accessibility: Intermediate (i.e., M, S, P, T, H, Y)
CHAM820101.lag28	0.04	59.88	Normalized Moreau-Broto	Property: polarizability parameter; lag 28
CHAM810101.lag1.1	0.04	59.92	Moran	Property: steric parameter; lag 1
DAYM780201.lag1.1	0.04	59.96	Moran	Property: relative mutability; lag 1
PRL	0.04	59.99	Tripeptide	Relative frequency
VS724	0.04	60.03	Conjunt triad	Triad {C}-{ILFP}-{HNQW}
YE	0.04	60.06	Dipeptide	Relative frequency
FG	0.04	60.1	Dipeptide	Relative frequency
BHAR880101.lag7.1	0.04	60.13	Moran	Property: average flexibility index; lag 7
prop6.G3.residue25	0.04	60.17	Distribution	25% residues secondary structure: Coil (i.e., G, N, P, S, D)
W	0.04	60.2	Amino acid	Relative frequency
CHAM820101.lag18	0.04	60.24	Normalized Moreau-Broto	Property: polarizability parameter; lag 18
LRG	0.03	60.27	Tripeptide	Relative frequency
QNL	0.03	60.31	Tripeptide	Relative frequency
DAYM780201.lag13	0.03	60.34	Normalized Moreau-Broto	Property: relative mutability; lag 13
VS162	0.03	60.38	Conjunt triad	Triad {AGV}-{DE}-{ILFP}
VS422	0.03	60.41	Conjunt triad	Triad {HNQW}-{ILFP}-{ILFP}
BHAR880101.lag7.2	0.03	60.45	Geary	Property: average flexibility index; lag 7
prop3.G1.residue50	0.03	60.48	Distribution	25% residues charge: Neutral (i.e., A, N, C, Q, G, H, I, L, M, F, P, S, T, W, Y, V)
VS232	0.03	60.52	Conjunt triad	Triad {ILFP}-{YMTS}-{ILFP}
CIDH920105.lag13	0.03	60.55	Normalized Moreau-Broto	Property: normalized average hydrophobicity scales; lag 13
LKG	0.03	60.59	Tripeptide	Relative frequency
VS452	0.03	60.62	Conjunt triad	Triad {HNQW}-{RK}-{ILFP}
VG	0.03	60.65	Dipeptide	Relative frequency
prop5.G2.residue25	0.03	60.69	Distribution	25% residues charge: Neutral (i.e., A, N, C, Q, G, H, I, L, M, F, P, S, T, W, Y, V)
FI	0.03	60.72	Dipeptide	Relative frequency
BIGC670101.lag6	0.03	60.76	Normalized Moreau-Broto	Property: residue volume; lag 6
CL	0.03	60.79	Dipeptide	Relative frequency
NKL	0.03	60.82	Tripeptide	Relative frequency
IK	0.03	60.86	Dipeptide	Relative frequency
BIGC670101.lag18	0.03	60.89	Normalized Moreau-Broto	Property: residue volume; lag 18
CHAM820102.lag21	0.03	60.93	Normalized Moreau-Broto	Property: free energy of solution in water; lag 21
PP	0.03	60.96	Dipeptide	Relative frequency
NGS	0.03	60.99	Tripeptide	Relative frequency
BIGC670101.lag10	0.03	61.03	Normalized Moreau-Broto	Property: residue volume; lag 10
CHAM820102.lag29	0.03	61.06	Normalized Moreau-Broto	Property: free energy of solution in water; lag 29
CHAM820101.lag10	0.03	61.09	Normalized Moreau-Broto	Property: polarizability parameter; lag 10
CHAM820101.lag23	0.03	61.13	Normalized Moreau-Broto	Property: polarizability parameter; lag 23
LSK	0.03	61.16	Tripeptide	Relative frequency
DAYM780201.lag30	0.03	61.19	Normalized Moreau-Broto	Property: relative mutability; lag 30
YI	0.03	61.23	Dipeptide	Relative frequency
BHAR880101.lag4.1	0.03	61.26	Moran	Property: average flexibility index; lag 4
CHAM820101.lag3	0.03	61.29	Normalized Moreau-Broto	Property: polarizability parameter; lag 3
Y	0.03	61.33	Amino acid	Relative frequency
CIDH920105.lag24.2	0.03	61.36	Geary	Property: normalized average hydrophobicity scales; lag 24
KLI	0.03	61.39	Tripeptide	Relative frequency
IHR	0.03	61.42	Tripeptide	Relative frequency
CHAM820101.lag14	0.03	61.46	Normalized Moreau-Broto	Property: polarizability parameter; lag 14
II	0.03	61.49	Dipeptide	Relative frequency
LDW	0.03	61.52	Tripeptide	Relative frequency
CS	0.03	61.55	Dipeptide	Relative frequency
CHAM820101.lag6	0.03	61.59	Normalized Moreau-Broto	Property: polarizability parameter; lag 6
SGC	0.03	61.62	Tripeptide	Relative frequency
LPN	0.03	61.65	Tripeptide	Relative frequency
prop7.G1.residue25	0.03	61.68	Distribution	25% residues solvent accessibility: Buried (i.e., A, L, F, C, G, I, V, W)
CHAM820101.lag29	0.03	61.72	Normalized Moreau-Broto	Property: polarizability parameter; lag 29
BIGC670101.lag30	0.03	61.75	Normalized Moreau-Broto	Property: residue volume; lag 30
CHAM820101.lag17	0.03	61.78	Normalized Moreau-Broto	Property: polarizability parameter; lag 17
VS224	0.03	61.81	Conjunt triad	Triad {ILFP}-{ILFP}-{HNQW}
AV	0.03	61.84	Dipeptide	Relative frequency
hydrophobicity.Group1	0.03	61.87	Composition	Hydrophobicity: Polar (i.e., R, K, E, D, Q, N)
BIGC670101.lag1.1	0.03	61.91	Moran	Property: residue volume; lag 1
NNF	0.03	61.94	Tripeptide	Relative frequency
CHAM820101.lag13	0.03	61.97	Normalized Moreau-Broto	Property: polarizability parameter; lag 13
RI	0.03	62	Dipeptide	Relative frequency
MK	0.03	62.03	Dipeptide	Relative frequency
IN	0.03	62.06	Dipeptide	Relative frequency
GSL	0.03	62.09	Tripeptide	Relative frequency
CHAM820102.lag7	0.03	62.12	Normalized Moreau-Broto	Property: free energy of solution in water; lag 7
LQ	0.03	62.15	Dipeptide	Relative frequency
CIDH920105.lag23	0.03	62.19	Normalized Moreau-Broto	Property: normalized average hydrophobicity scales; lag 23
VS215	0.03	62.22	Conjunt triad	Triad {ILFP}-{AGV}-{RK}
EIP	0.03	62.25	Tripeptide	Relative frequency
BIGC670101.lag17	0.03	62.28	Normalized Moreau-Broto	Property: residue volume; lag 17
Feature names and categories are those described in the prot R Package (Xiao et al 2015, https://cran.r-project.org/web/packages/protr/vignettes/protr.html)

## Sheet: RD-RFPDR (1_1)
Supplementary table S3 (b). Mean Gini importance of features in the Reduced-Dimention model (RD-RFPDR)
The most important features in RD-RFPDR, which account for 50% cumulative importance are presented (percImp: percentage of Importance; cumsum: cumulative sum)
In bold, the to 5% features. In bold+itallic, top 1% features.
Feature	percImpmeanMeanDecreaseGini	cumsum	Feature Category	Feature description
length	3.44	3.44	Sequence length	Sequence length (in amino acids)
prop3.Tr1331	1.89	5.34	Transition	Polarity: 4.9-6.2 <-> 10.4-13.0 (i.e., {L, I, F, W, C, M, V, Y} <-> {H, Q, R, K, N, E, D})
GKT	1.87	7.2	Tripeptide	Relative frequency
prop1.Tr1331	1.83	9.03	Transition	Hydrophobicity: Polar <-> Hydrophobic (i.e., {R, K, E, D, Q, N} <-> {C, L, V, I, M, F, W})
L	1.78	10.82	Amino acid	Relative frequency
KTT	1.55	12.36	Tripeptide	Relative frequency
CIDH920105.lag1	1.51	13.87	Normalized Moreau-Broto	Property: normalized average hydrophobicity scales; lag 1
VLD	1.24	15.11	Tripeptide	Relative frequency
IGK	1.19	16.29	Tripeptide	Relative frequency
normwaalsvolume.Group2	1.17	17.46	Composition	Normalized van der Waals volume ~ 2.95-4.0 (i.e., N, V, E, Q, I, L)
CIDH920105.lag2	1.03	18.49	Normalized Moreau-Broto	Property: normalized average hydrophobicity scales; lag 2
LSY	1.02	19.52	Tripeptide	Relative frequency
NL	0.88	20.4	Dipeptide	Relative frequency
hydrophobicity.Group3	0.85	21.25	Composition	Hydrophobicity: Hydrophobic (i.e., C, L, V, I, M, F, W)
TTR	0.84	22.09	Tripeptide	Relative frequency
TTL	0.75	22.84	Tripeptide	Relative frequency
NLK	0.73	23.57	Tripeptide	Relative frequency
polarity.Group1	0.7	24.27	Composition	Polarity ~ 4.9-6.2 (i.e., L, I, F, W, C, M, V, Y)
prop7.Tr1221	0.68	24.95	Transition	Solvent accessibility: Buried <-> Exposed (i.e., {A, L, F, C, G, I, V, W} <-> {R, K, Q, E, N, D})
NLS	0.67	25.62	Tripeptide	Relative frequency
LDD	0.65	26.27	Tripeptide	Relative frequency
LDL	0.63	26.9	Tripeptide	Relative frequency
polarizability.Group2	0.62	27.52	Composition	Polarizability ~ 0.128-0.186 (i.e., C, P, N, V, E, Q, I, L)
NLQ	0.6	28.12	Tripeptide	Relative frequency
NLE	0.56	28.67	Tripeptide	Relative frequency
KL	0.55	29.22	Dipeptide	Relative frequency
LYL	0.54	29.76	Tripeptide	Relative frequency
NLT	0.53	30.3	Tripeptide	Relative frequency
LRY	0.52	30.82	Tripeptide	Relative frequency
DLS	0.5	31.32	Tripeptide	Relative frequency
prop3.Tr2332	0.5	31.83	Transition	Polarity: 8.0-9.2 <-> 10.4-13.0 (i.e., {P, A, T, G, S} <-> {H, Q, R, K, N, E, D})
CHAM810101.lag3	0.49	32.32	Normalized Moreau-Broto	Property: steric parameter; lag 3
CIDH920105.lag1.2	0.47	32.79	Geary	Property: normalized average hydrophobicity scales; lag 1
VS226	0.46	33.25	Conjunt triad	Triad {ILFP}-{ILFP}-{DE}
CHAM810101.lag3.1	0.46	33.7	Moran	Property: steric parameter; lag 3
DFG	0.44	34.14	Tripeptide	Relative frequency
CIDH920105.lag1.1	0.43	34.57	Moran	Property: normalized average hydrophobicity scales; lag 1
GNL	0.43	34.99	Tripeptide	Relative frequency
LNL	0.41	35.41	Tripeptide	Relative frequency
ELP	0.4	35.81	Tripeptide	Relative frequency
VS262	0.4	36.2	Conjunt triad	Triad {ILFP}-{DE}-{ILFP}
RYL	0.39	36.6	Tripeptide	Relative frequency
MHD	0.39	36.98	Tripeptide	Relative frequency
HLR	0.38	37.36	Tripeptide	Relative frequency
hydrophobicity.Group2	0.37	37.73	Composition	Hydrophobicity: Neutral (i.e., G, A, S, T, P, H, Y)
CHAM810101.lag3.2	0.37	38.1	Geary	Property: steric parameter; lag 3
WE	0.35	38.45	Dipeptide	Relative frequency
BHAR880101.lag1	0.35	38.8	Normalized Moreau-Broto	Property: average flexibility indices; lag 1
CIDH920105.lag7	0.35	39.15	Normalized Moreau-Broto	Property: normalized average hydrophobicity scales; lag 7
LK	0.34	39.48	Dipeptide	Relative frequency
DVW	0.34	39.82	Tripeptide	Relative frequency
DDV	0.34	40.16	Tripeptide	Relative frequency
CIDH920105.lag12	0.33	40.49	Normalized Moreau-Broto	Property: normalized average hydrophobicity scales; lag 12
KLK	0.33	40.81	Tripeptide	Relative frequency
NLR	0.33	41.14	Tripeptide	Relative frequency
YLH	0.32	41.46	Tripeptide	Relative frequency
CIDH920105.lag2.2	0.31	41.77	Geary	Property: normalized average hydrophobicity scales; lag 2
prop1.Tr1221	0.3	42.08	Transition	Hydrophobicity: Polar <-> Neutral (i.e., {R, K, E, D, Q, N} <-> {G, A, S, T, P, H, Y})
VS622	0.29	42.37	Conjunt triad	Triad {DE}-{ILFP}-{ILFP}
BHAR880101.lag1.2	0.29	42.66	Geary	Property: average flexibility index; lag 1
I	0.29	42.95	Amino acid	Relative frequency
LE	0.28	43.22	Dipeptide	Relative frequency
CHAM820102.lag2	0.28	43.5	Normalized Moreau-Broto	Property: free energy of solution in water; lag 2
LPL	0.28	43.78	Tripeptide	Relative frequency
CIDH920105.lag4	0.27	44.05	Normalized Moreau-Broto	Property: normalized average hydrophobicity scales; lag 4
EKL	0.27	44.31	Tripeptide	Relative frequency
A	0.26	44.58	Amino acid	Relative frequency
BHAR880101.lag2	0.26	44.83	Normalized Moreau-Broto	Property: average flexibility indices; lag 2
SKL	0.26	45.09	Tripeptide	Relative frequency
DVY	0.26	45.35	Tripeptide	Relative frequency
CIDH920105.lag2.1	0.25	45.59	Moran	Property: normalized average hydrophobicity scales; lag 2
CHAM820102.lag12	0.24	45.84	Normalized Moreau-Broto	Property: free energy of solution in water; lag 12
polarity.Group2	0.24	46.08	Composition	Polarity ~ 8.0-9.2 (i.e., P, A, T, G, S)
normwaalsvolume.Group1	0.24	46.32	Composition	Normalized van der Waals volume ~ 0-2.78 (i.e., G, A, S, T, P, D, C)
KEL	0.24	46.56	Tripeptide	Relative frequency
polarizability.Group1	0.24	46.79	Composition	Polarizability ~ 0-1.08 (i.e., G, A, S, D, T)
VS425	0.23	47.03	Conjunt triad	Triad {HNQW}-{ILFP}-{RK}
FP	0.23	47.26	Dipeptide	Relative frequency
CHAM810101.lag12	0.23	47.49	Normalized Moreau-Broto	Property: steric parameter; lag 12
LEI	0.23	47.71	Tripeptide	Relative frequency
PNL	0.23	47.94	Tripeptide	Relative frequency
CF	0.23	48.17	Dipeptide	Relative frequency
LKE	0.22	48.38	Tripeptide	Relative frequency
PLA	0.22	48.6	Tripeptide	Relative frequency
LS	0.21	48.81	Dipeptide	Relative frequency
DAYM780201.lag1	0.21	49.02	Normalized Moreau-Broto	Property: relative mutability; lag 1
SLQ	0.21	49.24	Tripeptide	Relative frequency
SLE	0.21	49.45	Tripeptide	Relative frequency
VYE	0.21	49.65	Tripeptide	Relative frequency
KLP	0.2	49.85	Tripeptide	Relative frequency
Feature names and categories are those described in the prot R Package (Xiao et al 2015, https://cran.r-project.org/web/packages/protr/vignettes/protr.html)
