# Supplementary material for: RFPDR: a random forest approach for plant disease resistance protein prediction
Source: PeerJ. 2022 Apr 22;10:e11683. doi: 10.7717/peerj.11683 (PMC9037127; doi:10.7717/peerj.11683)
Supplement: Supplemental Information 5 — Results of the predictions obtained on a n = 160 independent test set. RD-RFPDR: reduced dimension - Random forest plant disease resistance predictor; PSI-BLAST: Position Specific Iterated BLAST (Altschul, 1997); SVM, Support Vector Machine; RRGPredictor: Santana Silva & Micheli, 2020; DRAGO2: Osuna-Cruz et al., 2018. Class (correct classification): R (validated disease resistance protein) and non-R. [file peerj-10-11683-s005.xlsx]

## Sheet: Table_S4
Supplementary table S4. Comparison with other strategies					q
Results of the predictions obtained on a n = 160 independent test set.
RD-RFPDR: reduced dimension - Random forest plant disease resistance predictor; PSI-BLAST: Position Specific Iterated BLAST (Altschul et al., 1997); SVM: Support Vector Machine; RRGPredictor: Santana-Silva & Micheli, 2020; DRAGO2: Osuna-Cruz et al., 2017.
Protein_ID	RD-RFPDR	PSI-BLAST	SVM	RRGPredictor	DRAGO2	CLASS
DM10^Col-0	R	R	R	R	R	R
BAR1	R	R	R	R	R	R
Bs4	R	R	Non-R	R	R	R
DSC2	R	R	R	R	R	R
L1	R	R	R	R	R	R
Ma	R	R	R	R	R	R
muRdr1H	R	R	R	R	R	R
RPP1-NdA	R	R	R	R	R	R
RPP4	R	R	R	R	R	R
RPP5	R	R	R	R	R	R
RPS4	R	R	R	R	R	R
TAO1	R	R	R	R	R	R
TN2	Non-R	R	R	R	R	R
WRR8^Sf-2	R	R	R	R	R	R
Pm60	R	R	Non-R	R	R	R
Lr21	R	Non-R	R	R	R	R
PmR1	R	R	R	R	R	R
alpha-WOLF2	R	R	R	R	R	R
alpha-WOLF11	R	R	R	R	R	R
Adnr1	R	Non-R	R	R	R	R
3gG2	R	R	R	R	R	R
AhRRS5	R	Non-R	R	R	R	R
Fom-2	R	R	R	R	R	R
LOV1	R	R	R	R	R	R
Lr22a	R	Non-R	R	R	R	R
MLA12	R	R	R	R	R	R
MLA32	R	R	R	R	R	R
NbZAR1	R	R	R	R	R	R
NiattPtr1	R	R	R	R	R	R
NRC4b	R	R	R	R	R	R
Pi1-5	R	R	R	R	R	R
Pi5-3	R	R	R	R	R	R
Pi36	R	Non-R	R	R	R	R
Pi37	R	R	R	R	R	R
Pib	R	R	R	R	R	R
Pit	R	Non-R	R	R	R	R
Pi-ta	R	Non-R	R	R	R	R
R2-like	R	R	R	R	R	R
R3b	R	R	R	R	R	R
RGA2a	R	Non-R	R	R	R	R
Rpg1b	R	R	R	R	R	R
RPM1	R	Non-R	R	R	R	R
rpp8_sus	R	R	R	R	R	R
Rxo1	R	Non-R	R	R	R	R
Sr33	R	R	R	R	R	R
YrU1	R	Non-R	R	R	R	R
YrU1-RGA4	R	Non-R	R	R	R	R
HvRGA1	R	Non-R	R	R	R	R
CW9	R	R	R	R	R	R
Rpi-bt1	R	R	R	R	R	R
AtNRG1.1	R	R	R	R	R	R
NbADR1	R	R	R	R	R	R
NRG1	R		R	R	R	R
Tsw	R	R	R	R	R	R
Rpp4C4	R	Non-R	R	R	R	R
SUT1	R	R	R	R	R	R
RFL1	R	R	R	R	R	R
RPP39	R	R	R	R	R	R
Rpi-amr1e	R	R	R	R	R	R
Rpi-amr1e-2300	R	R	R	R	R	R
Sw5-b	R	R	R	R	R	R
Gpa2	R	R	R	R	R	R
Rx2	R	R	R	R	R	R
Hero-A	R	R	Non-R	R	R	R
AIW65095.1	R	Non-R	Non-R	R	R	R
NP_200838.1	R	Non-R	R	R	R	R
NP_564775.1	R	Non-R	R	R	R	R
NP_190295.1	R	Non-R	R	R	R	R
NP_180827.1	R	R	R	R	R	R
NP_187187.1	R	R	R	R	R	R
NP_178999.2	R	R	R	R	R	R
NP_568696.1	R	Non-R	R	R	R	R
NP_190723.1	Non-R	Non-R	R	R	R	R
NP_001234730.1	R	R	R	R	R	R
NP_200249.1	R	Non-R	R	R	R	R
OIT22113.1	R	Non-R	Non-R	R	R	R
BAG68210.1	Non-R	Non-R	Non-R	R	R	R
134_Cf4A	R	R	R	R	R	R
129_Asc-1	Non-R	Non-R	Non-R	Non-R	Non-R	R
150964_RTM1	Non-R	Non-R	R	Non-R	Non-R	R
170027_Fen	R	Non-R	R	R	R	R
170028_Pti1	Non-R	Non-R	Non-R	R	R	R
170030_Xa25	Non-R	Non-R	R	Non-R	Non-R	R
170033_Ty-1	R	Non-R	R	Non-R	Non-R	R
170036_Pvr2	Non-R	Non-R	Non-R	Non-R	Non-R	R
CsWAKL08	R	R	Non-R	R	R	R
TaWAK6	R	Non-R	Non-R	R	R	R
NbEIX2	R	R	Non-R	R	R	R
LepR3	R	R	Non-R	R	R	R
AhRLK1	R	Non-R	Non-R	R	R	R
Solyc01g095790.3.1	Non-R	Non-R	Non-R	Non-R	Non-R	Non-R
TraesCS2D02G491500.1.cds1	Non-R	Non-R	Non-R	Non-R	Non-R	Non-R
TraesCS1D02G440900.1	Non-R	Non-R	Non-R	Non-R	Non-R	Non-R
KRH43754	Non-R	Non-R	Non-R	Non-R	Non-R	Non-R
KRG94934	Non-R	Non-R	Non-R	Non-R	Non-R	Non-R
AT5G05020.1	Non-R	Non-R	Non-R	Non-R	Non-R	Non-R
TraesCS5A02G450500.1.cds1	Non-R	Non-R	Non-R	Non-R	Non-R	Non-R
KRH62573	Non-R	Non-R	Non-R	Non-R	Non-R	Non-R
KRH16879	Non-R	Non-R	Non-R	Non-R	Non-R	Non-R
AT3G49540.1	Non-R	Non-R	Non-R	Non-R	Non-R	Non-R
Os10t0549550-00	Non-R	Non-R	Non-R	Non-R	Non-R	Non-R
AT1G30925.1	Non-R	Non-R	Non-R	Non-R	Non-R	Non-R
TraesCS2B02G496000.1.cds1	Non-R	Non-R	Non-R	Non-R	Non-R	Non-R
Os03t0791432-01	Non-R	Non-R	Non-R	Non-R	Non-R	Non-R
Solyc03g033250.1.1.1	Non-R	Non-R	Non-R	Non-R	Non-R	Non-R
Solyc08g075900.1.1.1	Non-R	Non-R	Non-R	Non-R	Non-R	Non-R
Os12t0448400-01	Non-R	Non-R	Non-R	Non-R	Non-R	Non-R
HORVU2Hr1G031680.1	Non-R	Non-R	Non-R	Non-R	Non-R	Non-R
KRH40720	Non-R	Non-R	Non-R	Non-R	Non-R	Non-R
Os12t0594700-00	Non-R	Non-R	Non-R	Non-R	Non-R	Non-R
TraesCS3D02G469800.1	Non-R	Non-R	Non-R	Non-R	Non-R	Non-R
Os09t0405300-01	Non-R	Non-R	Non-R	Non-R	Non-R	Non-R
AT1G44050.1	Non-R	Non-R	Non-R	Non-R	Non-R	Non-R
Os12t0158900-00	Non-R	Non-R	Non-R	Non-R	Non-R	Non-R
AT3G56720.3	Non-R	Non-R	Non-R	Non-R	Non-R	Non-R
Os08t0182400-01	Non-R	Non-R	Non-R	Non-R	Non-R	Non-R
KRH33087	Non-R	Non-R	Non-R	Non-R	Non-R	Non-R
HORVU2Hr1G003280.9	Non-R	Non-R	Non-R	Non-R	Non-R	Non-R
AT1G10380.1	Non-R	Non-R	Non-R	Non-R	Non-R	Non-R
TraesCS3D02G100300.1.cds1	Non-R	Non-R	Non-R	Non-R	Non-R	Non-R
Os01t0309100-01	Non-R	Non-R	Non-R	Non-R	Non-R	Non-R
AT1G27250.1	Non-R	Non-R	Non-R	Non-R	Non-R	Non-R
AT5G63820.1	Non-R	Non-R	Non-R	Non-R	Non-R	Non-R
Solyc04g026105.1.1	Non-R	Non-R	Non-R	Non-R	Non-R	Non-R
Solyc07g026710.2.1	Non-R	Non-R	Non-R	Non-R	Non-R	Non-R
TraesCS5D02G397800.1.cds1	Non-R	Non-R	Non-R	Non-R	Non-R	Non-R
KRH53413	Non-R	Non-R	Non-R	Non-R	Non-R	Non-R
TraesCS1B02G179800.1	Non-R	Non-R	Non-R	Non-R	Non-R	Non-R
Os01t0148400-01	Non-R	Non-R	Non-R	Non-R	Non-R	Non-R
TraesCS2A02G119000.1	Non-R	Non-R	Non-R	R	Non-R	Non-R
Os01t0198100-01	Non-R	Non-R	Non-R	Non-R	Non-R	Non-R
TraesCS7D02G005700.1	Non-R	Non-R	Non-R	Non-R	Non-R	Non-R
Solyc04g009670.1.1.1	Non-R	Non-R	Non-R	Non-R	Non-R	Non-R
Solyc06g069170.3.1	Non-R	Non-R	Non-R	Non-R	Non-R	Non-R
TraesCS1D02G393100.1.cds1	Non-R	Non-R	Non-R	Non-R	Non-R	Non-R
KRH71095	Non-R	Non-R	Non-R	Non-R	Non-R	Non-R
TraesCS3D02G453900.1.cds1	Non-R	Non-R	Non-R	Non-R	Non-R	Non-R
Solyc09g083150.3.1	Non-R	Non-R	Non-R	Non-R	Non-R	Non-R
Os08t0330900-00	Non-R	Non-R	Non-R	Non-R	Non-R	Non-R
Solyc07g052240.3.1	Non-R	Non-R	Non-R	Non-R	Non-R	Non-R
KRG99089	Non-R	Non-R	Non-R	Non-R	Non-R	Non-R
Os04t0117200-01	Non-R	Non-R	Non-R	Non-R	Non-R	Non-R
TraesCS2A02G338700.1	Non-R	Non-R	Non-R	Non-R	Non-R	Non-R
HORVU2Hr1G016990.10	Non-R	Non-R	Non-R	Non-R	Non-R	Non-R
Solyc09g074100.3.1	Non-R	Non-R	Non-R	Non-R	Non-R	Non-R
Os12t0174200-01	Non-R	Non-R	R	Non-R	Non-R	Non-R
Os02t0600066-01	Non-R	Non-R	Non-R	Non-R	Non-R	Non-R
HORVU7Hr1G097500.25	Non-R	Non-R	Non-R	Non-R	Non-R	Non-R
TraesCS6B02G456100.1	Non-R	Non-R	Non-R	Non-R	Non-R	Non-R
Os04t0415600-00	Non-R	Non-R	Non-R	Non-R	Non-R	Non-R
AT4G14104.1	Non-R	Non-R	Non-R	Non-R	Non-R	Non-R
KRH72295	Non-R	Non-R	Non-R	Non-R	Non-R	Non-R
Os01t0150500-00	Non-R	Non-R	Non-R	Non-R	Non-R	Non-R
Solyc10g055065.1.1	Non-R	Non-R	Non-R	Non-R	Non-R	Non-R
HORVU4Hr1G008360.1	Non-R	Non-R	Non-R	Non-R	Non-R	Non-R
AT1G05690.1	Non-R	Non-R	Non-R	Non-R	Non-R	Non-R
Solyc08g061390.2.1	Non-R	Non-R	Non-R	Non-R	Non-R	Non-R
AT2G25530.1	Non-R	Non-R	Non-R	Non-R	Non-R	Non-R
TraesCS5A02G036100.1.cds1	Non-R	Non-R	Non-R	Non-R	Non-R	Non-R
TraesCS2D02G085400.1.cds1	Non-R	Non-R	Non-R	Non-R	Non-R	Non-R
Class (correct classification): R (validated disease resistance protein) and non-R.
